# Supplementary material for: Nickel-catalyzed arylative cyclization of 1,6-enynes: arylation of unactivated alkene moieties
Source: Royal Society of Chemistry journal article supplement (doi:10.1039/d4qo00784k), 2024-01-01
Supplement: d4qo00784k1.pdf [file d4qo00784k1.pdf]

## Supporting Information

# Nickel-catalyzed arylation cyclization of 1,6-enynes: arylation of unactivated alkene moieties

Jian Gao<sup>a</sup>, Qi Wei<sup>b</sup>, Zeqing Zhang<sup>a</sup>, Zhishan Su<sup>\*,b</sup>, Jialin Ming<sup>\*,a</sup>, and  
Yongmin Zhang<sup>\*,a</sup>

---

<sup>a</sup>Inner Mongolia University Research Center for Glycochemistry of Characteristic Medicinal Resources, College of Chemistry and Chemical Engineering, Inner Mongolia University, Hohhot, 010021, P. R. China

<sup>b</sup>Key Laboratory of Green Chemistry & Technology of Ministry of Education, College of Chemistry, Sichuan University, Chengdu, 610064, P. R. China

## Contents of Supporting Information

|                                                                                                                              |      |
|------------------------------------------------------------------------------------------------------------------------------|------|
| 1. General Information .....                                                                                                 | S1   |
| 2. Materials .....                                                                                                           | S1   |
| 3. Preparation of 1,6-Enynes .....                                                                                           | S2   |
| 4. A Typical Procedure for Ni-Catalyzed Cascade Cyclization of 1,6-Enynes with ArB(OH) <sub>2</sub> (Table 1, entry 1) ..... | S12  |
| 5. Synthetic Manipulations .....                                                                                             | S12  |
| 6. Mechanism Studies .....                                                                                                   | S14  |
| 7. Characterization of the Products .....                                                                                    | S16  |
| 8. Catalytic cycle .....                                                                                                     | S44  |
| 9. Single Crystal X-ray Diffraction Data for Compound 3ha (CCDC 2307259) .....                                               | S45  |
| 10. Details for the DFT Calculations .....                                                                                   | S46  |
| 11. Cartesian coordinates of all stationary points .....                                                                     | S47  |
| 12. Chiral HPLC charts and NMR Spectra .....                                                                                 | S111 |
| 13. References .....                                                                                                         | S196 |

## 1. General Information

All anaerobic and moisture-sensitive manipulations were carried out with standard Schlenk techniques under argon. NMR spectra were recorded on Bruker AVANCE III 500MHz and Bruker AVANCE NEO 600MHz. Chemical shifts are reported in  $\delta$  (ppm) referenced to the residual solvent peak of  $\text{CDCl}_3$  ( $\delta$  7.26) for  $^1\text{H}$  NMR and  $\text{CDCl}_3$  ( $\delta$  77.0) for  $^{13}\text{C}$  NMR. The following abbreviations are used to describe the multiplicities; s: singlet, d: doublet, t: triplet, q: quartet, quint: quintet, sext: sextet, hept: heptet, m: multipls. Coupling constants are reported in Hertz (Hz). HRESIMS spectras were acquired using the waters G2-Xs qtof mass spectrometer. GC-MS analyses were recorded on Shimadzu GCMS-QP2020 NX. For thin layer chromatography (TLC), NUO TAI precoated TLC plates (SHF254) were used, and compounds were visualized with a UV light at 254 nm. Further visualization was achieved by staining with  $\text{KMnO}_4$  followed by heating. Flash column chromatography was performed with Silica gel (SANPONT). Enantiomeric excesses (ee) were determined by HPLC analysis on Shimazu (LC-16) HPLC with Daicel chiral columns. The products were further purified by GPC (Gel Permeation Chromatography) if necessary.

## 2. Materials

Tetrahydrofuran, dichloromethane, toluene and diethyl ether were taken from a solvent purification. Diisopropyl malonate, dimethyl malonate, cuprous iodide, potassium *tert*-butoxide, *N*-bromosuccinimide (NBS), *p*-toluene sulfonic acid, sodium borohydride, phenylacetone, tetrahydropyrrole, formaldehyde, propionic acid, hexanal, sodium hydride, arylboronics acid,  $\text{Ni}(\text{cod})_2$ ,  $\text{PCy}_3$ ,  $\text{Ni}(\text{cod})(\text{DQ})$ ,  $\text{NiCl}_2$ , tris(4-methoxyphenyl)phosphine,  $\text{PdCl}_2(\text{PPh}_3)_2$ , and  $\text{PPh}_3$  were purchased and used as received. **1a**<sup>1</sup> (CAS NO. 379228-69-0) and **1d**<sup>2</sup> (CAS NO. 1609650-63-9) were prepared according to the reported procedures.

### 3. Preparation of 1,6-Enynes

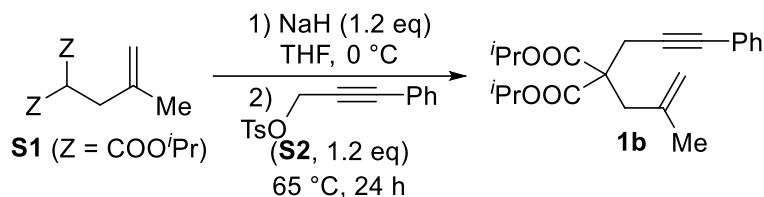

Under  $\text{N}_2$ , a suspension of NaH (60% in mineral oil, 0.198 g, 4.95 mmol) in THF (10 mL) was added a solution of allylmalonate **S1**<sup>3</sup> (CAS NO. 1912806-78-0, 1.00 g, 4.13 mmol) in THF (2.0 mL) dropwise at 0 °C. The mixture was stirred at room temperature for 30 min. A solution of alkyne **S2**<sup>4</sup> (CAS NO. 21541-60-6, 1.42 g, 4.95 mmol) in THF (2.0 mL) was added at 0 °C. The mixture was stirred at 65 °C for 24 h, quenched with saturated aqueous  $\text{NH}_4\text{Cl}$ , and extracted with ethyl acetate. The combined organic layers were dried over  $\text{MgSO}_4$  and filtered. The solvent was removed on a rotary evaporator. The residue was purified by flash column chromatography on silica gel (hexane/ ethyl acetate = 60:1) to give compound **1b** as a colorless oil (87% yield, 1.28 g, 3.59 mmol).  $R_f = 0.4$  (hexane/ethyl acetate (30/1)). **<sup>1</sup>H NMR** (600 MHz,  $\text{CDCl}_3$ ):  $\delta$  7.38–7.34 (m, 2 H), 7.30–7.24 (m, 3H), 5.08 (hept,  $J = 6.0$  Hz, 2H), 4.93 (s, 1H), 4.90 (s, 1H), 3.02 (s, 2H), 2.88 (s, 2H), 1.72 (s, 3H), 1.25 (d,  $J = 6.3$  Hz, 12H); **<sup>13</sup>C NMR** (151 MHz,  $\text{CDCl}_3$ ):  $\delta$  169.8, 140.3, 131.6, 128.2, 127.8, 123.4, 116.1, 85.0, 83.5, 69.1, 56.6, 39.4, 23.44, 23.41, 21.6, 21.5. **HRMS (ESI)** calcd for  $\text{C}_{22}\text{H}_{28}\text{O}_4\text{Na}^+$  [ $\text{M}+\text{Na}$ ]<sup>+</sup> 379.1880, found 379.1880.

Similarly to the preparation of compound **1b**, 1,6-enynes **1c**, **1f** and **1y** were prepared with the corresponding allylmalonates.

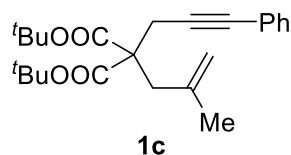

**Compound 1c.** (82% yield, 0.630 g, 1.36 mmol, a colorless oil,  $R_f = 0.4$  (hexane/ethyl acetate (20/1))). **<sup>1</sup>H NMR** (600 MHz,  $\text{CDCl}_3$ ):  $\delta$  7.37–7.34 (m, 2H), 7.27–7.25 (m, 3H), 4.91 (s, 2H), 2.95 (s, 2H), 2.80 (s, 2H), 1.75 (s, 3H), 1.48 (s, 18H); **<sup>13</sup>C NMR** (151 MHz,  $\text{CDCl}_3$ ):  $\delta$  169.4, 140.7, 131.5, 128.1, 127.7, 123.5, 115.8, 85.4, 83.4, 81.6, 57.5, 39.4, 27.8, 23.6, 23.5. **HRMS (ESI)** calcd for  $\text{C}_{24}\text{H}_{32}\text{O}_4\text{Na}^+$  [ $\text{M}+\text{Na}$ ]<sup>+</sup> 407.2193, found

407.2198.

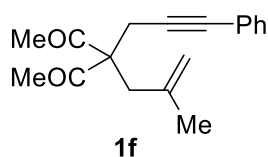

**Compound 1f.** (69% yield, 0.402 g, 1.50 mmol, a colorless oil, chromatography on silica gel, eluent: hexane/ethyl acetate (50/1),  $R_f = 0.4$  (hexane/ethyl acetate (20/1))).  $^1\text{H NMR}$  (600 MHz,  $\text{CDCl}_3$ ):  $\delta$  7.36–7.32 (m, 2H), 7.30–7.27 (m, 3H), 4.91 (s, 1H), 4.79 (s, 1H), 3.06 (s, 2H), 2.91 (s, 2H), 2.21 (s, 6H), 1.68 (s, 3H);  $^{13}\text{C NMR}$  (151 MHz,  $\text{CDCl}_3$ ):  $\delta$  205.1, 140.2, 131.6, 128.2, 128.1, 123.0, 115.5, 85.0, 84.2, 70.3, 38.6, 26.9, 23.8, 21.8. **HRMS (ESI)** calcd for  $\text{C}_{18}\text{H}_{20}\text{O}_2\text{Na}^+$   $[\text{M}+\text{Na}]^+$  291.1356, found 291.1361.

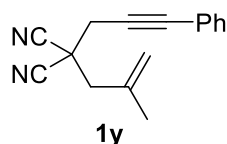

**Compound 1y.** (63% yield, 0.290 g, 1.24 mmol, a colorless oil, chromatography on silica gel, eluent: hexane/ethyl acetate (20/1),  $R_f = 0.4$  (hexane/ethyl acetate (20/1))).  $^1\text{H NMR}$  (600 MHz,  $\text{CDCl}_3$ ):  $\delta$  7.47 (d,  $J = 5.5$  Hz, 2H), 7.39–7.30 (m, 3H), 5.21 (s, 1H), 5.16 (s, 1H), 3.17 (s, 2H), 2.83 (s, 2H), 2.00 (s, 3H);  $^{13}\text{C NMR}$  (151 MHz,  $\text{CDCl}_3$ ):  $\delta$  136.8, 131.9, 129.0, 128.4, 121.7, 119.2, 114.9, 87.2, 79.6, 43.8, 36.2, 29.6, 23.1. **HRMS (ESI)** calcd for  $\text{C}_{16}\text{H}_{14}\text{N}_2^+$   $[\text{M}+\text{H}]^+$  235.1230, found 235.1236.

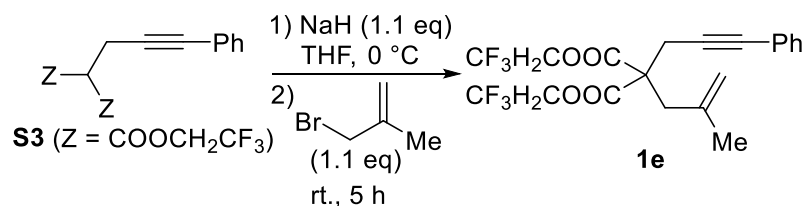

Under  $\text{N}_2$ , a suspension of NaH (60% in mineral oil, 80.6 mg, 2.01 mmol) in THF (5.0 mL) was added a solution of **S3**<sup>5</sup> (CAS NO. 2376294-99-2, 0.700 g, 1.83 mmol) in THF (1.0 mL) dropwise at 0 °C. The mixture was stirred at room temperature for 30 min. A solution of 3-bromo-2-methylpropene (0.271 g, 2.01 mmol) in THF (1.0 mL) was added at 0 °C. The mixture was stirred at room temperature for 5 h, quenched with saturated aqueous  $\text{NH}_4\text{Cl}$ , and extracted with ethyl acetate (20 mL  $\times$  3). The combined organic layers were dried over  $\text{MgSO}_4$  and filtered. The solvent was removed on a



rotary evaporator. The residue was purified by flash column chromatography on silica gel (hexane/ ethyl acetate = 80:1) to give compound **1e** as a colorless oil (61% yield, 0.485 g, 1.11 mmol).  $R_f = 0.4$  (hexane/ethyl acetate (40/1)).  $^1\text{H NMR}$  (600 MHz,  $\text{CDCl}_3$ ):  $\delta$  7.38–7.34 (m, 2H), 7.32–7.27 (m, 3H), 5.00 (quint,  $J = 1.6$  Hz, 1H), 4.92 (s, 1H), 4.54 (q,  $J = 8.2$  Hz, 4H), 3.13 (s, 2H), 2.97 (s, 2H), 1.73 (s, 3H);  $^{13}\text{C NMR}$  (151 MHz,  $\text{CDCl}_3$ ):  $\delta$  168.0, 138.9, 131.6, 128.3, 122.8, 122.5 (q,  $J = 277.5$  Hz), 117.2, 84.7, 82.9, 61.3 (q,  $J = 37.5$  Hz), 57.1, 39.6, 29.7, 23.8, 23.2.  $^{19}\text{F}\{^1\text{H}\}$  NMR (565 MHz,  $\text{CDCl}_3$ ):  $\delta$  -74.1 (s, 6F). **HRMS (ESI)** calcd for  $\text{C}_{20}\text{H}_{18}\text{F}_6\text{O}_4\text{Na}^+$   $[\text{M}+\text{Na}]^+$  459.1001, found 459.1008.

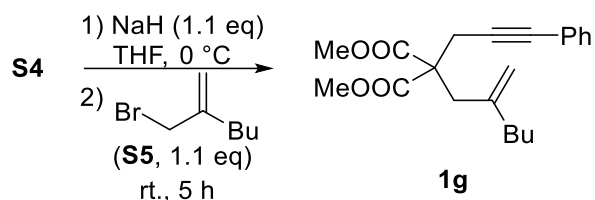

Under  $\text{N}_2$ , a suspension of NaH (60% in mineral oil, 88.0 mg, 2.20 mmol) in THF (5.0 mL) was added a solution of phenylpropynemalonate **S4**<sup>6</sup> (CAS NO. 346621-58-7, 0.493 g, 2.0 mmol) in THF (2.0 mL) dropwise at 0 °C. The mixture was stirred at room temperature for 30 min. A solution of **S5**<sup>7</sup> (CAS NO. 123004-86-4, 390 mg, 2.20 mmol) was added to the mixture at 0 °C. The mixture was stirred at room temperature for 1.5 h before saturated aqueous  $\text{NH}_4\text{Cl}$  (10 mL) was added. The mixture was extracted with ethyl acetate. The combined organic layers were dried over  $\text{MgSO}_4$  and filtered. The solvent was removed on a rotary evaporator. The residue was purified by flash column chromatography on silica gel (hexane/ ethyl acetate = 20:1) to give compound **1g** (76% yield, 0.521 g, 1.52 mmol) as a colorless oil.  $R_f = 0.4$  (hexane/ethyl acetate (10/1)).  $^1\text{H NMR}$  (600 MHz,  $\text{CDCl}_3$ ):  $\delta$  7.39–7.34 (m, 2H), 7.29–7.26 (m, 3H), 4.93 (q,  $J = 1.6$  Hz, 1H), 4.89 (s, 1H), 3.75 (s, 6H), 3.06 (s, 2H), 2.91 (s, 2H), 1.94 (t,  $J = 8.0$  Hz, 2H), 1.42 (quint,  $J = 7.4$  Hz, 2H), 1.29 (sext,  $J = 7.3$  Hz, 2H), 0.88 (t,  $J = 7.4$  Hz, 3H);  $^{13}\text{C NMR}$  (151 MHz,  $\text{CDCl}_3$ ):  $\delta$  170.7, 144.2, 131.6, 128.2, 127.9, 123.2, 114.8, 84.6, 83.9, 57.1, 52.7, 37.4, 36.3, 30.1, 23.5, 22.3, 13.9. **HRMS (ESI)** calcd for  $\text{C}_{21}\text{H}_{26}\text{O}_4\text{Na}^+$   $[\text{M}+\text{Na}]^+$  365.1723, found 365.1727.

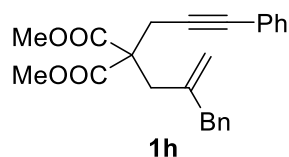

Similarly to the preparation of compound **1g**, 1,6-enyne **1h** was prepared from the compound **S4** and [2-(bromomethyl)-2-propen-1-yl]benzene<sup>2</sup> (CAS NO. 30457-89-7, 0.507 g, 2.4 mmol). Compound **1h** (92% yield, 0.693 g, 1.84 mmol, a colorless oil, chromatography on silica gel, eluent: hexane/ethyl acetate (30/1),  $R_f$  = 0.4 (hexane/ethyl acetate (10/1))). **<sup>1</sup>H NMR** (600 MHz, CDCl<sub>3</sub>): δ 7.37–7.33 (m, 2H), 7.32–7.23 (m, 5H), 7.22–7.14 (m, 3H), 5.02 (s, 1H), 4.93 (q,  $J$  = 1.5 Hz, 1H), 3.77 (s, 6H), 3.29 (s, 2H), 3.13 (s, 2H), 2.89 (s, 2H); **<sup>13</sup>C NMR** (151 MHz, CDCl<sub>3</sub>): δ 170.6, 143.4, 139.0, 131.6, 129.1, 128.3, 128.2, 128.0, 126.2, 123.1, 117.3, 84.5, 84.1, 57.2, 52.7, 43.5, 36.8, 23.8. **HRMS (ESI)** calcd for C<sub>21</sub>H<sub>26</sub>O<sub>4</sub>Na<sup>+</sup> [M+Na]<sup>+</sup> 399.1567, found 399.1567.

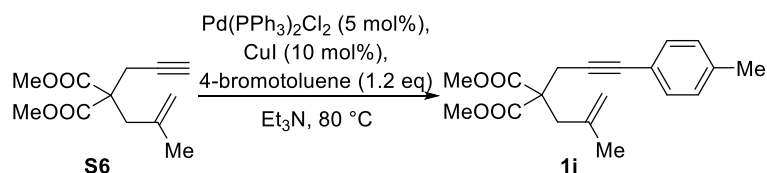

A dry Schlenk tube was charged with compound **S6**<sup>8</sup> (CAS NO. 109468-75-9, 0.200 g, 0.891 mmol), Pd(PPh<sub>3</sub>)<sub>2</sub>Cl<sub>2</sub> (31.3 mg, 0.0446 mmol, 5 mol% of Pd), and CuI (17.0 mg, 0.0891 mmol, 10 mol%). Triethylamine (0.451 g, 4.46 mmol) and 4-bromotoluene (0.183 g, 1.07 mmol) were added. The mixture was stirred at 80 °C overnight. The reaction mixture was diluted with ethyl acetate, washed with water and brine, dried with anhydrous MgSO<sub>4</sub>, and filtered. The solvent was removed on a rotary evaporator. The residue was purified by flash column chromatography on silica gel (hexane/ ethyl acetate = 20:1) to give compound **1i** (95% yield, 0.268 g, 0.851 mmol) as a colorless oil.  $R_f$  = 0.4 (hexane/ethyl acetate (10/1)). **<sup>1</sup>H NMR** (600 MHz, CDCl<sub>3</sub>): δ 7.28 (d,  $J$  = 8.2 Hz, 2H), 7.10 (d,  $J$  = 7.9 Hz, 2H), 4.96 (s, 1H), 4.91 (s, 1H), 3.77 (s, 6H), 3.07 (s, 2H), 2.94 (s, 2H), 2.34 (s, 3H), 1.72 (s, 3H); **<sup>13</sup>C NMR** (151 MHz, CDCl<sub>3</sub>): δ 170.7, 139.9, 138.0, 131.5, 128.9, 120.2, 116.2, 83.9, 83.7, 56.9, 52.7, 39.7, 23.6, 23.2, 21.4. **HRMS (ESI)** calcd for C<sub>19</sub>H<sub>22</sub>O<sub>4</sub>Na<sup>+</sup> [M+Na]<sup>+</sup> 337.1416, Found 337.1415.

Similarly to the preparation of compound **1i**, 1,6-enynes **1j–1n** and **1t–1x** were prepared with the corresponding arylboromides.

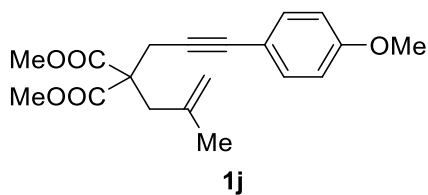

**Compound 1j.** (95% yield, 0.281 g, 0.851 mmol, a colorless oil, chromatography on silica gel, eluent: hexane/ethyl acetate (40/1),  $R_f = 0.4$  (hexane/ethyl acetate (20/1))).  $^1\text{H NMR}$  (600 MHz,  $\text{CDCl}_3$ ):  $\delta$  7.30 (d,  $J = 8.8$  Hz, 2H), 6.80 (d,  $J = 8.8$  Hz, 2H), 4.93 (s, 1H), 4.88 (s, 1H), 3.79 (s, 3H), 3.75 (s, 6H), 3.04 (s, 2H), 2.90 (s, 2H), 1.69 (s, 3H);  $^{13}\text{C NMR}$  (151 MHz,  $\text{CDCl}_3$ ):  $\delta$  170.7, 159.3, 139.9, 133.0, 116.2, 115.4, 113.8, 83.6, 82.9, 56.9, 55.2, 52.7, 39.7, 23.6, 23.2. **HRMS (ESI)** calcd for  $\text{C}_{19}\text{H}_{22}\text{O}_5\text{Na}^+$   $[\text{M}+\text{Na}]^+$  353.1359, Found 353.1364.

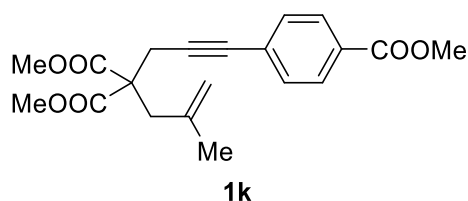

**Compound 1k.** (93% yield, 0.299 g, 0.833 mmol, a colorless oil, chromatography on silica gel, eluent: hexane/ethyl acetate (40/1),  $R_f = 0.4$  (hexane/ethyl acetate (20/1))).  $^1\text{H NMR}$  (600 MHz,  $\text{CDCl}_3$ ):  $\delta$  7.95 (d,  $J = 8.3$  Hz, 2H), 7.42 (d,  $J = 8.4$  Hz, 2H), 4.94 (s, 1H), 4.88 (s, 1H), 3.91 (s, 3H), 3.77 (s, 6H), 3.08 (s, 2H), 2.91 (s, 2H), 1.69 (s, 3H);  $^{13}\text{C NMR}$  (151 MHz,  $\text{CDCl}_3$ ):  $\delta$  170.6, 166.5, 139.8, 131.5, 129.41, 129.36, 127.9, 116.4, 88.0, 83.2, 56.7, 52.8, 52.2, 39.9, 23.7, 23.2. **HRMS (ESI)** calcd for  $\text{C}_{20}\text{H}_{22}\text{O}_6\text{Na}^+$   $[\text{M}+\text{Na}]^+$  381.1309, Found 381.1306.

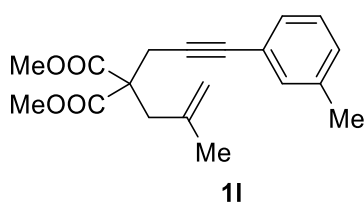

**Compound 1l.** (90% yield, 0.253 g, 0.806 mmol, a colorless oil, chromatography on silica gel, eluent: hexane/ethyl acetate (40/1),  $R_f = 0.4$  (hexane/ethyl acetate (20/1))).  $^1\text{H NMR}$  (600 MHz,  $\text{CDCl}_3$ ):  $\delta$  7.19 (s, 1H), 7.16 (t,  $J = 7.5$  Hz, 2H), 7.09 (d,  $J = 6.8$  Hz, 1H), 4.94 (s, 1H), 4.89 (s, 1H), 3.76 (s, 6H), 3.06 (s, 2H), 2.92 (s, 2H), 2.31 (s, 3H), 1.70 (s, 3H);  $^{13}\text{C NMR}$  (151 MHz,  $\text{CDCl}_3$ ):  $\delta$  170.7, 139.9, 137.8, 132.1, 128.8, 128.7, 128.1, 123.0, 116.3, 84.1, 84.0, 56.8, 52.7, 39.7, 23.6, 23.2, 21.1. **HRMS (ESI)** calcd

for  $C_{19}H_{22}O_4Na^+$   $[M+Na]^+$  337.1410, Found 337.1417.

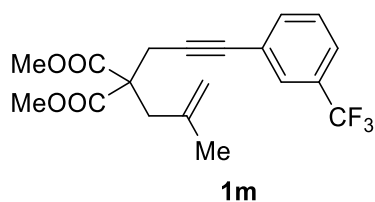

**Compound 1m.** (83% yield, 0.274 g, 0.744 mmol, a colorless oil, chromatography on silica gel, eluent: hexane/ethyl acetate (40/1),  $R_f = 0.4$  (hexane/ethyl acetate (20/1))).  $^1H$  NMR (600 MHz,  $CDCl_3$ ):  $\delta$  7.62 (s, 1H), 7.54 (d,  $J = 7.6$  Hz, 2H), 7.42 (t,  $J = 7.8$  Hz, 1H), 4.97 (s, 1H), 4.89 (s, 1H), 3.78 (s, 6H), 3.09 (s, 2H), 2.92 (s, 2H), 1.71 (s, 3H);  $^{13}C$  NMR (151 MHz,  $CDCl_3$ ): 171.5, 140.8, 135.8, 131.9 (q,  $J = 32.4$  Hz), 129.7, 129.3 (q,  $J = 3.9$  Hz), 125.1, 125.6 (q,  $J = 3.8$  Hz), 124.7 (q,  $J = 273.2$  Hz), 117.4, 87.5, 83.4, 57.7, 53.7, 40.9, 24.6, 24.2. **HRMS (ESI)** calcd for  $C_{19}H_{19}F_3O_4Na^+$   $[M+Na]^+$  391.1128, Found 391.1136.

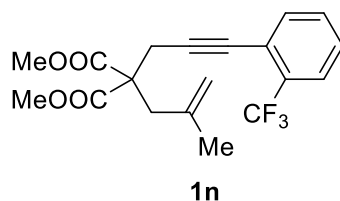

**Compound 1n.** (87% yield, 0.286 g, 0.776 mmol, a colorless oil, chromatography on silica gel, eluent: hexane/ethyl acetate (40/1),  $R_f = 0.4$  (hexane/ethyl acetate (20/1))).  $^1H$  NMR (600 MHz,  $CDCl_3$ ):  $\delta$  7.60 (d,  $J = 7.9$  Hz, 1H), 7.51 (d,  $J = 7.7$  Hz, 1H), 7.44 (t,  $J = 7.6$  Hz, 1H), 7.35 (t,  $J = 7.7$  Hz, 1H), 4.93 (s, 1H), 4.87 (s, 1H), 3.75 (s, 6H), 3.11 (s, 2H), 2.91 (s, 2H), 1.68 (s, 3H);  $^{13}C$  NMR (151 MHz,  $CDCl_3$ ):  $\delta$  170.4, 139.9, 134.3, 131.33 (q,  $J = 30.3$  Hz), 131.26, 127.7, 125.6 (q,  $J = 5.1$  Hz), 123.5 (q,  $J = 273.3$  Hz), 121.4, 116.3, 90.7, 79.6, 56.7, 52.7, 39.6, 23.7, 23.1. **HRMS (ESI)** calcd for  $C_{19}H_{19}F_3O_4Na^+$   $[M+Na]^+$  391.1128, Found 391.1136.

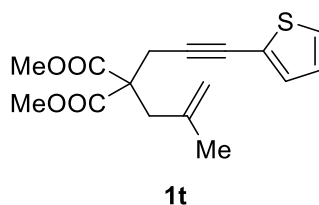

**Compound 1t.** (85% yield, 0.233 g, 0.762 mmol, a colorless oil, chromatography on silica gel, eluent: hexane/ethyl acetate (40/1),  $R_f = 0.4$  (hexane/ethyl acetate (20/1))).

$^1\text{H NMR}$  (600 MHz,  $\text{CDCl}_3$ ):  $\delta$  7.18 (d,  $J = 5.2$  Hz, 1H), 7.11 (d,  $J = 3.6$  Hz, 1H), 6.92 (dd,  $J = 5.2, 3.6$  Hz, 1H), 4.93 (s, 1H), 4.87 (s, 1H), 3.76 (s, 6H), 3.08 (s, 2H), 2.89 (s, 2H), 1.69 (s, 3H);  $^{13}\text{C NMR}$  (151 MHz,  $\text{CDCl}_3$ ):  $\delta$  170.6, 139.8, 131.5, 126.8, 126.5, 123.2, 116.4, 88.6, 76.9, 56.7, 52.7, 39.8, 23.9, 23.2. **HRMS (ESI)** calcd for  $\text{C}_{16}\text{H}_{18}\text{O}_4\text{SNa}^+$   $[\text{M}+\text{Na}]^+$  329.0818, Found 329.0828.

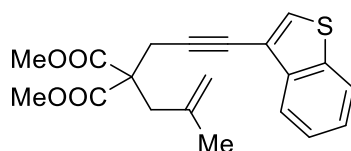

**1u**

**Compound 1u.** (83% yield, 0.265 g, 0.744 mmol, a colorless oil, chromatography on silica gel, eluent: hexane/ethyl acetate (40/1),  $R_f = 0.4$  (hexane/ethyl acetate (20/1))).  $^1\text{H NMR}$  (600 MHz,  $\text{CDCl}_3$ ):  $\delta$  7.93 (d,  $J = 8.0$  Hz, 1H), 7.85 (d,  $J = 7.7$  Hz, 1H), 7.55 (s, 1H), 7.48 (t,  $J = 7.6$  Hz, 1H), 7.40 (t,  $J = 7.6$  Hz, 1H), 4.99 (s, 1H), 4.96 (s, 1H), 3.81 (s, 6H), 3.20 (s, 2H), 3.01 (s, 2H), 1.75 (s, 3H);  $^{13}\text{C NMR}$  (151 MHz,  $\text{CDCl}_3$ ):  $\delta$  170.6, 139.9, 139.3, 138.7, 129.5, 124.9, 124.7, 122.9, 122.5, 118.2, 116.4, 87.1, 77.4, 56.8, 52.8, 39.9, 23.9, 23.2. **HRMS (ESI)** calcd for  $\text{C}_{20}\text{H}_{20}\text{O}_4\text{SNa}^+$   $[\text{M}+\text{Na}]^+$  379.0975, Found 379.0981.

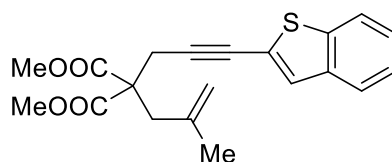

**1v**

**Compound 1v.** (85% yield, 0.271 g, 0.762 mmol, a colorless oil, chromatography on silica gel, eluent: hexane/ethyl acetate (40/1),  $R_f = 0.4$  (hexane/ethyl acetate (20/1))).  $^1\text{H NMR}$  (600 MHz,  $\text{CDCl}_3$ ):  $\delta$  7.76–7.67 (m, 2H), 7.35 (s, 1H), 7.34–7.31 (m, 2H), 4.97 (s, 1H), 4.91 (s, 1H), 3.78 (s, 6H), 3.13 (s, 2H), 2.93 (s, 2H), 1.71 (s, 3H);  $^{13}\text{C NMR}$  (151 MHz,  $\text{CDCl}_3$ ):  $\delta$  170.5, 139.9, 139.8, 139.0, 128.3, 125.3, 124.6, 123.6, 123.1, 121.9, 116.5, 90.9, 77.3, 56.7, 52.8, 39.9, 24.0, 23.2. **HRMS (ESI)** calcd for  $\text{C}_{20}\text{H}_{20}\text{O}_4\text{SNa}^+$   $[\text{M}+\text{Na}]^+$  3379.0975, Found 379.0971.

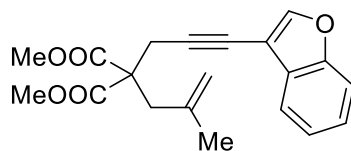

**1w**

**Compound 1w.** (89% yield, 0.271 g, 0.797 mmol, a colorless oil, chromatography on silica gel, eluent: hexane/ethyl acetate (40/1),  $R_f = 0.4$  (hexane/ethyl acetate (20/1))).  $^1\text{H NMR}$  (600 MHz,  $\text{CDCl}_3$ ):  $\delta$  7.74 (s, 1H), 7.64 (d,  $J = 7.1$  Hz, 1H), 7.47 (d,  $J = 7.1$  Hz, 1H), 7.35–7.27 (m, 2H), 4.96 (s, 1H), 4.92 (s, 1H), 3.78 (s, 6H), 3.15 (s, 2H), 2.97 (s, 2H), 1.72 (s, 3H);  $^{13}\text{C NMR}$  (151 MHz,  $\text{CDCl}_3$ ):  $\delta$  170.6, 154.5, 147.2, 139.9, 127.9, 125.1, 123.3, 120.3, 116.4, 111.5, 104.3, 89.3, 73.1, 56.8, 52.8, 39.8, 23.9, 23.2. **HRMS (ESI)** calcd for  $\text{C}_{20}\text{H}_{20}\text{O}_5\text{Na}^+ [\text{M}+\text{Na}]^+$  363.1203, Found 363.1207.

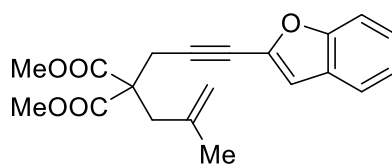

**1x**

**Compound 1x.** (89% yield, 0.271 g, 0.797 mmol, a colorless oil, chromatography on silica gel, eluent: hexane/ethyl acetate (40/1),  $R_f = 0.4$  (hexane/ethyl acetate (20/1))).  $^1\text{H NMR}$  (600 MHz,  $\text{CDCl}_3$ ):  $\delta$  7.52 (d,  $J = 7.8$  Hz, 1H), 7.42 (d,  $J = 8.3$  Hz, 1H), 7.30 (t,  $J = 7.8$  Hz, 1H), 7.21 (t,  $J = 7.5$  Hz, 1H), 6.85 (s, 1H), 4.97 (s, 1H), 4.92 (s, 1H), 3.78 (s, 6H), 3.16 (s, 2H), 2.93 (s, 2H), 1.70 (s, 3H);  $^{13}\text{C NMR}$  (151 MHz,  $\text{CDCl}_3$ ):  $\delta$  170.4, 154.6, 139.7, 138.5, 127.5, 125.4, 123.1, 121.0, 116.6, 111.12, 111.08, 91.2, 74.3, 56.5, 52.8, 39.9, 23.8, 23.1. **HRMS (ESI)** calcd for  $\text{C}_{20}\text{H}_{20}\text{O}_5\text{Na}^+ [\text{M}+\text{Na}]^+$  363.1203, Found 363.1205.

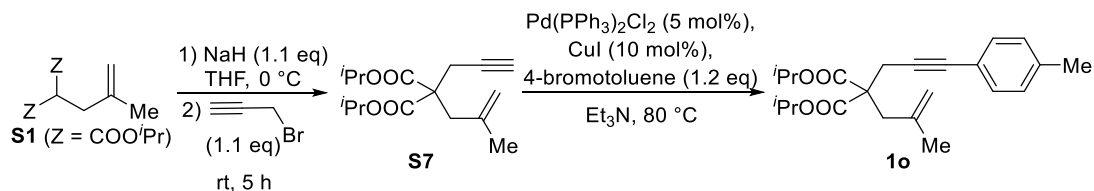

Under  $\text{N}_2$ , a suspension of NaH (60% in mineral oil, 0.248 g, 6.81 mmol) in THF (7.0 mL) was added a solution of **S1** (1.50 g, 6.19 mmol) in THF (2.0 mL) dropwise at  $0^\circ\text{C}$ , and the mixture was stirred at room temperature for 10 min. A solution of 3-

bromopropyne (0.919 g, 6.81 mmol) was added at 0 °C. The mixture was stirred at room temperature for 5 h, quenched with saturated aqueous NH<sub>4</sub>Cl, and extracted with ethyl acetate. The combined organic layers were dried over MgSO<sub>4</sub> and filtered. The solvent was removed on a rotary evaporator. The residue was purified by flash column chromatography on silica gel (hexane/ ethyl acetate = 40:1) to give compound **S7** as a white solid (95% yield, 1.65 g, 5.88 mmol). *R<sub>f</sub>* = 0.4 (hexane/ethyl acetate (20/1)). <sup>1</sup>H NMR (600 MHz, CDCl<sub>3</sub>): δ 5.06 (hept, *J* = 6.3 Hz, 2H), 4.90 (s, 1H), 4.87 (s, 1H), 2.82 (s, 2H), 2.81(d, *J* = 2.7 Hz, 2H), 2.01 (t, *J* = 2.7 Hz, 1H), 1.68 (s, 3H), 1.24 (d, *J* = 6.2 Hz, 12H); <sup>13</sup>C NMR (151 MHz, CDCl<sub>3</sub>): δ 169.6, 140.1, 116.1, 79.4, 71.4, 69.2, 56.2, 39.2, 23.3, 22.5, 21.5. HRMS (ESI) calcd for C<sub>16</sub>H<sub>24</sub>O<sub>4</sub>Na<sup>+</sup> [M+Na]<sup>+</sup> 303.1567, found 303.1570.

The synthesis method from **S7** to compound **1o** is similar to that of compound **1i**. <sup>1</sup>H NMR (600 MHz, CDCl<sub>3</sub>): δ 7.29 (d, *J* = 8.7 Hz, 2H), 6.80 (d, *J* = 8.8 Hz, 2H), 5.07 (hept, *J* = 6.2 Hz, 2H), 4.92 (s, 1H), 4.90 (s, 1H), 3.79 (s, 3H), 3.00 (s, 2H), 2.87 (s, 2H), 1.71 (s, 3H), 1.25 (d, *J* = 6.3 Hz, 12H); <sup>13</sup>C NMR (151 MHz, CDCl<sub>3</sub>): δ 169.8, 140.4, 137.8, 131.5, 128.9, 120.4, 116.0, 84.2, 83.6, 69.1, 56.7, 39.5, 23.5, 23.4, 21.6, 21.5, 21.4. HRMS (ESI) calcd for C<sub>23</sub>H<sub>30</sub>O<sub>4</sub>Na<sup>+</sup> [M+Na]<sup>+</sup> 393.2036, found 393.2041.

Similarly to the preparation of compound **1o**, 1,6-enynes **1p–1s** were prepared with the corresponding arylbromides.

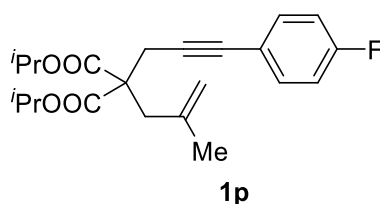

**Compound 1p.** (96% yield, 0.256 g, 0.684 mmol, a colorless oil, chromatography on silica gel, eluent: hexane/ethyl acetate (40/1), *R<sub>f</sub>* = 0.4 (hexane/ethyl acetate (20/1))). <sup>1</sup>H NMR (600 MHz, CDCl<sub>3</sub>): δ 7.33 (dd, *J* = 8.6, 5.5 Hz, 2H), 6.96 (t, *J* = 8.7 Hz, 2H), 5.07 (hept, *J* = 6.2 Hz, 2H), 4.92 (s, 1H), 4.89 (s, 1H), 3.00 (s, 2H), 2.86 (s, 2H), 1.71 (s, 3H), 1.25 (d, *J* = 6.4 Hz, 6H), 1.24 (d, *J* = 6.4 Hz, 6H); <sup>13</sup>C NMR (151 MHz, CDCl<sub>3</sub>): δ 169.8, 162.3 (d, *J* = 248.9 Hz), 140.3, 133.4 (d, *J* = 8.2 Hz), 119.5 (d, *J* = 3.4 Hz), 116.1, 115.4 (d, *J* = 21.9 Hz), 84.7, 82.5, 69.1, 56.6, 39.5, 23.43, 23.39, 21.6, 21.5.

**HRMS (ESI)** calcd for  $C_{22}H_{27}FO_4Na^+$   $[M+Na]^+$  397.1786, found 397.1789.

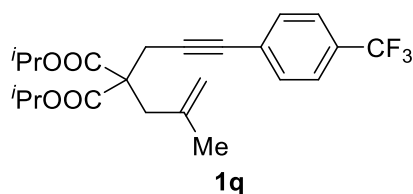

**Compound 1q.** (90% yield, 0.272 g, 0.641 mmol, a colorless oil, chromatography on silica gel, eluent: hexane/ethyl acetate (40/1),  $R_f = 0.4$  (hexane/ethyl acetate (20/1))).  $^1H$  NMR (600 MHz,  $CDCl_3$ ):  $\delta$  7.53 (d,  $J = 8.0$  Hz, 2H), 7.45 (d,  $J = 8.0$  Hz, 2H), 5.08 (hept,  $J = 6.3$  Hz, 2H), 4.93 (s, 1H), 4.88 (s, 1H), 3.07 (s, 2H), 2.87 (s, 2H), 1.71 (s, 3H), 1.254 (d,  $J = 6.2$  Hz, 6H), 1.247 (d,  $J = 6.3$  Hz, 6H);  $^{13}C$  NMR (151 MHz,  $CDCl_3$ ):  $\delta$  169.7, 140.2, 131.8, 129.7 (q,  $J = 32.6$  Hz), 127.2, 125.1 (q,  $J = 3.8$  Hz), 123.9 (q,  $J = 273.2$  Hz), 116.2, 88.0, 82.4, 69.3, 56.5, 39.4, 23.5, 23.4, 21.6, 21.5. **HRMS (ESI)** calcd for  $C_{23}H_{27}F_3O_4Na^+$   $[M+Na]^+$  447.1754, found 447.1753.

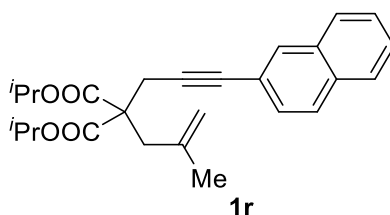

**Compound 1r.** (95% yield, 0.272 g, 0.669 mmol, a colorless solid, chromatography on silica gel, eluent: hexane/ethyl acetate (40/1),  $R_f = 0.4$  (hexane/ethyl acetate (20/1))).  $^1H$  NMR (600 MHz,  $CDCl_3$ ):  $\delta$  7.87 (s, 1H), 7.80–7.75 (m, 2H), 7.74 (d,  $J = 8.5$  Hz, 1H), 7.49–7.44 (m, 2H), 7.41 (d,  $J = 6.8$  Hz, 1H), 5.10 (hept,  $J = 6.2$  Hz, 2H), 4.95 (s, 2H), 3.08 (s, 2H), 2.92 (s, 2H), 1.74 (s, 3H), 1.27 (d,  $J = 6.4$  Hz, 12H);  $^{13}C$  NMR (151 MHz,  $CDCl_3$ ):  $\delta$  169.8, 140.3, 133.0, 132.6, 131.2, 128.6, 127.8, 127.7, 127.6, 126.4, 120.7, 116.2, 85.4, 83.9, 69.2, 56.7, 39.5, 23.6, 23.4, 21.60, 21.56. **HRMS (ESI)** calcd for  $C_{26}H_{30}O_4Na^+$   $[M+Na]^+$  429.2036, found 429.2041.

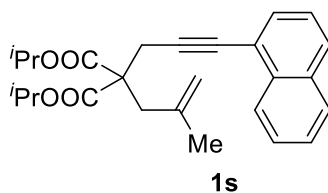

**Compound 1s.** (95% yield, 0.272 g, 0.669 mmol, a colorless solid, chromatography on silica gel, eluent: hexane/ethyl acetate (40/1),  $R_f = 0.4$  (hexane/ethyl acetate (20/1))).



$^1\text{H NMR}$  (600 MHz,  $\text{CDCl}_3$ ):  $\delta$  8.30 (d,  $J = 8.3$  Hz, 1H), 7.82 (d,  $J = 8.1$  Hz, 1H), 7.79 (d,  $J = 8.3$  Hz, 1H), 7.60 (d,  $J = 7.3$  Hz, 1H), 7.55 (t,  $J = 6.8$  Hz, 1H), 7.50 (t,  $J = 6.8$  Hz, 1H), 7.39 (t,  $J = 8.1$  Hz, 1H), 5.11 (hept,  $J = 6.3$  Hz, 2H), 4.95 (s, 2H), 3.20 (s, 2H), 2.97 (s, 2H), 1.75 (s, 3H), 1.26 (d,  $J = 6.3$  Hz, 12H);  $^{13}\text{C NMR}$  (151 MHz,  $\text{CDCl}_3$ ):  $\delta$  169.9, 140.3, 133.4, 133.1, 130.4, 128.3, 128.1, 126.6, 126.28, 126.26, 125.1, 121.1, 116.2, 89.9, 81.6, 69.2, 56.7, 39.6, 23.9, 23.5, 21.61, 21.57. **HRMS (ESI)** calcd for  $\text{C}_{26}\text{H}_{30}\text{O}_4\text{Na}^+$   $[\text{M}+\text{Na}]^+$  429.2036, found 429.2044.

#### 4. A Typical Procedure for Ni-Catalyzed Cascade Cyclization of 1,6-Enynes with $\text{ArB}(\text{OH})_2$ (Table 1, entry 1).

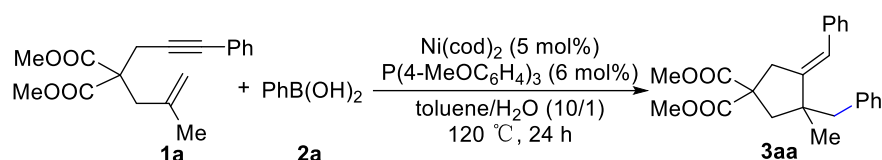

An oven-dried Schlenk tube equipped with a stir bar was charged with **1a** (30.0 mg, 0.100 mmol) and phenylboronic acid (36.6 mg, 0.300 mmol).  $\text{Ni}(\text{cod})_2$  (1.38 mg, 5.00  $\mu\text{mol}$ , 5.0 mol% of Ni),  $\text{P}(4\text{-MeOC}_6\text{H}_4)_3$  (2.11 mg, 6.00  $\mu\text{mol}$ , 6.0 mol%), toluene (1.0 mL), and  $\text{H}_2\text{O}$  (0.1 mL) were added to the mixture at room temperature in an argon-filled glovebox. Then the reaction was stirred at  $120\text{ }^\circ\text{C}$  for 24 h. The mixture was passed through a short silica gel pad with ethyl acetate as eluent. The solvent was removed on a rotary evaporator. The crude product was subjected to chromatography on silica gel with hexane/ethyl acetate (40/1) as eluent to give compound **3aa** (91% yield, 34.4 mg, 0.0910 mmol) as a colorless oil.

#### 5. Synthetic Manipulations.

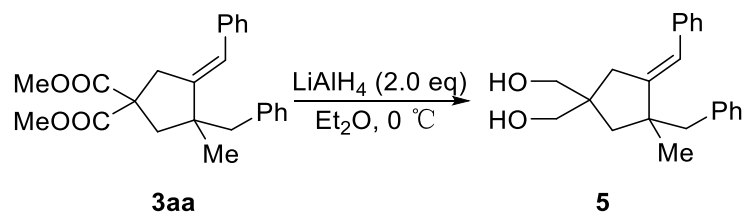

A solution of **3aa** (60.0 mg, 0.160 mmol) in ethyl ether (2.0 mL) was added  $\text{LiAlH}_4$

(12.0 mg, 0.320 mmol) slowly at 0 °C. Then the resulting mixture was warmed to room temperature and stirred for 12 h. The reaction mixture was quenched by saturated potassium sodium tartrate and extracted with ethyl acetate. The combined organic layers were dried over MgSO<sub>4</sub> and filtered. The solvent was removed, and the residue was purified by flash column chromatography on silica gel (hexane/ethyl acetate = 8:1) to give compound **5** as a colorless oil (92% yield, 47.5 mg, 0.147 mmol). *R<sub>f</sub>* = 0.3 (hexane/ethyl acetate (3/1)).

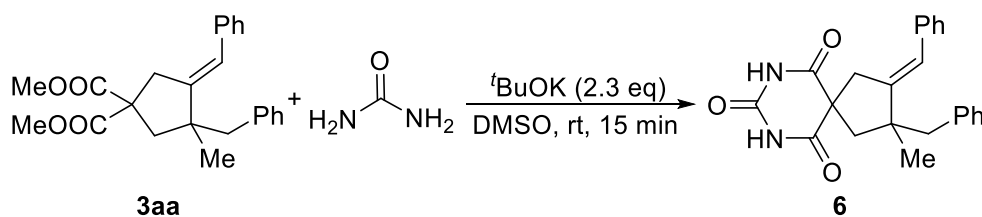

Urea (39.6 mg, 66.0 μmol) and <sup>t</sup>BuOK (11.2 mg, 0.284 mmol) was added to a solution of compound **3aa** (40.0 mg, 0.110 mmol) in dry DMSO (2.0 mL) was added. The mixture was stirred at room temperature for 15 min, diluted with ethyl acetate (10 mL), and washed with a HCl solution (0.1 N, 5.0 mL). The aqueous phase was extracted with ethyl acetate, washed with brine, and dried over MgSO<sub>4</sub>. The solvent was removed and the residue was purified by flash column chromatography on silica gel (hexane/ethyl acetate = 20:1) to give compound **6** as a white solid (95% yield, 39.1 mg, 0.105 mmol). *R<sub>f</sub>* = 0.3 (hexane/ethyl acetate (10/1)).

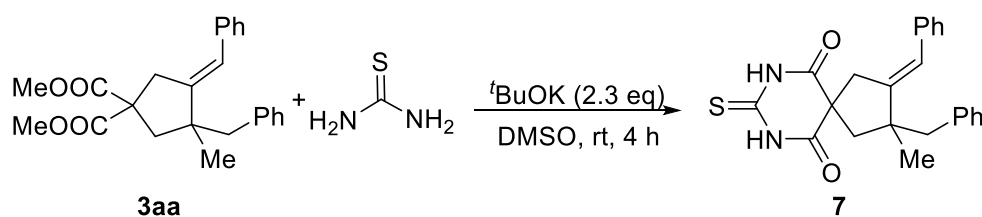

Thiourea (24.1 mg, 0.320 mmol) and <sup>t</sup>BuOK (13.7 mg, 0.122 mmol) was added to a solution of compound **3aa** (20.0 mg, 53.0 μmol) in dry DMSO (1.0 mL) was added. The mixture was stirred at room temperature for 15 min, diluted with ethyl acetate (5 mL), and washed with a HCl solution (0.1 N, 5 mL). The aqueous phase was extracted with ethyl acetate, washed with brine, and dried over MgSO<sub>4</sub>. The solvent was removed and the residue was purified by flash column chromatography on silica gel (hexane/ethyl acetate = 20:1) to give compound **7** as a white solid (98% yield, 20.3 mg,

51.9  $\mu\text{mol}$ ).  $R_f = 0.3$  (hexane/ethyl acetate (10/1)).

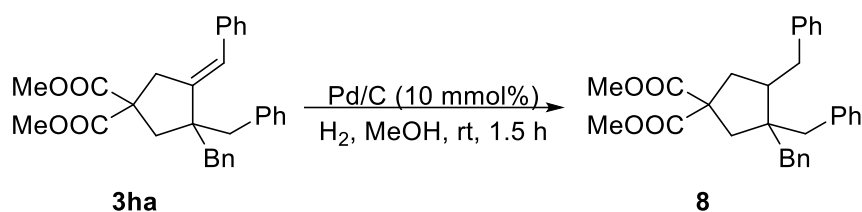

10% Pd/C (5.65 mg) was added to a solution of compound **3ha** (20.0 mg, 53.0  $\mu\text{mol}$ ) in dry MeOH (2.0 ml). The mixture was stirred under  $\text{H}_2$  atmosphere (using  $\text{H}_2$  balloon) at room temperature for 1.5 h. The solvent was removed, and the residue was purified by flash column chromatography on silica gel (hexane/ethyl acetate = 20:1) to give compound **8** as a white solid (94% yield, 22.7 mg, 49.7  $\mu\text{mol}$ ).  $R_f = 0.3$  (hexane/ethyl acetate (10/1)).

## 6. Mechanism Studies

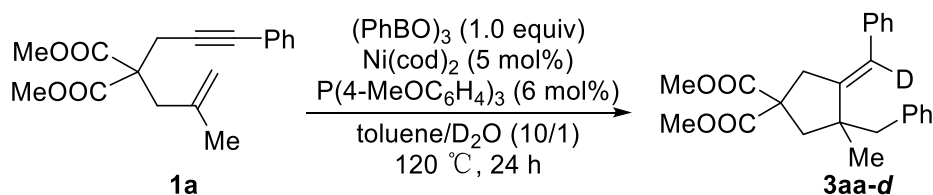

An oven-dried Schlenk flask equipped with a stir bar was charged with **1a** (30.0 mg, 0.100 mmol) and  $(\text{PhBO})_3$  (31.2 mg, 0.100 mmol).  $\text{Ni}(\text{cod})_2$  (1.38 mg, 5.00  $\mu\text{mol}$ , 5.0 mol% of Ni),  $\text{P}(4\text{-MeOC}_6\text{H}_4)_3$  (2.11 mg, 6.00  $\mu\text{mol}$ , 6.0 mol%), toluene (1.0 mL) and  $\text{D}_2\text{O}$  (0.1 mL) were added to the mixture at room temperature in an argon-filled glovebox. Then the reaction was stirred at 120  $^\circ\text{C}$  for 24 h. The mixture was passed through a short silica gel pad with ethyl acetate as eluent. The solvent was removed on a rotary evaporator. The crude product was subjected to chromatography on silica gel with hexane/ethyl acetate (40/1) as eluent to give compound **3aa-d** (83% yield, 31.5 mg, 0.0830 mmol) as a colorless oil.

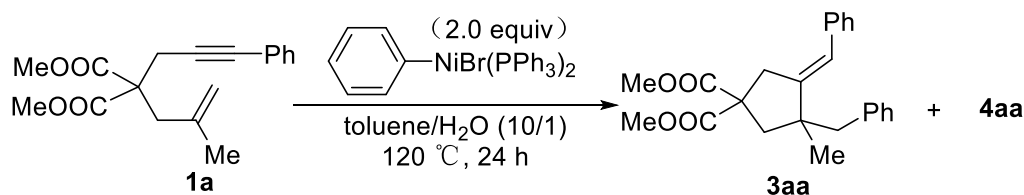

An oven-dried Schlenk tube equipped with a stir bar was charged with **1a** (30.0 mg,

0.100 mmol). Aryl-Ni(II) complex (3.70 mg, 5.00  $\mu\text{mol}$ ), toluene (1.0 mL) and  $\text{H}_2\text{O}$  (0.1 mL) were added to the mixture at room temperature in an argon-filled glovebox. Then the reaction was stirred at 120  $^\circ\text{C}$  for 24 h. The mixture was passed through a short silica gel pad with ethyl acetate as eluent. The solvent was removed on a rotary evaporator.

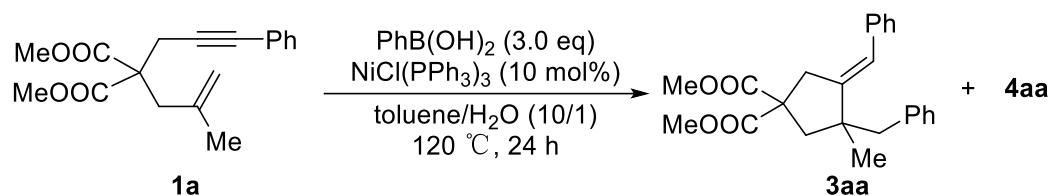

The Ni(I) precursor  $(\text{PPh}_3)_3\text{NiCl}$  was synthesized by comproportionation of  $\text{Ni}(\text{PPh}_3)_4$  and  $(\text{PPh}_3)_2\text{NiCl}_2$  in ethyl ether according to Heimbach.<sup>9</sup> Or to a scintillation vial was added  $\text{Ni}(\text{cod})_2$  (0.100 g, 0.364 mmol) and  $\text{NiCl}_2(\text{dme})$  (79.9 mg, 0.364 mmol.) as solids, followed by 5.0 mL of toluene. To this solution was added  $\text{PPh}_3$  (573 mg, 2.18 mmol) dissolved in 3.0 mL toluene and the reaction mixture was stirred rt for 12 h before being filtered through Celite. The filtrate was concentrated in vacuo to a volume of 2.0 mL, layered with hexanes, and cooled to  $-30$   $^\circ\text{C}$  to afford a yellow crystalline solid  $\text{NiCl}(\text{PPh}_3)_3$  (74% yield, 77.9 mg, 0.269 mmol).<sup>10</sup>

An oven-dried Schlenk tube equipped with a stir bar was charged with **1a** (30.0 mg, 0.100 mmol) and phenylboronic acid **2a** (36.6 mg, 0.300 mmol).  $\text{NiCl}(\text{PPh}_3)_3$  (8.81 mg, 10.0  $\mu\text{mol}$ , 10 mol% of Ni), toluene (1.0 mL) and  $\text{H}_2\text{O}$  (0.1 mL) were added to the mixture at room temperature in an argon-filled glovebox. Then the reaction was stirred at 120  $^\circ\text{C}$  for 24 h. The crude product was subjected to chromatography on silica gel with hexane/ethyl acetate (40/1) as eluent to give compound **3aa** (76% yield, 28.8 mg, 0.0500 mmol) as a colorless oil.

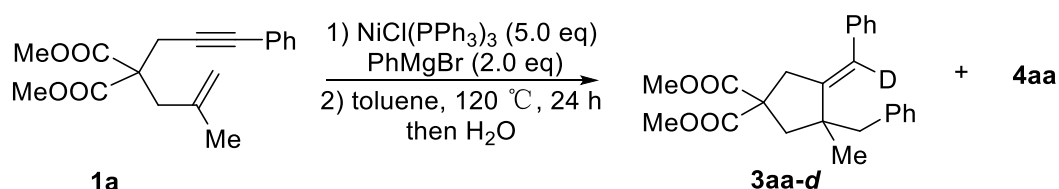

To a dry Schlenk tube was added  $\text{NiCl}(\text{PPh}_3)_3$  (0.500 mmol, 145 mg), which was dissolved in 500  $\mu\text{L}$  of toluene. The appropriate arylmagnesium bromide Grignard reagent (2.0 equiv, 0.200 mmol) was added to the mixture.

An oven-dried Schlenk tube equipped with a stir bar was charged with **1a** (30.0 mg, 0.100 mmol). Grignard-reagent-Ni(I) complex and toluene (1.0 mL) were added to the Schlenk tube at room temperature in an argon-filled glovebox. Then the reaction was stirred at 120 °C for 24 h. The reaction quenched with H<sub>2</sub>O (0.1 mL). The crude product was subjected to chromatography on silica gel with hexane/ethyl acetate (40/1) as eluent to give compound **3aa-d** (21% yield, 7.97 mg, 0.0210 mmol) as a colorless oil.

## 7. Characterization of the Products

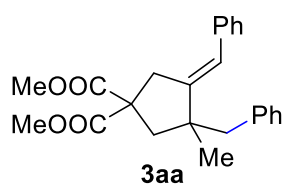

**Compound 3aa.** (Table 1, entry 1, 91% yield, 34.4 mg, 91.0 μmol, a colorless oil, chromatography on silica gel, eluent: hexane/ethyl acetate (40/1),  $R_f$  = 0.4 (hexane/ethyl acetate (20/1)). The ee was measured by HPLC (Chiralpak IH column, 0.5 mL/min, hexane/2-propanol = 99/1, 230 nm,  $t_{\text{minor}}$  = 17.3 min,  $t_{\text{major}}$  = 20.1 min);  $[\alpha]_D^{25} +1.02$  (c 0.850, CHCl<sub>3</sub>) for 22% ee. **<sup>1</sup>H NMR** (600 MHz, CDCl<sub>3</sub>): δ 7.34 (t,  $J$  = 7.7 Hz, 2H), 7.28–7.24 (m, 4H), 7.24–7.19 (m, 2H), 7.17 (d,  $J$  = 6.7 Hz, 2H), 6.11 (t,  $J$  = 2.5 Hz, 1H), 3.74 (s, 3H), 3.67 (s, 3H), 3.38 (d,  $J$  = 17.9 Hz, 1H), 3.20 (dd,  $J$  = 17.1, 2.8 Hz, 1H), 2.73 (s, 2H), 2.58 (d,  $J$  = 13.8 Hz, 1H), 2.22 (d,  $J$  = 13.2 Hz, 1H), 1.15 (s, 3H); **<sup>13</sup>C NMR** (151 MHz, CDCl<sub>3</sub>): δ 172.6, 172.4, 148.8, 138.4, 137.8, 130.7, 128.5, 128.2, 127.8, 126.3, 126.2, 122.3, 58.4, 52.9, 52.8, 47.9, 47.4, 44.7, 39.1, 27.0. **HRMS (ESI)** calcd for C<sub>24</sub>H<sub>26</sub>O<sub>4</sub>Na<sup>+</sup> [M+Na]<sup>+</sup> 401.1723, found 401.1738.

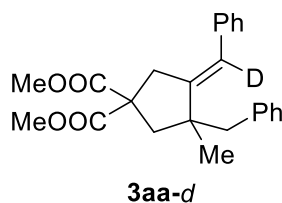

**Compound 3aa-d.** (Fig 3 (a), 83% yield, 31.5 mg, 83.0 μmol, a colorless oil, chromatography on silica gel, eluent: hexane/ethyl acetate (40/1),  $R_f$  = 0.4 (hexane/ethyl acetate (20/1)). **<sup>1</sup>H NMR** (600 MHz, CDCl<sub>3</sub>): δ 7.34 (t,  $J$  = 7.7 Hz, 2H), 7.29–7.24 (m,

4H), 7.24–7.20 (m, 2H), 7.18 (d,  $J = 6.7$  Hz, 2H), 3.74 (s, 3H), 3.68 (s, 3H), 3.39 (d,  $J = 17.1$  Hz, 1H), 3.21 (d,  $J = 17.1$  Hz, 1H), 2.73 (s, 2H), 2.58 (d,  $J = 13.8$  Hz, 1H), 2.22 (d,  $J = 13.8$  Hz, 1H), 1.16 (s, 3H);  $^{13}\text{C NMR}$  (151 MHz,  $\text{CDCl}_3$ ):  $\delta$  172.6, 172.5, 148.8, 138.4, 137.8, 130.7, 128.5, 128.2, 127.8, 126.3, 126.3, 58.5, 52.9, 52.8, 47.9, 47.5, 44.8, 39.1, 27.3;  $^2\text{H NMR}$  (92 MHz,  $\text{CDCl}_3$ ):  $\delta$  6.12 (s, 1H). **HRMS (ESI)** calcd for  $\text{C}_{24}\text{H}_{25}\text{DO}_4\text{Na}^+$   $[\text{M}+\text{Na}]^+$  402.1786, found 402.1791.

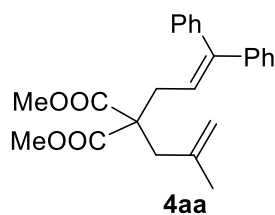

**Compound 4aa.** (Table 1, entry 2, 31% yield, 11.7 mg, 31.0  $\mu\text{mol}$ , a colorless oil, chromatography on silica gel, eluent: hexane/ethyl acetate (40/1),  $R_f = 0.4$  (hexane/ethyl acetate (20/1))).  $^1\text{H NMR}$  (600 MHz,  $\text{CDCl}_3$ ):  $\delta$  7.35 (t,  $J = 7.5$  Hz, 2H), 7.30 (t,  $J = 7.4$  Hz, 1H), 7.29–7.20 (m, 3H), 7.18 (d,  $J = 6.5$  Hz, 2H), 7.13 (d,  $J = 8.0$  Hz, 2H), 5.90 (t,  $J = 7.2$  Hz, 1H), 4.77 (s, 1H), 4.64 (s, 1H), 3.67 (s, 6H), 2.82 (d,  $J = 7.3$  Hz, 2H), 2.76 (s, 2H), 1.57 (s, 3H);  $^{13}\text{C NMR}$  (151 MHz,  $\text{CDCl}_3$ ):  $\delta$  171.6, 145.0, 142.9, 140.3, 139.5, 129.9, 128.1, 127.6, 127.2, 123.1, 115.7, 57.5, 52.4, 40.5, 32.4, 23.2. **HRMS (ESI)** calcd for  $\text{C}_{24}\text{H}_{26}\text{O}_4\text{Na}^+$   $[\text{M}+\text{Na}]^+$  401.1723, found 401.1728.

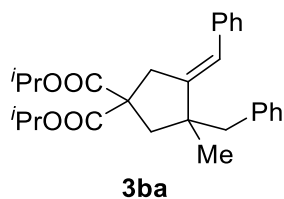

**Compound 3ba.** (Table 2, entry 2, 97% yield, 42.2 mg, 97.1  $\mu\text{mol}$ , a colorless oil, chromatography on silica gel, eluent: hexane/ethyl acetate (40/1),  $R_f = 0.4$  (hexane/ethyl acetate (20/1))).  $^1\text{H NMR}$  (500 MHz,  $\text{CDCl}_3$ ):  $\delta$  7.33 (t,  $J = 7.6$  Hz, 2H), 7.29–7.24 (m, 4H), 7.24–7.17 (m, 4H), 6.08 (t,  $J = 2.4$  Hz, 1H), 5.04 (hept,  $J = 6.3$  Hz, 1H), 4.97 (hept,  $J = 6.3$  Hz, 1H), 3.33 (d,  $J = 16.9$  Hz, 1H), 3.11 (dd,  $J = 16.9, 2.8$  Hz, 1H), 2.74 (s, 2H), 2.54 (d,  $J = 13.9$  Hz, 1H), 2.19 (d,  $J = 13.8$  Hz, 1H), 1.24 (d,  $J = 6.3$  Hz, 3H), 1.21 (d,  $J = 6.1$  Hz, 3H), 1.18 (d,  $J = 6.3$  Hz, 3H), 1.17 (s, 3H), 1.13 (d,  $J = 6.2$  Hz, 3H);  $^{13}\text{C NMR}$  (126 MHz,  $\text{CDCl}_3$ ):  $\delta$  171.7, 171.5, 149.1, 138.5, 138.0, 130.7, 128.5, 128.1,

127.7, 126.19, 126.16, 122.2, 69.1, 68.9, 58.6, 48.1, 47.3, 44.5, 38.8, 27.0, 21.53, 21.51, 21.44, 21.40. **HRMS (ESI)** calcd for  $C_{28}H_{34}O_4Na^+$   $[M+Na]^+$  457.2349, found 457.2454.

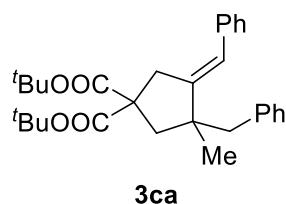

**Compound 3ca.** (Table 2, entry 3, entry 95% yield, 43.9 mg, 94.9  $\mu$ mol, a colorless oil, chromatography on silica gel, eluent: hexane/ethyl acetate (40/1),  $R_f$ = 0.4 (hexane/ethyl acetate (20/1))).  **$^1H$  NMR** (600 MHz,  $CDCl_3$ ):  $\delta$  7.33 (t,  $J$  = 7.5 Hz, 2H), 7.28–7.24 (m, 4H), 7.24–7.18 (m, 4H), 6.05 (t,  $J$  = 2.5 Hz, 1H), 3.27 (d,  $J$  = 16.2 Hz, 1H), 3.05 (d,  $J$  = 16.9 Hz, 1H), 2.76 (d,  $J$  = 13.1 Hz, 1H), 2.73 (d,  $J$  = 13.1 Hz, 1H), 2.50 (d,  $J$  = 13.8 Hz, 1H), 2.13 (d,  $J$  = 13.8 Hz, 1H), 1.45 (s, 9H), 1.37 (s, 9H), 1.17 (s, 3H);  **$^{13}C$  NMR** (126 MHz,  $CDCl_3$ ):  $\delta$  171.4, 171.2, 149.4, 138.7, 138.1, 130.7, 128.5, 128.1, 127.7, 126.1, 122.1, 81.4, 81.2, 59.9, 48.1, 47.3, 44.7, 38.8, 27.8, 27.7, 26.9. **HRMS (ESI)** calcd for  $C_{30}H_{38}O_4Na^+$   $[M+Na]^+$  485.2662, found 485.2667.

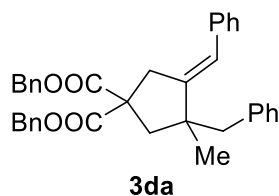

**Compound 3da.** (Table 2, entry 4, 86% yield, 45.6 mg, 85.9  $\mu$ mol, a colorless oil, chromatography on silica gel, eluent: hexane/ethyl acetate (40/1),  $R_f$ = 0.4 (hexane/ethyl acetate (20/1))).  **$^1H$  NMR** (600 MHz,  $CDCl_3$ ):  $\delta$  7.36–7.28 (m, 5H), 7.26–7.18 (m, 11H), 7.16–7.11 (m, 4H), 6.12 (t,  $J$  = 2.4 Hz, 1H), 5.17–4.97 (m, 4H), 3.39 (dd,  $J$  = 16.9, 2.0 Hz, 1H), 3.18 (dd,  $J$  = 16.9, 2.8 Hz, 1H), 2.71 (s, 2H), 2.58 (d,  $J$  = 13.9 Hz, 1H), 2.26 (d,  $J$  = 13.8 Hz, 1H), 1.15 (s, 3H);  **$^{13}C$  NMR** (151 MHz,  $CDCl_3$ ):  $\delta$  171.8, 171.6, 148.8, 138.4, 137.8, 135.3, 130.7, 128.6, 128.5, 128.4, 128.3, 128.22, 128.20, 128.0, 127.9, 127.8, 126.3, 126.2, 122.5, 67.34, 67.25, 58.7, 48.1, 47.4, 44.5, 39.0, 27.1. **HRMS (ESI)** calcd for  $C_{36}H_{34}O_4Na^+$   $[M+Na]^+$  553.2349, found 553.2354.

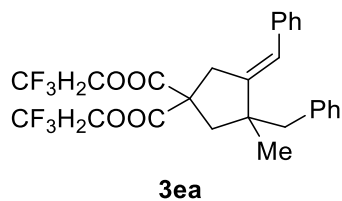

**Compound 3ea.** (Table 2, entry 5, 88% yield, 45.3 mg, 88.1  $\mu\text{mol}$ , a colorless oil, chromatography on silica gel, eluent: hexane/ethyl acetate (30/1),  $R_f=0.4$  (hexane/ethyl acetate (15/1))).  $^1\text{H NMR}$  (600 MHz,  $\text{CDCl}_3$ ):  $\delta$  7.35 (t,  $J=7.7$  Hz, 2H), 7.30–7.21 (m, 6H),  $\delta$  7.16 (d,  $J=6.9$  Hz, 2H), 6.18 (t,  $J=2.5$  Hz, 1H), 4.57–4.37 (m, 4H), 3.38 (d,  $J=16.5$  Hz, 1H), 3.09 (dd,  $J=16.9, 2.9$  Hz, 1H), 2.76 (s, 2H), 2.63 (d,  $J=14.1$  Hz, 1H), 2.30 (d,  $J=14.0$  Hz, 1H), 1.22 (s, 3H);  $^{13}\text{C NMR}$  (151 MHz,  $\text{CDCl}_3$ ):  $\delta$  169.9, 169.8, 147.2, 138.0, 137.5, 130.6, 128.5, 128.3, 127.9, 126.6, 126.5, 123.3, 122.53 (q,  $J=277.4$  Hz), 122.49 (q,  $J=277.7$  Hz), 61.3 (q,  $J=37.4$  Hz), 61.3 (q,  $J=37.0$  Hz), 58.1, 48.3, 47.4, 44.5, 39.0, 27.2.  $^{19}\text{F}\{^1\text{H}\}$  NMR (565 MHz,  $\text{CDCl}_3$ ):  $-74.2$  (s, 3F),  $-74.3$  (s, 3F). **HRMS (ESI)** calcd for  $\text{C}_{26}\text{H}_{24}\text{F}_6\text{O}_4\text{Na}^+$   $[\text{M}+\text{Na}]^+$  537.1471, found 537.1476.

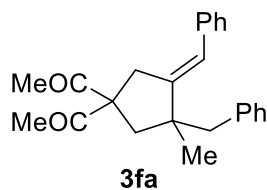

**Compound 3fa.** (Table 2, entry 6, 76% yield, 26.3 mg, 75.9  $\mu\text{mol}$ , a colorless oil, chromatography on silica gel, eluent: hexane/ethyl acetate (40/1),  $R_f=0.4$  (hexane/ethyl acetate (20/1))).  $^1\text{H NMR}$  (600 MHz,  $\text{CDCl}_3$ ):  $\delta$  7.36 (t,  $J=7.6$  Hz, 2H), 7.27 (d,  $J=7.6$  Hz, 3H), 7.25–7.20 (m, 3H), 7.16 (d,  $J=7.4$  Hz, 2H), 6.12 (s, 1H), 3.29 (d,  $J=17.0$  Hz, 1H), 3.00 (dd,  $J=17.0, 2.8$  Hz, 1H), 2.68 (s, 2H), 2.44 (d,  $J=13.8$  Hz, 1H), 2.15 (d,  $J=14.1$  Hz, 1H), 2.07 (s, 3H), 2.02 (s, 3H), 1.15 (s, 3H);  $^{13}\text{C NMR}$  (151 MHz,  $\text{CDCl}_3$ ):  $\delta$  205.4, 205.3, 148.5, 138.3, 137.7, 130.6, 128.6, 128.3, 127.8, 126.5, 126.3, 122.5, 73.4, 48.0, 47.5, 42.1, 35.8, 26.9, 26.6, 26.3. **HRMS (ESI)** calcd for  $\text{C}_{24}\text{H}_{26}\text{O}_2\text{Na}^+$   $[\text{M}+\text{Na}]^+$  369.1825, found 369.1830.

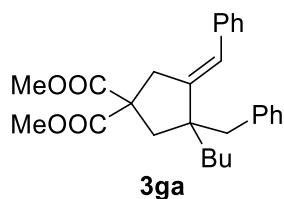



**Compound 3ga.** (Table 2, entry 7, 91% yield, 38.3 mg, 91.1  $\mu\text{mol}$ , a colorless oil, chromatography on silica gel, eluent: hexane/ethyl acetate (50/1),  $R_f = 0.4$  (hexane/ethyl acetate (25/1))).  $^1\text{H NMR}$  (500 MHz,  $\text{CDCl}_3$ ):  $\delta$  7.34 (t,  $J = 7.7$  Hz, 2H), 7.28–7.19 (m, 6H), 7.19–7.14 (m, 2H), 5.98 (t,  $J = 2.5$  Hz, 1H), 3.72 (s, 3H), 3.70 (s, 3H), 3.30–3.16 (m, 2H), 2.76 (d,  $J = 13.3$  Hz, 1H), 2.73 (d,  $J = 13.3$  Hz, 1H), 2.55 (d,  $J = 14.1$  Hz, 1H), 2.34 (d,  $J = 14.1$  Hz, 1H), 1.51–1.28 (m, 6H), 0.91 (t,  $J = 7.0$  Hz, 3H);  $^{13}\text{C NMR}$  (126 MHz,  $\text{CDCl}_3$ ):  $\delta$  172.7, 172.6, 147.4, 138.3, 137.9, 130.8, 128.6, 128.2, 127.7, 126.3, 126.2, 122.9, 58.3, 52.9, 52.8, 50.8, 45.1, 42.1, 39.5, 38.2, 26.6, 23.3, 14.1. **HRMS (ESI)** calcd for  $\text{C}_{27}\text{H}_{32}\text{O}_4\text{Na}^+$   $[\text{M}+\text{Na}]^+$  443.2193, found 443.2196.

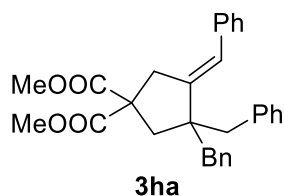

**Compound 3ha.** (Table 2, entry 8, 97% yield, 44.1 mg, 97.0  $\mu\text{mol}$ , a colorless oil, chromatography on silica gel, eluent: hexane/ethyl acetate (50/1),  $R_f = 0.4$  (hexane/ethyl acetate (25/1))).  $^1\text{H NMR}$  (600 MHz,  $\text{CDCl}_3$ ):  $\delta$  7.36 (t,  $J = 7.6$  Hz, 2H), 7.31–7.22 (m, 13H), 6.36 (t,  $J = 2.5$  Hz, 1H), 3.63 (s, 6H), 2.89 (d,  $J = 13.2$  Hz, 2H), 2.85–2.79 (m, 4H), 2.52 (s, 2H);  $^{13}\text{C NMR}$  (151 MHz,  $\text{CDCl}_3$ ):  $\delta$  172.2, 147.8, 138.1, 137.8, 131.1, 128.6, 128.3, 127.9, 126.42, 126.35, 123.7, 58.6, 52.7, 51.3, 46.5, 40.3, 39.0; **HRMS (ESI)** calcd for  $\text{C}_{30}\text{H}_{30}\text{O}_4\text{Na}^+$   $[\text{M}+\text{Na}]^+$  477.2036, found 477.2041. The structure of **3ha** was confirmed by single crystal X-ray diffraction (Section 8).

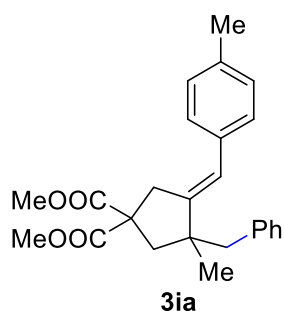

**Compound 3ia.** (Table 2, entry 9, 85% yield, 33.4 mg, 85.0  $\mu\text{mol}$ , a colorless oil, chromatography on silica gel, eluent: hexane/ethyl acetate (50/1),  $R_f = 0.4$  (hexane/ethyl acetate (25/1))).  $^1\text{H NMR}$  (600 MHz,  $\text{CDCl}_3$ ):  $\delta$  7.25 (t,  $J = 7.5$  Hz, 2H), 7.22 (d,  $J = 7.0$  Hz, 1H), 7.19–7.14 (m, 6H), 6.08 (t,  $J = 2.6$  Hz, 1H), 3.74 (s, 3H), 3.67 (s, 3H), 3.37

(dd,  $J = 17.1, 2.1$  Hz, 1H), 3.20 (dd,  $J = 17.1, 2.9$  Hz, 1H), 2.72 (s, 2H), 2.57 (d,  $J = 13.8$  Hz, 1H), 2.35 (s, 3H), 2.22 (d,  $J = 13.8$  Hz, 1H), 1.15 (s, 3H);  $^{13}\text{C NMR}$  (151 MHz,  $\text{CDCl}_3$ ):  $\delta$  172.7, 172.5, 147.9, 138.5, 136.0, 135.0, 130.7, 128.9, 128.5, 127.8, 126.2, 122.2, 58.4, 52.9, 52.8, 47.9, 47.4, 44.8, 39.1, 27.0, 21.1. **HRMS (ESI)** calcd for  $\text{C}_{25}\text{H}_{28}\text{O}_4\text{Na}^+$   $[\text{M}+\text{Na}]^+$  415.1880, Found 415.1885.

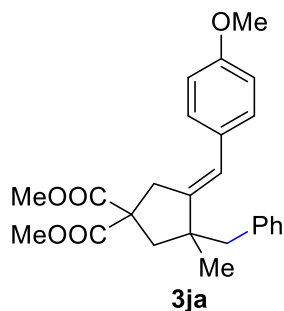

**Compound 3ja.** (Table 2, entry 10, 87% yield, 35.5 mg, 87.0  $\mu\text{mol}$ , a colorless oil, chromatography on silica gel, eluent: hexane/ethyl acetate (50/1),  $R_f = 0.4$  (hexane/ethyl acetate (25/1))).  $^1\text{H NMR}$  (600 MHz,  $\text{CDCl}_3$ ):  $\delta$  7.25 (t,  $J = 9.7$  Hz, 2H), 7.21 (t,  $J = 9.0$  Hz, 3H), 7.17 (d,  $J = 7.1$  Hz, 2H), 6.88 (d,  $J = 8.7$  Hz, 2H), 6.05 (t,  $J = 2.5$  Hz, 1H), 3.82 (s, 3H), 3.74 (s, 3H), 3.67 (s, 3H), 3.35 (dd,  $J = 17.0, 2.1$  Hz, 1H), 3.18 (dd,  $J = 17.0, 2.7$  Hz, 1H), 2.71 (s, 2H), 2.57 (d,  $J = 13.8$  Hz, 1H), 2.20 (d,  $J = 13.8$  Hz, 1H), 1.14 (s, 3H);  $^{13}\text{C NMR}$  (151 MHz,  $\text{CDCl}_3$ ):  $\delta$  172.7, 172.6, 158.1, 146.8, 138.5, 130.7, 130.6, 129.7, 127.8, 126.2, 121.7, 113.7, 58.5, 55.3, 52.9, 52.8, 48.0, 47.4, 44.8, 39.1, 27.0. **HRMS (ESI)** calcd for  $\text{C}_{25}\text{H}_{28}\text{O}_5\text{Na}^+$   $[\text{M}+\text{Na}]^+$  431.1829, Found 431.1834.

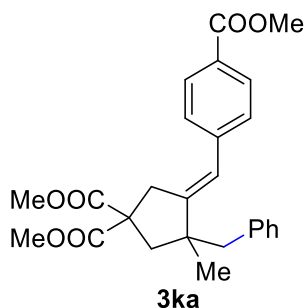

**Compound 3ka.** (Table 2, entry 11, 82% yield, 35.8 mg, 82.0  $\mu\text{mol}$ , a colorless oil, chromatography on silica gel, eluent: hexane/ethyl acetate (50/1),  $R_f = 0.4$  (hexane/ethyl acetate (25/1))).  $^1\text{H NMR}$  (600 MHz,  $\text{CDCl}_3$ ):  $\delta$  8.00 (d,  $J = 8.4$  Hz, 2H), 7.31 (d,  $J = 8.0$  Hz, 2H), 7.27 (t,  $J = 7.8$  Hz, 2H), 7.23 (d,  $J = 7.1$  Hz, 1H), 7.16 (d,  $J = 8.1$  Hz, 2H), 6.13 (t,  $J = 2.5$  Hz, 1H), 3.92 (s, 3H), 3.75 (s, 3H), 3.68 (s, 3H), 3.38 (d,  $J = 16.5$  Hz,

1H), 3.20 (dd,  $J = 17.2, 2.8$  Hz, 1H), 2.73 (s, 2H), 2.60 (d,  $J = 13.8$  Hz, 1H), 2.23 (d,  $J = 13.9$  Hz, 1H), 1.16 (s, 3H);  $^{13}\text{C}$  NMR (151 MHz,  $\text{CDCl}_3$ ):  $\delta$  172.4, 172.3, 167.0, 151.7, 142.5, 138.1, 130.7, 129.6, 128.4, 127.8, 126.4, 121.8, 58.4, 53.0, 52.9, 52.0, 47.9, 47.8, 44.7, 39.3, 27.0. **HRMS (ESI)** calcd for  $\text{C}_{26}\text{H}_{28}\text{O}_6\text{Na}^+$   $[\text{M}+\text{Na}]^+$  459.1778, Found 459.1787.

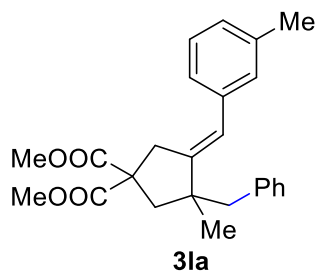

**Compound 3la.** (Table 2, entry 12, 86% yield, 33.8 mg, 86.0  $\mu\text{mol}$ , a colorless oil, chromatography on silica gel, eluent: hexane/ethyl acetate (50/1),  $R_f = 0.4$  (hexane/ethyl acetate (25/1))).  $^1\text{H}$  NMR (600 MHz,  $\text{CDCl}_3$ ):  $\delta$  7.28–7.25 (m, 2H), 7.24–7.20 (m, 2H), 7.18 (d,  $J = 7.4$  Hz, 2H), 7.08 (d,  $J = 5.8$  Hz, 2H), 7.03 (d,  $J = 7.5$  Hz, 1H), 6.09 (s, 1H), 3.75 (d,  $J = 1.4$  Hz, 3H), 3.68 (d,  $J = 1.4$  Hz, 3H), 3.39 (d,  $J = 17.1$  Hz, 1H), 3.21 (dd,  $J = 17.2, 2.8$  Hz, 1H), 2.73 (s, 2H), 2.58 (d,  $J = 13.8$  Hz, 1H), 2.37 (s, 3H), 2.21 (d,  $J = 13.8$  Hz, 1H), 1.15 (s, 3H);  $^{13}\text{C}$  NMR (151 MHz,  $\text{CDCl}_3$ ):  $\delta$  172.7, 172.5, 148.6, 138.5, 137.8, 137.7, 130.7, 129.3, 128.1, 127.8, 127.1, 126.2, 125.6, 122.4, 58.4, 52.9, 52.8, 47.9, 47.5, 44.8, 39.1, 27.0, 21.5. **HRMS (ESI)** calcd for  $\text{C}_{25}\text{H}_{28}\text{O}_4\text{Na}^+$   $[\text{M}+\text{Na}]^+$  415.1880, Found 415.1884.

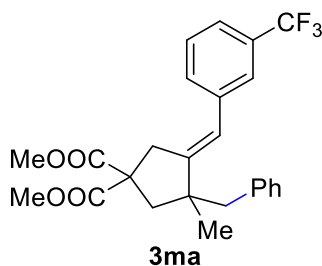

**Compound 3ma.** (Table 2, entry 13, 85% yield, 38.0 mg, 85.0  $\mu\text{mol}$ , a colorless oil, chromatography on silica gel, eluent: hexane/ethyl acetate (50/1),  $R_f = 0.4$  (hexane/ethyl acetate (25/1))).  $^1\text{H}$  NMR (600 MHz,  $\text{CDCl}_3$ ):  $\delta$  7.50–7.40 (m, 4H), 7.30–7.26 (m, 3H), 7.16 (d,  $J = 8.1$  Hz, 2H), 6.11 (t,  $J = 2.4$  Hz, 1H), 3.75 (s, 3H), 3.69 (s, 3H), 3.33 (d,  $J = 17.1$  Hz, 1H), 3.16 (dd,  $J = 17.0, 2.7$  Hz, 1H), 2.73 (s, 2H), 2.61 (d,  $J = 13.9$  Hz, 1H),

2.23 (d,  $J = 13.9$  Hz, 1H), 1.16 (s, 3H);  $^{13}\text{C NMR}$  (151 MHz,  $\text{CDCl}_3$ ):  $\delta$  172.4, 172.3, 151.0, 138.6, 138.1, 131.5, 130.645, 130.636 (q,  $J = 32.2$  Hz), 128.7, 127.8, 126.4, 124.2 (q,  $J = 272.5$  Hz), 125.2 (q,  $J = 3.8$  Hz), 123.0 (q,  $J = 4.0$  Hz), 121.2, 58.4, 52.9, 52.8, 47.9, 47.5, 44.8, 38.9, 27.0. **HRMS (ESI)** calcd for  $\text{C}_{25}\text{H}_{25}\text{F}_3\text{O}_4\text{Na}^+$   $[\text{M}+\text{Na}]^+$  469.1597, Found 469.1601.

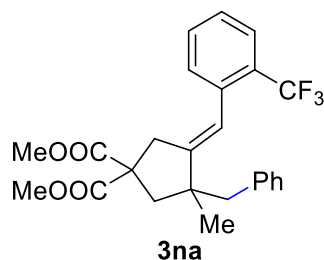

**Compound 3na.** (Table 2, entry 14, 83% yield, 37.1 mg, 83.0  $\mu\text{mol}$ , a colorless oil, chromatography on silica gel, eluent: hexane/ethyl acetate (50/1),  $R_f = 0.4$  (hexane/ethyl acetate (25/1))).  $^1\text{H NMR}$  (600 MHz,  $\text{CDCl}_3$ ):  $\delta$  7.64 (d,  $J = 7.8$  Hz, 1H), 7.51 (t,  $J = 7.6$  Hz, 1H), 7.36–7.31 (m, 2H), 7.31–7.27 (m, 2H), 7.25–7.21 (m, 3H), 6.42 (s, 1H), 3.71 (s, 3H), 3.63 (s, 3H), 3.06 (d,  $J = 16.6$  Hz, 1H), 2.88 (d,  $J = 16.7$  Hz, 1H), 2.77 (s, 2H), 2.61 (d,  $J = 14.0$  Hz, 1H), 2.20 (d,  $J = 13.9$  Hz, 1H), 1.19 (s, 3H);  $^{13}\text{C NMR}$  (151 MHz,  $\text{CDCl}_3$ ):  $\delta$  172.3, 172.2, 151.8, 138.3, 137.0, 131.5, 130.7, 130.6, 128.2 (q,  $J = 29.6$  Hz), 127.9, 126.6, 126.3, 125.7 (q,  $J = 5.5$  Hz), 124.5 (q,  $J = 273.4$  Hz), 119.1, 58.2, 52.8, 52.7, 48.0, 46.59, 44.6, 38.8, 27.2. **HRMS (ESI)** calcd for  $\text{C}_{25}\text{H}_{25}\text{F}_3\text{O}_4\text{Na}^+$   $[\text{M}+\text{Na}]^+$  469.1597, Found 469.1601.

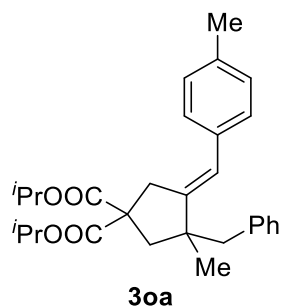

**Compound 3oa.** (Table 2, entry 15, 85% yield, 38.1 mg, 85.0  $\mu\text{mol}$ , a colorless oil, chromatography on silica gel, eluent: hexane/ethyl acetate (50/1),  $R_f = 0.4$  (hexane/ethyl acetate (25/1))).  $^1\text{H NMR}$  (600 MHz,  $\text{CDCl}_3$ ):  $\delta$  7.26 (t,  $J = 7.3$  Hz, 2H), 7.22 (d,  $J = 6.9$  Hz, 1H), 7.20–7.13 (m, 6H), 6.05 (s, 1H), 5.05 (hept,  $J = 6.3$  Hz, 1H), 4.98 (hept,  $J = 6.4$  Hz, 1H), 3.33 (d,  $J = 16.9$  Hz, 1H), 3.12 (d,  $J = 17.0$  Hz, 1H), 2.74 (s, 2H), 2.54

(d,  $J = 13.8$  Hz, 1H), 2.35 (s, 3H), 2.19 (d,  $J = 13.8$  Hz, 1H), 1.24 (d,  $J = 6.3$  Hz, 3H), 1.22 (d,  $J = 6.2$  Hz, 3H), 1.17 (s, 3H), 1.18 (d,  $J = 6.3$  Hz, 3H), 1.15 (d,  $J = 6.3$  Hz, 3H);  $^{13}\text{C}$  NMR (151 MHz,  $\text{CDCl}_3$ ):  $\delta$  171.8, 171.6, 148.2, 138.6, 135.8, 135.2, 130.7, 128.8, 128.4, 127.7, 126.1, 122.0, 69.0, 68.9, 58.6, 48.0, 47.3, 44.6, 38.8, 26.9, 21.5, 21.44, 21.41, 21.1. **HRMS (ESI)** calcd for  $\text{C}_{29}\text{H}_{36}\text{O}_5\text{Na}^+$   $[\text{M}+\text{Na}]^+$  471.2506, found 471.2511.

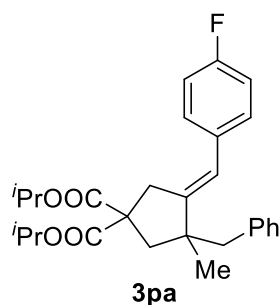

**Compound 3pa.** (Table 2, entry 16, 87% yield, 39.4 mg, 87.1  $\mu\text{mol}$ , a colorless oil, chromatography on silica gel, eluent: hexane/ethyl acetate (50/1),  $R_f = 0.4$  (hexane/ethyl acetate (25/1))).  $^1\text{H}$  NMR (600 MHz,  $\text{CDCl}_3$ ):  $\delta$  7.26 (t,  $J = 6.9$  Hz, 2H), 7.24–7.19 (m, 3H), 7.17 (d,  $J = 6.8$  Hz, 2H), 7.02 (t,  $J = 8.8$  Hz, 2H), 6.03 (s, 1H), 5.04 (hept,  $J = 6.2$  Hz, 1H), 4.97 (hept,  $J = 6.3$  Hz, 1H), 3.27 (d,  $J = 16.8$  Hz, 1H), 3.06 (dd,  $J = 16.8, 2.8$  Hz, 1H), 2.73 (s, 2H), 2.54 (d,  $J = 13.8$  Hz, 1H), 2.19 (d,  $J = 13.9$  Hz, 1H), 1.24 (d,  $J = 6.3$  Hz, 3H), 1.21 (d,  $J = 6.3$  Hz, 3H), 1.174 (d,  $J = 6.3$  Hz, 3H), 1.169 (s, 3H), 1.13 (d,  $J = 6.2$  Hz, 3H);  $^{13}\text{C}$  NMR (151 MHz,  $\text{CDCl}_3$ ):  $\delta$  171.6, 171.5, 161.3 (d,  $J = 245.7$  Hz), 148.9, 138.5, 134.1 (d,  $J = 3.3$  Hz), 130.7, 130.0 (d,  $J = 7.7$  Hz), 127.7, 126.2, 121.1, 115.0 (d,  $J = 21.3$  Hz), 69.1, 69.0, 58.6, 48.1, 47.3, 44.6, 38.7, 26.9, 21.5, 21.43, 21.39. **HRMS (ESI)** calcd for  $\text{C}_{28}\text{H}_{33}\text{FO}_4\text{Na}^+$   $[\text{M}+\text{Na}]^+$  475.2255, found 475.2262.

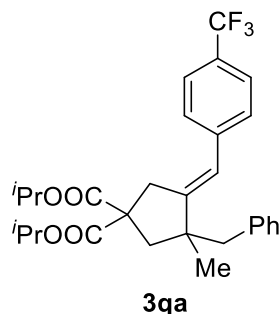

**Compound 3qa.** (Table 2, entry 17, 82% yield, 41.2 mg, 82.0  $\mu\text{mol}$ , a colorless oil, chromatography on silica gel, eluent: hexane/ethyl acetate (50/1),  $R_f = 0.4$  (hexane/ethyl acetate (25/1))).  $^1\text{H}$  NMR (600 MHz,  $\text{CDCl}_3$ ):  $\delta$  7.58 (d,  $J = 7.8$  Hz, 2H), 7.35 (d,  $J =$

8.0 Hz, 2H), 7.30–7.21 (m, 3H), 7.17 (d,  $J = 7.3$  Hz, 2H), 6.09 (s, 1H), 5.05 (hept,  $J = 6.3$  Hz, 1H), 4.98 (hept,  $J = 6.3$  Hz, 1H), 3.30 (d,  $J = 16.9$  Hz, 1H), 3.09 (d,  $J = 14.2$  Hz, 1H), 2.75 (s, 2H), 2.58 (d,  $J = 13.9$  Hz, 1H), 2.22 (d,  $J = 13.8$  Hz, 1H), 1.24 (d,  $J = 6.3$  Hz, 3H), 1.22 (d,  $J = 6.2$  Hz, 3H), 1.19 (s, 3H), 1.18 (d,  $J = 6.5$  Hz, 3H), 1.14 (d,  $J = 6.3$  Hz, 3H);  $^{13}\text{C}$  NMR (151 MHz,  $\text{CDCl}_3$ ):  $\delta$  171.5, 171.4, 152.0, 141.5, 138.3, 130.7, 128.6, 128.1 (q,  $J = 32.4$  Hz), 127.8, 126.3, 125.1 (q,  $J = 3.8$  Hz), 124.3 (q,  $J = 272.0$  Hz), 121.2, 69.2, 69.1, 58.6, 48.0, 47.5, 44.6, 38.9, 26.9, 21.5, 21.43, 21.39. **HRMS (ESI)** calcd for  $\text{C}_{29}\text{H}_{33}\text{F}_3\text{O}_4\text{Na}^+ [\text{M}+\text{Na}]^+$  525.2223, found 525.2225.

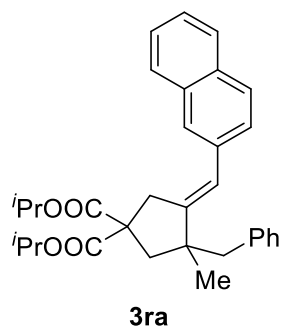

**Compound 3ra.** (Table 2, entry 18, 86% yield, 41.7 mg, 86.0  $\mu\text{mol}$ , a colorless oil, chromatography on silica gel, eluent: hexane/ethyl acetate (40/1),  $R_f = 0.4$  (hexane/ethyl acetate (20/1))).  $^1\text{H}$  NMR (600 MHz,  $\text{CDCl}_3$ ):  $\delta$  7.86–7.78 (m, 3H), 7.70 (s, 1H), 7.50–7.40 (m, 3H), 7.31–7.26 (m, 2H), 7.23 (d,  $J = 7.7$  Hz, 3H), 6.24 (s, 1H), 5.07 (hept,  $J = 6.2$  Hz, 1H), 4.98 (hept,  $J = 6.3$  Hz, 1H), 3.43 (d,  $J = 16.9$  Hz, 1H), 3.25 (d,  $J = 16.9$  Hz, 1H), 2.80 (s, 2H), 2.59 (d,  $J = 13.8$  Hz, 1H), 2.25 (d,  $J = 13.8$  Hz, 1H), 1.25 (d,  $J = 6.2$  Hz, 3H), 1.23 (s, 3H), 1.22 (d,  $J = 6.2$  Hz, 3H), 1.18 (d,  $J = 6.2$  Hz, 3H), 1.13 (d,  $J = 6.3$  Hz, 3H);  $^{13}\text{C}$  NMR (151 MHz,  $\text{CDCl}_3$ ):  $\delta$  171.7, 171.5, 149.7, 138.5, 135.6, 133.4, 132.0, 130.8, 127.9, 127.7, 127.6, 127.5, 127.12, 127.05, 126.2, 126.0, 125.5, 122.3, 69.1, 69.0, 58.7, 48.1, 47.5, 44.6, 39.0, 27.0, 21.5, 21.43, 21.41. **HRMS (ESI)** calcd for  $\text{C}_{32}\text{H}_{36}\text{O}_4\text{Na}^+ [\text{M}+\text{Na}]^+$  507.2506, found 507.2511.

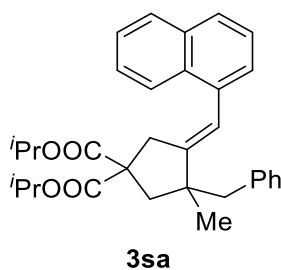

**Compound 3sa.** (Table 2, entry 19, 85% yield, 41.2 mg, 85.0  $\mu\text{mol}$ , colorless oil,

chromatography on silica gel, eluent: hexane/ethyl acetate (40/1),  $R_f = 0.4$  (hexane/ethyl acetate (20/1))).  **$^1\text{H NMR}$**  (600 MHz,  $\text{CDCl}_3$ ):  $\delta$  7.87 (d,  $J = 9.0$  Hz, 1H), 7.84 (d,  $J = 8.8$  Hz, 1H), 7.75 (d,  $J = 8.2$  Hz, 1H), 7.50–7.43 (m, 3H), 7.39 (d,  $J = 7.0$  Hz, 1H), 7.34–7.28 (m, 5H), 6.59 (s, 1H), 5.01 (hept,  $J = 6.2$  Hz, 1H), 4.91 (hept,  $J = 6.3$  Hz, 1H), 3.13 (d,  $J = 16.7$  Hz, 1H), 3.00 (d,  $J = 16.5$  Hz, 1H), 2.89 (d,  $J = 13.0$  Hz, 1H), 2.86 (d,  $J = 13.2$  Hz, 1H), 2.60 (d,  $J = 13.9$  Hz, 1H), 2.29 (d,  $J = 13.8$  Hz, 1H), 1.34 (s, 3H), 1.21 (d,  $J = 6.3$  Hz, 3H), 1.15 (d,  $J = 6.2$  Hz, 3H), 1.12 (d,  $J = 6.3$  Hz, 3H), 0.98 (d,  $J = 6.3$  Hz, 3H);  **$^{13}\text{C NMR}$**  (151 MHz,  $\text{CDCl}_3$ ):  $\delta$  171.7, 171.5, 150.9, 138.6, 135.3, 133.5, 131.9, 130.7, 128.3, 127.8, 127.0, 126.2, 126.1, 125.7, 125.6, 125.4, 124.8, 120.0, 69.0, 68.8, 58.2, 48.1, 46.7, 45.1, 38.6, 27.0, 21.5, 21.44, 21.37, 21.2. **HRMS (ESI)** calcd for  $\text{C}_{32}\text{H}_{36}\text{O}_4\text{Na}^+$   $[\text{M}+\text{Na}]^+$  507.2506, found 507.2513.

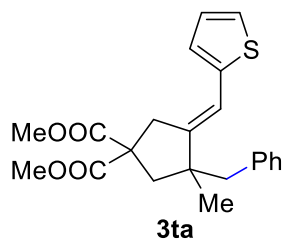

**Compound 3ta.** (Table 2, entry 20, 93% yield, 35.8 mg, 93.0  $\mu\text{mol}$ , a colorless oil, chromatography on silica gel, eluent: hexane/ethyl acetate (50/1),  $R_f = 0.4$  (hexane/ethyl acetate (25/1))).  **$^1\text{H NMR}$**  (600 MHz,  $\text{CDCl}_3$ ):  $\delta$  7.28–7.24 (m, 3H), 7.22 (d,  $J = 7.4$  Hz, 1H), 7.15 (d,  $J = 6.6$  Hz, 2H), 7.05–7.01 (m, 1H), 6.93 (d,  $J = 3.6$  Hz, 1H), 6.28 (t,  $J = 2.6$  Hz, 1H), 3.77 (s, 3H), 3.71 (s, 3H), 3.46 (dd,  $J = 17.7, 2.3$  Hz, 1H), 3.27 (dd,  $J = 17.8, 2.7$  Hz, 1H), 2.72 (d,  $J = 13.3$  Hz, 1H), 2.68 (d,  $J = 13.3$  Hz, 1H), 2.61 (d,  $J = 13.8$  Hz, 1H), 2.23 (d,  $J = 13.8$  Hz, 1H), 1.11 (s, 3H);  **$^{13}\text{C NMR}$**  (151 MHz,  $\text{CDCl}_3$ ):  $\delta$  172.6, 172.5, 147.6, 141.6, 138.3, 130.7, 127.8, 127.1, 126.3, 126.1, 124.7, 115.6, 58.5, 53.0, 52.9, 47.7, 47.6, 45.2, 39.5, 27.0. **HRMS (ESI)** calcd for  $\text{C}_{26}\text{H}_{26}\text{O}_4\text{SNa}^+$   $[\text{M}+\text{Na}]^+$  407.1288, Found 407.1293.

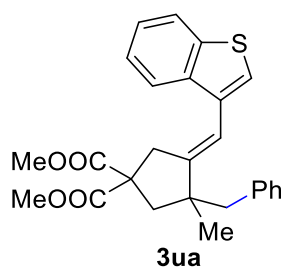

**Compound 3ua.** (Table 2, entry 21, 90% yield, 39.1 mg, 90.0  $\mu$ mol, a colorless oil, chromatography on silica gel, eluent: hexane/ethyl acetate (50/1),  $R_f$ = 0.4 (hexane/ethyl acetate (25/1))).  $^1\text{H NMR}$  (600 MHz,  $\text{CDCl}_3$ ):  $\delta$  7.87 (d,  $J$  = 7.1 Hz, 1H), 7.70 (d,  $J$  = 8.7 Hz, 1H), 7.42–7.34 (m, 2H), 7.29 (t,  $J$  = 7.6 Hz, 3H), 7.25 (d,  $J$  = 6.6 Hz, 1H), 7.21 (d,  $J$  = 8.0 Hz, 2H), 6.33 (t,  $J$  = 2.5 Hz, 1H), 3.75 (s, 3H), 3.68 (s, 3H), 3.41 (dd,  $J$  = 17.3, 2.8 Hz, 1H), 3.24 (dd,  $J$  = 17.3, 2.8 Hz, 1H), 2.80 (s, 2H), 2.64 (d,  $J$  = 13.9 Hz, 1H), 2.29 (d,  $J$  = 13.8 Hz, 1H), 1.24 (s, 3H);  $^{13}\text{C NMR}$  (151 MHz,  $\text{CDCl}_3$ ):  $\delta$  172.6, 172.4, 150.8, 139.6, 138.9, 138.3, 133.0, 130.7, 127.9, 126.3, 124.4, 124.0, 122.7, 122.6, 121.9, 113.9, 58.2, 52.9, 52.9, 47.9, 47.4, 45.2, 39.7, 27.1. **HRMS (ESI)** calcd for  $\text{C}_{26}\text{H}_{26}\text{O}_4\text{SNa}^+$   $[\text{M}+\text{Na}]^+$  457.1444, Found 457.1445.

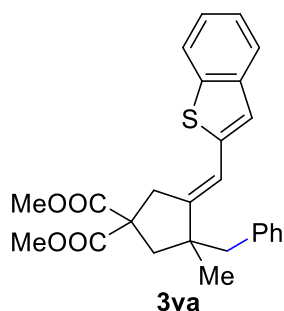

**Compound 3va.** (Table 2, entry 22, 90% yield, 39.1 mg, 90.0  $\mu$ mol, a colorless oil, chromatography on silica gel, eluent: hexane/ethyl acetate (50/1),  $R_f$ = 0.4 (hexane/ethyl acetate (25/1))).  $^1\text{H NMR}$  (600 MHz,  $\text{CDCl}_3$ ):  $\delta$  7.79 (d,  $J$  = 7.9 Hz, 1H), 7.73 (d,  $J$  = 7.8 Hz, 1H), 7.34 (t,  $J$  = 7.4 Hz, 1H), 7.29–7.23 (m, 4H), 7.17 (d,  $J$  = 7.8 Hz, 2H), 7.12 (s, 1H), 6.30 (t,  $J$  = 2.4 Hz, 1H), 3.78 (s, 3H), 3.72 (s, 3H), 3.58 (dd,  $J$  = 17.7, 2.4 Hz, 1H), 3.36 (dd,  $J$  = 17.8, 2.8 Hz, 1H), 2.75 (d,  $J$  = 13.3 Hz, 1H), 2.72 (d,  $J$  = 13.3 Hz, 1H), 2.63 (d,  $J$  = 13.7 Hz, 1H), 2.27 (d,  $J$  = 13.7 Hz, 1H), 1.15 (s, 3H);  $^{13}\text{C NMR}$  (151 MHz,  $\text{CDCl}_3$ ):  $\delta$  172.5, 172.4, 150.5, 141.4, 139.79, 139.78, 138.1, 130.7, 127.9, 126.4, 124.4, 124.0, 123.2, 122.6, 122.0, 116.2, 58.4, 53.0, 53.0, 47.9, 47.7, 45.1, 39.5, 27.0. **HRMS (ESI)** calcd for  $\text{C}_{26}\text{H}_{26}\text{O}_4\text{SNa}^+$   $[\text{M}+\text{Na}]^+$  457.1444, Found 457.1449.



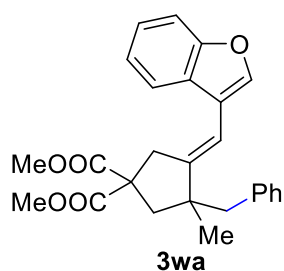

**Compound 3wa.** (Table 2, entry 23, 97% yield, 40.6 mg, 0.097.0  $\mu\text{mol}$ , a colorless oil, chromatography on silica gel, eluent: hexane/ethyl acetate (50/1),  $R_f$  = 0.4 (hexane/ethyl acetate (25/1))).  **$^1\text{H NMR}$**  (600 MHz,  $\text{CDCl}_3$ ):  $\delta$  7.60 (s, 1H), 7.54 (d,  $J$  = 7.2 Hz, 1H), 7.49 (d,  $J$  = 8.2 Hz, 1H), 7.32 (d,  $J$  = 7.3 Hz, 1H), 7.27 (t,  $J$  = 8.8 Hz, 2H), 7.26–7.21 (m, 2H), 7.18 (d,  $J$  = 6.8 Hz, 2H), 6.10 (t,  $J$  = 2.7 Hz, 1H), 3.76 (s, 3H), 3.70 (s, 3H), 3.31 (dd,  $J$  = 17.5, 2.2 Hz, 1H), 3.18 (dd,  $J$  = 17.4, 2.7 Hz, 1H), 2.76 (s, 2H), 2.64 (d,  $J$  = 13.8 Hz, 1H), 2.28 (d,  $J$  = 13.8 Hz, 1H), 1.19 (s, 3H);  **$^{13}\text{C NMR}$**  (151 MHz,  $\text{CDCl}_3$ ):  $\delta$  172.6, 172.5, 154.7, 150.3, 141.7, 138.3, 130.7, 127.8, 127.5, 126.3, 124.5, 122.5, 119.6, 118.2, 111.4, 109.8, 58.2, 53.0, 52.9, 47.8, 47.3, 45.4, 40.1, 27.0. **HRMS (ESI)** calcd for  $\text{C}_{26}\text{H}_{26}\text{O}_5\text{Na}^+$   $[\text{M}+\text{Na}]^+$  441.1672, Found 441.1683.

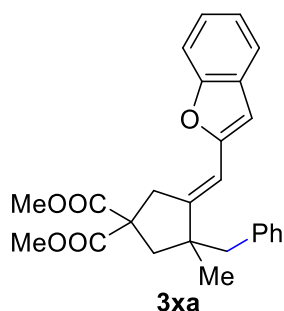

**Compound 3xa.** (Table 2, entry 24, 95% yield, 39.8 mg, 95.0  $\mu\text{mol}$ , a colorless oil, chromatography on silica gel, eluent: hexane/ethyl acetate (50/1),  $R_f$  = 0.4 (hexane/ethyl acetate (25/1))).  **$^1\text{H NMR}$**  (600 MHz,  $\text{CDCl}_3$ ):  $\delta$  7.53 (d,  $J$  = 7.5 Hz, 1H), 7.46 (d,  $J$  = 8.0 Hz, 1H), 7.29–7.19 (m, 5H), 7.16 (d,  $J$  = 7.0 Hz, 2H), 6.54 (s, 1H), 6.07 (t,  $J$  = 2.4 Hz, 1H), 3.79 (s, 3H), 3.72 (s, 3H), 3.68 (dd,  $J$  = 18.4, 2.3 Hz, 1H), 3.47 (dd,  $J$  = 18.4, 2.7 Hz, 1H), 2.75 (d,  $J$  = 13.2 Hz, 1H), 2.71 (d,  $J$  = 13.3 Hz, 1H), 2.64 (d,  $J$  = 13.8 Hz, 1H), 2.25 (d,  $J$  = 13.7 Hz, 1H), 1.14 (s, 3H);  **$^{13}\text{C NMR}$**  (151 MHz,  $\text{CDCl}_3$ ):  $\delta$  172.6, 172.5, 155.2, 154.5, 152.2, 138.0, 130.6, 129.0, 127.9, 126.4, 124.0, 122.7, 120.6, 111.3, 111.0, 104.6, 58.4, 53.0, 52.9, 48.0, 47.6, 45.0, 40.0, 26.9. **HRMS (ESI)** calcd for  $\text{C}_{26}\text{H}_{26}\text{O}_5\text{Na}^+$   $[\text{M}+\text{Na}]^+$  441.1672, Found 441.1672.

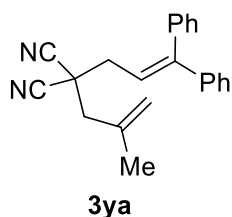

**Compound 3ya.** (Table 2, entry 25, 36% yield, 11.3 mg, 36.2  $\mu\text{mol}$ , a colorless oil, chromatography on silica gel, eluent: hexane/ethyl acetate (30/1),  $R_f=0.4$  (hexane/ethyl acetate (15/1))).  $^1\text{H NMR}$  (500 MHz,  $\text{CDCl}_3$ ):  $\delta$  7.46–7.35 (m, 3H), 7.35–7.25 (m, 5H), 7.23–7.18 (m, 2H), 6.20 (t,  $J=7.4$  Hz, 1H), 5.11 (quint,  $J=1.4$  Hz, 1H), 5.03 (quint,  $J=1.0$  Hz, 1H), 2.81 (d,  $J=7.4$  Hz, 2H), 2.55 (s, 2H), 1.91 (dd,  $J=1.6, 0.9$  Hz, 3H);  $^{13}\text{C NMR}$  (151 MHz,  $\text{CDCl}_3$ ):  $\delta$  148.9, 141.0, 138.5, 137.2, 129.6, 128.6, 128.3, 128.2, 127.9, 127.5, 118.6, 118.3, 115.5, 44.6, 38.1, 36.8, 23.0. **HRMS (ESI)** calcd for  $\text{C}_{22}\text{H}_{20}\text{N}_2\text{H}^+$   $[\text{M}+\text{H}]^+$  313.1699, found 313.1708.

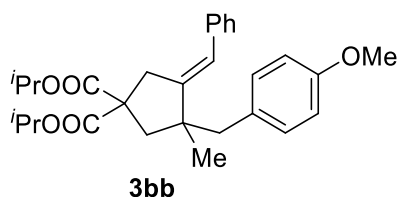

**Compound 3bb.** (Table 3, entry 1, 93% yield, 43.2 mg, 93.0  $\mu\text{mol}$ , a colorless oil, chromatography on silica gel, eluent: hexane/ethyl acetate (40/1),  $R_f=0.4$  (hexane/ethyl acetate (20/1))).  $^1\text{H NMR}$  (600 MHz,  $\text{CDCl}_3$ ):  $\delta$  7.33 (t,  $J=7.7$  Hz, 2H), 7.28–7.24 (m, 2H), 7.20 (t,  $J=7.4$  Hz, 1H), 7.10 (d,  $J=8.6$  Hz, 2H), 6.80 (d,  $J=8.6$  Hz, 2H), 6.08 (t,  $J=2.4$  Hz, 1H), 5.04 (hept,  $J=6.3$  Hz, 1H), 4.97 (hept,  $J=6.2$  Hz, 1H), 3.79 (s, 3H), 3.33 (d,  $J=17.2$  Hz, 1H), 3.10 (dd,  $J=16.9, 2.8$  Hz, 1H), 2.68 (s, 2H), 2.52 (d,  $J=13.8$  Hz, 1H), 2.18 (d,  $J=14.8$  Hz, 1H), 1.24 (d,  $J=6.3$  Hz, 3H), 1.21 (d,  $J=6.3$  Hz, 3H), 1.17 (d,  $J=6.2$  Hz, 3H), 1.16 (s, 3H), 1.13 (d,  $J=6.3$  Hz, 3H);  $^{13}\text{C NMR}$  (151 MHz,  $\text{CDCl}_3$ ):  $\delta$  171.7, 171.5, 158.1, 149.2, 138.0, 131.6, 130.7, 128.5, 128.1, 126.1, 122.1, 113.1, 69.1, 69.0, 58.6, 55.2, 47.4, 47.2, 44.5, 38.9, 26.9, 21.52, 21.51, 21.44, 21.39. **HRMS (ESI)** calcd for  $\text{C}_{29}\text{H}_{36}\text{O}_5\text{Na}^+$   $[\text{M}+\text{Na}]^+$  487.2455, found 487.2456.

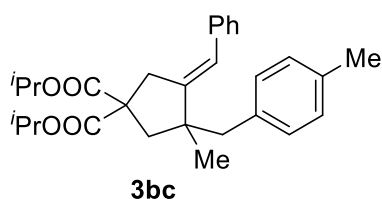

**Compound 3bc.** (Table 3, entry 2, 81% yield, 36.3 mg, 80.9  $\mu\text{mol}$ , a colorless oil, chromatography on silica gel, eluent: hexane/ethyl acetate (50/1),  $R_f$  = 0.4 (hexane/ethyl acetate (25/1))).  $^1\text{H NMR}$  (600 MHz,  $\text{CDCl}_3$ ):  $\delta$  7.34 (t,  $J$  = 7.7 Hz, 2H), 7.29–7.25 (m, 2H), 7.20 (t,  $J$  = 7.4 Hz, 1H), 7.07 (t,  $J$  = 8.7 Hz, 4H), 6.10 (t,  $J$  = 2.4 Hz, 1H), 5.04 (hept,  $J$  = 6.2 Hz, 1H), 4.97 (hept,  $J$  = 6.3 Hz, 1H), 3.33 (dd,  $J$  = 16.9, 2.7 Hz, 1H), 3.12 (dd,  $J$  = 16.9, 2.8 Hz, 1H), 2.70 (s, 2H), 2.54 (d,  $J$  = 13.8 Hz, 1H), 2.32 (s, 3H), 2.18 (d,  $J$  = 13.8 Hz, 1H), 1.24 (d,  $J$  = 6.3 Hz, 3H), 1.21 (d,  $J$  = 6.2 Hz, 3H), 1.18 (d,  $J$  = 6.7 Hz, 3H), 1.17 (s, 3H), 1.13 (d,  $J$  = 6.2 Hz, 3H);  $^{13}\text{C NMR}$  (151 MHz,  $\text{CDCl}_3$ ):  $\delta$  171.7, 171.5, 149.3, 138.1, 135.6, 135.4, 130.6, 128.5, 128.4, 128.1, 126.1, 122.1, 69.1, 68.9, 58.6, 47.6, 47.3, 44.5, 38.8, 26.6, 21.51, 21.50, 21.44, 21.39, 21.0. **HRMS (ESI)** calcd for  $\text{C}_{29}\text{H}_{36}\text{O}_4\text{Na}^+$   $[\text{M}+\text{Na}]^+$  471.2506, found 471.2614.

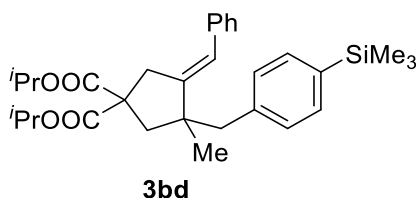

**Compound 3bd.** (Table 3, entry 3, 83% yield, 42.1 mg, 83.1  $\mu\text{mol}$ , a colorless oil, chromatography on silica gel, eluent: hexane/ethyl acetate (50/1),  $R_f$  = 0.4 (hexane/ethyl acetate (25/1))).  $^1\text{H NMR}$  (600 MHz,  $\text{CDCl}_3$ ):  $\delta$  7.41 (d,  $J$  = 7.8 Hz, 2H), 7.34 (t,  $J$  = 7.7 Hz, 2H), 7.28–7.25 (m, 2H), 7.22–7.16 (m, 3H), 6.10 (t,  $J$  = 2.5 Hz, 1H), 5.04 (hept,  $J$  = 6.3 Hz, 1H), 4.97 (hept,  $J$  = 6.3 Hz, 1H), 3.34 (dd,  $J$  = 16.5, 1.7 Hz, 1H), 3.17 (dd,  $J$  = 16.9, 2.7 Hz, 1H), 2.73 (s, 2H), 2.55 (d,  $J$  = 13.8 Hz, 1H), 2.18 (d,  $J$  = 13.8 Hz, 1H), 1.23 (d,  $J$  = 6.2 Hz, 3H), 1.21 (d,  $J$  = 6.3 Hz, 3H), 1.18 (d,  $J$  = 6.1 Hz, 3H), 1.17 (s, 3H), 1.14 (d,  $J$  = 6.2 Hz, 3H), 0.26 (s, 9H);  $^{13}\text{C NMR}$  (151 MHz,  $\text{CDCl}_3$ ):  $\delta$  171.7, 171.5, 149.3, 139.1, 138.0, 137.7, 132.8, 130.2, 128.5, 128.1, 126.2, 122.1, 69.1, 69.0, 58.7, 48.0, 47.4, 44.5, 38.8, 27.0, 21.54, 21.52, 21.45, 21.41, -1.06. **HRMS (ESI)** calcd for  $\text{C}_{31}\text{H}_{42}\text{O}_4\text{SiNa}^+$   $[\text{M}+\text{Na}]^+$  529.2745, found 529.2753.

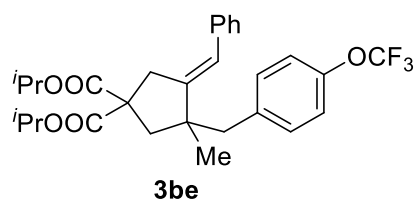

**Compound 3be.** (Table 3, entry 4, 86% yield, 44.6 mg, 86.0  $\mu\text{mol}$ , a colorless oil,

chromatography on silica gel, eluent: hexane/ethyl acetate (50/1),  $R_f = 0.4$  (hexane/ethyl acetate (25/1))).  $^1\text{H NMR}$  (600 MHz,  $\text{CDCl}_3$ ):  $\delta$  7.34 (t,  $J = 7.7$  Hz, 2H), 7.26–7.18 (m, 5H), 7.11 (d,  $J = 8.1$  Hz, 2H), 6.05 (t,  $J = 2.5$  Hz, 1H), 5.04 (hept,  $J = 6.3$  Hz, 1H), 4.97 (hept,  $J = 6.3$  Hz, 1H), 3.35 (dd,  $J = 17.0, 2.0$  Hz, 1H), 3.11 (dd,  $J = 17.0, 2.7$  Hz, 1H), 2.74 (s, 2H), 2.51 (d,  $J = 13.8$  Hz, 1H), 2.19 (d,  $J = 13.8$  Hz, 1H), 1.23 (d,  $J = 6.3$  Hz, 3H), 1.21 (d,  $J = 6.3$  Hz, 3H), 1.18 (d,  $J = 6.2$  Hz, 3H), 1.17 (s, 3H), 1.14 (d,  $J = 6.3$  Hz, 3H);  $^{13}\text{C NMR}$  (151 MHz,  $\text{CDCl}_3$ ):  $\delta$  171.7, 171.4, 148.6, 147.8, 137.8, 137.3, 131.9, 128.5, 128.2, 126.4, 122.5, 120.5 (q,  $J = 263.9$  Hz), 120.2, 69.2, 69.1, 59.6, 47.3, 47.1, 44.6, 38.8, 26.9, 21.5, 21.44, 21.40. **HRMS (ESI)** calcd for  $\text{C}_{29}\text{H}_{33}\text{F}_3\text{O}_5\text{Na}^+$   $[\text{M}+\text{Na}]^+$  541.2172, found 541.2173.

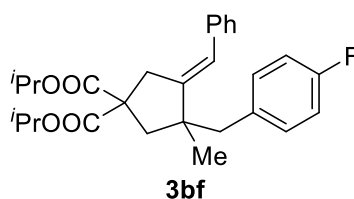

**Compound 3bf.** (Table 3, entry 5, 86% yield, 38.9 mg, 86.0  $\mu\text{mol}$ , a colorless oil, chromatography on silica gel, eluent: hexane/ethyl acetate (50/1),  $R_f = 0.4$  (hexane/ethyl acetate (25/1))).  $^1\text{H NMR}$  (600 MHz,  $\text{CDCl}_3$ ):  $\delta$  7.34 (t,  $J = 7.6$  Hz, 2H), 7.26 (d,  $J = 9.5$  Hz, 2H), 7.21 (t,  $J = 8.3$  Hz, 1H), 7.14 (dd,  $J = 8.4, 5.6$  Hz, 2H), 6.95 (t,  $J = 8.7$  Hz, 2H), 6.06 (t,  $J = 2.4$  Hz, 1H), 5.04 (hept,  $J = 6.3$  Hz, 1H), 4.98 (hept,  $J = 6.3$  Hz, 1H), 3.34 (dd,  $J = 16.9, 2.0$  Hz, 1H), 3.09 (dd,  $J = 17.0, 2.8$  Hz, 1H), 2.72 (s, 2H), 2.51 (d,  $J = 13.8$  Hz, 1H), 2.20 (d,  $J = 13.8$  Hz, 1H), 1.24 (d,  $J = 6.3$  Hz, 3H), 1.22 (d,  $J = 6.3$  Hz, 3H), 1.18 (d,  $J = 6.3$  Hz, 3H), 1.17 (s, 3H), 1.14 (d,  $J = 6.3$  Hz, 3H);  $^{13}\text{C NMR}$  (151 MHz,  $\text{CDCl}_3$ ):  $\delta$  171.7, 171.4, 161.6 (d,  $J = 244.3$  Hz), 148.7, 137.8, 134.2 (d,  $J = 3.2$  Hz), 132.0 (d,  $J = 7.7$  Hz), 128.5, 128.2, 126.3, 122.4, 114.5 (d,  $J = 20.8$  Hz), 69.1, 69.0, 58.6, 47.3, 47.1, 44.5, 38.8, 26.8, 21.5, 21.39, 21.42, 21.38. **HRMS (ESI)** calcd for  $\text{C}_{28}\text{H}_{33}\text{FO}_4\text{Na}^+$   $[\text{M}+\text{Na}]^+$  475.2155, found 475.2262.

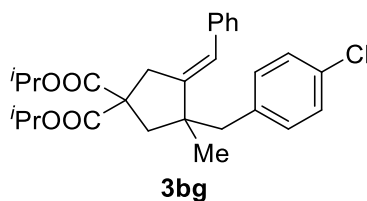

**Compound 3bg.** (Table 3, entry 6, 84% yield, 39.4 mg, 84.0  $\mu\text{mol}$ , a colorless oil,

chromatography on silica gel, eluent: hexane/ethyl acetate (50/1),  $R_f = 0.4$  (hexane/ethyl acetate (25/1))).  **$^1\text{H NMR}$**  (600 MHz,  $\text{CDCl}_3$ ):  $\delta$  7.33 (t,  $J = 7.7$  Hz, 2H), 7.26–7.19 (m, 5H), 7.11 (d,  $J = 8.3$  Hz, 2H), 6.05 (t,  $J = 2.4$  Hz, 1H), 5.04 (hept,  $J = 6.2$  Hz, 1H), 4.97 (hept,  $J = 6.3$  Hz, 1H), 3.34 (dd,  $J = 16.6, 2.0$  Hz, 1H), 3.09 (dd,  $J = 17.0, 2.8$  Hz, 1H), 2.70 (s, 2H), 2.49 (d,  $J = 13.9$  Hz, 1H), 2.18 (d,  $J = 14.4$  Hz, 1H), 1.23 (d,  $J = 6.3$  Hz, 3H), 1.21 (d,  $J = 6.3$  Hz, 3H), 1.18 (d,  $J = 6.3$  Hz, 3H), 1.17 (s, 3H), 1.14 (d,  $J = 6.3$  Hz, 3H);  **$^{13}\text{C NMR}$**  (151 MHz,  $\text{CDCl}_3$ ):  $\delta$  171.7, 171.4, 148.7, 137.8, 137.0, 132.2, 132.0, 128.5, 128.2, 127.9, 126.3, 122.5, 69.2, 69.0, 58.6, 47.3, 47.2, 44.6, 38.8, 26.8, 21.51, 21.45, 21.4. **HRMS (ESI)** calcd for  $\text{C}_{28}\text{H}_{33}\text{ClO}_4\text{Na}^+$   $[\text{M}+\text{Na}]^+$  491.1960, found 491.1967.

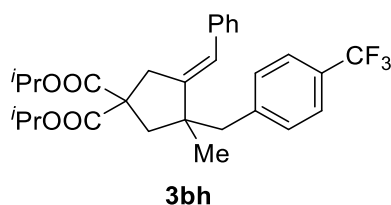

**Compound 3bh.** (Table 3, entry 7, 71% yield, 35.7 mg, 71.0  $\mu\text{mol}$ , a colorless oil, chromatography on silica gel, eluent: hexane/ethyl acetate (50/1),  $R_f = 0.4$  (hexane/ethyl acetate (25/1))).  **$^1\text{H NMR}$**  (600 MHz,  $\text{CDCl}_3$ ):  $\delta$  7.33 (t,  $J = 7.6$  Hz, 2H), 7.25 (d,  $J = 8.5$  Hz, 2H), 7.23–7.15 (m, 4H), 7.06 (d,  $J = 6.3$  Hz, 1H), 6.08 (t,  $J = 2.4$  Hz, 1H), 5.04 (hept,  $J = 6.3$  Hz, 1H), 4.97 (hept,  $J = 6.2$  Hz, 1H), 3.32 (d,  $J = 17.0, 2.2$  Hz, 1H), 3.12 (dd,  $J = 17.0, 2.8$  Hz, 1H), 2.71 (s, 2H), 2.49 (d,  $J = 13.9$  Hz, 1H), 2.20 (d,  $J = 13.9$  Hz, 1H), 1.24 (d,  $J = 6.3$  Hz, 3H), 1.21 (d,  $J = 6.2$  Hz, 3H), 1.18 (d,  $J = 6.7$  Hz, 3H), 1.17 (s, 3H), 1.13 (d,  $J = 6.3$  Hz, 3H);  **$^{13}\text{C NMR}$**  (151 MHz,  $\text{CDCl}_3$ ):  $\delta$  171.7, 171.3, 148.5, 142.7, 137.7, 131.0, 128.6 (q,  $J = 32.5$  Hz), 128.5, 128.3, 126.4, 124.6 (q,  $J = 3.8$  Hz), 124.4 (q,  $J = 272.4$  Hz), 122.6, 69.2, 69.1, 68.7, 58.6, 47.6, 47.3, 44.6, 38.8, 26.9, 21.5, 21.43, 21.38. **HRMS (ESI)** calcd for  $\text{C}_{29}\text{H}_{33}\text{F}_3\text{O}_4\text{Na}^+$   $[\text{M}+\text{Na}]^+$  525.2223, found 525.2229.

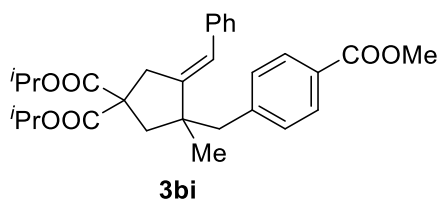

**Compound 3bi.** (Table 2, entry 8, 87% yield, 42.9 mg, 87.1  $\mu\text{mol}$ , a colorless oil, chromatography on silica gel, eluent: hexane/ethyl acetate (50/1),  $R_f=0.4$  (hexane/ethyl acetate (25/1))).  $^1\text{H NMR}$  (600 MHz,  $\text{CDCl}_3$ ):  $\delta$  7.93 (d,  $J = 8.3$  Hz, 2H), 7.33 (t,  $J = 7.6$  Hz, 2H), 7.25 (d,  $J = 7.3$  Hz, 2H), 7.24 (d,  $J = 7.3$  Hz, 2H), 7.21 (t,  $J = 7.2$  Hz, 1H), 6.06 (t,  $J = 2.4$  Hz, 1H), 5.04 (hept,  $J = 6.3$  Hz, 1H), 4.97 (hept,  $J = 6.3$  Hz, 1H), 3.90 (s, 3H), 3.33 (d,  $J = 17.1$  Hz, 1H), 3.11 (dd,  $J = 17.0, 2.8$  Hz, 1H), 2.79 (t,  $J = 13.0$  Hz, 2H), 2.51 (d,  $J = 13.8$  Hz, 1H), 2.20 (d,  $J = 13.8$  Hz, 1H), 1.23 (d,  $J = 6.3$  Hz, 3H), 1.21 (d,  $J = 6.3$  Hz, 3H), 1.168 (d,  $J = 6.3$  Hz, 3H), 1.167 (s, 3H), 1.13 (d,  $J = 6.3$  Hz, 3H);  $^{13}\text{C NMR}$  (151 MHz,  $\text{CDCl}_3$ ):  $\delta$  171.7, 171.4, 167.2, 148.5, 144.1, 137.7, 130.7, 129.0, 128.5, 128.20, 128.17, 126.4, 122.5, 69.2, 69.0, 58.6, 52.0, 47.9, 47.3, 44.7, 38.8, 26.8, 21.53, 21.51, 21.43, 21.38. **HRMS (ESI)** calcd for  $\text{C}_{30}\text{H}_{36}\text{O}_6\text{Na}^+$   $[\text{M}+\text{Na}]^+$  515.2404, found 515.2404.

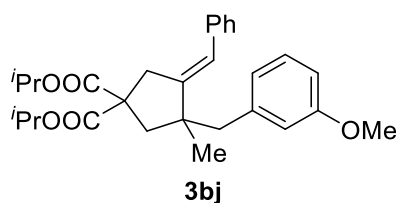

**Compound 3bj.** (Table 3, entry 9, 93% yield, 43.2 mg, 93.0  $\mu\text{mol}$ , a colorless oil, chromatography on silica gel, eluent: hexane/ethyl acetate (50/1),  $R_f=0.4$  (hexane/ethyl acetate (25/1))).  $^1\text{H NMR}$  (600 MHz,  $\text{CDCl}_3$ ):  $\delta$  7.33 (t,  $J = 7.6$  Hz, 2H), 7.27 (d,  $J = 7.5$  Hz, 2H), 7.23–7.15 (m, 2H), 6.77 (m, 3H), 6.11 (t,  $J = 2.4$  Hz, 1H), 5.04 (hept,  $J = 6.2$  Hz, 1H), 4.98 (hept,  $J = 6.3$  Hz, 1H), 3.74 (s, 3H), 3.34 (dd,  $J = 16.9, 2.0$  Hz, 1H), 3.13 (dd,  $J = 16.9, 2.8$  Hz, 1H), 2.73 (s, 2H), 2.55 (d,  $J = 13.8$  Hz, 1H), 2.21 (d,  $J = 13.8$  Hz, 1H), 1.24 (d,  $J = 6.3$  Hz, 3H), 1.22 (d,  $J = 6.2$  Hz, 3H), 1.19 (s, 3H), 1.18 (d,  $J = 6.3$  Hz, 3H), 1.14 (d,  $J = 6.2$  Hz, 3H);  $^{13}\text{C NMR}$  (151 MHz,  $\text{CDCl}_3$ ):  $\delta$  171.7, 171.5, 159.1, 149.1, 140.1, 138.0, 128.6, 128.5, 128.1, 126.2, 123.2, 122.2, 116.3, 111.7, 69.1, 68.9, 58.6, 55.1, 48.1, 47.3, 44.6, 38.8, 27.0, 21.50, 21.49, 21.42, 21.38. **HRMS (ESI)** calcd for  $\text{C}_{29}\text{H}_{36}\text{O}_5\text{Na}^+$   $[\text{M}+\text{Na}]^+$  487.2455, found 487.2463.

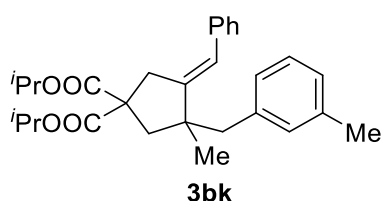

**Compound 3bk.** (Table 3, entry 10, 92% yield, 41.3 mg, 92.1  $\mu\text{mol}$ , a colorless oil, chromatography on silica gel, eluent: hexane/ethyl acetate (50/1),  $R_f = 0.4$  (hexane/ethyl acetate (25/1))).  $^1\text{H NMR}$  (600 MHz,  $\text{CDCl}_3$ ):  $\delta$  7.33 (t,  $J = 7.7$  Hz, 2H), 7.28–7.24 (m, 2H), 7.20 (t,  $J = 7.3$  Hz, 1H), 7.15 (t,  $J = 7.7$  Hz, 1H), 7.03 (d,  $J = 7.6$  Hz, 1H), 7.00 (s, 1H), 6.99 (d,  $J = 7.8$  Hz, 1H), 6.09 (t,  $J = 2.4$  Hz, 1H), 5.04 (hept,  $J = 6.2$  Hz, 1H), 4.97 (hept,  $J = 6.3$  Hz, 1H), 3.32 (d,  $J = 16.9$  Hz, 1H), 3.12 (dd,  $J = 16.9, 2.8$  Hz, 1H), 2.70 (s, 2H), 2.54 (d,  $J = 13.8$  Hz, 1H), 2.31 (s, 3H), 2.20 (d,  $J = 13.8$  Hz, 1H), 1.24 (d,  $J = 6.3$  Hz, 3H), 1.22 (d,  $J = 6.2$  Hz, 3H), 1.18 (s, 3H), 1.1747 (d,  $J = 6.23$  Hz, 3H), 1.13 (d,  $J = 6.3$  Hz, 3H);  $^{13}\text{C NMR}$  (151 MHz,  $\text{CDCl}_3$ ):  $\delta$  171.7, 171.6, 149.3, 138.5, 138.0, 137.1, 131.6, 128.5, 128.1, 127.7, 127.6, 126.9, 126.2, 122.2, 69.1, 68.9, 58.6, 48.0, 47.3, 44.5, 38.8, 26.9, 21.54, 21.51, 21.44, 21.40. **HRMS (ESI)** calcd for  $\text{C}_{29}\text{H}_{36}\text{O}_4\text{Na}^+$   $[\text{M}+\text{Na}]^+$  471.2506, found 471.2507.

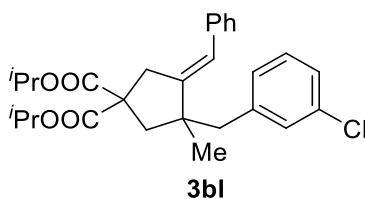

**Compound 3bl.** (Table 3, entry 11, 87% yield, 40.8 mg, 87.1  $\mu\text{mol}$ , a colorless oil, chromatography on silica gel, eluent: hexane/ethyl acetate (50/1),  $R_f = 0.4$  (hexane/ethyl acetate (25/1))).  $^1\text{H NMR}$  (600 MHz,  $\text{CDCl}_3$ ):  $\delta$  7.33 (t,  $J = 7.6$  Hz, 2H), 7.25 (d,  $J = 7.6$  Hz, 2H), 7.23–7.14 (m, 4H), 7.06 (d,  $J = 6.4$  Hz, 1H), 6.07 (t,  $J = 2.5$  Hz, 1H), 5.04 (hept,  $J = 6.3$  Hz, 1H), 4.97 (hept,  $J = 6.2$  Hz, 1H), 3.32 (d,  $J = 16.6$  Hz, 1H), 3.12 (dd,  $J = 17.0, 2.8$  Hz, 1H), 2.71 (s, 2H), 2.49 (d,  $J = 13.9$  Hz, 1H), 2.20 (d,  $J = 13.9$  Hz, 1H), 1.24 (d,  $J = 6.3$  Hz, 3H), 1.22 (d,  $J = 6.2$  Hz, 3H), 1.18 (d,  $J = 6.4$  Hz, 3H), 1.17 (s, 3H), 1.14 (d,  $J = 6.3$  Hz, 3H);  $^{13}\text{C NMR}$  (151 MHz,  $\text{CDCl}_3$ ):  $\delta$  171.7, 171.4, 148.7, 140.6, 137.8, 133.6, 130.7, 129.0, 128.9, 128.5, 128.2, 126.4, 126.3, 122.5, 69.2, 69.0, 58.6, 47.6, 47.3, 44.5, 38.8, 26.9, 21.6, 21.51, 21.45, 21.4. **HRMS (ESI)** calcd for  $\text{C}_{28}\text{H}_{33}\text{ClO}_4\text{Na}^+$   $[\text{M}+\text{Na}]^+$  491.1960, found 491.1960.

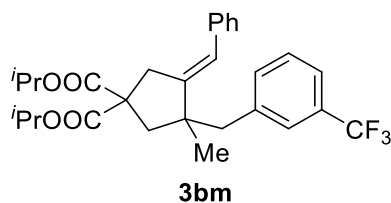

**Compound 3bm.** (Table 3, entry 12, 89% yield, 44.7 mg, 88.9  $\mu\text{mol}$ , a colorless oil, chromatography on silica gel, eluent: hexane/ethyl acetate (50/1),  $R_f$  = 0.4 (hexane/ethyl acetate (25/1))).  $^1\text{H NMR}$  (600 MHz,  $\text{CDCl}_3$ ):  $\delta$  7.50–7.46 (m, 1H), 7.43 (s, 1H), 7.37 (d,  $J$  = 5.3 Hz, 2H), 7.33 (t,  $J$  = 7.6 Hz, 2H), 7.26–7.18 (m, 3H), 6.04 (t,  $J$  = 2.4 Hz, 1H), 5.04 (hept,  $J$  = 6.3 Hz, 1H), 4.97 (hept,  $J$  = 6.3 Hz, 1H), 3.33 (dd,  $J$  = 16.9, 2.0 Hz, 1H), 3.12 (dd,  $J$  = 17.0, 2.8 Hz, 1H), 2.80 (s, 2H), 2.48 (d,  $J$  = 13.9 Hz, 1H), 2.23 (d,  $J$  = 13.9 Hz, 1H), 1.23 (d,  $J$  = 6.6 Hz, 3H), 1.21 (d,  $J$  = 6.6 Hz, 3H), 1.178 (s, 3H), 1.176 (d,  $J$  = 6.1 Hz, 3H), 1.13 (d,  $J$  = 6.3 Hz, 3H);  $^{13}\text{C NMR}$  (151 MHz,  $\text{CDCl}_3$ ):  $\delta$  171.6, 171.4, 148.3, 139.5, 137.7, 134.0, 130.1 (q,  $J$  = 31.9 Hz), 128.5, 128.2, 128.1, 127.3 (q,  $J$  = 3.8 Hz), 126.4, 124.2 (q,  $J$  = 272.6 Hz), 123.1 (q,  $J$  = 3.9 Hz), 122.8, 69.2, 69.1, 58.6, 47.7, 47.3, 44.6, 38.8, 26.8, 21.5, 21.43, 21.39. **HRMS (ESI)** calcd for  $\text{C}_{29}\text{H}_{33}\text{F}_3\text{O}_4\text{Na}^+$   $[\text{M}+\text{Na}]^+$  525.2223, found 525.2231.

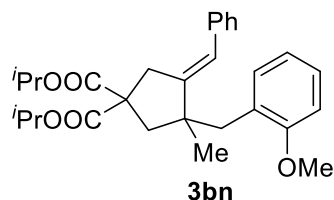

**Compound 3bn.** (Table 3, entry 13, 63% yield, 29.3 mg, 63.1  $\mu\text{mol}$ , a colorless oil, chromatography on silica gel, eluent: hexane/ethyl acetate (50/1),  $R_f$  = 0.4 (hexane/ethyl acetate (25/1))).  $^1\text{H NMR}$  (600 MHz,  $\text{CDCl}_3$ ):  $\delta$  7.30 (t,  $J$  = 7.6 Hz, 2H), 7.23 (d,  $J$  = 7.7 Hz, 2H), 7.17 (t,  $J$  = 7.6 Hz, 2H), 7.12 (d,  $J$  = 7.4 Hz, 1H), 6.84 (t,  $J$  = 7.4 Hz, 1H), 6.80 (d,  $J$  = 8.2 Hz, 1H), 5.96 (s, 1H), 5.07 (hept,  $J$  = 6.3 Hz, 1H), 4.98 (hept,  $J$  = 6.2 Hz, 1H), 3.75 (s, 3H), 3.32 (d,  $J$  = 16.8 Hz, 1H), 3.19 (d,  $J$  = 16.7 Hz, 1H), 2.98 (d,  $J$  = 13.0 Hz, 1H), 2.63 (d,  $J$  = 13.0 Hz, 1H), 2.56 (d,  $J$  = 13.8 Hz, 1H), 2.25 (d,  $J$  = 13.8 Hz, 1H), 1.23 (d,  $J$  = 6.7 Hz, 3H), 1.21 (d,  $J$  = 6.7 Hz, 3H), 1.17 (s, 3H), 1.16 (d,  $J$  = 4.7 Hz, 3H), 1.11 (d,  $J$  = 6.1 Hz, 3H);  $^{13}\text{C NMR}$  (151 MHz,  $\text{CDCl}_3$ ):  $\delta$  171.81, 171.75, 158.1, 149.3, 138.2, 132.2, 128.5, 128.0, 127.4, 127.2, 126.0, 121.6, 119.5, 110.2, 68.9, 68.8,



58.7, 55.1, 48.0, 45.3, 40.9, 38.8, 26.4, 21.6, 21.53, 21.45, 21.4. **HRMS (ESI)** calcd for  $C_{29}H_{36}O_5Na^+$   $[M+Na]^+$  487.2455, found 487.2467.

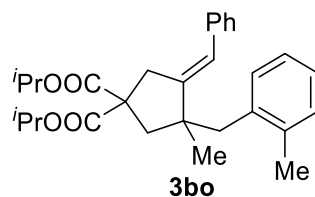

**Compound 3bo.** (Table 3, entry 14, 52% yield, 23.3 mg, 51.9  $\mu$ mol, a colorless oil, chromatography on silica gel, eluent: hexane/ethyl acetate (50/1),  $R_f$ =0.4 (hexane/ethyl acetate (25/1))).  **$^1H$  NMR** (600 MHz,  $CDCl_3$ ):  $\delta$  7.32 (t,  $J$  = 7.6 Hz, 2H), 7.24–7.17 (m, 3H), 7.15 (d,  $J$  = 6.4 Hz, 1H), 7.12–7.06 (m, 3H), 5.90 (t,  $J$  = 2.4 Hz, 1H), 5.04 (hept,  $J$  = 6.2 Hz, 1H), 4.97 (hept,  $J$  = 6.2 Hz, 1H), 3.34 (dd,  $J$  = 16.9, 2.2 Hz, 1H), 3.21 (dd,  $J$  = 17.0, 2.8 Hz, 1H), 2.89 (d,  $J$  = 13.6 Hz, 1H), 2.69 (d,  $J$  = 13.6 Hz, 1H), 2.50 (d,  $J$  = 13.7 Hz, 1H), 2.35 (d,  $J$  = 13.7 Hz, 1H), 2.28 (s, 3H), 1.23 (d,  $J$  = 6.6 Hz, 3H), 1.22 (d,  $J$  = 6.6 Hz, 3H), 1.20 (s, 3H), 1.18 (d,  $J$  = 6.3 Hz, 3H), 1.12 (d,  $J$  = 6.3 Hz, 3H);  **$^{13}C$  NMR** (151 MHz,  $CDCl_3$ ):  $\delta$  171.8, 171.5, 148.5, 138.0, 137.4, 136.9, 131.4, 130.3, 128.5, 128.1, 126.3, 126.2, 125.1, 122.5, 69.1, 69.0, 58.7, 48.2, 46.0, 43.8, 38.9, 26.8, 21.54, 21.51, 21.45, 21.4, 20.4. **HRMS (ESI)** calcd for  $C_{29}H_{36}O_4Na^+$   $[M+Na]^+$  471.2506, found 471.2514.

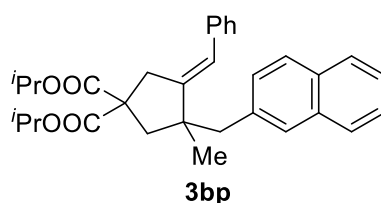

**Compound 3bp.** (Table 3, entry 15, 92% yield, 44.6 mg, 92.0  $\mu$ mol, a colorless oil, chromatography on silica gel, eluent: hexane/ethyl acetate (50/1),  $R_f$ =0.4 (hexane/ethyl acetate (25/1))).  **$^1H$  NMR** (600 MHz,  $CDCl_3$ ):  $\delta$  7.81 (d,  $J$  = 7.2 Hz, 1H), 7.78 (d,  $J$  = 7.1 Hz, 1H), 7.74 (d,  $J$  = 8.3 Hz, 1H), 7.65 (s, 1H), 7.48–7.40 (m, 2H), 7.34 (t,  $J$  = 7.7 Hz, 3H), 7.27 (s, 2H), 7.21 (t,  $J$  = 7.3 Hz, 1H), 6.13 (t,  $J$  = 2.4 Hz, 1H), 5.04 (hept,  $J$  = 6.2 Hz, 1H), 4.98 (hept,  $J$  = 6.2 Hz, 1H), 3.37 (dd,  $J$  = 16.8, 2.0 Hz, 1H), 3.15 (dd,  $J$  = 16.9, 2.8 Hz, 1H), 2.92 (s, 2H), 2.63 (d,  $J$  = 13.8 Hz, 1H), 2.23 (d,  $J$  = 13.8 Hz, 1H), 1.23 (s, 3H), 1.22 (d,  $J$  = 6.0 Hz, 3H), 1.20 (d,  $J$  = 6.2 Hz, 3H), 1.17 (d,  $J$  = 6.2 Hz, 3H), 1.14 (d,  $J$  = 6.3 Hz, 3H);  **$^{13}C$  NMR** (151 MHz,  $CDCl_3$ ):  $\delta$  171.7, 171.5, 149.1, 138.0,

136.2, 133.2, 132.1, 129.4, 129.1, 128.5, 128.1, 127.6, 127.5, 127.0, 126.2, 125.7, 125.3, 122.4, 69.1, 69.0, 58.7, 48.2, 47.6, 44.7, 38.9, 27.0, 21.51, 21.48, 21.44, 21.39. **HRMS (ESI)** calcd for  $C_{32}H_{36}O_4Na^+$   $[M+Na]^+$  507.2506, found 507.2516.

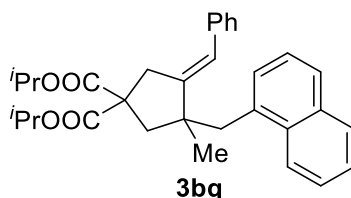

**Compound 3bq.** (Table 3, entry 16, 87% yield, 42.2 mg, 87.1 mmol, a colorless oil, chromatography on silica gel, eluent: hexane/ethyl acetate (50/1),  $R_f=0.4$  (hexane/ethyl acetate (25/1))).  **$^1H$  NMR** (600 MHz,  $CDCl_3$ ):  $\delta$  8.13 (d,  $J = 8.4$  Hz, 1H), 7.83 (d,  $J = 8.0$  Hz, 1H), 7.74 (d,  $J = 7.8$  Hz, 1H), 7.48–7.35 (m, 4H), 7.30 (t,  $J = 7.6$  Hz, 2H), 7.18 (t,  $J = 7.4$  Hz, 1H), 7.13 (d,  $J = 7.6$  Hz, 2H), 5.95 (s, 1H), 5.04 (hept,  $J = 6.3$  Hz, 1H), 4.97 (hept,  $J = 6.2$  Hz, 1H), 3.38 (d,  $J = 13.8$  Hz, 1H), 3.32 (d,  $J = 16.9$  Hz, 1H), 3.24 (dd,  $J = 16.9, 2.8$  Hz, 1H), 3.18 (d,  $J = 13.8$  Hz, 1H), 2.64 (d,  $J = 13.8$  Hz, 1H), 2.36 (d,  $J = 13.8$  Hz, 1H), 1.24 (s, 3H), 1.21 (d,  $J = 5.4$  Hz, 3H), 1.20 (d,  $J = 5.4$  Hz, 3H), 1.17 (d,  $J = 6.3$  Hz, 3H), 1.12 (d,  $J = 6.3$  Hz, 3H);  **$^{13}C$  NMR** (151 MHz,  $CDCl_3$ ):  $\delta$  171.8, 171.5, 148.6, 137.9, 135.0, 133.8, 133.4, 129.0, 128.6, 128.5, 128.0, 127.0, 126.1, 125.4, 125.1, 124.9, 122.9, 69.1, 68.9, 58.6, 48.3, 45.7, 43.1, 38.9, 27.3, 21.5, 21.44, 21.42, 21.37. **HRMS (ESI)** calcd for  $C_{32}H_{36}O_4Na^+$   $[M+Na]^+$  507.2506, found 507.2519.

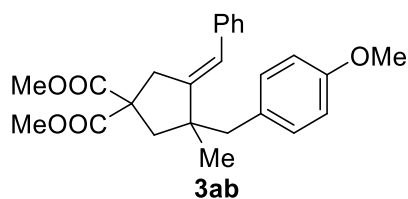

**Compound 3ab.** (Table 3, entry 17, 91% yield, 37.2 mg, 91.0 mmol, a colorless oil, chromatography on silica gel, eluent: hexane/ethyl acetate (50/1),  $R_f=0.4$  (hexane/ethyl acetate (25/1))).  **$^1H$  NMR** (600 MHz,  $CDCl_3$ ):  $\delta$  7.34 (t,  $J = 8.1$  Hz, 2H), 7.27 (d,  $J = 7.4$  Hz, 2H), 7.21 (t,  $J = 7.3$  Hz, 1H), 7.09 (d,  $J = 8.6$  Hz, 2H), 6.81 (d,  $J = 8.6$  Hz, 2H), 6.11 (t,  $J = 2.5$  Hz, 1H), 3.79 (s, 3H), 3.74 (s, 3H), 3.68 (s, 3H), 3.38 (dd,  $J = 17.2, 2.7$  Hz, 1H), 3.19 (dd,  $J = 17.1, 2.8$  Hz, 1H), 2.67 (s, 2H), 2.56 (d,  $J = 13.8$  Hz, 1H), 2.21 (d,  $J = 13.8$  Hz, 1H), 1.14 (s, 3H);  **$^{13}C$  NMR** (151 MHz,  $CDCl_3$ ):  $\delta$  172.6, 172.5, 158.1, 148.9, 137.9, 131.6, 130.5, 128.5, 128.2, 126.3, 122.3, 113.2, 58.4, 55.2, 52.9, 52.8,

47.5, 47.0, 44.7, 39.1, 27.0. **HRMS (ESI)** calcd for  $C_{25}H_{28}O_5Na^+$   $[M+Na]^+$  431.1829, Found 431.1830.

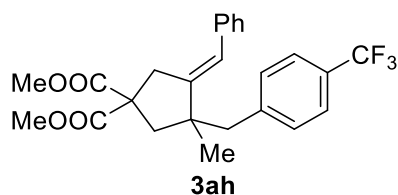

**Compound 3ah.** (Table 3, entry 18, 82% yield, 36.6 mg, 82.0  $\mu$ mol, a colorless oil, chromatography on silica gel, eluent: hexane/ethyl acetate (50/1),  $R_f$  = 0.4 (hexane/ethyl acetate (25/1))).  **$^1H$  NMR** (600 MHz,  $CDCl_3$ ):  $\delta$  7.52 (d,  $J$  = 8.0 Hz, 2H), 7.35 (t,  $J$  = 7.7 Hz, 2H), 7.29 (d,  $J$  = 7.9 Hz, 2H), 7.26 (d,  $J$  = 8.1 Hz, 2H), 7.23 (t,  $J$  = 7.4 Hz, 1H), 6.09 (t,  $J$  = 2.5 Hz, 1H), 3.75 (s, 3H), 3.68 (s, 3H), 3.41 (dd,  $J$  = 17.1, 2.2 Hz, 1H), 3.22 (dd,  $J$  = 17.2, 2.8 Hz, 1H), 2.79 (s, 2H), 2.56 (d,  $J$  = 13.8 Hz, 1H), 2.21 (d,  $J$  = 13.9 Hz, 1H), 1.15 (s, 3H);  **$^{13}C$  NMR** (101 MHz,  $CDCl_3$ ):  $\delta$  172.6, 172.3, 148.2, 142.5, 137.5, 130.9, 128.6 (q,  $J$  = 48.7 Hz), 128.4, 128.3, 126.5, 124.7 (q,  $J$  = 5.7 Hz), 124.3 (q,  $J$  = 407.8 Hz), 122.70, 58.3, 53.0, 52.9, 47.5, 47.4, 44.8, 39.0, 26.9. **HRMS (ESI)** calcd for  $C_{25}H_{25}F_3O_4Na^+$   $[M+Na]^+$  469.1597, Found 469.1605.

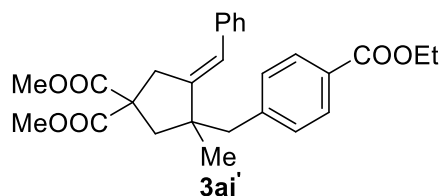

**Compound 3ai'.** (Table 3, entry 19, 83% yield, 37.4 mg, 83.0  $\mu$ mol, a colorless oil, chromatography on silica gel, eluent: hexane/ethyl acetate (50/1),  $R_f$  = 0.4 (hexane/ethyl acetate (25/1))).  **$^1H$  NMR** (600 MHz,  $CDCl_3$ ):  $\delta$  7.94 (d,  $J$  = 8.2 Hz, 2H), 7.34 (t,  $J$  = 7.7 Hz, 2H), 7.27–7.20 (m, 5H), 6.10 (t,  $J$  = 2.5 Hz, 1H), 4.36 (q,  $J$  = 7.1 Hz, 2H), 3.74 (s, 3H), 3.67 (s, 3H), 3.39 (dd,  $J$  = 17.1, 2.2 Hz, 1H), 3.20 (dd,  $J$  = 17.2, 2.8 Hz, 1H), 2.79 (s, 2H), 2.55 (d,  $J$  = 13.9 Hz, 1H), 2.22 (d,  $J$  = 13.8 Hz, 1H), 1.39 (t,  $J$  = 7.1 Hz, 3H), 1.15 (s, 3H);  **$^{13}C$  NMR** (151 MHz,  $CDCl_3$ ):  $\delta$  172.5, 172.3, 166.7, 148.3, 143.8, 137.6, 130.6, 129.0, 128.6, 128.5, 128.3, 126.5, 122.6, 60.8, 58.3, 52.9, 52.8, 47.8, 47.5, 44.8, 39.0, 26.9, 14.3. **HRMS (ESI)** calcd for  $C_{27}H_{30}O_6Na^+$   $[M+Na]^+$  473.1935, Found 473.1934.

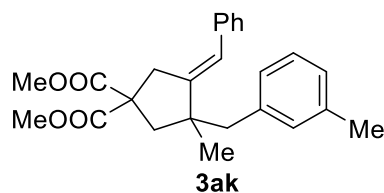

**Compound 3ak.** (Table 3, entry 20, 86% yield, 33.8 mg, 86.0 mmol, a colorless oil, chromatography on silica gel, eluent: hexane/ethyl acetate (50/1),  $R_f$  = 0.4 (hexane/ethyl acetate (25/1))). **<sup>1</sup>H NMR** (600 MHz, CDCl<sub>3</sub>): δ 7.34 (t,  $J$  = 7.7 Hz, 2H), 7.27 (d,  $J$  = 6.4 Hz, 2H), 7.21 (t,  $J$  = 7.4 Hz, 1H), 7.15 (t,  $J$  = 7.8 Hz, 1H), 7.03 (d,  $J$  = 7.5 Hz, 1H), 6.98 (d,  $J$  = 7.3 Hz, 2H), 6.12 (t,  $J$  = 2.6 Hz, 1H), 3.75 (s, 3H), 3.68 (s, 3H), 3.37 (dd,  $J$  = 17.1, 2.5 Hz, 1H), 3.21 (dd,  $J$  = 17.1, 2.8 Hz, 1H), 2.69 (s, 2H), 2.58 (d,  $J$  = 13.8 Hz, 1H), 2.31 (s, 3H), 2.22 (d,  $J$  = 13.8 Hz, 1H), 1.15 (s, 3H); **<sup>13</sup>C NMR** (151 MHz, CDCl<sub>3</sub>): δ 172.6, 172.5, 149.0, 138.3, 137.9, 137.2, 131.5, 128.5, 128.2, 127.7, 127.6, 126.9, 126.3, 122.3, 58.4, 52.9, 52.8, 47.9, 47.4, 44.7, 39.1, 27.0, 21.4. **HRMS (ESI)** calcd for C<sub>25</sub>H<sub>28</sub>O<sub>4</sub>Na<sup>+</sup> [M+Na]<sup>+</sup> 415.1880, Found 415.1887.

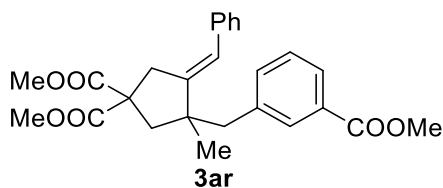

**Compound 3ar.** (Table 3, entry 21, 86% yield, 37.5 mg, 86.0 mmol, a colorless oil, chromatography on silica gel, eluent: hexane/ethyl acetate (50/1),  $R_f$  = 0.4 (hexane/ethyl acetate (25/1))). **<sup>1</sup>H NMR** (600 MHz, CDCl<sub>3</sub>): δ 7.90 (d,  $J$  = 7.6 Hz, 1H), 7.85 (s, 1H), 7.38–7.32 (m, 4H), 7.26–7.24 (m, 2H), 7.21 (t,  $J$  = 7.3 Hz, 1H), 6.08 (t,  $J$  = 2.5 Hz, 1H), 3.87 (s, 3H), 3.76 (s, 3H), 3.68 (s, 3H), 3.36 (dd,  $J$  = 17.1, 2.1 Hz, 1H), 3.25 (dd,  $J$  = 17.2, 2.8 Hz, 1H), 2.77 (s, 2H), 2.54 (d,  $J$  = 13.8 Hz, 1H), 2.24 (d,  $J$  = 13.9 Hz, 1H), 1.16 (s, 3H); **<sup>13</sup>C NMR** (151 MHz, CDCl<sub>3</sub>): δ 172.6, 172.4, 167.2, 148.3, 138.7, 137.7, 135.2, 131.6, 129.7, 128.6, 128.2, 127.8, 127.6, 126.4, 122.7, 58.3, 53.0, 52.9, 52.0, 47.5, 44.7, 39.02, 26.7. **HRMS (ESI)** calcd for C<sub>26</sub>H<sub>28</sub>O<sub>6</sub>Na<sup>+</sup> [M+Na]<sup>+</sup> 459.1778, Found 459.1788.

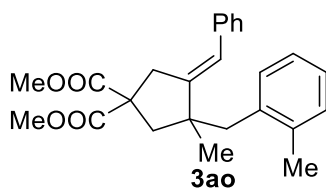

**Compound 3ao.** (Table 3, entry 22, 74% yield, 29.0 mg, 74.0  $\mu\text{mol}$ , a colorless oil, chromatography on silica gel, eluent: hexane/ethyl acetate (50/1),  $R_f=0.4$  (hexane/ethyl acetate (25/1))).  $^1\text{H NMR}$  (600 MHz,  $\text{CDCl}_3$ ):  $\delta$  7.34 (t,  $J=7.7$  Hz, 2H), 7.24–7.19 (m, 3H), 7.16–7.07 (m, 4H), 6.12 (t,  $J=2.6$  Hz, 1H), 3.75 (s, 3H), 3.68 (s, 3H), 3.37 (dd,  $J=17.1, 2.5$  Hz, 1H), 3.21 (dd,  $J=17.1, 2.8$  Hz, 1H), 2.69 (s, 2H), 2.58 (d,  $J=13.8$  Hz, 1H), 2.31 (s, 3H), 2.22 (d,  $J=13.8$  Hz, 1H), 1.15 (s, 3H);  $^{13}\text{C NMR}$  (151 MHz,  $\text{CDCl}_3$ ):  $\delta$  172.6, 172.5, 148.1, 137.9, 137.3, 136.7, 131.3, 130.3, 128.5, 128.2, 126.3, 126.7, 125.2, 122.6, 58.4, 52.9, 52.8, 47.9, 47.4, 44.7, 39.1, 27.0, 21.4. **HRMS (ESI)** calcd for  $\text{C}_{25}\text{H}_{28}\text{O}_4\text{Na}^+$   $[\text{M}+\text{Na}]^+$  415.1880, Found 415.1887.

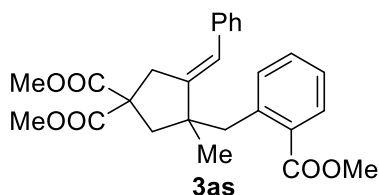

**Compound 3as.** (Table 3, entry 23, 88% yield, 38.4 mg, 88.0  $\mu\text{mol}$ , a colorless oil, chromatography on silica gel, eluent: hexane/ethyl acetate (50/1),  $R_f=0.4$  (hexane/ethyl acetate (25/1))).  $^1\text{H NMR}$  (600 MHz,  $\text{CDCl}_3$ ):  $\delta$  7.80 (d,  $J=7.8$  Hz, 1H), 7.37 (t,  $J=7.6$  Hz, 1H), 7.32 (t,  $J=7.7$  Hz, 2H), 7.29–7.18 (m, 5H), 5.87 (t,  $J=2.3$  Hz, 1H), 3.76 (s, 3H), 3.75 (s, 3H), 3.66 (s, 3H), 3.54 (d,  $J=13.1$  Hz, 1H), 3.40 (d,  $J=17.1$  Hz, 1H), 3.20 (dd,  $J=17.1, 2.8$  Hz, 1H), 3.09 (d,  $J=13.1$  Hz, 1H), 2.55 (d,  $J=13.8$  Hz, 1H), 2.28 (d,  $J=13.4$  Hz, 1H), 1.08 (s, 3H);  $^{13}\text{C NMR}$  (151 MHz,  $\text{CDCl}_3$ ):  $\delta$  172.5, 172.5, 168.6, 148.1, 139.6, 137.8, 133.0, 131.5, 130.9, 130.2, 128.6, 128.1, 126.3, 126.2, 122.8, 58.4, 52.9, 52.8, 51.8, 48.1, 46.0, 43.4, 39.0, 26.4. **HRMS (ESI)** calcd for  $\text{C}_{26}\text{H}_{28}\text{O}_6\text{Na}^+$   $[\text{M}+\text{Na}]^+$  459.1778, Found 459.1787.

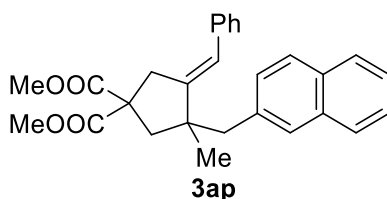

**Compound 3ap.** (Table 3, entry 24, 97% yield, 41.6 mg, 97.0  $\mu\text{mol}$ , a colorless oil,

chromatography on silica gel, eluent: hexane/ethyl acetate (50/1),  $R_f = 0.4$  (hexane/ethyl acetate (25/1))).  $^1\text{H NMR}$  (600 MHz,  $\text{CDCl}_3$ ):  $\delta$  7.82 (d,  $J = 7.1$  Hz, 1H), 7.79 (d,  $J = 7.1$  Hz, 1H), 7.75 (d,  $J = 8.4$  Hz, 1H), 7.65 (s, 1H), 7.49–7.42 (m, 2H), 7.37–7.33 (m, 3H), 7.28 (d,  $J = 7.3$  Hz, 2H), 7.23 (t,  $J = 7.3$  Hz, 1H), 6.17 (t,  $J = 2.4$  Hz, 1H), 3.74 (s, 3H), 3.68 (s, 3H), 3.42 (dd,  $J = 17.1, 2.1$  Hz, 1H), 3.25 (dd,  $J = 17.1, 2.7$  Hz, 1H), 2.92 (s, 2H), 2.68 (d,  $J = 13.8$  Hz, 1H), 2.26 (d,  $J = 13.8$  Hz, 1H), 1.22 (s, 3H);  $^{13}\text{C NMR}$  (151 MHz,  $\text{CDCl}_3$ ):  $\delta$  172.6, 172.5, 148.9, 137.8, 136.0, 133.2, 132.1, 129.3, 129.1, 128.5, 128.2, 127.6, 127.5, 127.1, 126.3, 125.8, 125.3, 122.4, 58.4, 52.9, 52.8, 48.0, 47.7, 44.8, 39.1, 27.1. **HRMS (ESI)** calcd for  $\text{C}_{28}\text{H}_{28}\text{O}_4\text{Na}^+$   $[\text{M}+\text{Na}]^+$  451.1880, Found 451.1890.

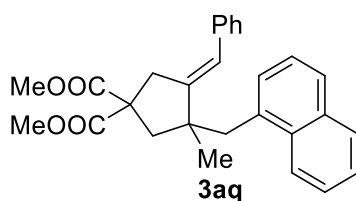

**Compound 3aq.** (Table 3, entry 25, 82% yield, 35.1 mg, 82.0  $\mu\text{mol}$ , a colorless oil, chromatography on silica gel, eluent: hexane/ethyl acetate (50/1),  $R_f = 0.4$  (hexane/ethyl acetate (25/1))).  $^1\text{H NMR}$  (600 MHz,  $\text{CDCl}_3$ ):  $\delta$  8.11 (d,  $J = 8.3$  Hz, 1H), 7.83 (d,  $J = 8.8$  Hz, 1H), 7.74 (d,  $J = 8.0$  Hz, 1H), 7.48–7.36 (m, 3H), 7.35 (d,  $J = 7.1$  Hz, 1H), 7.31 (t,  $J = 7.7$  Hz, 2H), 7.19 (t,  $J = 7.4$  Hz, 1H), 7.15 (d,  $J = 7.2$  Hz, 2H), 5.99 (t,  $J = 2.5$  Hz, 1H), 3.72 (s, 3H), 3.67 (s, 3H), 3.37 (dd,  $J = 17.1, 2.0$  Hz, 1H), 3.36 (d,  $J = 13.8$  Hz, 1H), 3.31 (dd,  $J = 17.1, 2.8$  Hz, 1H), 3.17 (d,  $J = 13.8$  Hz, 1H), 2.70 (d,  $J = 13.8$  Hz, 1H), 2.36 (d,  $J = 13.8$  Hz, 1H), 1.20 (s, 3H);  $^{13}\text{C NMR}$  (151 MHz,  $\text{CDCl}_3$ ):  $\delta$  172.7, 172.5, 148.3, 137.8, 134.9, 133.8, 133.3, 129.0, 128.6, 128.5, 128.1, 127.1, 126.3, 125.5, 125.2, 124.9, 124.8, 122.9, 58.4, 52.9, 52.8, 48.4, 46.0, 42.9, 39.0, 27.3. **HRMS (ESI)** calcd for  $\text{C}_{28}\text{H}_{28}\text{O}_4\text{Na}^+$   $[\text{M}+\text{Na}]^+$  451.1880, Found 451.1879.

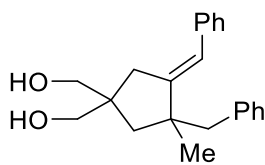

**5**

**Compound 5.** (92% yield, 47.5 mg, 147  $\mu\text{mol}$ , a colorless oil, chromatography on silica

gel, eluent: hexane/ethyl acetate (6/1),  $R_f = 0.4$  (hexane/ethyl acetate (3/1))).  $^1\text{H NMR}$  (600 MHz,  $\text{CDCl}_3$ ):  $\delta$  7.33 (t,  $J = 7.7$  Hz, 2H), 7.27–7.23 (m, 4H), 7.23–7.19 (m, 2H), 7.17 (d,  $J = 7.8$  Hz, 2H), 6.22 (t,  $J = 2.2$  Hz, 1H), 3.57–3.45 (m, 4H), 2.77 (s, 2H), 2.60 (d,  $J = 16.2$  Hz, 1H), 2.32 (s, 2H), 2.14 (dd,  $J = 16.3, 2.8$  Hz, 1H), 1.85 (d,  $J = 14.0$  Hz, 1H), 1.45 (d,  $J = 14.0$  Hz, 1H), 1.27 (s, 3H);  $^{13}\text{C NMR}$  (151 MHz,  $\text{CDCl}_3$ ):  $\delta$  151.2, 139.0, 138.9, 130.7, 128.6, 128.2, 127.7, 126.22, 126.16, 122.3, 71.0, 69.8, 49.8, 47.1, 46.9, 42.2, 37.6, 29.0. **HRMS (ESI)** calcd for  $\text{C}_{22}\text{H}_{26}\text{O}_2\text{Na}^+ [\text{M}+\text{Na}]^+$  345.1825, found 345.1830.

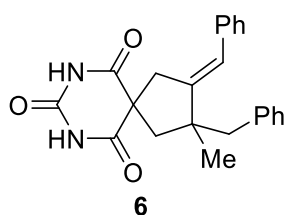

**Compound 6.** (95% yield, 39.1 mg, 105  $\mu\text{mol}$ , a white solid, chromatography on silica gel, eluent: hexane/ethyl acetate (20/1),  $R_f = 0.4$  (hexane/ethyl acetate (10/1))).  $^1\text{H NMR}$  (600 MHz,  $\text{CDCl}_3$ ):  $\delta$  8.70 (s, 1H), 8.53 (s, 1H), 7.31 (t,  $J = 7.6$  Hz, 2H), 7.26 (t,  $J = 7.4$  Hz, 2H), 7.21 (t,  $J = 6.9$  Hz, 2H), 7.20–7.16 (m, 4H), 6.16 (t,  $J = 2.4$  Hz, 1H), 3.39 (d,  $J = 16.2$  Hz, 1H), 3.24 (dd,  $J = 16.2, 2.7$  Hz, 1H), 2.90 (s, 2H), 2.59 (d,  $J = 13.9$  Hz, 1H), 2.06 (d,  $J = 13.8$  Hz, 1H), 1.33 (s, 3H);  $^{13}\text{C NMR}$  (151 MHz,  $\text{CDCl}_3$ ):  $\delta$  172.7, 172.4, 148.9, 148.1, 138.2, 137.6, 130.8, 128.7, 128.2, 127.8, 126.6, 126.4, 122.7, 55.5, 48.8, 48.0, 46.9, 41.1, 26.3. **HRMS (ESI)** calcd for  $\text{C}_{23}\text{H}_{22}\text{O}_3\text{Na}^+ [\text{M}+\text{Na}]^+$  397.1523, found 397.1528.

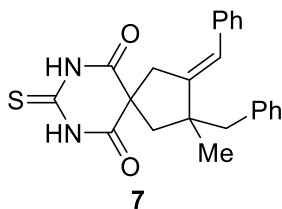

**Compound 7.** (98% yield, 20.3 mg, 51.9  $\mu\text{mol}$ , a white solid, chromatography on silica gel, eluent: hexane/ethyl acetate (20/1),  $R_f = 0.4$  (hexane/ethyl acetate (10/1))).  $^1\text{H NMR}$  (600 MHz,  $\text{CDCl}_3$ ):  $\delta$  8.89 (s, 1H), 8.75 (s, 1H), 7.33 (t,  $J = 7.7$  Hz, 2H), 7.28 (m,  $J = 7.3$  Hz, 2H), 7.23 (t,  $J = 7.3$  Hz, 2H), 7.18 (d,  $J = 4.8$  Hz, 4H), 6.19 (s, 1H), 3.29 (d,  $J = 16.2$  Hz, 1H), 3.23 (d,  $J = 16.2$  Hz, 1H), 2.91 (s, 2H), 2.62 (d,  $J = 13.9$  Hz, 1H),

2.09 (d,  $J = 13.8$  Hz, 1H), 1.35 (s, 3H);  $^{13}\text{C}$  NMR (151 MHz,  $\text{CDCl}_3$ ):  $\delta$  175.8, 170.4, 170.1, 147.8, 138.1, 137.5, 130.8, 128.7, 128.3, 127.9, 126.7, 126.4, 123.0, 55.8, 48.8, 48.1, 46.9, 41.2, 26.4. **HRMS (ESI)** calcd for  $\text{C}_{23}\text{H}_{22}\text{O}_2\text{SNa}^+$   $[\text{M}+\text{Na}]^+$  413.1294, found 413.1299.

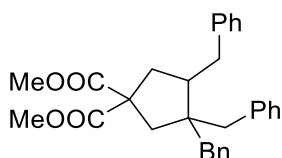

**8**

**Compound 8.** (94% yield, 22.7 mg, 49.7  $\mu\text{mol}$ , a white solid, chromatography on silica gel, eluent: hexane/ethyl acetate (20/1),  $R_f = 0.4$  (hexane/ethyl acetate (10/1))).  $^1\text{H}$  NMR (600 MHz,  $\text{CDCl}_3$ ):  $\delta$  7.34 (t,  $J = 7.5$  Hz, 2H), 7.32–7.27 (m, 7H), 7.25–7.17 (m, 4H), 7.12 (d,  $J = 7.4$  Hz, 2H), 3.77 (s, 3H), 3.41 (s, 3H), 3.11 (d,  $J = 13.4$  Hz, 1H), 2.83 (d,  $J = 13.7$  Hz, 1H), 2.75 (d,  $J = 13.1$  Hz, 1H), 2.68 (dd,  $J = 13.4, 7.0$  Hz, 2H), 2.55–2.46 (m, 2H), 2.26–2.17 (m, 2H), 2.15–2.03 (m, 2H);  $^{13}\text{C}$  NMR (151 MHz,  $\text{CDCl}_3$ ):  $\delta$  173.5, 172.7, 140.8, 138.3, 137.6, 131.3, 131.1, 128.6, 128.5, 128.0, 127.9, 126.4, 126.2, 126.0, 56.8, 52.7, 52.5, 48.6, 45.4, 40.7, 40.0, 38.1, 37.8, 34.8. **HRMS (ESI)** calcd for  $\text{C}_{30}\text{H}_{32}\text{O}_4\text{Na}^+$   $[\text{M}+\text{Na}]^+$  479.2193, found 479.2198.



## 8. Another Possible Catalytic cycle

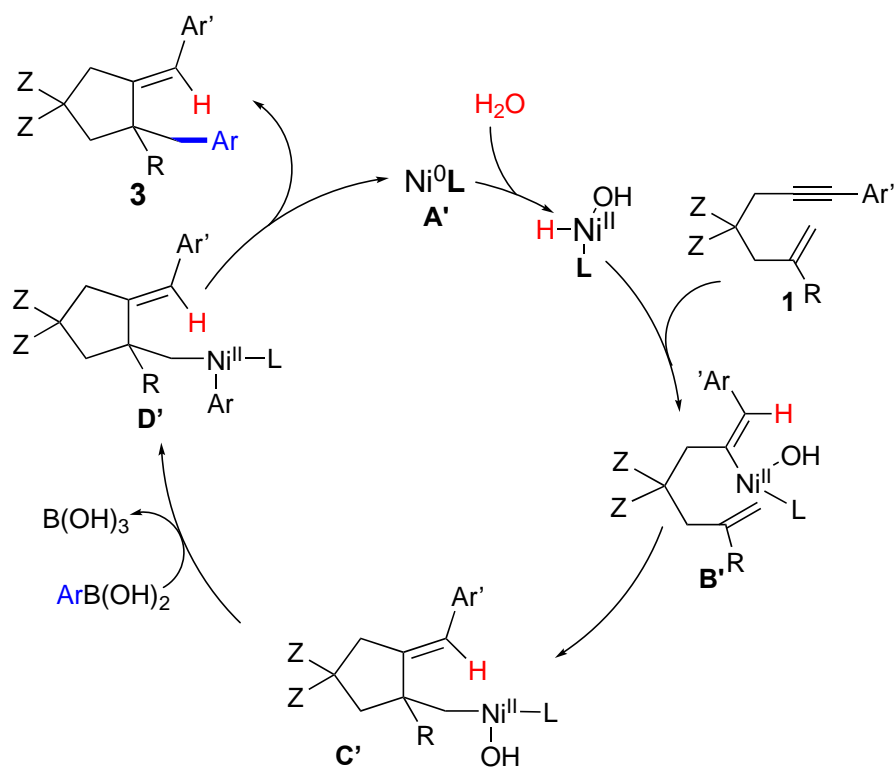

## 9. Single Crystal X-ray Diffraction Data for Compound 3ha (CCDC 2307259)

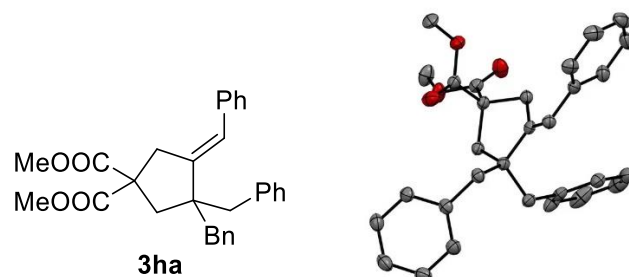

Figure S1. ORTEP illustration of compound **3ha** with thermal ellipsoids drawn at 50% probability level

**Table S1 Crystal data and structure refinement for 3ha.**

|                                    |                                                               |
|------------------------------------|---------------------------------------------------------------|
| Identification code                | <b>3ha</b>                                                    |
| Empirical formula                  | C <sub>30</sub> H <sub>30</sub> O <sub>4</sub>                |
| Formula weight                     | 454.54                                                        |
| Temperature/K                      | 149.99(10)                                                    |
| Crystal system                     | monoclinic                                                    |
| Space group                        | P2 <sub>1</sub> /n                                            |
| a/Å                                | 10.29250(10)                                                  |
| b/Å                                | 15.4717(2)                                                    |
| c/Å                                | 15.4935(2)                                                    |
| α/°                                | 90                                                            |
| β/°                                | 94.9010(10)                                                   |
| γ/°                                | 90                                                            |
| Volume/Å <sup>3</sup>              | 2458.20(5)                                                    |
| Z                                  | 4                                                             |
| ρ <sub>calc</sub> /cm <sup>3</sup> | 1.228                                                         |
| μ/mm <sup>-1</sup>                 | 0.640                                                         |
| F(000)                             | 968.0                                                         |
| Crystal size/mm <sup>3</sup>       | 0.15 × 0.12 × 0.1                                             |
| Radiation                          | Cu Kα (λ = 1.54184)                                           |
| 2θ range for data collection/°     | 8.09 to 142.848                                               |
| Index ranges                       | -12 ≤ h ≤ 12, -18 ≤ k ≤ 17, -12 ≤ l ≤ 18                      |
| Reflections collected              | 13337                                                         |
| Independent reflections            | 4702 [R <sub>int</sub> = 0.0248, R <sub>sigma</sub> = 0.0256] |
| Data/restraints/parameters         | 4702/0/310                                                    |
| Goodness-of-fit on F <sup>2</sup>  | 1.023                                                         |
| Final R indexes [I >= 2σ (I)]      | R <sub>1</sub> = 0.0377, wR <sub>2</sub> = 0.0985             |

Final R indexes [all data]  $R_1 = 0.0401$ ,  $wR_2 = 0.1005$

Largest diff. peak/hole /  $e \text{ \AA}^{-3}$  0.27/-0.17

## 10. Details for the DFT Calculations

### Computational details

All calculations were performed using Gaussian 09 program package,<sup>11</sup> employing the B3LYP-D3(BJ)<sup>12,13</sup> functional and mixed basis set (the lanL2DZ ECP<sup>14</sup> for Ni atom, and the 6-31G\*\*<sup>15</sup> basis set for the other atoms). Geometries were optimized in the mixed solvent (toluene/H<sub>2</sub>O=10/1), and characterized by frequency analysis at 373 K. The self-consistent reaction field (SCRF) method based on the universal solvation model SMD<sup>16</sup> was adopted to evaluate the effect of solvent. The intrinsic reaction coordinate (IRC) path<sup>17</sup> was traced to check the energy profiles connecting each transition state to two associated minima of the proposed mechanism.

**Table S2** The corrected electronic energies ( $E_{ZPE}$ ), enthalpies ( $H$ ), and Gibbs free energies ( $G$ ) for all stationary points (in Hartree) in the reaction, obtained at the B3LYP/[6-31G\*\*, Lan12DZ ] (SMD, toluene/H<sub>2</sub>O=10/1) theoretical level at 373K.

| Structure            | <sup>a</sup> ZPE | <sup>b</sup> H <sub>c</sub> | <sup>c</sup> G <sub>c</sub> | E <sub>ZEP</sub> | H           | G           |
|----------------------|------------------|-----------------------------|-----------------------------|------------------|-------------|-------------|
| cod                  | 0.18046          | 0.19308                     | 0.13848                     | -311.91634       | -311.90372  | -311.95832  |
| H <sub>2</sub> O     | 0.02118          | 0.02591                     | -0.00198                    | -76.40611        | -76.40137   | -76.42927   |
| PhB(OH) <sub>2</sub> | 0.12513          | 0.13824                     | 0.07951                     | -408.20138       | -408.18826  | -408.24700  |
| B(OH) <sub>3</sub>   | 0.04818          | 0.05594                     | 0.01330                     | -252.45493       | -252.44717  | -252.48981  |
| I-IM0                | 0.70968          | 0.78186                     | 0.58770                     | -2435.68690      | -2435.61473 | -2435.80888 |
| I-TS1                | 0.70951          | 0.77998                     | 0.58749                     | -2435.65453      | -2435.58407 | -2435.77656 |
| I-IM1                | 0.71278          | 0.78279                     | 0.59237                     | -2435.68710      | -2435.61710 | -2435.80751 |
| I-IM2                | 0.89597          | 0.97949                     | 0.76286                     | -2747.61426      | -2747.53074 | -2747.74737 |
| I-TS2                | 0.89575          | 0.97857                     | 0.76348                     | -2747.60687      | -2747.52404 | -2747.73913 |
| I-IM3                | 0.89694          | 0.97854                     | 0.76815                     | -2747.66854      | -2747.58695 | -2747.79734 |
| I-IM4                | 0.92157          | 1.00952                     | 0.78122                     | -2824.08739      | -2823.99944 | -2824.22774 |
| I-TS3                | 0.91735          | 1.00382                     | 0.77833                     | -2824.07910      | -2823.99264 | -2824.21813 |
| I-IM5                | 0.92330          | 1.00893                     | 0.78662                     | -2824.11536      | -2824.02972 | -2824.25204 |
| 3                    | 0.45058          | 0.49163                     | 0.36810                     | -1230.86832      | -1230.82727 | -1230.95080 |
| Ni-OH                | 0.47040          | 0.51400                     | 0.38476                     | -1593.25299      | -1593.20938 | -1593.33863 |
| I-TS4                | 0.59680          | 0.65481                     | 0.49297                     | -2001.46680      | -2001.40879 | -2001.57062 |
| I-IM6                | 0.59722          | 0.65556                     | 0.49368                     | -2001.48091      | -2001.42257 | -2001.58445 |
| I-TS5                | 0.59570          | 0.65395                     | 0.49095                     | -2001.45967      | -2001.40142 | -2001.56442 |
| [Ni]-Ar              | 0.54700          | 0.59754                     | 0.45034                     | -1749.00052      | -1748.94998 | -1749.09718 |
| I-TS2'               | 0.89340          | 0.97685                     | 0.75646                     | -2747.59434      | -2747.51089 | -2747.73128 |

|                                                       |         |         |         |             |             |             |
|-------------------------------------------------------|---------|---------|---------|-------------|-------------|-------------|
| <b>II-IM0</b>                                         | 0.62215 | 0.68343 | 0.51613 | -2204.11871 | -2204.05744 | -2204.22473 |
| <b>II-TS1</b>                                         | 0.62084 | 0.68065 | 0.51776 | -2204.07798 | -2204.01817 | -2204.18106 |
| <b>II-IM1</b>                                         | 0.62158 | 0.68201 | 0.51794 | -2204.11540 | -2204.05497 | -2204.21904 |
| <b>II-IM2</b>                                         | 0.80404 | 0.87973 | 0.67798 | -2516.03979 | -2515.96411 | -2516.16585 |
| <b>II-IM3</b>                                         | 0.82967 | 0.90649 | 0.70520 | -2592.47361 | -2592.39679 | -2592.59808 |
| <b>II-TS2</b>                                         | 0.82755 | 0.90512 | 0.70182 | -2592.44389 | -2592.36632 | -2592.56962 |
| <b>II-IM4</b>                                         | 0.82992 | 0.90886 | 0.69926 | -2592.48125 | -2592.40230 | -2592.61190 |
| <b>II-TS3</b>                                         | 0.95680 | 1.04732 | 0.81822 | -3000.67797 | -3000.58745 | -3000.81655 |
| <b>II-IM5</b>                                         | 0.95802 | 1.05041 | 0.81356 | -3000.70774 | -3000.61534 | -3000.85219 |
| <b>II-IM6</b>                                         | 0.90794 | 0.99179 | 0.77515 | -2748.23425 | -2748.15040 | -2748.36704 |
| <b>II-TS4</b>                                         | 0.90617 | 0.98957 | 0.77267 | -2748.21795 | -2748.13455 | -2748.35146 |
| <b>II-IM7</b>                                         | 0.90985 | 0.99379 | 0.77079 | -2748.26870 | -2748.18476 | -2748.40776 |
| <b>Ni<sup>0</sup>(cod)<sub>2</sub>PPh<sub>3</sub></b> | 0.64076 | 0.69505 | 0.54280 | -1829.34870 | -1829.29441 | -1829.44666 |

<sup>a</sup> Zero-point energy.

<sup>b</sup> Thermal correction to enthalpy.

<sup>c</sup> Thermal correction to Gibbs free energy.

## 11. Cartesian coordinates of all stationary points

### cod

|   |            |            |             |
|---|------------|------------|-------------|
| C | 3.15588600 | 4.74138800 | -1.79630000 |
| C | 3.53116500 | 5.13769500 | -3.23949700 |
| H | 2.10939200 | 4.39989800 | -1.78412100 |
| H | 3.37694500 | 4.29191600 | -3.91165000 |
| H | 2.82127600 | 5.90823900 | -3.56163900 |
| C | 5.25314700 | 2.59349300 | -3.05829100 |
| H | 4.37826000 | 2.64888900 | -3.70822300 |
| H | 5.63463100 | 1.57074300 | -3.15777200 |
| C | 6.35333300 | 3.54650700 | -3.57011900 |
| H | 7.27151400 | 3.35466700 | -2.99827800 |
| H | 6.60266800 | 3.27441700 | -4.60730600 |
| C | 4.87888700 | 2.82499000 | -1.61253000 |
| H | 5.40847700 | 2.19707200 | -0.89603900 |
| C | 4.01444400 | 3.71245500 | -1.10485400 |
| H | 3.89637200 | 3.70885600 | -0.02048200 |
| C | 6.08467000 | 5.02885400 | -3.50434900 |
| H | 6.98790800 | 5.63564500 | -3.58076600 |
| C | 4.93046600 | 5.69370300 | -3.36886900 |
| H | 4.99810200 | 6.78045700 | -3.31892500 |
| H | 3.16580500 | 5.64697400 | -1.17449500 |

### H<sub>2</sub>O

|   |            |             |            |
|---|------------|-------------|------------|
| O | 0.59463300 | -0.78047500 | 0.00000000 |
| H | 1.56063100 | -0.72724300 | 0.00000000 |

|   |            |            |            |
|---|------------|------------|------------|
| H | 0.32235600 | 0.14788400 | 0.00000000 |
|---|------------|------------|------------|

**PhB(OH)<sub>2</sub>**

|   |             |             |             |
|---|-------------|-------------|-------------|
| B | -0.03950800 | -0.42533900 | -0.15221500 |
| O | 0.73019300  | -0.66803700 | -1.25802200 |
| H | 1.18770200  | -1.51842600 | -1.18893500 |
| O | -0.04681100 | -1.37511400 | 0.83755900  |
| H | -0.60689300 | -1.14856300 | 1.59099100  |
| C | -0.85330300 | 0.91549300  | -0.09821700 |
| C | -1.67244900 | 1.25709300  | 0.99241100  |
| C | -0.77819700 | 1.82717400  | -1.16760200 |
| C | -2.38710100 | 2.45474400  | 1.01916400  |
| H | -1.76529700 | 0.58684500  | 1.84477600  |
| C | -1.48862300 | 3.02676800  | -1.15026200 |
| H | -0.15258300 | 1.58719300  | -2.02208200 |
| C | -2.29573500 | 3.34288000  | -0.05458400 |
| H | -3.01299900 | 2.69515900  | 1.87366400  |
| H | -1.41466800 | 3.71479500  | -1.98767800 |
| H | -2.85081900 | 4.27656500  | -0.03733800 |

**B(OH)<sub>3</sub>**

|   |             |             |             |
|---|-------------|-------------|-------------|
| B | 0.11439700  | -0.43413200 | 0.02806400  |
| O | -0.49230100 | 0.76237300  | 0.31884500  |
| H | -1.45626600 | 0.73308000  | 0.27995200  |
| O | 1.48340600  | -0.44054000 | 0.07210500  |
| H | 1.83067400  | -1.31559100 | -0.14457700 |
| O | -0.53881300 | -1.60242100 | -0.29767300 |
| H | -1.50193800 | -1.53554400 | -0.31365300 |

**I-IM0**

|   |             |             |             |
|---|-------------|-------------|-------------|
| C | -1.99258100 | -2.38059700 | 0.60279400  |
| C | -2.99343200 | -3.34356800 | 0.39770000  |
| C | -0.96577000 | -2.65203600 | 1.52060700  |
| C | -2.97120600 | -4.54615200 | 1.10532400  |
| H | -3.78631200 | -3.15569700 | -0.31860200 |
| C | -0.94837700 | -3.85259500 | 2.23261200  |
| H | -0.17982900 | -1.91910600 | 1.67018800  |
| C | -1.95178300 | -4.80145500 | 2.02677700  |
| H | -3.75092300 | -5.28365400 | 0.93876900  |
| H | -0.14851500 | -4.04724000 | 2.94124900  |
| H | -1.93662200 | -5.73854200 | 2.57545300  |
| C | -3.18041700 | 0.27060200  | 0.63065000  |
| C | -3.03878800 | 1.66452100  | 0.55905900  |
| C | -4.24632000 | -0.27503800 | 1.35956400  |

|    |             |             |             |
|----|-------------|-------------|-------------|
| C  | -3.96121000 | 2.49876500  | 1.19067900  |
| H  | -2.20037900 | 2.08574700  | 0.01614600  |
| C  | -5.15989000 | 0.56215200  | 2.00088900  |
| H  | -4.36092900 | -1.35079500 | 1.43455100  |
| C  | -5.02180300 | 1.94955000  | 1.91420600  |
| H  | -3.83949100 | 3.57604600  | 1.13186500  |
| H  | -5.97936800 | 0.13002900  | 2.56826900  |
| H  | -5.73369000 | 2.59914400  | 2.41539600  |
| C  | 0.62175700  | 0.67535000  | 1.60201300  |
| C  | 1.65249100  | 0.09379300  | 1.19121100  |
| Ni | 0.25985800  | 0.11129800  | -0.31512100 |
| P  | -1.95078600 | -0.75963200 | -0.26598800 |
| C  | 2.09105600  | -0.80540300 | -1.75976700 |
| C  | 3.15433400  | -1.50591200 | -0.94219700 |
| H  | 2.73341500  | -2.40815100 | -0.49057800 |
| H  | 3.92937700  | -1.83684500 | -1.64136600 |
| C  | 2.97071200  | -0.52483800 | 1.42994000  |
| H  | 2.79979300  | -1.51251400 | 1.87658100  |
| H  | 3.51661100  | 0.07219200  | 2.16546700  |
| C  | 3.87176300  | -0.72855300 | 0.19181900  |
| C  | 0.86412200  | -1.37757400 | -1.91778600 |
| H  | 0.18615300  | -1.03635100 | -2.69177300 |
| H  | 0.61655900  | -2.30985400 | -1.41646400 |
| C  | 2.51767300  | 0.34535000  | -2.63736400 |
| H  | 2.76618300  | 1.23708000  | -2.05851100 |
| H  | 3.40500800  | 0.06063700  | -3.21502300 |
| H  | 1.71943500  | 0.62432900  | -3.32600900 |
| C  | -0.28337700 | 1.38728700  | 2.46714300  |
| C  | -0.27986300 | 2.79352400  | 2.49922200  |
| C  | -1.18106900 | 0.68458700  | 3.29174000  |
| C  | -1.14518800 | 3.47644200  | 3.35106200  |
| H  | 0.39555600  | 3.33634000  | 1.84785500  |
| C  | -2.04458200 | 1.37563600  | 4.13758700  |
| H  | -1.20032200 | -0.39905500 | 3.25479700  |
| C  | -2.02892400 | 2.77235300  | 4.17320800  |
| H  | -1.13255200 | 4.56242100  | 3.36894800  |
| H  | -2.73758300 | 0.82230100  | 4.76422500  |
| H  | -2.70736000 | 3.30828300  | 4.83026300  |
| C  | -2.80801000 | -1.12468900 | -1.85227700 |
| C  | -2.37708600 | -2.20698000 | -2.63891300 |
| C  | -3.82245800 | -0.29174700 | -2.34615700 |
| C  | -2.95067800 | -2.44922500 | -3.88674500 |
| H  | -1.60332900 | -2.87170500 | -2.26932200 |
| C  | -4.39025800 | -0.53281300 | -3.59858100 |

|   |             |             |             |
|---|-------------|-------------|-------------|
| H | -4.16835500 | 0.54905400  | -1.75518900 |
| C | -3.95732700 | -1.61043000 | -4.37285300 |
| H | -2.61180800 | -3.29435100 | -4.47911900 |
| H | -5.17547500 | 0.12234000  | -3.96479400 |
| H | -4.40268200 | -1.79797500 | -5.34544000 |
| C | 4.43182500  | 0.61740600  | -0.27660700 |
| O | 4.12630200  | 1.70293900  | 0.16785800  |
| O | 5.33641500  | 0.43050200  | -1.25201900 |
| C | 5.07337800  | -1.57171000 | 0.65631400  |
| O | 5.30199800  | -2.71482900 | 0.32564100  |
| O | 5.82775500  | -0.87354300 | 1.52015900  |
| C | 5.93170800  | 1.62482000  | -1.79724600 |
| H | 6.45315600  | 2.18194000  | -1.01557200 |
| H | 6.63643100  | 1.28156400  | -2.55406900 |
| H | 5.16647500  | 2.25917700  | -2.25064600 |
| C | 6.98279200  | -1.55784600 | 2.04972700  |
| H | 7.66628200  | -1.82961900 | 1.24190200  |
| H | 7.45730400  | -0.84867600 | 2.72726600  |
| H | 6.67914200  | -2.45700800 | 2.59090800  |
| C | -0.02753400 | 1.80431300  | -1.34530500 |
| C | -0.91180400 | 1.96494500  | -2.43152800 |
| C | 0.74414800  | 2.93999400  | -1.01879100 |
| C | -1.03293500 | 3.16785000  | -3.13840300 |
| H | -1.53594300 | 1.12909400  | -2.74125500 |
| C | 0.63644500  | 4.15274700  | -1.71002900 |
| H | 1.46734700  | 2.87578500  | -0.20693400 |
| C | -0.25915400 | 4.27419000  | -2.77669400 |
| H | -1.73200000 | 3.24315500  | -3.96985700 |
| H | 1.25173800  | 5.00292500  | -1.41962900 |
| H | -0.35077900 | 5.21301600  | -3.31746000 |

#### I-TS1

|   |             |            |             |
|---|-------------|------------|-------------|
| C | 0.79240200  | 0.93879800 | -2.38334000 |
| C | 1.43425900  | 1.24678300 | -3.59370000 |
| C | -0.57837500 | 1.20425100 | -2.24650000 |
| C | 0.71630200  | 1.82387800 | -4.64107500 |
| H | 2.49073800  | 1.03194800 | -3.71682200 |
| C | -1.29624400 | 1.77703000 | -3.29800200 |
| H | -1.08118000 | 0.95103600 | -1.31971800 |
| C | -0.64830600 | 2.08949700 | -4.49454300 |
| H | 1.22127400  | 2.06075200 | -5.57305400 |
| H | -2.36072400 | 1.95114400 | -3.18459800 |
| H | -1.20585900 | 2.53088700 | -5.31550400 |
| C | 2.56919300  | 1.58511500 | -0.16910100 |

|    |             |             |             |
|----|-------------|-------------|-------------|
| C  | 2.99540600  | 1.41338900  | 1.15750900  |
| C  | 2.78991000  | 2.81263800  | -0.80785600 |
| C  | 3.63890000  | 2.45120100  | 1.82930700  |
| H  | 2.80171400  | 0.47444100  | 1.66371100  |
| C  | 3.42723100  | 3.85236000  | -0.12895300 |
| H  | 2.45474500  | 2.96524100  | -1.82783300 |
| C  | 3.85204600  | 3.67450500  | 1.18921500  |
| H  | 3.95319200  | 2.31118700  | 2.85921100  |
| H  | 3.58676400  | 4.80274000  | -0.63019800 |
| H  | 4.33984000  | 4.48812700  | 1.71799500  |
| C  | -0.48086800 | 0.41239000  | 1.54535700  |
| C  | -1.56860000 | -0.12572900 | 1.04393500  |
| Ni | 0.37253700  | -1.00037900 | 0.55226600  |
| P  | 1.67803400  | 0.19595200  | -0.96352000 |
| C  | -1.75704800 | -1.86083700 | 0.29286500  |
| C  | -2.87084300 | -1.46882800 | -0.67410200 |
| H  | -2.43658100 | -1.00453900 | -1.56149400 |
| H  | -3.41333100 | -2.35915800 | -1.00199600 |
| C  | -2.96600400 | 0.43020200  | 0.91988800  |
| H  | -2.90027200 | 1.45937100  | 0.55446100  |
| H  | -3.44085300 | 0.47304800  | 1.90382700  |
| C  | -3.82569500 | -0.44651800 | -0.02205100 |
| C  | -0.57910900 | -2.45279200 | -0.37408200 |
| H  | -0.26701800 | -3.43467300 | -0.03101100 |
| H  | -0.51531700 | -2.31430200 | -1.45272800 |
| C  | -2.20304900 | -2.66569500 | 1.51576400  |
| H  | -2.92749100 | -2.13243400 | 2.13372800  |
| H  | -2.66058300 | -3.60817200 | 1.19075700  |
| H  | -1.33769200 | -2.90345200 | 2.14079200  |
| C  | -0.17917700 | 1.67732400  | 2.18878700  |
| C  | 0.08544500  | 1.74357600  | 3.56952000  |
| C  | -0.08609100 | 2.86105300  | 1.43004700  |
| C  | 0.42462100  | 2.95543900  | 4.17068200  |
| H  | 0.02580000  | 0.83640400  | 4.16378300  |
| C  | 0.26238000  | 4.06622400  | 2.03466200  |
| H  | -0.26460200 | 2.82006700  | 0.36057100  |
| C  | 0.51832800  | 4.12240900  | 3.40799300  |
| H  | 0.62265500  | 2.98583900  | 5.23873900  |
| H  | 0.33960000  | 4.96529400  | 1.42960700  |
| H  | 0.79297500  | 5.06293400  | 3.87636900  |
| C  | 2.97905200  | -0.82508000 | -1.74597400 |
| C  | 2.58765000  | -1.81226700 | -2.66594800 |
| C  | 4.32517200  | -0.73119700 | -1.37305300 |
| C  | 3.53077100  | -2.68434900 | -3.20585400 |



|   |             |             |             |
|---|-------------|-------------|-------------|
| H | 1.54531300  | -1.89797100 | -2.95861100 |
| C | 5.26652200  | -1.61276500 | -1.90969900 |
| H | 4.63992800  | 0.02325800  | -0.66020300 |
| C | 4.87325400  | -2.58982600 | -2.82491100 |
| H | 3.21784800  | -3.44119500 | -3.91930100 |
| H | 6.30790600  | -1.53214500 | -1.61170600 |
| H | 5.60651200  | -3.27449200 | -3.24077400 |
| C | -4.96265200 | -1.13592900 | 0.74639600  |
| O | -5.18855500 | -1.03324300 | 1.93375000  |
| O | -5.69778400 | -1.88366000 | -0.09103000 |
| C | -4.48169800 | 0.43633100  | -1.08754300 |
| O | -4.15780000 | 0.49619500  | -2.25540300 |
| O | -5.45500700 | 1.18143500  | -0.54176500 |
| C | -6.81704100 | -2.57753900 | 0.49739100  |
| H | -7.51870600 | -1.86457900 | 0.93652600  |
| H | -7.28855900 | -3.11978700 | -0.32172300 |
| H | -6.47319400 | -3.27326900 | 1.26625800  |
| C | -6.13528000 | 2.09038000  | -1.43254200 |
| H | -6.60795200 | 1.54126000  | -2.25014400 |
| H | -6.88906700 | 2.58714500  | -0.82241400 |
| H | -5.43316900 | 2.82172700  | -1.84025100 |
| C | 1.72878600  | -2.06072700 | 1.42888300  |
| C | 2.49963500  | -3.03942700 | 0.77930100  |
| C | 2.02245100  | -1.79786300 | 2.78023200  |
| C | 3.53501000  | -3.71049900 | 1.43765500  |
| H | 2.30717800  | -3.27359600 | -0.26312500 |
| C | 3.05049100  | -2.47430700 | 3.44937800  |
| H | 1.45885000  | -1.04148400 | 3.31995100  |
| C | 3.81472300  | -3.43118400 | 2.77812500  |
| H | 4.12381700  | -4.45188200 | 0.90185700  |
| H | 3.25688200  | -2.24637100 | 4.49292500  |
| H | 4.61709300  | -3.95331300 | 3.29266700  |

#### I-IM1

|   |            |             |             |
|---|------------|-------------|-------------|
| C | 1.00708500 | -2.46222600 | 0.05453900  |
| C | 1.71150700 | -3.30105700 | -0.81996700 |
| C | 0.95384400 | -2.80419900 | 1.41347600  |
| C | 2.37745200 | -4.43527600 | -0.34004300 |
| H | 1.77152500 | -3.06567700 | -1.87888000 |
| C | 1.60857200 | -3.94293200 | 1.89414300  |
| H | 0.40822800 | -2.17294400 | 2.11033000  |
| C | 2.32863400 | -4.75969300 | 1.01861700  |
| H | 2.93352200 | -5.06557000 | -1.03015300 |
| H | 1.56166000 | -4.18623500 | 2.95285500  |

|    |             |             |             |
|----|-------------|-------------|-------------|
| H  | 2.84214700  | -5.64232300 | 1.38999600  |
| C  | -0.81930100 | 1.57766700  | 1.30100300  |
| C  | -1.50014900 | 2.77295100  | 0.98889500  |
| C  | 0.21279400  | 1.63866900  | 2.25628100  |
| C  | -1.16261800 | 3.97341100  | 1.61324700  |
| H  | -2.29251100 | 2.75082600  | 0.24702300  |
| C  | 0.54558200  | 2.83940600  | 2.88313000  |
| H  | 0.76056800  | 0.73364600  | 2.49895800  |
| C  | -0.13693900 | 4.01569900  | 2.56202900  |
| H  | -1.70018600 | 4.88211200  | 1.35442100  |
| H  | 1.34388600  | 2.85648100  | 3.62011200  |
| H  | 0.12765400  | 4.95299400  | 3.04294900  |
| C  | -1.34731700 | -1.68878500 | -1.17031500 |
| C  | -1.12376100 | 0.31557600  | 0.60812900  |
| C  | -2.34574300 | -0.24732100 | 0.54707300  |
| C  | -2.54397700 | -1.52477400 | -0.23713600 |
| C  | -3.69288500 | 0.21357100  | 1.04535400  |
| C  | -4.65154200 | -0.16210800 | -0.13135300 |
| C  | -3.90048900 | -1.27010400 | -0.96063600 |
| H  | -1.42935000 | -1.04297100 | -2.05840400 |
| H  | -1.14826300 | -2.71681700 | -1.47615700 |
| H  | -3.97822000 | -0.35531600 | 1.93897400  |
| H  | -3.75612900 | 1.27268900  | 1.28560300  |
| H  | -3.71989100 | -0.89899100 | -1.97221500 |
| H  | -4.50551600 | -2.17338600 | -1.04954700 |
| C  | -5.99857200 | -0.56313500 | 0.45365400  |
| O  | -6.88276200 | 0.23066600  | 0.71071400  |
| O  | -6.06881600 | -1.87328200 | 0.73461800  |
| C  | -4.88912900 | 1.04889900  | -1.03369200 |
| O  | -4.37986800 | 2.14406600  | -0.90870200 |
| O  | -5.71728600 | 0.72824300  | -2.04067400 |
| C  | -7.27321500 | -2.31040800 | 1.39583600  |
| H  | -8.14652500 | -2.11580600 | 0.76890900  |
| H  | -7.14866200 | -3.38167300 | 1.55218700  |
| H  | -7.39135400 | -1.79718100 | 2.35317400  |
| C  | -6.00219500 | 1.78054200  | -2.98247300 |
| H  | -6.68644300 | 1.34535500  | -3.71085500 |
| H  | -6.47388100 | 2.62783500  | -2.47891200 |
| H  | -5.08522000 | 2.11369100  | -3.47546500 |
| C  | -2.67007500 | -2.74112000 | 0.70233200  |
| H  | -3.51059500 | -2.62952900 | 1.39328600  |
| H  | -2.84185500 | -3.65220400 | 0.11681700  |
| H  | -1.75563000 | -2.87836000 | 1.28405400  |
| Ni | 0.22332600  | -0.75495200 | -0.44211800 |

|   |            |             |             |
|---|------------|-------------|-------------|
| P | 2.38339600 | 0.35463000  | -0.29710400 |
| C | 3.40866400 | 0.05817900  | 1.18494700  |
| C | 3.62982000 | 1.07185900  | 2.12985800  |
| C | 3.88081700 | -1.23863100 | 1.44999000  |
| C | 4.32080900 | 0.79673800  | 3.31080000  |
| H | 3.26055200 | 2.07380500  | 1.94712800  |
| C | 4.57650600 | -1.50591700 | 2.62853600  |
| H | 3.70770200 | -2.03789600 | 0.73921700  |
| C | 4.79652100 | -0.49145000 | 3.56328100  |
| H | 4.48564600 | 1.59182400  | 4.03220900  |
| H | 4.93655800 | -2.51286300 | 2.81771700  |
| C | 2.50829000 | 2.15032200  | -0.63953100 |
| C | 1.34125200 | 2.84846400  | -0.97070900 |
| C | 3.74159600 | 2.82153400  | -0.64331600 |
| C | 1.39950900 | 4.20864100  | -1.28202000 |
| H | 0.39021000 | 2.32940100  | -0.97038900 |
| C | 3.79715100 | 4.17877300  | -0.95393700 |
| H | 4.65272500 | 2.28280500  | -0.40235100 |
| C | 2.62530700 | 4.87482200  | -1.26958000 |
| H | 0.48707100 | 4.74501400  | -1.52441800 |
| H | 4.75329900 | 4.69400100  | -0.95186600 |
| C | 3.32026300 | -0.37037500 | -1.70092700 |
| C | 2.59568000 | -0.61167800 | -2.87928300 |
| C | 4.68648100 | -0.67448200 | -1.66302400 |
| C | 3.22455100 | -1.15315800 | -3.99975500 |
| H | 1.53371900 | -0.37727700 | -2.91436200 |
| C | 5.31265800 | -1.22570800 | -2.78286500 |
| H | 5.26025000 | -0.49355300 | -0.76072100 |
| C | 4.58527200 | -1.46788500 | -3.95009500 |
| H | 2.65310000 | -1.33794200 | -4.90466100 |
| H | 6.37134500 | -1.46533500 | -2.74214300 |
| H | 2.67149700 | 5.93347300  | -1.50806800 |
| H | 5.07563900 | -1.90035800 | -4.81722600 |
| H | 5.33525300 | -0.70389400 | 4.48214000  |

### **I-IM2**

|   |             |            |             |
|---|-------------|------------|-------------|
| C | -1.96415400 | 2.54812500 | 0.01546200  |
| C | -2.72216500 | 3.16269400 | -1.17535800 |
| H | -2.30329000 | 1.51733300 | 0.17167600  |
| H | -2.50442100 | 2.60068800 | -2.08461100 |
| H | -3.79231500 | 3.02463300 | -0.99220500 |
| C | 0.05377800  | 3.14849700 | -2.49699700 |
| H | -0.76736200 | 2.55058800 | -2.89562000 |
| H | 0.92614400  | 2.90994300 | -3.11496200 |

|   |             |             |             |
|---|-------------|-------------|-------------|
| C | -0.23952400 | 4.64930900  | -2.68909500 |
| H | 0.64904500  | 5.21736300  | -2.37980600 |
| H | -0.34421400 | 4.85163300  | -3.76603800 |
| C | 0.37317300  | 2.77457200  | -1.06863600 |
| H | 1.43433400  | 2.74748700  | -0.83267600 |
| C | -0.46281800 | 2.53294900  | -0.04515100 |
| H | 0.00597800  | 2.29349200  | 0.90688700  |
| C | -1.42703800 | 5.23762900  | -1.97153700 |
| H | -1.42876700 | 6.32871700  | -1.96982800 |
| C | -2.45422400 | 4.63872300  | -1.35558200 |
| H | -3.18738100 | 5.29454200  | -0.88513100 |
| H | -2.25373800 | 3.08101700  | 0.93109100  |
| C | 1.02047100  | -1.98819300 | -1.64115900 |
| C | 1.59154600  | -2.00604800 | -2.92018900 |
| C | 0.99886800  | -3.18118200 | -0.90335900 |
| C | 2.16418000  | -3.17624000 | -3.43275000 |
| H | 1.61000200  | -1.10608800 | -3.52743700 |
| C | 1.55495200  | -4.35645200 | -1.41868300 |
| H | 0.54844800  | -3.19337100 | 0.08469400  |
| C | 2.14848500  | -4.35605800 | -2.68337600 |
| H | 2.61880200  | -3.16559500 | -4.42071000 |
| H | 1.53213600  | -5.26806900 | -0.82643400 |
| H | 2.58670800  | -5.26578400 | -3.08461600 |
| C | -0.61081200 | -0.66155200 | 2.23203600  |
| C | -1.25019500 | 0.32476700  | 3.01272200  |
| C | 0.38158600  | -1.44926200 | 2.84935800  |
| C | -0.90483900 | 0.51455700  | 4.35107800  |
| H | -2.02675200 | 0.93238900  | 2.55986300  |
| C | 0.71712900  | -1.26558100 | 4.19028300  |
| H | 0.89902300  | -2.19895200 | 2.25935400  |
| C | 0.08157200  | -0.27691100 | 4.94795900  |
| H | -1.40934000 | 1.28298000  | 4.93119300  |
| H | 1.48814900  | -1.88509600 | 4.63957400  |
| H | 0.35182000  | -0.12480000 | 5.98890800  |
| C | -1.23640900 | -0.52018700 | -1.85720800 |
| C | -0.92030500 | -0.82898800 | 0.80733700  |
| C | -2.11557800 | -1.21978000 | 0.33445500  |
| C | -2.35993600 | -1.28409700 | -1.15874100 |
| C | -3.42250900 | -1.49334600 | 1.04002600  |
| C | -4.48038100 | -0.81754100 | 0.10533700  |
| C | -3.76123400 | -0.60929200 | -1.27710700 |
| H | -1.40992700 | 0.56175300  | -1.85280300 |
| H | -1.02180100 | -0.85920900 | -2.87193700 |
| H | -3.61573200 | -2.57163800 | 1.09239300  |

|    |             |             |             |
|----|-------------|-------------|-------------|
| H  | -3.48133300 | -1.09126300 | 2.04986800  |
| H  | -3.64154900 | 0.46034800  | -1.45447100 |
| H  | -4.35539300 | -1.01231300 | -2.09841100 |
| C  | -5.73510500 | -1.68240400 | 0.07413400  |
| O  | -6.62919100 | -1.59594500 | 0.89414100  |
| O  | -5.71744100 | -2.59270400 | -0.91092200 |
| C  | -4.91929800 | 0.53043900  | 0.68680300  |
| O  | -4.57653900 | 0.99550700  | 1.75374600  |
| O  | -5.75312500 | 1.15801800  | -0.16125500 |
| C  | -6.83640700 | -3.50075800 | -0.94823200 |
| H  | -7.76924600 | -2.95152500 | -1.09631200 |
| H  | -6.64623500 | -4.16254300 | -1.79290800 |
| H  | -6.89684500 | -4.07451400 | -0.02042300 |
| C  | -6.30153300 | 2.40576800  | 0.30532600  |
| H  | -6.87687600 | 2.80541700  | -0.52965500 |
| H  | -6.95317900 | 2.23170300  | 1.16552800  |
| H  | -5.50738400 | 3.10006300  | 0.58730700  |
| C  | -2.43740300 | -2.73890600 | -1.66160000 |
| H  | -3.22256100 | -3.30014900 | -1.14836900 |
| H  | -2.67015100 | -2.75437600 | -2.73318500 |
| H  | -1.48627800 | -3.25322900 | -1.51216500 |
| Ni | 0.36263200  | -0.41901900 | -0.71254100 |
| P  | 2.60390000  | 0.10389500  | 0.20366000  |
| C  | 3.51714600  | -1.22232700 | 1.08428600  |
| C  | 3.83528900  | -1.14720200 | 2.44666000  |
| C  | 3.85718800  | -2.38018100 | 0.36421200  |
| C  | 4.47345700  | -2.21535100 | 3.08068000  |
| H  | 3.58723400  | -0.25939800 | 3.01616700  |
| C  | 4.49397500  | -3.44399300 | 1.00143400  |
| H  | 3.63178400  | -2.44664000 | -0.69292700 |
| C  | 4.79981300  | -3.36726100 | 2.36263100  |
| H  | 4.71685100  | -2.14279200 | 4.13681500  |
| H  | 4.74747400  | -4.33326300 | 0.43166000  |
| C  | 2.81284600  | 1.59920200  | 1.25527300  |
| C  | 2.03577600  | 1.71529400  | 2.41980800  |
| C  | 3.67435600  | 2.65000300  | 0.90581400  |
| C  | 2.13394500  | 2.84824400  | 3.22734000  |
| H  | 1.35276500  | 0.92282200  | 2.69302800  |
| C  | 3.75770500  | 3.78932600  | 1.70863200  |
| H  | 4.27602100  | 2.58668300  | 0.00674700  |
| C  | 2.99132300  | 3.89127400  | 2.87110300  |
| H  | 1.52849300  | 2.91589500  | 4.12604000  |
| H  | 4.42432200  | 4.59785600  | 1.42290500  |
| C  | 3.68722700  | 0.44754800  | -1.23680200 |

|   |            |             |             |
|---|------------|-------------|-------------|
| C | 3.09560700 | 0.91012700  | -2.42014800 |
| C | 5.08105100 | 0.29800900  | -1.18324500 |
| C | 3.88036700 | 1.23203200  | -3.52805900 |
| H | 2.01721800 | 1.00969400  | -2.47480400 |
| C | 5.86510200 | 0.61180600  | -2.29393800 |
| H | 5.55176000 | -0.06272600 | -0.27477600 |
| C | 5.26728100 | 1.08255800  | -3.46618600 |
| H | 3.40920500 | 1.58815800  | -4.43949500 |
| H | 6.94332200 | 0.49177400  | -2.24288900 |
| H | 3.05935000 | 4.77893800  | 3.49307400  |
| H | 5.87998600 | 1.32613000  | -4.32922900 |
| H | 5.29387800 | -4.19777100 | 2.85831800  |

**I-TS2**

|   |             |             |             |
|---|-------------|-------------|-------------|
| C | -1.97346700 | 2.51926800  | 0.63236200  |
| C | -2.65271100 | 3.35187400  | -0.47118400 |
| H | -2.31826700 | 1.47959900  | 0.57234200  |
| H | -2.40330200 | 2.94284600  | -1.45104500 |
| H | -3.73409800 | 3.22234100  | -0.36385900 |
| C | 0.19330900  | 3.46020100  | -1.63433300 |
| H | -0.61503800 | 2.94592700  | -2.15582400 |
| H | 1.09212900  | 3.28672000  | -2.23698800 |
| C | -0.06587200 | 4.97997300  | -1.62275900 |
| H | 0.82057200  | 5.47923900  | -1.20725000 |
| H | -0.13051600 | 5.33405700  | -2.66287300 |
| C | 0.42553800  | 2.88013000  | -0.25876900 |
| H | 1.46879400  | 2.81281700  | 0.04265500  |
| C | -0.47148500 | 2.50237700  | 0.66609800  |
| H | -0.06390100 | 2.12220200  | 1.60032400  |
| C | -1.26716200 | 5.48299100  | -0.86331300 |
| H | -1.24061500 | 6.55844200  | -0.68194200 |
| C | -2.33468900 | 4.82676500  | -0.39108000 |
| H | -3.06805200 | 5.42188500  | 0.15357500  |
| H | -2.32159600 | 2.87651500  | 1.61071000  |
| C | 0.72409200  | -0.84784600 | -2.42758000 |
| C | 1.32192900  | 0.01567800  | -3.36242000 |
| C | 0.92195100  | -2.22954700 | -2.56551700 |
| C | 2.14424600  | -0.48782400 | -4.37165500 |
| H | 1.15343200  | 1.08665900  | -3.29704400 |
| C | 1.73853100  | -2.73197300 | -3.58381700 |
| H | 0.46867800  | -2.91333400 | -1.85682800 |
| C | 2.35682400  | -1.86488000 | -4.48828500 |
| H | 2.61970600  | 0.19788100  | -5.06790800 |
| H | 1.89520500  | -3.80493300 | -3.66281100 |

|    |             |             |             |
|----|-------------|-------------|-------------|
| H  | 2.99055100  | -2.25639600 | -5.27867300 |
| C  | -0.65925300 | -1.24938700 | 2.05656500  |
| C  | -1.29321600 | -0.40426100 | 2.99374000  |
| C  | 0.26380800  | -2.19187700 | 2.55179500  |
| C  | -1.00540200 | -0.49145200 | 4.35636500  |
| H  | -2.02208500 | 0.31683600  | 2.63982400  |
| C  | 0.54635000  | -2.28255100 | 3.91475400  |
| H  | 0.77168300  | -2.84706100 | 1.85273200  |
| C  | -0.07850900 | -1.42694200 | 4.82657100  |
| H  | -1.50831700 | 0.17370100  | 5.05421700  |
| H  | 1.26725100  | -3.01728700 | 4.26286600  |
| H  | 0.15179000  | -1.48908200 | 5.88631700  |
| C  | -1.24797800 | -0.06520400 | -1.97159100 |
| C  | -0.89162700 | -1.08637400 | 0.61216300  |
| C  | -2.08673900 | -1.30809300 | 0.03798000  |
| C  | -2.32873800 | -0.99447000 | -1.42767700 |
| C  | -3.41308900 | -1.71147300 | 0.64602500  |
| C  | -4.45028600 | -0.80225500 | -0.09087700 |
| C  | -3.71951900 | -0.28454900 | -1.38243600 |
| H  | -1.33275000 | 0.94740000  | -1.56477500 |
| H  | -1.27119000 | 0.00831400  | -3.05535100 |
| H  | -3.63566100 | -2.76383600 | 0.43146200  |
| H  | -3.46860300 | -1.56930000 | 1.72419400  |
| H  | -3.58611000 | 0.79452300  | -1.30275500 |
| H  | -4.31122400 | -0.47240900 | -2.27988800 |
| C  | -5.72561000 | -1.59966400 | -0.33882600 |
| O  | -6.67629000 | -1.60821900 | 0.41950000  |
| O  | -5.65874900 | -2.34854400 | -1.45066700 |
| C  | -4.87059600 | 0.37288400  | 0.79895700  |
| O  | -4.57918700 | 0.52801200  | 1.96616500  |
| O  | -5.62968200 | 1.23864700  | 0.10396300  |
| C  | -6.78652900 | -3.21233800 | -1.69720100 |
| H  | -7.69595500 | -2.62321400 | -1.83707600 |
| H  | -6.54291900 | -3.75743200 | -2.60900000 |
| H  | -6.92677300 | -3.90586600 | -0.86464300 |
| C  | -6.16854600 | 2.34409200  | 0.85345600  |
| H  | -6.67813700 | 2.97374500  | 0.12419200  |
| H  | -6.87857300 | 1.98118900  | 1.60131500  |
| H  | -5.37369100 | 2.90416200  | 1.35019200  |
| C  | -2.45325700 | -2.27698500 | -2.27532400 |
| H  | -3.30592600 | -2.87804700 | -1.95227900 |
| H  | -2.61171000 | -2.02179100 | -3.33018600 |
| H  | -1.55554000 | -2.89062600 | -2.20548700 |
| Ni | 0.37904600  | -0.16458700 | -0.65315900 |

|   |            |             |             |
|---|------------|-------------|-------------|
| P | 2.59955200 | -0.11176500 | 0.29831700  |
| C | 3.21900100 | -1.70224800 | 0.97000100  |
| C | 3.89268900 | -1.79201800 | 2.19483600  |
| C | 2.97881100 | -2.87250700 | 0.23260000  |
| C | 4.30974300 | -3.03357200 | 2.67871900  |
| H | 4.08502400 | -0.89836000 | 2.77730100  |
| C | 3.40269300 | -4.11028500 | 0.71493300  |
| H | 2.46412300 | -2.80971800 | -0.71848700 |
| C | 4.06188400 | -4.19493200 | 1.94452400  |
| H | 4.82594600 | -3.09121500 | 3.63265300  |
| H | 3.21030000 | -5.00848500 | 0.13526500  |
| C | 2.92490600 | 1.07793900  | 1.65831000  |
| C | 2.02497400 | 1.08764000  | 2.73681400  |
| C | 4.01373500 | 1.96042100  | 1.66724500  |
| C | 2.21144800 | 1.96685400  | 3.80265500  |
| H | 1.18279300 | 0.40585500  | 2.74147200  |
| C | 4.18843100 | 2.84977100  | 2.72990200  |
| H | 4.72339300 | 1.95783800  | 0.84753200  |
| C | 3.29104600 | 2.85406700  | 3.79956300  |
| H | 1.50867200 | 1.96092900  | 4.63042000  |
| H | 5.03222600 | 3.53388500  | 2.72295200  |
| C | 3.83399400 | 0.32857500  | -0.99081600 |
| C | 3.68799500 | 1.55912900  | -1.65238900 |
| C | 4.86119700 | -0.53555800 | -1.39025900 |
| C | 4.55919300 | 1.92598400  | -2.67552700 |
| H | 2.89135000 | 2.23388600  | -1.36329700 |
| C | 5.72219000 | -0.17527400 | -2.43000100 |
| H | 4.99167500 | -1.49166200 | -0.89659600 |
| C | 5.57689500 | 1.05463300  | -3.07293500 |
| H | 4.43430100 | 2.88473300  | -3.17061300 |
| H | 6.51166500 | -0.85745200 | -2.73209300 |
| H | 3.43132700 | 3.54614300  | 4.62475400  |
| H | 6.24958600 | 1.33326500  | -3.87873600 |
| H | 4.38435800 | -5.15973800 | 2.32486600  |

### I-IM3

|   |             |            |             |
|---|-------------|------------|-------------|
| C | -1.77059200 | 2.51552000 | 0.76550500  |
| C | -2.14910500 | 3.79086700 | -0.00741200 |
| H | -2.18247300 | 1.63864300 | 0.25154700  |
| H | -1.67819700 | 3.78048600 | -0.99225700 |
| H | -3.22852300 | 3.75690200 | -0.19186800 |
| C | 0.90770500  | 4.06600800 | -0.36385600 |
| H | 0.23126900  | 3.99219700 | -1.21542100 |
| H | 1.91893600  | 4.07125900 | -0.78539600 |



|   |             |             |             |
|---|-------------|-------------|-------------|
| C | 0.69402200  | 5.41422500  | 0.34839100  |
| H | 1.41645100  | 5.49609400  | 1.17325200  |
| H | 0.96293000  | 6.22606700  | -0.34462700 |
| C | 0.78702100  | 2.87357900  | 0.55535900  |
| H | 1.73455200  | 2.49278300  | 0.93190900  |
| C | -0.31121900 | 2.25357400  | 1.01421800  |
| H | -0.13819900 | 1.42448600  | 1.69559900  |
| C | -0.67490300 | 5.70396000  | 0.90681800  |
| H | -0.69729900 | 6.59791800  | 1.53209300  |
| C | -1.84006800 | 5.06057300  | 0.75450500  |
| H | -2.69202100 | 5.48146100  | 1.28935000  |
| H | -2.27712100 | 2.52822800  | 1.74031400  |
| C | -0.38080000 | 0.28067400  | -2.76825400 |
| C | 0.34258600  | 1.49137200  | -2.92628400 |
| C | 0.30638000  | -0.91529300 | -3.08817000 |
| C | 1.64168300  | 1.51247800  | -3.42865500 |
| H | -0.15519200 | 2.42550400  | -2.68692200 |
| C | 1.61048700  | -0.88552100 | -3.60975000 |
| H | -0.18939100 | -1.86952700 | -2.98053200 |
| C | 2.27639100  | 0.32157600  | -3.80026200 |
| H | 2.15942200  | 2.46044700  | -3.53523400 |
| H | 2.09961300  | -1.82259600 | -3.85865200 |
| H | 3.28822100  | 0.33793900  | -4.19057200 |
| C | -0.80391900 | -1.46294500 | 1.49679500  |
| C | -1.32918900 | -0.76797700 | 2.60707200  |
| C | 0.00857800  | -2.58377500 | 1.76418400  |
| C | -1.03833000 | -1.16361700 | 3.91449400  |
| H | -1.99014900 | 0.07349800  | 2.43415900  |
| C | 0.29452100  | -2.98300000 | 3.06944700  |
| H | 0.42732600  | -3.13751900 | 0.93127600  |
| C | -0.21905600 | -2.26959800 | 4.15688200  |
| H | -1.45844400 | -0.60533900 | 4.74779400  |
| H | 0.93007600  | -3.84912000 | 3.23600400  |
| H | 0.01308400  | -2.57180100 | 5.17410800  |
| C | -1.87095900 | 0.41179500  | -2.50027200 |
| C | -1.02844100 | -1.00580300 | 0.10611500  |
| C | -2.25325500 | -1.13061600 | -0.44068000 |
| C | -2.70028800 | -0.70618100 | -1.84106700 |
| C | -3.50340700 | -1.66726700 | 0.24034200  |
| C | -4.61876100 | -0.68143400 | -0.21047700 |
| C | -4.13314400 | -0.13421200 | -1.59348600 |
| H | -2.00108900 | 1.31601500  | -1.89881300 |
| H | -2.34870700 | 0.63345200  | -3.46669500 |
| H | -3.75033400 | -2.67132300 | -0.12253300 |

|    |             |             |             |
|----|-------------|-------------|-------------|
| H  | -3.43146600 | -1.70802700 | 1.32515000  |
| H  | -4.11119600 | 0.95517100  | -1.55952000 |
| H  | -4.82214600 | -0.41503400 | -2.39203300 |
| C  | -5.96612500 | -1.38921400 | -0.26355200 |
| O  | -6.86229900 | -1.23656700 | 0.54412900  |
| O  | -6.03355400 | -2.25742500 | -1.28804200 |
| C  | -4.77935800 | 0.44076300  | 0.82588400  |
| O  | -4.40813900 | 0.39314700  | 1.97989200  |
| O  | -5.41771300 | 1.50146200  | 0.30266500  |
| C  | -7.23473900 | -3.04995000 | -1.36160800 |
| H  | -8.10807400 | -2.41042000 | -1.51124700 |
| H  | -7.09719400 | -3.70971800 | -2.21796600 |
| H  | -7.36497000 | -3.63345200 | -0.44712700 |
| C  | -5.69490900 | 2.57797600  | 1.21693100  |
| H  | -6.15541000 | 3.36310900  | 0.61717100  |
| H  | -6.38435300 | 2.24432600  | 1.99707000  |
| H  | -4.77514700 | 2.94136600  | 1.67959000  |
| C  | -2.84255300 | -1.94824100 | -2.75699100 |
| H  | -3.67030100 | -2.57980900 | -2.42394700 |
| H  | -3.05880100 | -1.64422000 | -3.78832700 |
| H  | -1.94478500 | -2.56931100 | -2.76401800 |
| Ni | 0.54657500  | -0.11551200 | -0.73129200 |
| P  | 2.69566100  | -0.44569900 | 0.09038500  |
| C  | 3.08737300  | -2.23610400 | 0.21627200  |
| C  | 3.90853600  | -2.76419500 | 1.22065000  |
| C  | 2.52294700  | -3.10268000 | -0.73258000 |
| C  | 4.15549200  | -4.13723200 | 1.27791200  |
| H  | 4.34899400  | -2.10722200 | 1.96283800  |
| C  | 2.78145500  | -4.47228600 | -0.68242200 |
| H  | 1.86890300  | -2.69953100 | -1.49803400 |
| C  | 3.59443500  | -4.99337700 | 0.32773200  |
| H  | 4.78679300  | -4.53708000 | 2.06620400  |
| H  | 2.33723900  | -5.13276100 | -1.42157800 |
| C  | 3.13737600  | 0.20544000  | 1.75333900  |
| C  | 2.16002600  | 0.15663000  | 2.75869600  |
| C  | 4.40561300  | 0.72200200  | 2.05866500  |
| C  | 2.44517600  | 0.61428100  | 4.04456200  |
| H  | 1.17825000  | -0.24025700 | 2.53597200  |
| C  | 4.68585700  | 1.18620800  | 3.34524400  |
| H  | 5.17515900  | 0.76157500  | 1.29583300  |
| C  | 3.70804200  | 1.13182400  | 4.34125400  |
| H  | 1.67691900  | 0.56674400  | 4.81038100  |
| H  | 5.67114200  | 1.58496500  | 3.56980900  |
| C  | 4.05192900  | 0.21169100  | -0.96427000 |

|   |            |             |             |
|---|------------|-------------|-------------|
| C | 4.11473800 | 1.59944400  | -1.17302000 |
| C | 4.97564600 | -0.61498800 | -1.61429100 |
| C | 5.08649800 | 2.14724900  | -2.00697800 |
| H | 3.40049700 | 2.25233700  | -0.68159800 |
| C | 5.94119200 | -0.06535300 | -2.46282700 |
| H | 4.94477500 | -1.68833300 | -1.46240000 |
| C | 6.00001400 | 1.31438000  | -2.66162100 |
| H | 5.12544200 | 3.22276000  | -2.15457400 |
| H | 6.64987500 | -0.71924200 | -2.96314200 |
| H | 3.92920300 | 1.49264000  | 5.34164400  |
| H | 6.75205700 | 1.73992600  | -3.31951900 |
| H | 3.78686600 | -6.06118200 | 0.37584800  |

**I-IM4**

|   |             |            |             |
|---|-------------|------------|-------------|
| O | 0.88624600  | 1.80381300 | -2.12438400 |
| C | -0.71098700 | 1.22557800 | 2.54400700  |
| C | -1.48751600 | 2.55690000 | 2.62026000  |
| H | -1.33048400 | 0.48916800 | 2.02244100  |
| H | -1.73179800 | 2.91060800 | 1.61832800  |
| H | -2.44797100 | 2.33897600 | 3.10004800  |
| C | 0.66338800  | 3.51582500 | 0.66018700  |
| H | -0.36942700 | 3.35182900 | 0.35166200  |
| H | 1.20548600  | 3.81344600 | -0.24512200 |
| C | 0.74796900  | 4.69702300 | 1.64898600  |
| H | 1.80761300  | 4.94796000 | 1.79410600  |
| H | 0.30578300  | 5.58631700 | 1.17404700  |
| C | 1.28556300  | 2.24739000 | 1.19522400  |
| H | 2.37265800  | 2.23150900 | 1.15876200  |
| C | 0.68388100  | 1.25911000 | 1.94244200  |
| H | 1.35608800  | 0.51531500 | 2.36583600  |
| C | 0.13585600  | 4.50608700 | 3.01440300  |
| H | 0.51638200  | 5.20015700 | 3.76495100  |
| C | -0.78513000 | 3.62440300 | 3.42390400  |
| H | -1.05696300 | 3.65650900 | 4.47948000  |
| H | -0.59831700 | 0.84117200 | 3.56676000  |
| C | -3.19752500 | 2.47322400 | -1.19362200 |
| C | -4.36220000 | 2.82799500 | -0.49465200 |
| C | -2.83425300 | 3.25290400 | -2.30289100 |
| C | -5.14327400 | 3.91362400 | -0.89362500 |
| H | -4.65207600 | 2.24123500 | 0.37143200  |
| C | -3.61048300 | 4.34106900 | -2.70639600 |
| H | -1.93671500 | 3.00521000 | -2.86347900 |
| C | -4.77074800 | 4.67482000 | -2.00351000 |
| H | -6.03981800 | 4.16665700 | -0.33424600 |

|   |             |             |             |
|---|-------------|-------------|-------------|
| H | -3.30769300 | 4.93018500  | -3.56765400 |
| H | -5.37457000 | 5.52249900  | -2.31437200 |
| C | 0.03068700  | -2.26621800 | 0.39896100  |
| C | -0.15174900 | -2.42764900 | 1.78894400  |
| C | 0.73267800  | -3.28121800 | -0.27930000 |
| C | 0.34166200  | -3.54345800 | 2.46349700  |
| H | -0.70607000 | -1.67112300 | 2.33400900  |
| C | 1.23638200  | -4.39472100 | 0.39592300  |
| H | 0.88546000  | -3.18935400 | -1.34890300 |
| C | 1.04782000  | -4.53495300 | 1.77368600  |
| H | 0.17410800  | -3.64005100 | 3.53350700  |
| H | 1.77846600  | -5.15511400 | -0.16021600 |
| H | 1.44063100  | -5.40051800 | 2.29945200  |
| C | -2.37032300 | 1.29852600  | -0.73340300 |
| C | -0.50478600 | -1.07224600 | -0.30045800 |
| C | -1.76160500 | -1.16710000 | -0.78265000 |
| C | -2.59270400 | -0.05379500 | -1.46122300 |
| C | -2.67309000 | -2.38055500 | -0.66297500 |
| C | -4.04444500 | -1.75574100 | -0.35788100 |
| C | -4.07118600 | -0.53964400 | -1.32014500 |
| H | -1.30783200 | 1.54285000  | -0.82675400 |
| H | -2.55927500 | 1.13236700  | 0.32633900  |
| H | -2.75861400 | -2.92190400 | -1.61336200 |
| H | -2.36349500 | -3.09066000 | 0.10293200  |
| H | -4.75311700 | 0.23907300  | -0.98219200 |
| H | -4.43638700 | -0.89173300 | -2.28980500 |
| C | -5.20838100 | -2.68829900 | -0.67381000 |
| O | -5.17300400 | -3.60134200 | -1.47214000 |
| O | -6.31411800 | -2.33486700 | 0.00693200  |
| C | -4.09833700 | -1.41089200 | 1.13327600  |
| O | -3.83667800 | -2.21357300 | 2.00651000  |
| O | -4.46896600 | -0.14413000 | 1.38880000  |
| C | -7.49214200 | -3.12525200 | -0.24767900 |
| H | -7.32087400 | -4.16781800 | 0.03112100  |
| H | -8.27666900 | -2.69150100 | 0.37223800  |
| H | -7.76902700 | -3.07328400 | -1.30331100 |
| C | -4.56708500 | 0.20384000  | 2.78333500  |
| H | -4.86038900 | 1.25293300  | 2.80551400  |
| H | -5.32559000 | -0.41064400 | 3.27447200  |
| H | -3.60773700 | 0.06171900  | 3.28485000  |
| C | -2.23609400 | 0.05272400  | -2.95292700 |
| H | -2.33567500 | -0.92224800 | -3.44112200 |
| H | -2.88675100 | 0.76018500  | -3.47793700 |
| H | -1.20061500 | 0.38013600  | -3.08362200 |

|    |            |             |             |
|----|------------|-------------|-------------|
| Ni | 0.76183800 | 0.50718300  | -0.13235000 |
| P  | 3.04751400 | -0.12640300 | -0.41498700 |
| C  | 3.40232600 | -1.62307000 | -1.41873500 |
| C  | 4.27650800 | -2.64308100 | -1.02212200 |
| C  | 2.75127800 | -1.72648900 | -2.65767900 |
| C  | 4.48622200 | -3.75133300 | -1.84534400 |
| H  | 4.78490200 | -2.58272500 | -0.06635200 |
| C  | 2.97036600 | -2.82710800 | -3.48491600 |
| H  | 2.05441700 | -0.95327500 | -2.96751600 |
| C  | 3.83406900 | -3.84718200 | -3.07613900 |
| H  | 5.15906500 | -4.54043200 | -1.52205000 |
| H  | 2.45686400 | -2.89593000 | -4.43949100 |
| C  | 3.73064100 | -0.49228400 | 1.24873600  |
| C  | 3.26736400 | -1.62434400 | 1.93954300  |
| C  | 4.58492100 | 0.40463500  | 1.90631800  |
| C  | 3.66309000 | -1.85859700 | 3.25533600  |
| H  | 2.59961300 | -2.32132400 | 1.44938900  |
| C  | 4.97038200 | 0.17184900  | 3.22869000  |
| H  | 4.95193100 | 1.28464500  | 1.38968800  |
| C  | 4.51276600 | -0.95937600 | 3.90614200  |
| H  | 3.29922200 | -2.74170700 | 3.77185400  |
| H  | 5.63190600 | 0.87557000  | 3.72587700  |
| C  | 4.27096300 | 1.07354000  | -1.09085200 |
| C  | 3.89029900 | 2.40583400  | -1.29535500 |
| C  | 5.59332400 | 0.68971800  | -1.36682100 |
| C  | 4.81789300 | 3.34378000  | -1.75573400 |
| H  | 2.86550200 | 2.69673200  | -1.10882900 |
| C  | 6.51754300 | 1.62599600  | -1.82731500 |
| H  | 5.90087900 | -0.34074900 | -1.22001200 |
| C  | 6.13203000 | 2.95647100  | -2.01984100 |
| H  | 4.51124800 | 4.37458100  | -1.90983500 |
| H  | 7.53834100 | 1.31902700  | -2.03647200 |
| H  | 4.81448600 | -1.13954800 | 4.93384900  |
| H  | 6.85367500 | 3.68472400  | -2.37859200 |
| H  | 3.99638900 | -4.71202500 | -3.71271100 |
| H  | 0.65849200 | 1.16126400  | -2.81190700 |
| H  | 0.17935600 | 2.46526800  | -2.15497800 |

**I-TS3**

|   |            |             |            |
|---|------------|-------------|------------|
| C | 1.15335200 | -0.30721800 | 2.96357000 |
| C | 2.35144900 | -0.79677400 | 3.81457400 |
| H | 1.47563200 | 0.58204800  | 2.40881500 |
| H | 3.24964300 | -0.82568500 | 3.19918100 |
| H | 2.54119700 | -0.03257900 | 4.57675900 |

|   |             |             |             |
|---|-------------|-------------|-------------|
| C | 2.58635400  | -2.74021200 | 1.45258900  |
| H | 3.22624000  | -1.86926100 | 1.57123700  |
| H | 2.88993900  | -3.22204400 | 0.51792600  |
| C | 2.82036300  | -3.74505400 | 2.60514400  |
| H | 2.32271500  | -4.68785600 | 2.34311300  |
| H | 3.89303500  | -3.98721400 | 2.64664400  |
| C | 1.13895900  | -2.33772900 | 1.36008500  |
| H | 0.48866500  | -3.05101600 | 0.85869600  |
| C | 0.53330700  | -1.31502100 | 2.02075300  |
| H | -0.55083300 | -1.27844900 | 1.95736100  |
| C | 2.33785200  | -3.34658500 | 3.98114600  |
| H | 2.13154900  | -4.19394000 | 4.63563500  |
| C | 2.12918700  | -2.12597900 | 4.49265200  |
| H | 1.74585700  | -2.07693700 | 5.51192300  |
| H | 0.35923700  | 0.03434600  | 3.63762100  |
| C | -1.18803700 | 3.02517600  | 1.02952100  |
| C | -2.03949200 | 4.07358300  | 0.65457000  |
| C | 0.05199800  | 3.36326300  | 1.59802900  |
| C | -1.65827400 | 5.40780700  | 0.82788000  |
| H | -3.00682600 | 3.86125000  | 0.21716100  |
| C | 0.43463400  | 4.69110300  | 1.77898800  |
| H | 0.72994400  | 2.56797300  | 1.89322100  |
| C | -0.42016700 | 5.72461500  | 1.38708200  |
| H | -2.33525800 | 6.20015200  | 0.52037800  |
| H | 1.40172700  | 4.91771600  | 2.21906800  |
| H | -0.12472500 | 6.76174400  | 1.51655000  |
| C | -1.51115500 | 1.55042700  | 0.87372900  |
| C | -2.54309300 | 1.08613300  | -0.18393800 |
| C | -3.91498400 | -0.89428600 | 0.40647200  |
| C | -4.87314900 | 0.24070000  | -0.01571000 |
| C | -3.99843600 | 1.49862000  | 0.20082300  |
| H | -1.82577300 | 1.15514100  | 1.84975000  |
| H | -0.56902100 | 1.03127000  | 0.64509400  |
| H | -4.23813200 | -1.87671700 | 0.06403300  |
| H | -3.88868700 | -0.91495300 | 1.50271000  |
| H | -4.05166000 | 1.77531800  | 1.25592700  |
| H | -4.37650400 | 2.33157100  | -0.39284900 |
| C | -5.29362700 | 0.12902800  | -1.48812800 |
| O | -5.43743500 | 1.07428200  | -2.23664100 |
| O | -5.49529600 | -1.14363800 | -1.85437100 |
| C | -6.16386600 | 0.27079400  | 0.79243400  |
| O | -7.28090900 | 0.24417600  | 0.31297000  |
| O | -5.92516600 | 0.33364700  | 2.11322800  |
| C | -5.92177600 | -1.34312000 | -3.21504700 |

|    |             |             |             |
|----|-------------|-------------|-------------|
| H  | -5.18763000 | -0.93028200 | -3.91113800 |
| H  | -5.99953300 | -2.42254500 | -3.34368700 |
| H  | -6.89150000 | -0.86863400 | -3.38517000 |
| C  | -7.09298600 | 0.36446000  | 2.95782000  |
| H  | -6.71550300 | 0.42506000  | 3.97842900  |
| H  | -7.70992000 | 1.23652300  | 2.72817900  |
| H  | -7.68503400 | -0.54422800 | 2.82464000  |
| C  | -2.17081500 | 1.61003500  | -1.58132900 |
| H  | -2.85145300 | 1.21768900  | -2.33996000 |
| H  | -2.21454400 | 2.70104900  | -1.62297700 |
| H  | -1.15813300 | 1.30823200  | -1.84403500 |
| C  | -1.57707000 | -1.25955600 | -0.60098000 |
| C  | -2.57266000 | -0.46204400 | -0.15558600 |
| C  | -1.66486900 | -2.73316300 | -0.50923800 |
| C  | -1.17570500 | -3.52524000 | -1.57141400 |
| C  | -2.12341800 | -3.41233500 | 0.63976700  |
| C  | -1.17134700 | -4.91705600 | -1.49982700 |
| H  | -0.78595300 | -3.02528400 | -2.45283300 |
| C  | -2.10531500 | -4.80545100 | 0.71913900  |
| H  | -2.46653000 | -2.83750600 | 1.49335800  |
| C  | -1.63478500 | -5.56867700 | -0.35192200 |
| H  | -0.79766300 | -5.49753500 | -2.33972300 |
| H  | -2.45780600 | -5.29568700 | 1.62313100  |
| H  | -1.62291300 | -6.65324000 | -0.29174900 |
| Ni | 0.67415600  | -0.74265800 | -0.30402900 |
| H  | -0.69362100 | -0.85549300 | -1.69313000 |
| O  | 0.24840500  | -0.74498600 | -2.39117100 |
| H  | 0.28515500  | 0.15236200  | -2.75161300 |
| P  | 2.73140000  | 0.30668700  | -0.66387000 |
| C  | 3.87363000  | -0.83294600 | -1.53703000 |
| C  | 3.32063400  | -2.00179300 | -2.08349900 |
| C  | 5.24628200  | -0.58526700 | -1.69428700 |
| C  | 4.12884900  | -2.91081900 | -2.76770800 |
| H  | 2.25522100  | -2.17966600 | -1.98042800 |
| C  | 6.05229000  | -1.49820600 | -2.37584100 |
| H  | 5.68774800  | 0.31460300  | -1.27925300 |
| C  | 5.49581200  | -2.66274100 | -2.91118200 |
| H  | 3.69065100  | -3.81256200 | -3.18574700 |
| H  | 7.11394000  | -1.29865700 | -2.48889800 |
| C  | 3.77626200  | 1.09712600  | 0.63497900  |
| C  | 4.74531500  | 0.36101900  | 1.33584200  |
| C  | 3.53734400  | 2.42740200  | 1.01547000  |
| C  | 5.45226200  | 0.93964400  | 2.39135100  |
| H  | 4.96175200  | -0.66260900 | 1.05194900  |

|   |            |             |             |
|---|------------|-------------|-------------|
| C | 4.24046000 | 3.00103700  | 2.07515200  |
| H | 2.80358900 | 3.02185700  | 0.48401000  |
| C | 5.19866100 | 2.25913900  | 2.76942000  |
| H | 6.20084300 | 0.35481200  | 2.91784400  |
| H | 4.04411600 | 4.03306200  | 2.35133200  |
| C | 2.46159500 | 1.68793800  | -1.85079700 |
| C | 1.34726900 | 2.51189700  | -1.62982300 |
| C | 3.29807400 | 1.95471600  | -2.94326900 |
| C | 1.08772600 | 3.60114000  | -2.46159600 |
| H | 0.68328500 | 2.30435300  | -0.80050400 |
| C | 3.02714200 | 3.03403600  | -3.78691200 |
| H | 4.15574500 | 1.32181800  | -3.14298000 |
| C | 1.92799600 | 3.86249700  | -3.54556000 |
| H | 0.22796300 | 4.23399200  | -2.26344200 |
| H | 3.67793100 | 3.22877700  | -4.63455300 |
| H | 5.74672600 | 2.70776100  | 3.59256100  |
| H | 1.72487600 | 4.70319100  | -4.20245600 |
| H | 6.12588300 | -3.37318300 | -3.43852200 |

### 3

|   |             |             |             |
|---|-------------|-------------|-------------|
| H | 2.19836700  | 0.41829500  | 1.54780600  |
| C | 0.28391400  | -2.31097900 | 0.22121400  |
| C | 1.51861000  | 0.85155400  | 0.81803900  |
| C | 0.37281200  | 0.19225200  | 0.57907500  |
| C | -0.00216100 | -1.13540200 | 1.22238600  |
| C | -0.76855000 | 0.64140700  | -0.30153900 |
| C | -2.03326200 | -0.10129200 | 0.22769300  |
| C | -1.53107200 | -0.99144400 | 1.39682300  |
| H | -0.30037800 | -2.14643300 | -0.68812700 |
| H | -0.09770300 | -3.22717000 | 0.68612300  |
| H | -0.89526200 | 1.72645900  | -0.28298700 |
| H | -0.61946700 | 0.35975300  | -1.34908500 |
| H | -2.04304800 | -1.95598300 | 1.43433500  |
| H | -1.74865000 | -0.46537500 | 2.32930400  |
| C | -3.06367600 | 0.92501600  | 0.70504600  |
| O | -3.33140900 | 1.18456500  | 1.85814800  |
| O | -3.61197900 | 1.55089800  | -0.35117100 |
| C | -2.69402700 | -0.94104200 | -0.86882800 |
| O | -2.25962000 | -1.13114100 | -1.98615400 |
| O | -3.83953900 | -1.47372700 | -0.41374800 |
| C | -4.57826400 | 2.57792200  | -0.04885600 |
| H | -4.11460900 | 3.38055100  | 0.52934300  |
| H | -4.91710200 | 2.95373400  | -1.01389300 |
| H | -5.41728900 | 2.16022600  | 0.51226200  |



|   |             |             |             |
|---|-------------|-------------|-------------|
| C | -4.57566200 | -2.28785600 | -1.34926200 |
| H | -4.85201000 | -1.70277200 | -2.22935800 |
| H | -3.98070000 | -3.15115200 | -1.65592900 |
| H | -5.46759200 | -2.61332600 | -0.81500000 |
| C | 1.98648400  | 2.12177600  | 0.24809700  |
| C | 2.92369600  | 2.87701900  | 0.98077200  |
| C | 1.57766800  | 2.61946700  | -1.00436400 |
| C | 3.40473700  | 4.09341600  | 0.50380600  |
| H | 3.26777200  | 2.49900500  | 1.93999600  |
| C | 2.06168000  | 3.83688200  | -1.48283700 |
| H | 0.90391600  | 2.04148700  | -1.62435300 |
| C | 2.97053700  | 4.58340600  | -0.73090500 |
| H | 4.12178600  | 4.65824700  | 1.09268400  |
| H | 1.73383700  | 4.19700000  | -2.45394400 |
| H | 3.34573800  | 5.53039300  | -1.10735500 |
| C | 0.67485300  | -1.40731600 | 2.56610300  |
| H | 0.48814600  | -0.58726000 | 3.26615800  |
| H | 0.28108700  | -2.32881000 | 3.00851200  |
| H | 1.75601900  | -1.52827800 | 2.46247000  |
| C | 1.73342600  | -2.49140100 | -0.15143300 |
| C | 2.56353600  | -3.36429000 | 0.56529100  |
| C | 2.29211100  | -1.76594100 | -1.21368400 |
| C | 3.91445800  | -3.50075700 | 0.23998700  |
| H | 2.14499400  | -3.94278800 | 1.38436000  |
| C | 3.64109400  | -1.89821500 | -1.54325900 |
| H | 1.66037400  | -1.09507900 | -1.78785600 |
| C | 4.45875300  | -2.76498300 | -0.81430100 |
| H | 4.53972800  | -4.18428700 | 0.80739900  |
| H | 4.05318600  | -1.32610100 | -2.36971000 |
| H | 5.50907700  | -2.87029200 | -1.07012700 |

#### I-IM5

|   |            |             |             |
|---|------------|-------------|-------------|
| C | 0.98075300 | -0.90098900 | 2.58364300  |
| C | 2.15544400 | -1.48570700 | 3.39677900  |
| H | 1.24385000 | 0.11726500  | 2.27506800  |
| H | 3.07320600 | -1.43845700 | 2.81206400  |
| H | 2.31619600 | -0.82344600 | 4.25448100  |
| C | 2.57346500 | -3.17023300 | 0.86405500  |
| H | 3.24525400 | -2.35881900 | 1.14011300  |
| H | 2.93918900 | -3.55684200 | -0.09358200 |
| C | 2.65374400 | -4.31671100 | 1.89394800  |
| H | 2.10790200 | -5.18006700 | 1.49043500  |
| H | 3.70073500 | -4.64764000 | 1.96911100  |
| C | 1.16267600 | -2.67050500 | 0.67060200  |

|   |             |             |             |
|---|-------------|-------------|-------------|
| H | 0.53830400  | -3.29620500 | 0.03180500  |
| C | 0.50604900  | -1.70174400 | 1.39150700  |
| H | -0.56372400 | -1.62793300 | 1.20542900  |
| C | 2.11559200  | -4.04766200 | 3.27801400  |
| H | 1.87009800  | -4.95409800 | 3.83293300  |
| C | 1.90161700  | -2.88393000 | 3.90609700  |
| H | 1.47418500  | -2.94039000 | 4.90753400  |
| H | 0.11766800  | -0.79036100 | 3.25302200  |
| C | -1.16134800 | 2.87033600  | 0.66093800  |
| C | -1.88345300 | 3.97275400  | 0.18883300  |
| C | -0.00293800 | 3.12366400  | 1.41587700  |
| C | -1.45753700 | 5.27936400  | 0.45243400  |
| H | -2.78425700 | 3.82951200  | -0.39373700 |
| C | 0.42647200  | 4.42105800  | 1.68044900  |
| H | 0.56924600  | 2.28149300  | 1.79526800  |
| C | -0.30192700 | 5.51174400  | 1.19536700  |
| H | -2.03676300 | 6.11518100  | 0.06936500  |
| H | 1.33234000  | 4.58320000  | 2.25787000  |
| H | 0.02985000  | 6.52671800  | 1.39412500  |
| C | -1.52728000 | 1.41501000  | 0.42511600  |
| C | -2.70572900 | 1.04954000  | -0.51548000 |
| C | -4.13082000 | -0.73818500 | 0.44778000  |
| C | -5.04952600 | 0.45645200  | 0.09834300  |
| C | -4.05612600 | 1.64148200  | 0.00476400  |
| H | -1.72668600 | 0.95852000  | 1.40401900  |
| H | -0.63253400 | 0.90423000  | 0.04424800  |
| H | -4.60449100 | -1.69855500 | 0.24737500  |
| H | -3.89398600 | -0.69435600 | 1.51713500  |
| H | -3.92726500 | 2.06556500  | 1.00294300  |
| H | -4.45586400 | 2.41801600  | -0.64773600 |
| C | -5.74448600 | 0.22905200  | -1.25171200 |
| O | -5.76563400 | 1.02097500  | -2.17096400 |
| O | -6.33562500 | -0.97367500 | -1.29439100 |
| C | -6.14655000 | 0.73996400  | 1.11651300  |
| O | -7.28311100 | 1.06031200  | 0.82847100  |
| O | -5.69671000 | 0.64039100  | 2.37722300  |
| C | -7.03775200 | -1.28250600 | -2.51378700 |
| H | -6.34918800 | -1.27558700 | -3.36216000 |
| H | -7.45156500 | -2.28055500 | -2.37021800 |
| H | -7.83839900 | -0.55959500 | -2.68794300 |
| C | -6.65320000 | 0.94519000  | 3.41247600  |
| H | -6.11142800 | 0.83720800  | 4.35201700  |
| H | -7.02555300 | 1.96641000  | 3.30308300  |
| H | -7.49121800 | 0.24495000  | 3.37445000  |

|    |             |             |             |
|----|-------------|-------------|-------------|
| C  | -2.39820700 | 1.45924400  | -1.96703400 |
| H  | -3.22532300 | 1.18088200  | -2.62482800 |
| H  | -2.24960700 | 2.53836900  | -2.05205700 |
| H  | -1.48770800 | 0.96622100  | -2.31906500 |
| C  | -2.09813600 | -1.36214100 | -0.98679400 |
| C  | -2.90862300 | -0.47167800 | -0.39080000 |
| C  | -2.08045300 | -2.82729600 | -0.89044300 |
| C  | -1.39789500 | -3.53594600 | -1.90113500 |
| C  | -2.61739100 | -3.56372600 | 0.18297600  |
| C  | -1.28851200 | -4.92396500 | -1.86189300 |
| H  | -0.93315400 | -2.97011300 | -2.70331700 |
| C  | -2.50421000 | -4.95366300 | 0.22303200  |
| H  | -3.09426500 | -3.05052800 | 1.00931900  |
| C  | -1.84630300 | -5.64184400 | -0.79946300 |
| H  | -0.76118100 | -5.44599900 | -2.65564100 |
| H  | -2.92137300 | -5.49999100 | 1.06446900  |
| H  | -1.75839000 | -6.72377800 | -0.76264700 |
| Ni | 1.07080600  | -0.96797900 | -0.61211100 |
| H  | -1.31903100 | -0.96841500 | -1.63576100 |
| O  | 0.56589500  | -0.58429200 | -2.39448400 |
| H  | 1.32078400  | -0.41499300 | -2.97167400 |
| P  | 2.94857300  | 0.40797500  | -0.47365200 |
| C  | 4.13233000  | -0.12950200 | -1.77755700 |
| C  | 4.00591200  | -1.42184200 | -2.30653700 |
| C  | 5.15794300  | 0.70529900  | -2.24603700 |
| C  | 4.89519100  | -1.87687300 | -3.28320000 |
| H  | 3.20710700  | -2.06631200 | -1.95217700 |
| C  | 6.04286200  | 0.25163100  | -3.22310300 |
| H  | 5.26078800  | 1.71089900  | -1.85136700 |
| C  | 5.91380700  | -1.04056800 | -3.74225700 |
| H  | 4.78838200  | -2.88014500 | -3.68550100 |
| H  | 6.83253500  | 0.90586000  | -3.58132700 |
| C  | 4.01597500  | 0.52704300  | 1.01635200  |
| C  | 5.13862300  | -0.30163300 | 1.16260200  |
| C  | 3.64456200  | 1.35917700  | 2.08546600  |
| C  | 5.87229200  | -0.29763500 | 2.35084300  |
| H  | 5.44223600  | -0.95071700 | 0.34806100  |
| C  | 4.38459900  | 1.36894000  | 3.26722300  |
| H  | 2.78006800  | 2.00703600  | 1.99056800  |
| C  | 5.49894600  | 0.53717100  | 3.40546900  |
| H  | 6.73865000  | -0.94544900 | 2.44800100  |
| H  | 4.08774400  | 2.02339300  | 4.08160700  |
| C  | 2.58980800  | 2.15659400  | -0.91411300 |
| C  | 1.44705500  | 2.39856600  | -1.69285600 |

|   |            |             |             |
|---|------------|-------------|-------------|
| C | 3.39833600 | 3.23585900  | -0.52520200 |
| C | 1.11365400 | 3.70198400  | -2.06252100 |
| H | 0.83619100 | 1.55299900  | -2.00352000 |
| C | 3.05808900 | 4.53710500  | -0.89590500 |
| H | 4.28535800 | 3.06628600  | 0.07534000  |
| C | 1.91163200 | 4.77349600  | -1.65873100 |
| H | 0.21974200 | 3.88053700  | -2.65247800 |
| H | 3.68602600 | 5.36667000  | -0.58340700 |
| H | 6.07140000 | 0.54059700  | 4.32818400  |
| H | 1.64072600 | 5.78879500  | -1.93302500 |
| H | 6.60335800 | -1.39077800 | -4.50485200 |

**Ni-OH**

|    |             |             |             |
|----|-------------|-------------|-------------|
| C  | -3.72723500 | -2.06572300 | 0.33764600  |
| C  | -4.64296100 | -1.44688900 | -0.73496800 |
| H  | -3.26855500 | -2.97499900 | -0.06907300 |
| H  | -4.04889600 | -1.12609100 | -1.59273500 |
| H  | -5.29335500 | -2.24751700 | -1.10435300 |
| C  | -2.68965600 | 0.94099200  | -0.57585900 |
| H  | -2.80351700 | 0.35000800  | -1.48586000 |
| H  | -1.89691600 | 1.66366100  | -0.78394400 |
| C  | -3.97590300 | 1.73543600  | -0.28646400 |
| H  | -3.79038000 | 2.39248600  | 0.57512500  |
| H  | -4.15978900 | 2.41933000  | -1.12890200 |
| C  | -2.23758400 | 0.08419300  | 0.58588100  |
| H  | -1.64728600 | 0.61388200  | 1.33109100  |
| C  | -2.64641100 | -1.18266700 | 0.93193600  |
| H  | -2.28144600 | -1.54270300 | 1.89474700  |
| C  | -5.23638800 | 0.95832300  | -0.01110800 |
| H  | -6.03740200 | 1.57220000  | 0.40366400  |
| C  | -5.52010500 | -0.33687000 | -0.20142400 |
| H  | -6.51690100 | -0.65940400 | 0.10104000  |
| H  | -4.35545900 | -2.39738400 | 1.17637100  |
| Ni | -0.87537600 | -1.41629500 | -0.28555200 |
| P  | 0.95531500  | -0.05204700 | -0.03096100 |
| C  | 2.34244000  | -0.47320300 | -1.15995000 |
| C  | 3.46468900  | 0.35494900  | -1.32501700 |
| C  | 2.27302100  | -1.69220200 | -1.85199800 |
| C  | 4.51041600  | -0.03911800 | -2.15817500 |
| H  | 3.51640000  | 1.31071000  | -0.81380700 |
| C  | 3.32714100  | -2.08255300 | -2.68283600 |
| H  | 1.38319400  | -2.31409700 | -1.74798400 |
| C  | 4.44540700  | -1.26167500 | -2.83435900 |
| H  | 5.37491900  | 0.60687300  | -2.28195400 |

|   |             |             |             |
|---|-------------|-------------|-------------|
| H | 3.26912200  | -3.02669000 | -3.21732400 |
| C | 1.67211600  | -0.19718000 | 1.65560700  |
| C | 2.72815600  | 0.60951200  | 2.10812400  |
| C | 1.14248100  | -1.17301900 | 2.51198100  |
| C | 3.24281000  | 0.43915300  | 3.39221500  |
| H | 3.14218600  | 1.37607000  | 1.46199300  |
| C | 1.66049900  | -1.34482100 | 3.79789500  |
| H | 0.32319500  | -1.79679200 | 2.16417500  |
| C | 2.71102300  | -0.53882300 | 4.23873000  |
| H | 4.05880500  | 1.06950900  | 3.73353400  |
| H | 1.24239400  | -2.10388200 | 4.45259300  |
| C | 0.72225800  | 1.75063100  | -0.26259500 |
| C | 0.72345000  | 2.28885200  | -1.55987900 |
| C | 0.35363800  | 2.57252500  | 0.81343700  |
| C | 0.37108500  | 3.62135300  | -1.77288400 |
| H | 0.99765600  | 1.66462300  | -2.40464000 |
| C | -0.00504300 | 3.90410900  | 0.59617100  |
| H | 0.34573800  | 2.17495600  | 1.82276000  |
| C | 0.00185300  | 4.43232700  | -0.69612900 |
| H | 0.38130600  | 4.02537100  | -2.78098800 |
| H | -0.28714300 | 4.52798500  | 1.43933200  |
| H | 3.11454500  | -0.66841600 | 5.23872100  |
| H | -0.27741400 | 5.46827300  | -0.86379400 |
| H | 5.26220900  | -1.56668800 | -3.48237700 |
| O | -0.66256200 | -2.97989400 | -1.25481800 |
| H | -0.33308900 | -3.68081800 | -0.67486000 |

#### I-TS4

|   |            |            |             |
|---|------------|------------|-------------|
| C | 3.02759700 | 1.18824400 | -2.03553000 |
| C | 4.07336800 | 1.72066900 | -1.02939900 |
| H | 3.13692600 | 0.09915500 | -2.09554000 |
| H | 3.96902300 | 1.19499700 | -0.08090300 |
| H | 5.06094400 | 1.44523100 | -1.41748200 |
| C | 1.61155300 | 2.01679100 | 0.75610400  |
| H | 2.32416300 | 1.20408800 | 0.88411900  |
| H | 0.83279000 | 1.85640300 | 1.50596900  |
| C | 2.26828500 | 3.38313700 | 1.04980800  |
| H | 1.47099200 | 4.13371400 | 1.13152800  |
| H | 2.72658500 | 3.34211500 | 2.04949800  |
| C | 0.98059500 | 1.96440500 | -0.61186300 |
| H | 0.02198900 | 2.47271400 | -0.69694000 |
| C | 1.57939700 | 1.58003100 | -1.78745300 |
| H | 1.00663400 | 1.77127600 | -2.69520700 |
| C | 3.27785400 | 3.89687400 | 0.05127100  |

|    |             |             |             |
|----|-------------|-------------|-------------|
| H  | 3.39468300  | 4.98125000  | 0.05826000  |
| C  | 4.02838700  | 3.21442400  | -0.82365200 |
| H  | 4.67720000  | 3.79696200  | -1.47842800 |
| H  | 3.28223700  | 1.56848700  | -3.03331500 |
| C  | 2.81615600  | -2.10250000 | 0.40829600  |
| C  | 3.80509900  | -1.29572400 | 0.99671700  |
| C  | 3.64766800  | -0.75916800 | 2.27809000  |
| C  | 2.48581800  | -1.02371300 | 3.00615900  |
| C  | 1.49341400  | -1.83463700 | 2.44774800  |
| C  | 1.66258900  | -2.36554200 | 1.16876900  |
| H  | 4.71385600  | -1.08893300 | 0.43981600  |
| H  | 4.42817000  | -0.13535300 | 2.70594600  |
| H  | 2.35547700  | -0.60616400 | 4.00086300  |
| H  | 0.59119900  | -2.05754000 | 3.01039200  |
| H  | 0.87607600  | -2.98652100 | 0.75258700  |
| Ni | 0.51272900  | -0.15400300 | -1.08669900 |
| P  | -1.55814500 | 0.01292700  | -0.09691300 |
| C  | -2.28550800 | -1.59511800 | 0.41010200  |
| C  | -3.34903200 | -1.70199300 | 1.31933300  |
| C  | -1.75679000 | -2.75576200 | -0.17652100 |
| C  | -3.87701400 | -2.95336400 | 1.63638900  |
| H  | -3.75616700 | -0.81134000 | 1.78644900  |
| C  | -2.29186200 | -4.00596300 | 0.14331900  |
| H  | -0.91399900 | -2.66659700 | -0.86094500 |
| C  | -3.34940700 | -4.10726900 | 1.04920700  |
| H  | -4.69773400 | -3.02854900 | 2.34400000  |
| H  | -1.87510900 | -4.90159500 | -0.30918000 |
| C  | -2.79270700 | 0.70338800  | -1.27035200 |
| C  | -4.12594400 | 0.94949800  | -0.90640600 |
| C  | -2.38025600 | 0.97205100  | -2.58253300 |
| C  | -5.02795700 | 1.45279300  | -1.84209200 |
| H  | -4.45689200 | 0.75376100  | 0.10841300  |
| C  | -3.28565100 | 1.47437600  | -3.52060800 |
| H  | -1.34760800 | 0.78241700  | -2.86316900 |
| C  | -4.60943700 | 1.71514600  | -3.15074100 |
| H  | -6.05770800 | 1.64101500  | -1.55217800 |
| H  | -2.95640600 | 1.67841100  | -4.53539400 |
| C  | -1.72431200 | 1.07724500  | 1.38524900  |
| C  | -1.33861500 | 0.58377600  | 2.64220000  |
| C  | -2.05741800 | 2.43449100  | 1.26190400  |
| C  | -1.29313600 | 1.42843800  | 3.75066000  |
| H  | -1.06650900 | -0.45990300 | 2.75243900  |
| C  | -2.00688300 | 3.27911500  | 2.37271100  |
| H  | -2.35855700 | 2.83431000  | 0.29952200  |

|   |             |             |             |
|---|-------------|-------------|-------------|
| C | -1.62327600 | 2.78015100  | 3.61884600  |
| H | -0.99453300 | 1.03162600  | 4.71666000  |
| H | -2.26942500 | 4.32723700  | 2.26211500  |
| H | -5.31504800 | 2.10662700  | -3.87768700 |
| H | -1.58261400 | 3.43857700  | 4.48141800  |
| H | -3.75986300 | -5.08081700 | 1.30151500  |
| O | 0.92617700  | -1.86014900 | -1.76661100 |
| H | 0.76631400  | -1.92470400 | -2.71815500 |
| B | 3.04344000  | -2.73212500 | -1.02487300 |
| O | 4.09139300  | -2.21359600 | -1.75743600 |
| O | 2.52279300  | -3.95073200 | -1.42867500 |
| H | 4.18235300  | -2.70934100 | -2.58303900 |
| H | 1.57077000  | -3.91415000 | -1.26092500 |

**I-IM6**

|   |            |             |             |
|---|------------|-------------|-------------|
| C | 2.93381700 | 0.70458100  | -2.16143500 |
| C | 4.32314500 | 0.84763600  | -1.50923500 |
| H | 2.76066200 | -0.35895600 | -2.37338600 |
| H | 4.36102000 | 0.27040000  | -0.58505200 |
| H | 5.04562400 | 0.37703200  | -2.18547300 |
| C | 2.70104100 | 1.60025300  | 0.98429900  |
| H | 3.27933100 | 0.68090800  | 0.93049100  |
| H | 2.19943600 | 1.57588000  | 1.95734600  |
| C | 3.63261200 | 2.82909400  | 0.97979700  |
| H | 3.02954200 | 3.72522200  | 1.18196800  |
| H | 4.31829400 | 2.74754300  | 1.83701700  |
| C | 1.64639500 | 1.66096200  | -0.09371000 |
| H | 0.77570900 | 2.26452000  | 0.15868800  |
| C | 1.74767700 | 1.29155700  | -1.41553600 |
| H | 0.93868300 | 1.62807300  | -2.06240100 |
| C | 4.43830400 | 3.09414400  | -0.26672600 |
| H | 4.83814700 | 4.10778900  | -0.31664200 |
| C | 4.73261300 | 2.28494700  | -1.29259600 |
| H | 5.32364600 | 2.71820400  | -2.09990200 |
| H | 2.95738300 | 1.19280000  | -3.14432300 |
| C | 1.94953300 | -2.47257500 | 0.31696600  |
| C | 3.34333600 | -2.30002900 | 0.42465500  |
| C | 3.93900300 | -1.80615500 | 1.58804900  |
| C | 3.14833200 | -1.45240300 | 2.68697800  |
| C | 1.76209900 | -1.58971300 | 2.60734700  |
| C | 1.17646200 | -2.09308000 | 1.43776500  |
| H | 3.96489300 | -2.59029400 | -0.41786800 |
| H | 5.01998700 | -1.70106800 | 1.64337400  |
| H | 3.60996300 | -1.06985500 | 3.59325100  |

|    |             |             |             |
|----|-------------|-------------|-------------|
| H  | 1.13580700  | -1.31766800 | 3.45220900  |
| H  | 0.10076500  | -2.25319900 | 1.41277400  |
| Ni | 0.69409000  | -0.33037500 | -0.50594400 |
| P  | -1.50253300 | 0.23316600  | -0.01811500 |
| C  | -2.83134700 | -0.84412300 | -0.66715200 |
| C  | -4.10112200 | -0.34608700 | -1.00050300 |
| C  | -2.56524400 | -2.21580600 | -0.79862400 |
| C  | -5.09731200 | -1.21226100 | -1.45198900 |
| H  | -4.31018300 | 0.71494600  | -0.90834500 |
| C  | -3.56991700 | -3.07615900 | -1.24689500 |
| H  | -1.57946600 | -2.61789200 | -0.58210900 |
| C  | -4.83352000 | -2.57956300 | -1.57310600 |
| H  | -6.07727100 | -0.82055900 | -1.70940000 |
| H  | -3.35529400 | -4.13604000 | -1.35068800 |
| C  | -1.90037100 | 1.88692600  | -0.70555900 |
| C  | -2.23120800 | 2.99034600  | 0.09060100  |
| C  | -1.79046400 | 2.05245600  | -2.09719100 |
| C  | -2.45292100 | 4.23954700  | -0.49636400 |
| H  | -2.31763300 | 2.87755700  | 1.16605300  |
| C  | -2.02018100 | 3.29712100  | -2.67979800 |
| H  | -1.53065200 | 1.20234000  | -2.72239700 |
| C  | -2.34921600 | 4.39566600  | -1.87913100 |
| H  | -2.70949600 | 5.08900600  | 0.13002900  |
| H  | -1.93846400 | 3.41177700  | -3.75673900 |
| C  | -1.86744000 | 0.38304000  | 1.77268800  |
| C  | -3.12618400 | 0.10099200  | 2.32199100  |
| C  | -0.82881000 | 0.80121300  | 2.61886700  |
| C  | -3.34086800 | 0.24186100  | 3.69403500  |
| H  | -3.93609200 | -0.23174800 | 1.68191900  |
| C  | -1.04818700 | 0.95080400  | 3.98828200  |
| H  | 0.15120900  | 0.99935500  | 2.20108300  |
| C  | -2.30529100 | 0.66904300  | 4.52853600  |
| H  | -4.31809600 | 0.01653200  | 4.11103400  |
| H  | -0.23624400 | 1.27698700  | 4.63178800  |
| H  | -2.52236400 | 5.36676700  | -2.33329800 |
| H  | -2.47611700 | 0.77613900  | 5.59566100  |
| H  | -5.60933100 | -3.25244900 | -1.92734100 |
| O  | 0.52758300  | -1.92827800 | -1.74196300 |
| H  | 0.98689200  | -1.80034400 | -2.58116200 |
| B  | 1.23813900  | -3.09491100 | -1.02460700 |
| O  | 2.24710900  | -3.63331500 | -1.92630000 |
| O  | 0.15987000  | -4.02618000 | -0.69837600 |
| H  | 1.83218500  | -4.36186100 | -2.40458300 |
| H  | 0.43519100  | -4.58351500 | 0.03887700  |



**I-TS5**

|    |             |             |             |
|----|-------------|-------------|-------------|
| C  | 2.98838100  | 1.11800600  | -1.99475100 |
| C  | 4.36292600  | 1.41298700  | -1.35372700 |
| H  | 2.95419000  | 0.05673600  | -2.27369500 |
| H  | 4.53398900  | 0.73602400  | -0.51695600 |
| H  | 5.12757200  | 1.16803100  | -2.10000000 |
| C  | 2.69500000  | 1.51940500  | 1.22221500  |
| H  | 3.35290600  | 0.67896300  | 1.01076600  |
| H  | 2.20249500  | 1.28338800  | 2.17217600  |
| C  | 3.50466000  | 2.81782800  | 1.43318400  |
| H  | 2.83032700  | 3.58184500  | 1.84260000  |
| H  | 4.24995200  | 2.64136700  | 2.22343200  |
| C  | 1.63755900  | 1.66590000  | 0.15730000  |
| H  | 0.70076000  | 2.10223400  | 0.49878600  |
| C  | 1.76290600  | 1.48424200  | -1.18421000 |
| H  | 0.89643000  | 1.77013300  | -1.78176400 |
| C  | 4.18722500  | 3.41999000  | 0.22883800  |
| H  | 4.41515500  | 4.48059100  | 0.34130400  |
| C  | 4.54210900  | 2.85073600  | -0.93038500 |
| H  | 5.00354000  | 3.50000400  | -1.67478700 |
| H  | 2.92152400  | 1.67407200  | -2.93913900 |
| C  | 1.90482800  | -1.91741800 | 0.08343200  |
| C  | 3.31121800  | -1.83621400 | 0.15217100  |
| C  | 4.04506500  | -2.31960500 | 1.24025100  |
| C  | 3.38470900  | -2.91545500 | 2.31852600  |
| C  | 1.99299400  | -3.04082200 | 2.28154700  |
| C  | 1.27901000  | -2.56627500 | 1.17576300  |
| H  | 3.85181800  | -1.38700000 | -0.67659100 |
| H  | 5.12968700  | -2.23266500 | 1.24969300  |
| H  | 3.94791300  | -3.29068000 | 3.16914900  |
| H  | 1.46810500  | -3.51636700 | 3.10740900  |
| H  | 0.19797500  | -2.69844400 | 1.16561400  |
| Ni | 0.58893500  | -0.46577700 | -0.52600400 |
| P  | -1.54452600 | 0.20560900  | 0.01809700  |
| C  | -2.89938800 | -0.79993900 | -0.69426100 |
| C  | -4.19231800 | -0.30156800 | -0.91381100 |
| C  | -2.61022500 | -2.13770300 | -1.00500400 |
| C  | -5.18819600 | -1.13697300 | -1.42208000 |
| H  | -4.41810000 | 0.73667700  | -0.69209600 |
| C  | -3.61167400 | -2.97029200 | -1.50681800 |
| H  | -1.60082400 | -2.51882000 | -0.88084300 |
| C  | -4.90020200 | -2.47283700 | -1.71500800 |
| H  | -6.18738400 | -0.74532700 | -1.59014100 |

|   |             |             |             |
|---|-------------|-------------|-------------|
| H | -3.37950000 | -4.00357600 | -1.74864300 |
| C | -1.98717200 | 1.93229600  | -0.41589200 |
| C | -2.19541200 | 2.93076000  | 0.54430500  |
| C | -1.99490700 | 2.28096500  | -1.77820500 |
| C | -2.40985500 | 4.25435100  | 0.14961100  |
| H | -2.18972800 | 2.67915600  | 1.59937500  |
| C | -2.22077300 | 3.59933400  | -2.16884800 |
| H | -1.82837700 | 1.51568700  | -2.53190600 |
| C | -2.42376200 | 4.59169000  | -1.20401400 |
| H | -2.56752600 | 5.01993400  | 0.90394500  |
| H | -2.23138000 | 3.85459400  | -3.22458600 |
| C | -1.81194000 | 0.10632500  | 1.83139100  |
| C | -3.08746100 | 0.07140900  | 2.41479900  |
| C | -0.67879900 | 0.06028600  | 2.65678100  |
| C | -3.22296400 | -0.00192200 | 3.80122800  |
| H | -3.97241900 | 0.09425800  | 1.78694100  |
| C | -0.81591800 | -0.01122900 | 4.04389800  |
| H | 0.30822400  | 0.06757900  | 2.20685500  |
| C | -2.08843000 | -0.04071000 | 4.61775400  |
| H | -4.21376800 | -0.03066100 | 4.24522800  |
| H | 0.06955900  | -0.05036500 | 4.67156900  |
| H | -2.59083000 | 5.62085100  | -1.50803200 |
| H | -2.19801900 | -0.10072800 | 5.69664800  |
| H | -5.67620900 | -3.12075300 | -2.11256500 |
| O | 0.29236700  | -1.40140600 | -2.44362600 |
| H | 0.76813200  | -0.83877300 | -3.06976700 |
| B | 1.17621100  | -2.42241300 | -1.95895000 |
| O | 2.40325200  | -2.43013200 | -2.64360500 |
| O | 0.47716800  | -3.58443200 | -1.59437800 |
| H | 3.00083500  | -3.10210800 | -2.29516100 |
| H | 0.98216700  | -4.11369900 | -0.96641100 |

**[Ni]-Ar**

|   |             |            |             |
|---|-------------|------------|-------------|
| C | -0.91097500 | 2.55350400 | -0.56046600 |
| C | -2.18995600 | 2.47507500 | -1.15709400 |
| C | -3.13836900 | 3.49869900 | -1.05115300 |
| C | -2.84408500 | 4.65541500 | -0.32372500 |
| C | -1.59064900 | 4.77515300 | 0.28333600  |
| C | -0.65075800 | 3.74583400 | 0.15307000  |
| H | -4.11096700 | 3.39201300 | -1.52839800 |
| H | -2.46825800 | 1.58064900 | -1.71100800 |
| H | -3.58031900 | 5.44999900 | -0.23023300 |
| H | -1.34786400 | 5.67008700 | 0.85360900  |
| H | 0.31888000  | 3.87615900 | 0.63638100  |

|    |             |             |             |
|----|-------------|-------------|-------------|
| C  | 3.07687600  | 1.53598900  | -2.04548200 |
| C  | 4.15471900  | 0.44714100  | -1.85858900 |
| H  | 2.30242100  | 1.15532000  | -2.72914200 |
| H  | 3.70383800  | -0.46785900 | -1.47204900 |
| H  | 4.53980600  | 0.19572200  | -2.85329500 |
| C  | 2.95005900  | 0.23653300  | 0.96412700  |
| H  | 2.85275100  | -0.56814100 | 0.23740800  |
| H  | 2.38414900  | -0.08389100 | 1.84398100  |
| C  | 4.42428600  | 0.40185600  | 1.38746100  |
| H  | 4.46546900  | 1.11331600  | 2.22360400  |
| H  | 4.77607300  | -0.55256200 | 1.80760000  |
| C  | 2.34397000  | 1.52757200  | 0.45809600  |
| H  | 1.95502300  | 2.17796600  | 1.24167400  |
| C  | 2.42361500  | 2.08481800  | -0.79271100 |
| H  | 2.07295300  | 3.11072800  | -0.88357800 |
| C  | 5.40685800  | 0.87129400  | 0.34387700  |
| H  | 6.33907000  | 1.24772600  | 0.76707000  |
| C  | 5.30860500  | 0.89332100  | -0.99188800 |
| H  | 6.15649700  | 1.30944500  | -1.53621500 |
| H  | 3.52897600  | 2.38652900  | -2.57124800 |
| Ni | 0.43553200  | 1.11184500  | -0.60707800 |
| P  | -0.62692200 | -0.82514300 | -0.03481100 |
| C  | -2.42417900 | -0.95630700 | -0.39084700 |
| C  | -2.81064500 | -1.16317500 | -1.72578800 |
| C  | -3.41025800 | -0.78121500 | 0.58637000  |
| C  | -4.15957900 | -1.19761200 | -2.07280800 |
| H  | -2.05359300 | -1.29589100 | -2.49416100 |
| C  | -4.76240800 | -0.80967100 | 0.23428100  |
| H  | -3.12929300 | -0.62017100 | 1.62124800  |
| C  | -5.14064300 | -1.01654200 | -1.09233400 |
| H  | -4.44598700 | -1.36048500 | -3.10786700 |
| H  | -5.51869400 | -0.67204700 | 1.00177100  |
| H  | -6.19216800 | -1.03681900 | -1.36320200 |
| C  | -0.50421300 | -0.91448100 | 1.79523700  |
| C  | -0.09785000 | -2.06183600 | 2.48920500  |
| C  | -0.76301200 | 0.26580800  | 2.51572000  |
| C  | 0.04062200  | -2.03212600 | 3.87909100  |
| H  | 0.11950900  | -2.97686400 | 1.94993000  |
| C  | -0.63566800 | 0.28745100  | 3.90382300  |
| H  | -1.05560100 | 1.16594000  | 1.98367400  |
| C  | -0.23111000 | -0.86165500 | 4.58938600  |
| H  | 0.36077900  | -2.92690400 | 4.40528000  |
| H  | -0.84408100 | 1.20377200  | 4.44859100  |
| H  | -0.12317700 | -0.84214400 | 5.66989100  |

|   |             |             |             |
|---|-------------|-------------|-------------|
| C | 0.00771600  | -2.43176900 | -0.64764600 |
| C | 1.22206000  | -2.43708900 | -1.34661500 |
| C | -0.67993300 | -3.64160800 | -0.45969700 |
| C | 1.75658300  | -3.63170100 | -1.83313300 |
| H | 1.74082000  | -1.49929100 | -1.51946100 |
| C | -0.14681400 | -4.83453500 | -0.94676900 |
| H | -1.63229300 | -3.64779600 | 0.06126000  |
| C | 1.07414200  | -4.83206300 | -1.62890400 |
| H | 2.69891000  | -3.62221100 | -2.37288800 |
| H | -0.68389400 | -5.76642200 | -0.79579300 |
| H | 1.48516600  | -5.76284400 | -2.00866600 |

**I-TS2'**

|   |             |             |             |
|---|-------------|-------------|-------------|
| C | -1.17304900 | 3.48831200  | -2.37708400 |
| C | 0.20806700  | 3.61922700  | -1.71131000 |
| H | -1.20181700 | 2.55021400  | -2.94844400 |
| H | 0.36260100  | 2.78094900  | -1.03101400 |
| H | 0.96434000  | 3.50507300  | -2.49568500 |
| C | -1.40249400 | 3.30595000  | 0.88857000  |
| H | -0.65662600 | 2.56736400  | 0.58702900  |
| H | -1.85402700 | 2.90919200  | 1.80427500  |
| C | -0.71776900 | 4.63302800  | 1.26290000  |
| H | -1.48256500 | 5.32067300  | 1.65107000  |
| H | -0.03725900 | 4.45159500  | 2.10636200  |
| C | -2.48907100 | 3.45899200  | -0.15186000 |
| H | -3.49739800 | 3.54510400  | 0.25307200  |
| C | -2.38496100 | 3.53450700  | -1.48551900 |
| H | -3.31986400 | 3.63941800  | -2.03636000 |
| C | 0.04274300  | 5.35807700  | 0.18469600  |
| H | 0.31383100  | 6.37802400  | 0.46234600  |
| C | 0.43243900  | 4.95028900  | -1.03075000 |
| H | 0.96399300  | 5.68357700  | -1.63758800 |
| H | -1.28234500 | 4.28257300  | -3.12922500 |
| C | 0.13811500  | -0.81321100 | 1.61906200  |
| C | -0.62357800 | -0.27517500 | 2.67189800  |
| C | 0.72566800  | -2.07791300 | 1.77767600  |
| C | -0.87426000 | -1.02930800 | 3.81957800  |
| H | -1.03725200 | 0.72468600  | 2.58789900  |
| C | 0.49658300  | -2.81516200 | 2.94272500  |
| H | 1.36797200  | -2.47553400 | 1.00168600  |
| C | -0.31463000 | -2.30248200 | 3.96093900  |
| H | -1.50494600 | -0.61665300 | 4.60254500  |
| H | 0.95741700  | -3.79338400 | 3.05446100  |

|    |             |             |             |
|----|-------------|-------------|-------------|
| H  | -0.49532100 | -2.88235200 | 4.86131000  |
| H  | -0.00168900 | -1.29437700 | -2.48928800 |
| C  | 1.45192000  | 0.44520700  | 0.66043400  |
| C  | 0.49254600  | -1.23383900 | -1.51190600 |
| C  | 1.89615100  | -0.64422000 | -1.61613300 |
| C  | 2.27987500  | 0.11981800  | -0.35604700 |
| C  | 3.07367600  | -1.64734100 | -1.73969400 |
| C  | 4.31887000  | -0.95741900 | -1.07993500 |
| C  | 3.77510400  | 0.34489500  | -0.39051500 |
| H  | 2.82507600  | -2.56019900 | -1.19199100 |
| H  | 3.29937600  | -1.92356700 | -2.77121000 |
| H  | 4.04005700  | 1.21340900  | -1.00126200 |
| H  | 4.20751000  | 0.50141100  | 0.59696100  |
| C  | 4.91005300  | -1.94366000 | -0.08174700 |
| O  | 5.85176500  | -2.67751300 | -0.30959800 |
| O  | 4.20739100  | -1.96208400 | 1.06277400  |
| C  | 5.40870700  | -0.62900900 | -2.09643200 |
| O  | 5.40891200  | -0.94271600 | -3.26845100 |
| O  | 6.38510700  | 0.09209300  | -1.51952200 |
| C  | 4.60069800  | -2.94378500 | 2.03873000  |
| H  | 5.64665100  | -2.80639100 | 2.32285700  |
| H  | 3.94940200  | -2.77936100 | 2.89650400  |
| H  | 4.46107300  | -3.95371100 | 1.64409300  |
| C  | 7.49105100  | 0.44512400  | -2.37136000 |
| H  | 8.17340200  | 1.02026900  | -1.74537700 |
| H  | 7.98675800  | -0.45398900 | -2.74594000 |
| H  | 7.15063500  | 1.05023900  | -3.21552900 |
| Ni | -0.42005800 | -0.08341100 | -0.08382200 |
| C  | 1.92103900  | 1.34225200  | 1.74585800  |
| C  | 2.16314400  | 2.69433600  | 1.44575500  |
| C  | 2.20750500  | 0.89730700  | 3.05076200  |
| C  | 2.65128500  | 3.57609100  | 2.41120900  |
| H  | 1.95738600  | 3.05799500  | 0.44628800  |
| C  | 2.69914000  | 1.77653000  | 4.01495900  |
| H  | 2.06143100  | -0.14622000 | 3.30185700  |
| C  | 2.91667100  | 3.12208300  | 3.70390600  |
| H  | 2.82007400  | 4.61652100  | 2.14776000  |
| H  | 2.91975500  | 1.40747400  | 5.01300900  |
| H  | 3.29439000  | 3.80494700  | 4.45952900  |
| P  | -2.66033900 | -0.74159100 | -0.39003900 |
| C  | -2.72875900 | -2.51086300 | -0.86935400 |
| C  | -3.50973600 | -2.97489100 | -1.93541200 |
| C  | -1.95754900 | -3.42549700 | -0.13357700 |
| C  | -3.51409200 | -4.33207100 | -2.26532700 |

|   |             |             |             |
|---|-------------|-------------|-------------|
| H | -4.11313900 | -2.28071700 | -2.50999800 |
| C | -1.97270600 | -4.78111700 | -0.45878300 |
| H | -1.34746500 | -3.07433000 | 0.69107600  |
| C | -2.74743800 | -5.23708000 | -1.52927800 |
| H | -4.12070700 | -4.68016100 | -3.09640100 |
| H | -1.37444000 | -5.47966100 | 0.11926300  |
| C | -3.58438400 | 0.10631700  | -1.72544400 |
| C | -2.90851900 | 0.33159900  | -2.93597100 |
| C | -4.91106300 | 0.53541600  | -1.59108100 |
| C | -3.55173100 | 0.97255300  | -3.99391900 |
| H | -1.87893900 | 0.00518200  | -3.04575200 |
| C | -5.54768500 | 1.19008200  | -2.64766400 |
| H | -5.44702900 | 0.36272400  | -0.66406700 |
| C | -4.87114500 | 1.41038200  | -3.84944200 |
| H | -3.01886500 | 1.14144900  | -4.92515500 |
| H | -6.57515000 | 1.52302300  | -2.53201700 |
| C | -3.75259000 | -0.64491900 | 1.08147400  |
| C | -3.89453100 | 0.60337500  | 1.70883000  |
| C | -4.36170200 | -1.76765100 | 1.65668400  |
| C | -4.63281800 | 0.72878000  | 2.88357000  |
| H | -3.42855500 | 1.47721500  | 1.26965000  |
| C | -5.09047400 | -1.64298800 | 2.84197400  |
| H | -4.26352000 | -2.74001900 | 1.18771800  |
| C | -5.22673900 | -0.39858000 | 3.45905900  |
| H | -4.73575700 | 1.70201500  | 3.35488700  |
| H | -5.55335600 | -2.52215100 | 3.28094900  |
| H | -5.36915800 | 1.91854700  | -4.66989200 |
| H | -5.79132900 | -0.30600400 | 4.38215000  |
| H | -2.75300900 | -6.29198200 | -1.78767800 |
| H | 0.49824100  | -2.24061000 | -1.08095600 |
| C | 1.93562400  | 0.33843100  | -2.81198600 |
| H | 2.88731600  | 0.87062600  | -2.90357800 |
| H | 1.13861200  | 1.08091400  | -2.71415900 |
| H | 1.77634800  | -0.21458700 | -3.74438700 |

## II-IM0

|    |            |             |             |
|----|------------|-------------|-------------|
| C  | 0.54811600 | 1.65024900  | 0.20871100  |
| C  | 1.62814100 | 0.99305600  | 0.41834600  |
| Ni | 0.22451700 | -0.23606300 | 0.13240300  |
| C  | 1.89619900 | -1.94911400 | -0.08356700 |
| C  | 3.12692300 | -1.55356400 | 0.70785900  |
| H  | 2.87703700 | -1.51806400 | 1.77084000  |
| H  | 3.85823000 | -2.35993400 | 0.58289300  |
| C  | 3.05054100 | 1.01669000  | 0.82462100  |

|   |             |             |             |
|---|-------------|-------------|-------------|
| H | 3.09182100  | 1.05306700  | 1.92119800  |
| H | 3.54790400  | 1.91598000  | 0.45086900  |
| C | 3.85789200  | -0.22501200 | 0.37428500  |
| C | 0.77326700  | -2.39880000 | 0.56453600  |
| H | 0.02438200  | -2.97738400 | 0.03434500  |
| H | 0.71152200  | -2.38976500 | 1.64974600  |
| C | 2.05974800  | -2.19976500 | -1.56706400 |
| H | 2.18651700  | -1.27434000 | -2.13400800 |
| H | 2.94584000  | -2.81959700 | -1.74744100 |
| H | 1.19128200  | -2.72226500 | -1.97174300 |
| C | -0.13941900 | 2.91447000  | 0.04226000  |
| C | 0.14880900  | 3.73909800  | -1.06208200 |
| C | -1.12891900 | 3.33331000  | 0.95109600  |
| C | -0.53199800 | 4.94155800  | -1.24844700 |
| H | 0.90379600  | 3.41966100  | -1.77445900 |
| C | -1.79974800 | 4.54004900  | 0.76676100  |
| H | -1.36909100 | 2.69919500  | 1.79806100  |
| C | -1.50901300 | 5.34843600  | -0.33618300 |
| H | -0.29870500 | 5.56151600  | -2.10990900 |
| H | -2.56346600 | 4.84405700  | 1.47702500  |
| H | -2.04210300 | 6.28279800  | -0.48602100 |
| C | 4.21140000  | -0.10522700 | -1.11068800 |
| O | 3.83202400  | 0.76757200  | -1.86170900 |
| O | 5.02711000  | -1.10940800 | -1.48049100 |
| C | 5.18341400  | -0.20740600 | 1.15109600  |
| O | 5.49736300  | -0.98092500 | 2.03009200  |
| O | 5.94550600  | 0.82561100  | 0.75391900  |
| C | 5.43711600  | -1.11107100 | -2.86176200 |
| H | 5.97888100  | -0.19277000 | -3.10018900 |
| H | 6.08921500  | -1.97696300 | -2.97358100 |
| H | 4.56952200  | -1.20288800 | -3.51955800 |
| C | 7.20437700  | 0.98332200  | 1.43998000  |
| H | 7.82563900  | 0.09459100  | 1.30676700  |
| H | 7.68020800  | 1.85107300  | 0.98380000  |
| H | 7.03817600  | 1.15722800  | 2.50585700  |
| C | -2.62780800 | -1.86615800 | -1.15320200 |
| C | -3.97045500 | -2.27529800 | -1.10905000 |
| C | -1.80195900 | -2.34443800 | -2.17733200 |
| C | -4.46535600 | -3.16735300 | -2.05881300 |
| H | -4.62728700 | -1.89477300 | -0.33281400 |
| C | -2.29951100 | -3.23253200 | -3.13449400 |
| H | -0.77265300 | -2.00673200 | -2.22573700 |
| C | -3.62965100 | -3.64882100 | -3.07248900 |
| H | -5.50392900 | -3.48231600 | -2.01417100 |

|   |             |             |             |
|---|-------------|-------------|-------------|
| H | -1.64914200 | -3.59503100 | -3.92540200 |
| H | -4.01890600 | -4.34069200 | -3.81378100 |
| C | -2.41880200 | -1.26742800 | 1.69040200  |
| C | -2.29089700 | -0.39791900 | 2.78819500  |
| C | -2.75490500 | -2.60769400 | 1.92528800  |
| C | -2.52309200 | -0.85291200 | 4.08486400  |
| H | -2.01147100 | 0.63836500  | 2.62509800  |
| C | -2.97503500 | -3.06465500 | 3.22752900  |
| H | -2.84651600 | -3.29923000 | 1.09514600  |
| C | -2.86574600 | -2.18988900 | 4.30893900  |
| H | -2.43153900 | -0.16502200 | 4.92055400  |
| H | -3.23556500 | -4.10627400 | 3.39251300  |
| H | -3.04150100 | -2.54562800 | 5.31989800  |
| P | -1.93407600 | -0.64170500 | 0.03309600  |
| C | -3.05586900 | 0.78162700  | -0.28780000 |
| C | -2.76201800 | 1.56620600  | -1.41401100 |
| C | -4.17379000 | 1.09970400  | 0.49245300  |
| C | -3.57440900 | 2.64325500  | -1.75895600 |
| H | -1.88226900 | 1.33938700  | -2.00908000 |
| C | -4.98001900 | 2.19026400  | 0.15389900  |
| H | -4.41632100 | 0.50599000  | 1.36723300  |
| C | -4.68412200 | 2.96187600  | -0.97078700 |
| H | -3.32987100 | 3.24624700  | -2.62812500 |
| H | -5.84153600 | 2.43338800  | 0.76959100  |
| H | -5.30985300 | 3.81099200  | -1.22998700 |

## II-TS1

|   |             |             |             |
|---|-------------|-------------|-------------|
| C | -2.87722900 | 0.20166900  | 1.68059500  |
| C | -4.22304000 | 0.53268400  | 1.90267900  |
| C | -1.95133000 | 0.33095700  | 2.72359500  |
| C | -4.62716700 | 1.01548200  | 3.14651300  |
| H | -4.94978700 | 0.40999000  | 1.10568800  |
| C | -2.35982000 | 0.81051700  | 3.96945000  |
| H | -0.91660600 | 0.04861800  | 2.55467300  |
| C | -3.69531600 | 1.15851200  | 4.17933500  |
| H | -5.66843400 | 1.27603400  | 3.31147100  |
| H | -1.63593100 | 0.90881900  | 4.77288300  |
| H | -4.01380000 | 1.53152100  | 5.14829100  |
| C | -2.74913200 | 0.76443900  | -1.20604800 |
| C | -2.49079700 | 0.42033900  | -2.54356500 |
| C | -3.24889800 | 2.03612900  | -0.90696800 |
| C | -2.75195700 | 1.33030400  | -3.56564700 |
| H | -2.08635000 | -0.55947400 | -2.78196900 |
| C | -3.49971800 | 2.94874400  | -1.93404000 |



|    |             |             |             |
|----|-------------|-------------|-------------|
| H  | -3.43092100 | 2.32376000  | 0.12133400  |
| C  | -3.25859400 | 2.59766400  | -3.26231900 |
| H  | -2.55456700 | 1.05305900  | -4.59692800 |
| H  | -3.87753600 | 3.93704700  | -1.68995900 |
| H  | -3.45417900 | 3.30990300  | -4.05845700 |
| C  | 0.54454600  | 0.45548100  | -0.24429100 |
| C  | 1.73585000  | -0.13978800 | -0.33216800 |
| Ni | -0.30024400 | -1.14646300 | 0.11346900  |
| P  | -2.31913500 | -0.46559000 | 0.07250500  |
| C  | 2.01024500  | -1.71443900 | -0.28182600 |
| C  | 3.32589100  | -1.70299400 | 0.52832500  |
| H  | 3.09548500  | -1.62203300 | 1.59286000  |
| H  | 3.89616600  | -2.62281000 | 0.37728200  |
| C  | 3.07430700  | 0.55924200  | -0.44715100 |
| H  | 3.06536500  | 1.51188900  | 0.08724700  |
| H  | 3.32706500  | 0.77735800  | -1.48900300 |
| C  | 4.12763300  | -0.43512000 | 0.12746400  |
| C  | 0.94821700  | -2.66640200 | 0.35177800  |
| H  | 0.90141700  | -3.60535600 | -0.20447600 |
| H  | 1.20326900  | -2.88584400 | 1.39485300  |
| C  | 2.25276900  | -2.14919900 | -1.74437400 |
| H  | 2.90601400  | -1.46427300 | -2.29150000 |
| H  | 2.71323400  | -3.14344600 | -1.76372600 |
| H  | 1.29830100  | -2.20369200 | -2.27753300 |
| C  | 0.20725300  | 1.87263900  | -0.35284200 |
| C  | 0.23112200  | 2.51491400  | -1.60438900 |
| C  | -0.15404000 | 2.62386300  | 0.78001800  |
| C  | -0.09866900 | 3.86441500  | -1.71784800 |
| H  | 0.49769600  | 1.94149900  | -2.48625600 |
| C  | -0.47633600 | 3.97519400  | 0.66500500  |
| H  | -0.17663500 | 2.14132300  | 1.75025800  |
| C  | -0.45293400 | 4.60072700  | -0.58427300 |
| H  | -0.08329100 | 4.34094000  | -2.69386400 |
| H  | -0.74677200 | 4.54044800  | 1.55255200  |
| H  | -0.71203400 | 5.65167100  | -0.67435100 |
| C  | -3.47425900 | -1.86111100 | -0.22217100 |
| C  | -3.23292600 | -3.06081900 | 0.46599000  |
| C  | -4.59473500 | -1.75784300 | -1.05762300 |
| C  | -4.10627300 | -4.13817500 | 0.32602100  |
| H  | -2.35917700 | -3.14544400 | 1.10577800  |
| C  | -5.46241900 | -2.84286200 | -1.20074400 |
| H  | -4.79355300 | -0.83717400 | -1.59483800 |
| C  | -5.22040800 | -4.03252300 | -0.51136500 |
| H  | -3.91279500 | -5.06166700 | 0.86392400  |

|   |             |             |             |
|---|-------------|-------------|-------------|
| H | -6.32743100 | -2.75580600 | -1.85177300 |
| H | -5.89717100 | -4.87429000 | -0.62532300 |
| C | 5.21458100  | -0.75948500 | -0.89883800 |
| O | 5.25225400  | -0.37651300 | -2.04995700 |
| O | 6.14409400  | -1.56017800 | -0.35083700 |
| C | 4.80111500  | 0.20659600  | 1.34172200  |
| O | 4.53891400  | -0.02275900 | 2.50321300  |
| O | 5.70076500  | 1.12388100  | 0.94586700  |
| C | 7.24605600  | -1.92463400 | -1.20533800 |
| H | 7.79288400  | -1.03327700 | -1.52319500 |
| H | 7.88657500  | -2.56612000 | -0.60029300 |
| H | 6.88753500  | -2.46531600 | -2.08446800 |
| C | 6.38059800  | 1.83898000  | 1.99667700  |
| H | 6.93969200  | 1.14678100  | 2.63109000  |
| H | 7.06155100  | 2.52414200  | 1.49200400  |
| H | 5.66526800  | 2.39601200  | 2.60671800  |

## II-IMI

|    |             |             |             |
|----|-------------|-------------|-------------|
| C  | -3.84046300 | -0.55851000 | -1.09797000 |
| C  | -5.13880300 | -0.71068500 | -0.58549600 |
| C  | -3.54213900 | -1.05767200 | -2.37251700 |
| C  | -6.11394100 | -1.37201600 | -1.32984000 |
| H  | -5.38326000 | -0.31309000 | 0.39450900  |
| C  | -4.52146300 | -1.71716800 | -3.11888400 |
| H  | -2.54511600 | -0.92471400 | -2.78009100 |
| C  | -5.80548300 | -1.87847000 | -2.59666500 |
| H  | -7.11490300 | -1.48896900 | -0.92508800 |
| H  | -4.27984500 | -2.10154100 | -4.10538000 |
| H  | -6.56741200 | -2.39246800 | -3.17532300 |
| C  | -2.44756900 | -0.46296300 | 1.46953800  |
| C  | -1.69156000 | 0.17865400  | 2.46545300  |
| C  | -3.01018400 | -1.71575700 | 1.73762500  |
| C  | -1.52258600 | -0.41630600 | 3.71378100  |
| H  | -1.23568100 | 1.14241700  | 2.25948600  |
| C  | -2.83283500 | -2.31213800 | 2.98832400  |
| H  | -3.57471500 | -2.23424800 | 0.97196000  |
| C  | -2.09484100 | -1.66419300 | 3.97879700  |
| H  | -0.94020600 | 0.09069900  | 4.47754500  |
| H  | -3.27037200 | -3.28687800 | 3.18301900  |
| H  | -1.95862900 | -2.13112100 | 4.94982400  |
| C  | 0.71331300  | -0.34370300 | -0.30572800 |
| C  | 1.95477200  | 0.13648600  | -0.09512200 |
| Ni | -0.47193600 | 0.91690600  | -1.03891200 |
| P  | -2.53394200 | 0.33432000  | -0.17241900 |

|   |             |             |             |
|---|-------------|-------------|-------------|
| C | 2.24594700  | 1.52319700  | -0.61025800 |
| C | 3.66903000  | 1.34426300  | -1.19552200 |
| H | 3.60273800  | 0.92988900  | -2.20423100 |
| H | 4.24570000  | 2.27112400  | -1.25168400 |
| C | 3.21672600  | -0.52841900 | 0.39404100  |
| H | 3.24815900  | -1.59544200 | 0.15614900  |
| H | 3.34768000  | -0.43850400 | 1.47688400  |
| C | 4.37194600  | 0.27304900  | -0.30441800 |
| C | 1.11787800  | 1.82430700  | -1.61789700 |
| H | 0.87640900  | 2.89715400  | -1.70294600 |
| H | 1.37390200  | 1.44653800  | -2.61762800 |
| C | 2.24373000  | 2.56043400  | 0.52938000  |
| H | 2.93279100  | 2.28892900  | 1.33522000  |
| H | 2.53555300  | 3.54898000  | 0.15445700  |
| H | 1.23912000  | 2.64220600  | 0.95851200  |
| C | 0.25777300  | -1.70617600 | 0.00375800  |
| C | 0.57205900  | -2.33185600 | 1.22571200  |
| C | -0.52712000 | -2.42085500 | -0.92013000 |
| C | 0.12732500  | -3.62409800 | 1.50317200  |
| H | 1.14615900  | -1.78656500 | 1.96736700  |
| C | -0.97674400 | -3.71010400 | -0.64142100 |
| H | -0.77670000 | -1.94677200 | -1.86302000 |
| C | -0.65098600 | -4.31922500 | 0.57359700  |
| H | 0.37477300  | -4.08375600 | 2.45602900  |
| H | -1.58408400 | -4.23788800 | -1.37176900 |
| H | -1.00522300 | -5.32132600 | 0.79721000  |
| C | -3.31155300 | 1.96774400  | 0.15386500  |
| C | -3.12524500 | 2.96121800  | -0.82166300 |
| C | -4.06407500 | 2.26350400  | 1.29832100  |
| C | -3.68906400 | 4.22696800  | -0.65995700 |
| H | -2.54153900 | 2.73819200  | -1.71345000 |
| C | -4.62356500 | 3.53213000  | 1.46041600  |
| H | -4.20638500 | 1.50851800  | 2.06418800  |
| C | -4.43803100 | 4.51420700  | 0.48401600  |
| H | -3.53974800 | 4.98723100  | -1.42096600 |
| H | -5.20499800 | 3.75376700  | 2.35072700  |
| H | -4.87392700 | 5.50021700  | 0.61481300  |
| C | 5.29105600  | 0.93620900  | 0.72286500  |
| O | 5.12928600  | 0.95792100  | 1.92596600  |
| O | 6.32185700  | 1.53710400  | 0.10311800  |
| C | 5.21405500  | -0.68971500 | -1.14015800 |
| O | 5.17131400  | -0.81259900 | -2.34593100 |
| O | 5.98838800  | -1.44635400 | -0.34054000 |
| C | 7.26253000  | 2.21712200  | 0.95634800  |

|   |            |             |             |
|---|------------|-------------|-------------|
| H | 7.71630300 | 1.51666900  | 1.66162200  |
| H | 8.02008700 | 2.62833900  | 0.28917800  |
| H | 6.76808900 | 3.02014300  | 1.50861800  |
| C | 6.79568000 | -2.44160300 | -0.99895500 |
| H | 7.49221900 | -1.97069000 | -1.69708300 |
| H | 7.34160700 | -2.94893900 | -0.20359700 |
| H | 6.16463000 | -3.15200600 | -1.53861000 |

## II-IM2

|   |             |             |             |
|---|-------------|-------------|-------------|
| C | 0.45526900  | 1.01377900  | -1.10997300 |
| C | 1.23338100  | 0.02766000  | 1.15623900  |
| C | 2.19598900  | 0.78528500  | 0.59956900  |
| C | 1.84206000  | 1.51649000  | -0.66898500 |
| C | 3.67658400  | 0.93513100  | 0.83993400  |
| C | 4.26571300  | 0.94120300  | -0.61969500 |
| C | 3.03611100  | 1.12931200  | -1.58212900 |
| H | 0.52279100  | 0.23758200  | -1.88701000 |
| H | -0.18385100 | 1.82192000  | -1.47753900 |
| H | 3.90411100  | 1.89707000  | 1.31406600  |
| H | 4.12330200  | 0.15926500  | 1.45849000  |
| H | 2.81597700  | 0.17992900  | -2.07908300 |
| H | 3.27048200  | 1.87009500  | -2.34912700 |
| C | 5.29679900  | 2.05676400  | -0.77583800 |
| O | 5.23848200  | 2.98206800  | -1.55855600 |
| O | 6.29054300  | 1.89800000  | 0.11544800  |
| C | 4.95538300  | -0.35848000 | -1.00933100 |
| O | 5.86198200  | -0.43223200 | -1.81546000 |
| O | 4.39595100  | -1.43292000 | -0.42412100 |
| C | 7.33356700  | 2.88981900  | 0.07709000  |
| H | 6.92717600  | 3.88395000  | 0.27978400  |
| H | 8.04010800  | 2.60499900  | 0.85672200  |
| H | 7.82597700  | 2.89081300  | -0.89855300 |
| C | 4.91558300  | -2.71294600 | -0.83380100 |
| H | 4.34648000  | -3.45448800 | -0.27496300 |
| H | 4.77908600  | -2.85626300 | -1.90818500 |
| H | 5.97816400  | -2.78929300 | -0.59121800 |
| C | 1.34698200  | -0.80509200 | 2.36417000  |
| C | 0.30609300  | -0.76643200 | 3.31507500  |
| C | 2.38713000  | -1.73474400 | 2.56812100  |
| C | 0.30188300  | -1.61607200 | 4.42117300  |
| H | -0.50948800 | -0.06309200 | 3.16593900  |
| C | 2.38137500  | -2.58701800 | 3.67209500  |
| H | 3.18392800  | -1.80072000 | 1.83571000  |
| C | 1.33874900  | -2.53546800 | 4.60301000  |

|    |             |             |             |
|----|-------------|-------------|-------------|
| H  | -0.51350700 | -1.56435900 | 5.13802900  |
| H  | 3.18973200  | -3.30179300 | 3.80416100  |
| H  | 1.33416400  | -3.20464800 | 5.45866400  |
| C  | 1.81437300  | 3.04373300  | -0.46178300 |
| H  | 2.76921900  | 3.42970200  | -0.09138100 |
| H  | 1.60063900  | 3.55184600  | -1.40969900 |
| H  | 1.03242400  | 3.31835300  | 0.25218900  |
| C  | 1.23424300  | -2.96602200 | -0.45506700 |
| C  | 1.18402100  | -3.22422200 | -1.97137400 |
| H  | 1.88615800  | -2.10722800 | -0.25996100 |
| H  | 0.73612900  | -2.36809400 | -2.47896100 |
| H  | 2.21874900  | -3.27502300 | -2.32827100 |
| C  | -1.79321700 | -2.49288900 | -1.64277500 |
| H  | -1.12826300 | -1.89899000 | -2.27022300 |
| H  | -2.75524100 | -1.97619900 | -1.66675500 |
| C  | -2.01183400 | -3.88509000 | -2.26292200 |
| H  | -2.75182200 | -4.42566200 | -1.65515600 |
| H  | -2.49309000 | -3.75635600 | -3.24460000 |
| C  | -1.31546200 | -2.53453400 | -0.21021800 |
| H  | -2.10519600 | -2.48579500 | 0.53661600  |
| C  | -0.07047100 | -2.74415500 | 0.26363500  |
| H  | 0.02032900  | -2.80433400 | 1.34469400  |
| C  | -0.81534300 | -4.78361600 | -2.43163300 |
| H  | -1.08335300 | -5.81043900 | -2.68577000 |
| C  | 0.49358800  | -4.52016300 | -2.32915900 |
| H  | 1.16727600  | -5.36307900 | -2.48528800 |
| H  | 1.72861200  | -3.82013000 | 0.02853500  |
| Ni | -0.43578100 | -0.03791000 | 0.23880500  |
| P  | -2.56277700 | 0.71249700  | -0.11798700 |
| C  | -3.65257300 | -0.03014800 | 1.16567300  |
| C  | -4.32852900 | -1.23742600 | 0.91984200  |
| C  | -3.69237200 | 0.51595600  | 2.45771300  |
| C  | -5.02898500 | -1.87818200 | 1.94188100  |
| H  | -4.31447500 | -1.67596800 | -0.07206800 |
| C  | -4.38742100 | -0.13197800 | 3.48043700  |
| H  | -3.18108800 | 1.44903500  | 2.66804200  |
| C  | -5.05723200 | -1.33021600 | 3.22689500  |
| H  | -5.55290000 | -2.80640400 | 1.73267400  |
| H  | -4.40863000 | 0.30579400  | 4.47426900  |
| C  | -3.51657600 | 0.61385000  | -1.68159700 |
| C  | -4.91817400 | 0.57233700  | -1.72948500 |
| C  | -2.79077700 | 0.61619500  | -2.88276200 |
| C  | -5.57927800 | 0.52668600  | -2.95803600 |
| H  | -5.49368700 | 0.57228100  | -0.81022400 |

|   |             |             |             |
|---|-------------|-------------|-------------|
| C | -3.45388500 | 0.57854600  | -4.10917800 |
| H | -1.70654000 | 0.63921700  | -2.85413800 |
| C | -4.84938700 | 0.52925200  | -4.14888600 |
| H | -6.66458700 | 0.49109500  | -2.98361600 |
| H | -2.88123400 | 0.57879500  | -5.03200300 |
| C | -2.60488800 | 2.50820500  | 0.28928300  |
| C | -1.61678600 | 3.00835300  | 1.15144300  |
| C | -3.58948300 | 3.37856600  | -0.19845300 |
| C | -1.62188100 | 4.35118000  | 1.53137500  |
| H | -0.83985200 | 2.33929200  | 1.50887300  |
| C | -3.58644600 | 4.72377400  | 0.17378900  |
| H | -4.35647100 | 3.01180100  | -0.87176200 |
| C | -2.60627700 | 5.21215400  | 1.04120400  |
| H | -0.85174700 | 4.72457700  | 2.20009100  |
| H | -4.35137600 | 5.39031200  | -0.21421800 |
| H | -5.36572900 | 0.49183700  | -5.10362900 |
| H | -2.60697900 | 6.25955200  | 1.32864300  |
| H | -5.59963000 | -1.83210700 | 4.02258100  |

## II-IM3

|   |             |             |             |
|---|-------------|-------------|-------------|
| H | -0.63212100 | -1.12933300 | 2.92277700  |
| C | 0.45678000  | 1.15559600  | -0.63567600 |
| C | 1.32583000  | 0.09269600  | 1.58293400  |
| C | 2.25107000  | 0.85460900  | 0.97330400  |
| C | 1.80305800  | 1.73072800  | -0.16653700 |
| C | 3.75178100  | 0.92641200  | 1.08361200  |
| C | 4.19022100  | 0.97789800  | -0.41702000 |
| C | 2.98051700  | 1.62846100  | -1.18638800 |
| H | 0.63757200  | 0.31537900  | -1.31806100 |
| H | -0.14611100 | 1.90147100  | -1.16636400 |
| H | 4.06569600  | 1.85600800  | 1.57276900  |
| H | 4.21482600  | 0.08893200  | 1.60382300  |
| H | 2.70822500  | 0.99816100  | -2.03334100 |
| H | 3.26685300  | 2.60304700  | -1.58546100 |
| C | 5.49671900  | 1.75017800  | -0.54984100 |
| O | 6.58575200  | 1.24325600  | -0.73889200 |
| O | 5.31467800  | 3.06985300  | -0.37340100 |
| C | 4.48309100  | -0.44008300 | -0.92297900 |
| O | 4.63443300  | -1.42264900 | -0.22545400 |
| O | 4.57120600  | -0.46731000 | -2.26239500 |
| C | 6.50859000  | 3.87571000  | -0.39911600 |
| H | 7.00868700  | 3.79016300  | -1.36697100 |
| H | 6.17503800  | 4.90026400  | -0.23478100 |
| H | 7.19628300  | 3.56827900  | 0.39265000  |

|    |             |             |             |
|----|-------------|-------------|-------------|
| C  | 4.93958000  | -1.73126300 | -2.84450100 |
| H  | 4.92465900  | -1.57375200 | -3.92303500 |
| H  | 5.94237100  | -2.02074900 | -2.51905500 |
| H  | 4.22920000  | -2.51114700 | -2.56351800 |
| C  | 1.65265900  | -0.83331100 | 2.68600000  |
| C  | 1.09789200  | -0.65235800 | 3.97265500  |
| C  | 2.47266500  | -1.96324200 | 2.48534400  |
| C  | 1.33550400  | -1.56770900 | 5.00362100  |
| H  | 0.50228200  | 0.23756000  | 4.16853100  |
| C  | 2.70846900  | -2.87349000 | 3.51384200  |
| H  | 2.93265900  | -2.10925300 | 1.51482000  |
| C  | 2.13267100  | -2.68968300 | 4.77564700  |
| H  | 0.89786700  | -1.39881900 | 5.98391400  |
| H  | 3.34396700  | -3.73587600 | 3.32909700  |
| H  | 2.31213200  | -3.40725600 | 5.57095600  |
| C  | 1.64640000  | 3.19203800  | 0.29648900  |
| H  | 2.59311200  | 3.59577000  | 0.67153500  |
| H  | 1.32045700  | 3.82995100  | -0.53414900 |
| H  | 0.90136100  | 3.26341400  | 1.09420600  |
| C  | 1.58047500  | -2.96196000 | -1.06401200 |
| C  | 0.72957000  | -2.38849500 | -2.21311700 |
| H  | 2.05033300  | -2.12347800 | -0.53485400 |
| H  | -0.00011500 | -1.69085700 | -1.80787000 |
| H  | 1.39442100  | -1.79292200 | -2.85037200 |
| C  | -1.58239700 | -3.22586100 | -0.39266700 |
| H  | -1.34304500 | -2.17084500 | -0.52838000 |
| H  | -2.41274200 | -3.24912700 | 0.32068000  |
| C  | -2.10600700 | -3.84128700 | -1.70894800 |
| H  | -2.53513400 | -4.82714400 | -1.48198900 |
| H  | -2.95020200 | -3.23353900 | -2.06528100 |
| C  | -0.41931400 | -3.96883300 | 0.21844500  |
| H  | -0.68887700 | -4.70615800 | 0.97540000  |
| C  | 0.88449400  | -3.84894900 | -0.06349900 |
| H  | 1.56586500  | -4.47891200 | 0.50888500  |
| C  | -1.12663300 | -4.02948200 | -2.84053000 |
| H  | -1.44998700 | -4.76349800 | -3.58008000 |
| C  | 0.05322000  | -3.43562300 | -3.06058300 |
| H  | 0.60770100  | -3.75193000 | -3.94458500 |
| H  | 2.41452000  | -3.53580500 | -1.48977000 |
| Ni | -0.46315200 | 0.25110600  | 0.81661700  |
| P  | -2.53298600 | 0.77093600  | -0.05063700 |
| C  | -3.92496900 | 0.44686000  | 1.11198300  |
| C  | -4.17501900 | -0.87889000 | 1.51214800  |
| C  | -4.70910400 | 1.47538200  | 1.65364700  |

|   |             |             |             |
|---|-------------|-------------|-------------|
| C | -5.18452900 | -1.16506800 | 2.43138600  |
| H | -3.57524200 | -1.68558200 | 1.10664200  |
| C | -5.71658500 | 1.18540700  | 2.57625500  |
| H | -4.53887000 | 2.50314200  | 1.35441500  |
| C | -5.95797000 | -0.13259600 | 2.96737100  |
| H | -5.36500900 | -2.19448900 | 2.72678300  |
| H | -6.31639100 | 1.99345000  | 2.98485500  |
| C | -3.07968000 | -0.03193600 | -1.61131600 |
| C | -4.39213400 | -0.47988600 | -1.81854300 |
| C | -2.13628500 | -0.18132300 | -2.63978700 |
| C | -4.74868300 | -1.07615400 | -3.03030800 |
| H | -5.13675300 | -0.36611200 | -1.03873900 |
| C | -2.49504400 | -0.77612300 | -3.84833000 |
| H | -1.12139200 | 0.16681600  | -2.49316300 |
| C | -3.80199800 | -1.22828600 | -4.04561700 |
| H | -5.76799200 | -1.42067500 | -3.17874800 |
| H | -1.75088800 | -0.89514600 | -4.62950600 |
| C | -2.69984300 | 2.56275100  | -0.39861000 |
| C | -2.03889100 | 3.45741800  | 0.45643900  |
| C | -3.47661100 | 3.06350300  | -1.45090700 |
| C | -2.15992300 | 4.83344500  | 0.26688400  |
| H | -1.42238900 | 3.06774500  | 1.26065100  |
| C | -3.58954000 | 4.44173400  | -1.64453100 |
| H | -3.99085200 | 2.38067500  | -2.11873100 |
| C | -2.93446300 | 5.32754800  | -0.78627000 |
| H | -1.64216800 | 5.51775800  | 0.93261600  |
| H | -4.19027600 | 4.82194700  | -2.46568200 |
| H | -4.08035700 | -1.69863700 | -4.98402000 |
| H | -3.02298100 | 6.39903200  | -0.94001700 |
| H | -6.74233700 | -0.35451400 | 3.68479700  |
| O | -1.29146600 | -0.97261400 | 2.22126800  |
| H | -2.09144300 | -0.63159600 | 2.65073700  |

## II-TS2

|   |             |            |             |
|---|-------------|------------|-------------|
| H | 0.34820600  | 0.31513200 | -2.50859000 |
| C | 0.23022100  | 2.76235900 | 2.10094700  |
| C | -0.73185300 | 3.62632700 | 2.94124500  |
| H | 0.36911200  | 1.79698200 | 2.60949100  |
| H | -1.67659100 | 3.09933600 | 3.07742700  |
| H | -0.29576900 | 3.72457900 | 3.94233500  |
| C | -2.64395100 | 3.06708200 | 0.60120700  |
| H | -2.81501700 | 2.65156000 | 1.59451100  |
| H | -3.44280100 | 2.66323600 | -0.03022700 |
| C | -2.80440100 | 4.60058000 | 0.62352700  |



|   |             |             |             |
|---|-------------|-------------|-------------|
| H | -2.76282900 | 4.96691200  | -0.41166900 |
| H | -3.81927500 | 4.84719800  | 0.97189200  |
| C | -1.31820300 | 2.61495700  | 0.03822700  |
| H | -1.31957000 | 2.36708800  | -1.02185100 |
| C | -0.14005000 | 2.49729500  | 0.66650700  |
| H | 0.69166200  | 2.14555600  | 0.06168000  |
| C | -1.80584400 | 5.39967200  | 1.42284200  |
| H | -1.79408800 | 6.45942400  | 1.16338100  |
| C | -0.94951800 | 5.01062800  | 2.37648800  |
| H | -0.29921100 | 5.78168400  | 2.79055700  |
| H | 1.22339600  | 3.22998900  | 2.10579300  |
| O | -0.87147500 | 0.54776100  | -2.70099400 |
| H | -1.26571900 | -0.15944900 | -3.23284900 |
| C | 3.11284100  | -2.21126900 | 0.32705500  |
| C | 4.07746300  | -0.99971300 | 0.40925200  |
| C | 3.91788100  | -0.36130500 | -0.99415400 |
| H | 2.81299800  | -2.56875300 | 1.31312700  |
| H | 3.63794700  | -3.02301400 | -0.18131600 |
| H | 4.48239900  | -0.97512700 | -1.70739600 |
| H | 4.30110200  | 0.65540200  | -1.04142100 |
| C | 3.66732500  | -0.00435200 | 1.50137400  |
| O | 3.55888800  | 1.19630100  | 1.35363300  |
| O | 3.45723500  | -0.62686400 | 2.67030400  |
| C | 5.53082700  | -1.36523700 | 0.68994600  |
| O | 6.25207700  | -0.76967200 | 1.46659300  |
| O | 5.94081400  | -2.39844300 | -0.06208300 |
| C | 3.13855100  | 0.22440700  | 3.78672600  |
| H | 2.20620100  | 0.76480900  | 3.60629500  |
| H | 3.02927300  | -0.44171500 | 4.64238300  |
| H | 3.94469100  | 0.94071500  | 3.96283000  |
| C | 7.32459500  | -2.77334600 | 0.08731300  |
| H | 7.47754900  | -3.60841400 | -0.59609400 |
| H | 7.97848100  | -1.93926300 | -0.17833200 |
| H | 7.52897200  | -3.08152000 | 1.11556100  |
| C | 0.72326200  | -1.24885400 | 0.33298500  |
| C | 1.61443600  | 0.37351100  | -1.90117100 |
| C | 2.43322400  | -0.49349100 | -1.27142600 |
| C | 1.90652400  | -1.72661200 | -0.52839000 |
| H | 1.05338900  | -0.50585300 | 1.06731500  |
| H | 0.25503200  | -2.08521000 | 0.86205500  |
| C | 2.07850300  | 1.68629500  | -2.42207400 |
| C | 1.81998700  | 2.05490400  | -3.75562200 |
| C | 2.72295900  | 2.62627000  | -1.59317500 |
| C | 2.20855700  | 3.30076900  | -4.24902500 |

|    |             |             |             |
|----|-------------|-------------|-------------|
| H  | 1.30862100  | 1.35354500  | -4.40849500 |
| C  | 3.10551900  | 3.87414200  | -2.08506300 |
| H  | 2.92268000  | 2.36636600  | -0.55905600 |
| C  | 2.85285900  | 4.21847700  | -3.41559000 |
| H  | 2.00358000  | 3.55723300  | -5.28513600 |
| H  | 3.60048700  | 4.58136600  | -1.42443900 |
| H  | 3.15016400  | 5.19149500  | -3.79655800 |
| C  | 1.46687900  | -2.83700200 | -1.49778000 |
| H  | 2.29676900  | -3.14501600 | -2.14346200 |
| H  | 1.11696600  | -3.71644600 | -0.94664900 |
| H  | 0.64594700  | -2.49285200 | -2.13380600 |
| Ni | -0.34508400 | -0.30098900 | -0.95632300 |
| P  | -2.22168700 | -1.10500600 | -0.15650700 |
| C  | -3.68990200 | -0.83420200 | -1.21936800 |
| C  | -3.80892900 | 0.39024400  | -1.89535700 |
| C  | -4.71748800 | -1.78378800 | -1.32782900 |
| C  | -4.94733600 | 0.66521700  | -2.65410300 |
| H  | -3.00241400 | 1.11022800  | -1.84056600 |
| C  | -5.85062500 | -1.50629200 | -2.09389400 |
| H  | -4.63869500 | -2.73306100 | -0.80944900 |
| C  | -5.96893300 | -0.28168400 | -2.75586700 |
| H  | -5.03060900 | 1.61640300  | -3.17176300 |
| H  | -6.64169500 | -2.24664700 | -2.17021500 |
| C  | -2.73360900 | -0.43370500 | 1.47227300  |
| C  | -4.07643300 | -0.15800700 | 1.76723200  |
| C  | -1.75348700 | -0.18867000 | 2.44553900  |
| C  | -4.43086000 | 0.35301700  | 3.01689100  |
| H  | -4.84451000 | -0.33229000 | 1.02241000  |
| C  | -2.11260700 | 0.30935600  | 3.69728500  |
| H  | -0.71298400 | -0.38298600 | 2.22169300  |
| C  | -3.45187100 | 0.58525100  | 3.98486400  |
| H  | -5.47299400 | 0.56957700  | 3.23235200  |
| H  | -1.34487500 | 0.49111200  | 4.44327200  |
| C  | -2.18792900 | -2.92205800 | 0.06923200  |
| C  | -1.90602900 | -3.71139000 | -1.05670200 |
| C  | -2.39053200 | -3.53836100 | 1.30903000  |
| C  | -1.83193700 | -5.09762100 | -0.94342800 |
| H  | -1.74391200 | -3.23695600 | -2.01996300 |
| C  | -2.30786300 | -4.92918300 | 1.42146800  |
| H  | -2.60957900 | -2.93855900 | 2.18561700  |
| C  | -2.02878300 | -5.70939300 | 0.29888600  |
| H  | -1.61478200 | -5.69961900 | -1.82082100 |
| H  | -2.46337700 | -5.40034700 | 2.38757200  |
| H  | -3.73004000 | 0.98239100  | 4.95658900  |

|   |             |             |             |
|---|-------------|-------------|-------------|
| H | -1.96482400 | -6.78979600 | 0.38877600  |
| H | -6.85274500 | -0.06765400 | -3.34973300 |

**II-IM4**

|   |             |             |             |
|---|-------------|-------------|-------------|
| H | 1.05449400  | 0.21515700  | -3.23549700 |
| C | 0.81135800  | 1.36424100  | 3.27125500  |
| C | 1.36864900  | 2.61741300  | 3.98239400  |
| H | -0.07661900 | 1.01773800  | 3.82321500  |
| H | 0.58772200  | 3.37345200  | 4.07856900  |
| H | 1.63295200  | 2.32528000  | 5.00566900  |
| C | 0.15049500  | 4.02287500  | 1.54490800  |
| H | -0.31016100 | 4.10056900  | 2.53141100  |
| H | -0.50271600 | 4.58163300  | 0.86521000  |
| C | 1.52618500  | 4.72488600  | 1.53685200  |
| H | 1.85482400  | 4.81424600  | 0.49455400  |
| H | 1.39887600  | 5.75986700  | 1.89019200  |
| C | 0.20381300  | 2.58745300  | 1.07950400  |
| H | 0.00114500  | 2.43577700  | 0.02111800  |
| C | 0.47114300  | 1.49535000  | 1.80779700  |
| H | 0.44449600  | 0.54467900  | 1.27515900  |
| C | 2.64823000  | 4.07131400  | 2.30554300  |
| H | 3.64257600  | 4.37014300  | 1.97037900  |
| C | 2.59504100  | 3.19224600  | 3.31488200  |
| H | 3.54708900  | 2.82420000  | 3.69846400  |
| H | 1.54056900  | 0.55175300  | 3.35851200  |
| O | -0.99508400 | 1.67961500  | -2.00054500 |
| H | -1.85812400 | 1.61739700  | -2.43167700 |
| C | 2.27743900  | -2.91205400 | -1.04179100 |
| C | 3.00913900  | -2.11611200 | 0.07502200  |
| C | 2.85763400  | -0.61572400 | -0.33402500 |
| H | 1.85255700  | -3.84430000 | -0.66873500 |
| H | 2.99640100  | -3.15102000 | -1.83042400 |
| H | 3.81853000  | -0.17533200 | -0.61246800 |
| H | 2.48522200  | -0.05225200 | 0.52344400  |
| C | 2.41497800  | -2.36780300 | 1.46736700  |
| O | 2.20542500  | -1.50965400 | 2.30066600  |
| O | 2.18052500  | -3.66968900 | 1.67193200  |
| C | 4.48752600  | -2.48631000 | 0.18806500  |
| O | 5.04684800  | -2.79982100 | 1.22032800  |
| O | 5.11090900  | -2.38876000 | -0.99647500 |
| C | 1.69181900  | -4.01964800 | 2.98092800  |
| H | 0.73107000  | -3.53646700 | 3.16949600  |
| H | 1.57533900  | -5.10332600 | 2.96973300  |
| H | 2.41062200  | -3.72105600 | 3.74779100  |

|    |             |             |             |
|----|-------------|-------------|-------------|
| C  | 6.52471000  | -2.67148100 | -0.98835400 |
| H  | 6.85341800  | -2.54426300 | -2.01957600 |
| H  | 7.05054700  | -1.97370500 | -0.33218500 |
| H  | 6.70850500  | -3.69510500 | -0.65323600 |
| C  | -0.01634200 | -1.76196900 | -0.69518000 |
| C  | 1.68406500  | 0.42557900  | -2.37530900 |
| C  | 1.90727100  | -0.59140300 | -1.51036000 |
| C  | 1.21061600  | -1.94998700 | -1.60103600 |
| H  | 0.23726500  | -1.77068400 | 0.36896000  |
| H  | -0.76861700 | -2.54029700 | -0.86807900 |
| C  | 2.29862000  | 1.75961600  | -2.40115400 |
| C  | 2.31403600  | 2.44891500  | -3.62907100 |
| C  | 2.89178900  | 2.38200800  | -1.28721300 |
| C  | 2.92438600  | 3.69466700  | -3.75251200 |
| H  | 1.84559900  | 1.98849100  | -4.49507700 |
| C  | 3.50978000  | 3.62614800  | -1.41373800 |
| H  | 2.84320700  | 1.91896800  | -0.31131700 |
| C  | 3.53472700  | 4.28712900  | -2.64371000 |
| H  | 2.92491300  | 4.20274400  | -4.71276100 |
| H  | 3.96609100  | 4.08323200  | -0.54087700 |
| H  | 4.01559300  | 5.25672000  | -2.73517900 |
| C  | 0.77655100  | -2.36318000 | -3.00870600 |
| H  | 1.62090400  | -2.36403000 | -3.70628000 |
| H  | 0.34951500  | -3.37163300 | -2.98321600 |
| H  | 0.00550500  | -1.69210000 | -3.40112100 |
| Ni | -0.59877600 | 0.03204700  | -1.19871100 |
| P  | -2.50762700 | -0.24064600 | -0.23219200 |
| C  | -3.23676000 | 1.19081500  | 0.65752600  |
| C  | -2.94893300 | 2.49059400  | 0.21540000  |
| C  | -4.10442500 | 1.00626100  | 1.74576900  |
| C  | -3.53051700 | 3.58821400  | 0.85066600  |
| H  | -2.25233600 | 2.61241200  | -0.61055100 |
| C  | -4.67728100 | 2.10968500  | 2.38031100  |
| H  | -4.33146700 | 0.00797600  | 2.10252700  |
| C  | -4.39166300 | 3.40193300  | 1.93461900  |
| H  | -3.30015300 | 4.59182800  | 0.50492500  |
| H  | -5.34508300 | 1.95732900  | 3.22325000  |
| C  | -2.58830500 | -1.58385600 | 1.00925800  |
| C  | -1.89963500 | -1.40939700 | 2.22049400  |
| C  | -3.24949000 | -2.79269500 | 0.76302100  |
| C  | -1.89174800 | -2.42253400 | 3.17697500  |
| H  | -1.37827500 | -0.47869700 | 2.41606300  |
| C  | -3.22923400 | -3.81147400 | 1.71954500  |
| H  | -3.78092600 | -2.94285400 | -0.17053600 |

|   |             |             |             |
|---|-------------|-------------|-------------|
| C | -2.55482800 | -3.62852600 | 2.92716500  |
| H | -1.36717300 | -2.27028300 | 4.11561800  |
| H | -3.74581700 | -4.74563600 | 1.51921500  |
| C | -3.76514700 | -0.68986800 | -1.48834500 |
| C | -3.33293400 | -1.26130800 | -2.69429800 |
| C | -5.13771900 | -0.50115600 | -1.26872500 |
| C | -4.25991400 | -1.64806600 | -3.66314800 |
| H | -2.27012900 | -1.39975900 | -2.86692400 |
| C | -6.06149200 | -0.88471200 | -2.24067900 |
| H | -5.48392700 | -0.05210500 | -0.34386600 |
| C | -5.62490100 | -1.45955900 | -3.43745800 |
| H | -3.91541800 | -2.09065600 | -4.59317300 |
| H | -7.12230200 | -0.73262900 | -2.06441300 |
| H | -2.54449600 | -4.41955300 | 3.67125300  |
| H | -6.34688800 | -1.75530900 | -4.19292800 |
| H | -4.83613900 | 4.25917900  | 2.43217400  |

### II-TS3

|   |             |             |             |
|---|-------------|-------------|-------------|
| C | -0.06435500 | -4.23578100 | 2.47042200  |
| C | -1.54526300 | -3.80293600 | 2.44251900  |
| H | 0.20223800  | -4.67280200 | 1.49711800  |
| H | -1.72494700 | -3.12792000 | 1.60722600  |
| H | -2.14417000 | -4.69587200 | 2.23101300  |
| C | -0.30609800 | -0.99864200 | 2.33043600  |
| H | -0.82313600 | -1.43215300 | 1.47476600  |
| H | 0.07327300  | -0.03315100 | 1.98146500  |
| C | -1.29775500 | -0.72501400 | 3.47849200  |
| H | -0.77424600 | -0.15499500 | 4.25847700  |
| H | -2.08423400 | -0.04866000 | 3.11270800  |
| C | 0.87028400  | -1.84453200 | 2.75286800  |
| H | 1.74405100  | -1.28468800 | 3.07966400  |
| C | 0.96003900  | -3.18271400 | 2.80661500  |
| H | 1.91444800  | -3.58707700 | 3.14567200  |
| C | -1.93979000 | -1.91749700 | 4.14282500  |
| H | -2.37980900 | -1.68536900 | 5.11348500  |
| C | -2.03918300 | -3.18939200 | 3.73191900  |
| H | -2.52990100 | -3.88345400 | 4.41458000  |
| H | 0.04988700  | -5.04804100 | 3.20056500  |
| H | -2.85413000 | -1.07940400 | -2.37639800 |
| C | 0.11095600  | 0.90253000  | -1.18419600 |
| C | -3.04637700 | -0.70845100 | -1.37505400 |
| C | -2.35064800 | 0.35980100  | -0.96150300 |
| C | -1.30712100 | 1.10270300  | -1.78390000 |
| C | -2.61497500 | 1.17826100  | 0.27275400  |

|    |             |             |             |
|----|-------------|-------------|-------------|
| C  | -2.66920000 | 2.61755700  | -0.30533600 |
| C  | -1.69735400 | 2.60511100  | -1.52114700 |
| H  | 0.08839400  | 1.36591500  | -0.19379700 |
| H  | 0.78946200  | 1.53266000  | -1.77785700 |
| H  | -3.53027300 | 0.91338500  | 0.80023600  |
| H  | -1.79314000 | 1.12693600  | 0.99214100  |
| H  | -0.80946400 | 3.20797100  | -1.31932700 |
| H  | -2.20597200 | 3.03465300  | -2.38590800 |
| C  | -4.10729300 | 2.87672200  | -0.77205900 |
| O  | -4.49241000 | 2.89254900  | -1.92133300 |
| O  | -4.91949200 | 3.04177300  | 0.28778800  |
| C  | -2.31637900 | 3.66760900  | 0.73852300  |
| O  | -1.99048200 | 3.44566100  | 1.88675800  |
| O  | -2.42096500 | 4.90051800  | 0.21259800  |
| C  | -6.31848500 | 3.21713300  | -0.01005700 |
| H  | -6.70573100 | 2.34679600  | -0.54521600 |
| H  | -6.81373900 | 3.31884300  | 0.95559400  |
| H  | -6.47302900 | 4.11521800  | -0.61303400 |
| C  | -2.17755700 | 6.00025100  | 1.11099600  |
| H  | -2.85623800 | 5.95144500  | 1.96616200  |
| H  | -1.14411100 | 5.98938400  | 1.46240400  |
| H  | -2.36684900 | 6.90155100  | 0.52800800  |
| C  | -4.06669500 | -1.45760800 | -0.62737800 |
| C  | -5.12004200 | -2.07096700 | -1.33181200 |
| C  | -4.00834300 | -1.64664300 | 0.76587400  |
| C  | -6.09559600 | -2.81237200 | -0.66780300 |
| H  | -5.16553500 | -1.95852800 | -2.41185500 |
| C  | -4.98317200 | -2.38995600 | 1.43169100  |
| H  | -3.17406700 | -1.24306300 | 1.32625200  |
| C  | -6.03487900 | -2.97166700 | 0.72027200  |
| H  | -6.90183000 | -3.27150000 | -1.23334700 |
| H  | -4.90280600 | -2.52978100 | 2.50578600  |
| H  | -6.79062300 | -3.55518900 | 1.23806300  |
| C  | -1.33747600 | 0.80495000  | -3.28125100 |
| H  | -2.33031600 | 0.99391500  | -3.70317300 |
| H  | -0.61997300 | 1.44928300  | -3.80251300 |
| H  | -1.06599500 | -0.22938300 | -3.49035800 |
| Ni | 1.13529900  | -0.69173600 | -0.71571500 |
| P  | 2.79265200  | 0.68139400  | 0.05691500  |
| C  | 3.70489400  | 0.10871200  | 1.54511400  |
| C  | 3.60435100  | 0.75701900  | 2.78406000  |
| C  | 4.47403700  | -1.06482500 | 1.45069700  |
| C  | 4.23411500  | 0.22756800  | 3.91253600  |
| H  | 3.04007900  | 1.67640900  | 2.87923400  |

|   |             |             |             |
|---|-------------|-------------|-------------|
| C | 5.10121600  | -1.58841500 | 2.57989300  |
| H | 4.56896900  | -1.57233500 | 0.49995000  |
| C | 4.97615400  | -0.95017700 | 3.81663900  |
| H | 4.14407700  | 0.74190300  | 4.86485400  |
| H | 5.68763800  | -2.49830100 | 2.49151100  |
| C | 2.43396800  | 2.45139200  | 0.37305500  |
| C | 3.05199100  | 3.47831600  | -0.35344400 |
| C | 1.45907700  | 2.78590400  | 1.32856300  |
| C | 2.71642800  | 4.81254200  | -0.11371300 |
| H | 3.79418700  | 3.24320000  | -1.10717100 |
| C | 1.13835600  | 4.11912500  | 1.57817500  |
| H | 0.94408800  | 2.00466600  | 1.87760300  |
| C | 1.76563200  | 5.13645800  | 0.85503000  |
| H | 3.20290100  | 5.59751800  | -0.68520800 |
| H | 0.37873500  | 4.35284800  | 2.31493200  |
| C | 4.06396500  | 0.70002700  | -1.25814300 |
| C | 5.39133300  | 1.07410600  | -0.99536900 |
| C | 3.68478500  | 0.37207200  | -2.56652400 |
| C | 6.32012300  | 1.13133900  | -2.03362100 |
| H | 5.69413900  | 1.32436900  | 0.01623300  |
| C | 4.61617700  | 0.43403900  | -3.60412700 |
| H | 2.66590400  | 0.05662600  | -2.76350300 |
| C | 5.93289500  | 0.81419700  | -3.33924100 |
| H | 7.34515400  | 1.42298900  | -1.82442800 |
| H | 4.31477500  | 0.17485500  | -4.61483100 |
| H | 1.50896700  | 6.17522400  | 1.04108900  |
| H | 6.65935800  | 0.85806900  | -4.14560400 |
| H | 5.46074800  | -1.36392900 | 4.69609700  |
| C | 0.27031100  | -2.40887700 | -1.84028900 |
| C | -0.85242200 | -3.02057100 | -1.23820100 |
| C | -1.88558600 | -3.58679800 | -1.98309300 |
| C | -1.85661500 | -3.50214100 | -3.37820900 |
| C | -0.79234400 | -2.85381500 | -4.01317900 |
| C | 0.24979800  | -2.32371800 | -3.24936200 |
| H | -0.88019500 | -3.11615200 | -0.15863900 |
| H | -2.71669900 | -4.07518500 | -1.48371600 |
| H | -2.65639400 | -3.94262200 | -3.96779100 |
| H | -0.76868600 | -2.78258500 | -5.09775100 |
| H | 1.10585900  | -1.88385100 | -3.75433700 |
| O | 2.25559900  | -2.16535200 | -0.03901300 |
| H | 1.85144400  | -2.47006800 | 0.79447800  |
| B | 1.91873100  | -3.03526100 | -1.16308900 |
| O | 1.64705100  | -4.36604500 | -0.70278000 |
| O | 2.90262900  | -2.85435600 | -2.17771700 |

|   |            |             |             |
|---|------------|-------------|-------------|
| H | 0.99080000 | -4.80136300 | -1.25711700 |
| H | 2.84014400 | -3.57480500 | -2.81491800 |

**II-IM5**

|   |             |             |             |
|---|-------------|-------------|-------------|
| C | -0.86757600 | -3.73634000 | 2.95206100  |
| C | -2.30271900 | -3.23917600 | 2.69215400  |
| H | -0.55528400 | -4.38720900 | 2.12452400  |
| H | -2.34847100 | -2.69775300 | 1.74833100  |
| H | -2.93338200 | -4.12411200 | 2.55078800  |
| C | -0.88196800 | -0.52440100 | 2.33413700  |
| H | -1.38539900 | -1.02320700 | 1.50686000  |
| H | -0.42619000 | 0.37342700  | 1.90953400  |
| C | -1.91131500 | -0.05930000 | 3.38056400  |
| H | -1.38600600 | 0.52904900  | 4.14593400  |
| H | -2.59735000 | 0.65488600  | 2.90325800  |
| C | 0.21225700  | -1.38325400 | 2.91556200  |
| H | 1.10887900  | -0.84152200 | 3.20629000  |
| C | 0.20836500  | -2.70368300 | 3.16342200  |
| H | 1.12127600  | -3.11197100 | 3.59936000  |
| C | -2.71897300 | -1.11506800 | 4.09002900  |
| H | -3.24503200 | -0.73459000 | 4.96699600  |
| C | -2.88502700 | -2.41737000 | 3.81964600  |
| H | -3.51070100 | -2.97698100 | 4.51543500  |
| H | -0.87548100 | -4.38120000 | 3.84197100  |
| H | -2.80803300 | -1.02407400 | -2.81987600 |
| C | 0.03319600  | 0.90568700  | -1.42054400 |
| C | -3.11487800 | -0.60610300 | -1.86483400 |
| C | -2.47347900 | 0.48753500  | -1.42423900 |
| C | -1.31949100 | 1.17999800  | -2.13258300 |
| C | -2.81447800 | 1.28961600  | -0.19618300 |
| C | -2.44358400 | 2.76100500  | -0.54693900 |
| C | -1.67422200 | 2.68126400  | -1.89779500 |
| H | -0.02023400 | 1.36238800  | -0.42361200 |
| H | 0.79628700  | 1.46967200  | -1.97408900 |
| H | -3.85953000 | 1.19253300  | 0.10199500  |
| H | -2.20780100 | 0.98542400  | 0.65835200  |
| H | -0.78671300 | 3.31838300  | -1.90896000 |
| H | -2.35062700 | 3.03732500  | -2.67920700 |
| C | -3.72932000 | 3.58235500  | -0.68412400 |
| O | -4.20653600 | 4.00372400  | -1.71555600 |
| O | -4.30054500 | 3.74741700  | 0.52383500  |
| C | -1.61769800 | 3.40492600  | 0.56628100  |
| O | -1.12335400 | 2.83003400  | 1.51679100  |
| O | -1.50114100 | 4.72883000  | 0.36707000  |



|    |             |             |             |
|----|-------------|-------------|-------------|
| C  | -5.52654700 | 4.50336300  | 0.54587500  |
| H  | -6.29310700 | 4.00986400  | -0.05635500 |
| H  | -5.83155800 | 4.53735700  | 1.59173700  |
| H  | -5.35955100 | 5.51415000  | 0.16536000  |
| C  | -0.89751800 | 5.47853100  | 1.44112400  |
| H  | -1.53019400 | 5.42690900  | 2.33110500  |
| H  | 0.09517900  | 5.09542200  | 1.68168500  |
| H  | -0.83447100 | 6.50577500  | 1.08296400  |
| C  | -4.18854300 | -1.35383500 | -1.19739800 |
| C  | -5.07978000 | -2.11238200 | -1.98141600 |
| C  | -4.33936000 | -1.40847900 | 0.20207800  |
| C  | -6.09885300 | -2.86191400 | -1.39778800 |
| H  | -4.96153700 | -2.10790300 | -3.06194200 |
| C  | -5.35705800 | -2.16127900 | 0.78795900  |
| H  | -3.63163000 | -0.89531500 | 0.84020900  |
| C  | -6.24697200 | -2.88636600 | -0.00737700 |
| H  | -6.77620500 | -3.43288700 | -2.02711400 |
| H  | -5.43774900 | -2.19261100 | 1.87097600  |
| H  | -7.03691900 | -3.47545500 | 0.44963200  |
| C  | -1.23440900 | 0.90510300  | -3.63447800 |
| H  | -2.17215900 | 1.16732800  | -4.13696700 |
| H  | -0.43248100 | 1.50644000  | -4.07883000 |
| H  | -1.01636400 | -0.14276600 | -3.84022600 |
| Ni | 0.94173900  | -0.68799900 | -0.81419600 |
| P  | 2.82498500  | 0.53315800  | -0.02088400 |
| C  | 3.17943200  | 0.44473500  | 1.78452100  |
| C  | 2.82245300  | 1.48080600  | 2.65934800  |
| C  | 3.69948500  | -0.74545700 | 2.32291900  |
| C  | 2.98044200  | 1.33072500  | 4.03853000  |
| H  | 2.42442100  | 2.41130000  | 2.27193000  |
| C  | 3.86640200  | -0.88794400 | 3.70019400  |
| H  | 3.97389800  | -1.56094300 | 1.66469800  |
| C  | 3.50260700  | 0.14773700  | 4.56436600  |
| H  | 2.69771400  | 2.14418600  | 4.70040000  |
| H  | 4.27611900  | -1.81215900 | 4.09740700  |
| C  | 3.01752200  | 2.30893500  | -0.47020700 |
| C  | 4.08605600  | 2.75619100  | -1.26249800 |
| C  | 2.01561600  | 3.22771100  | -0.10937200 |
| C  | 4.15774800  | 4.08792400  | -1.67547800 |
| H  | 4.86554300  | 2.06665000  | -1.56335000 |
| C  | 2.09137600  | 4.55799900  | -0.52318700 |
| H  | 1.17122000  | 2.90417300  | 0.48747100  |
| C  | 3.16081300  | 4.99219100  | -1.30882100 |
| H  | 4.99384400  | 4.41452000  | -2.28719000 |

|   |             |             |             |
|---|-------------|-------------|-------------|
| H | 1.30576600  | 5.25271300  | -0.24759000 |
| C | 4.29520700  | -0.24206600 | -0.79360200 |
| C | 5.58316400  | -0.15549800 | -0.24230400 |
| C | 4.11662200  | -0.89658900 | -2.01997500 |
| C | 6.67036300  | -0.72629300 | -0.90334200 |
| H | 5.73490900  | 0.35823600  | 0.70125400  |
| C | 5.20725000  | -1.45931600 | -2.68489600 |
| H | 3.11938600  | -0.97323200 | -2.44204100 |
| C | 6.48361000  | -1.37880700 | -2.12591800 |
| H | 7.66302500  | -0.65863400 | -0.46761100 |
| H | 5.05637500  | -1.96949300 | -3.63181100 |
| H | 3.21207000  | 6.02643700  | -1.63618900 |
| H | 7.33183000  | -1.82320500 | -2.63877000 |
| H | 3.62577900  | 0.03375700  | 5.63724700  |
| C | -0.14054000 | -1.95268400 | -1.70890700 |
| C | -0.98239400 | -2.81639500 | -0.98529700 |
| C | -1.64879600 | -3.88664400 | -1.58924000 |
| C | -1.48570600 | -4.13089700 | -2.95531600 |
| C | -0.63532800 | -3.30412700 | -3.69605100 |
| C | 0.02412500  | -2.23512500 | -3.07736400 |
| H | -1.12698300 | -2.65623900 | 0.07795800  |
| H | -2.30563800 | -4.51862200 | -0.99528700 |
| H | -2.00859600 | -4.95428100 | -3.43516100 |
| H | -0.48861400 | -3.48965400 | -4.75840900 |
| H | 0.68014200  | -1.61275300 | -3.68183500 |
| O | 1.80519400  | -2.27482300 | 0.33254300  |
| H | 1.32560400  | -2.24931700 | 1.18679000  |
| B | 1.96013300  | -3.56708800 | -0.14628300 |
| O | 1.47042600  | -4.58426400 | 0.63105700  |
| O | 2.64810700  | -3.70719900 | -1.31426500 |
| H | 1.59346000  | -5.46800700 | 0.26138400  |
| H | 2.70046900  | -4.61519800 | -1.63682500 |

## II-IM6

|   |             |             |             |
|---|-------------|-------------|-------------|
| C | 0.02809900  | -1.95042400 | -1.82052700 |
| C | -0.92685600 | -2.97809800 | -1.73484800 |
| C | -1.06491700 | -3.94368600 | -2.73799600 |
| C | -0.24569100 | -3.90855700 | -3.86979200 |
| C | 0.70035500  | -2.88769800 | -3.99004700 |
| C | 0.82225700  | -1.92021100 | -2.98548600 |
| H | -1.59077500 | -3.02973200 | -0.88132700 |
| H | -1.81555700 | -4.72436900 | -2.63361100 |
| H | -0.35180000 | -4.65731200 | -4.65033400 |
| H | 1.33468400  | -2.83462400 | -4.87244100 |

|   |             |             |             |
|---|-------------|-------------|-------------|
| H | 1.54413200  | -1.11856900 | -3.12454100 |
| C | 1.67366500  | -3.91603900 | 0.52181200  |
| C | 1.98396900  | -4.96973500 | 1.60500700  |
| H | 0.83161200  | -4.22587900 | -0.09442100 |
| H | 2.18247500  | -5.93222700 | 1.10973000  |
| H | 2.93145300  | -4.69886800 | 2.09075500  |
| C | -1.07165400 | -2.62826300 | 1.71892000  |
| H | -1.74805400 | -2.19684500 | 0.97485600  |
| H | -1.46191100 | -2.28445900 | 2.68581100  |
| C | -1.17077500 | -4.16599900 | 1.67711900  |
| H | -2.22375700 | -4.42343200 | 1.83829600  |
| H | -0.92132100 | -4.53144800 | 0.68099900  |
| C | 0.29269900  | -2.00871000 | 1.56657100  |
| H | 0.36514900  | -1.01871400 | 2.01652400  |
| C | 1.44789100  | -2.54449600 | 1.10164500  |
| H | 2.35408400  | -1.96884600 | 1.26611500  |
| C | -0.33785900 | -4.84981200 | 2.73580800  |
| H | -0.86958100 | -5.08308500 | 3.65867500  |
| C | 0.96074000  | -5.17605700 | 2.69453900  |
| H | 1.36501200  | -5.67126800 | 3.57850000  |
| H | 2.53760700  | -3.86417100 | -0.14981100 |
| H | -3.29313700 | -1.49920200 | -1.84897800 |
| C | -0.31408200 | 0.70610700  | -1.36924800 |
| C | -3.40633900 | -0.97926600 | -0.90252900 |
| C | -2.71034800 | 0.16067700  | -0.74943200 |
| C | -1.79956900 | 0.77069200  | -1.80820700 |
| C | -2.80270800 | 1.13744500  | 0.39445800  |
| C | -2.63935600 | 2.54328500  | -0.26561900 |
| C | -2.24116900 | 2.26240000  | -1.74370100 |
| H | -0.16902000 | 1.42039600  | -0.55046900 |
| H | 0.31289300  | 1.04507200  | -2.20143700 |
| H | -3.73961800 | 1.05784600  | 0.94743400  |
| H | -1.99110100 | 0.99894800  | 1.11644600  |
| H | -1.46067800 | 2.93944400  | -2.09739700 |
| H | -3.12935600 | 2.41906700  | -2.36120000 |
| C | -3.98129900 | 3.27711200  | -0.18345200 |
| O | -4.77908800 | 3.40775600  | -1.08663600 |
| O | -4.19452700 | 3.71850600  | 1.06950900  |
| C | -1.60365100 | 3.39591300  | 0.46636500  |
| O | -0.90407500 | 3.03761600  | 1.39314900  |
| O | -1.56187500 | 4.63125000  | -0.06051300 |
| C | -5.45598000 | 4.37546000  | 1.30249600  |
| H | -6.28576400 | 3.69649100  | 1.09181100  |
| H | -5.45169000 | 4.65275300  | 2.35651400  |

|    |             |             |             |
|----|-------------|-------------|-------------|
| H  | -5.54639400 | 5.26603600  | 0.67567400  |
| C  | -0.71731200 | 5.58506200  | 0.61462200  |
| H  | -1.06930300 | 5.73960000  | 1.63780400  |
| H  | 0.32037700  | 5.24882400  | 0.63571000  |
| H  | -0.80416900 | 6.50824300  | 0.04217900  |
| C  | -4.33528900 | -1.63974900 | 0.02444900  |
| C  | -5.27536900 | -2.54232200 | -0.51331500 |
| C  | -4.32627500 | -1.46377700 | 1.42305300  |
| C  | -6.18500900 | -3.21431000 | 0.29959400  |
| H  | -5.28621700 | -2.70786800 | -1.58750300 |
| C  | -5.23542600 | -2.13898600 | 2.23765000  |
| H  | -3.58051600 | -0.82937600 | 1.88429200  |
| C  | -6.17337800 | -3.01234900 | 1.68267200  |
| H  | -6.90118100 | -3.89973000 | -0.14513900 |
| H  | -5.20138800 | -1.98910500 | 3.31329800  |
| H  | -6.87792800 | -3.53841500 | 2.32022000  |
| C  | -2.00751500 | 0.22766600  | -3.22232800 |
| H  | -3.05149100 | 0.33887000  | -3.53518900 |
| H  | -1.38141600 | 0.78393600  | -3.92899700 |
| H  | -1.73192200 | -0.82435700 | -3.29788900 |
| Ni | 0.56953200  | -0.75466900 | -0.47615300 |
| P  | 2.45481600  | 0.63084800  | 0.21424500  |
| C  | 2.79064000  | 1.40716800  | 1.85330600  |
| C  | 3.38143100  | 2.67117900  | 2.00031900  |
| C  | 2.47162300  | 0.67208300  | 3.00640800  |
| C  | 3.63553000  | 3.19107100  | 3.27076000  |
| H  | 3.64623800  | 3.25180100  | 1.12437000  |
| C  | 2.73296300  | 1.18941600  | 4.27501100  |
| H  | 2.02777400  | -0.31295400 | 2.91668900  |
| C  | 3.31212700  | 2.45313900  | 4.41093000  |
| H  | 4.09241400  | 4.17188400  | 3.36695100  |
| H  | 2.48144500  | 0.60611100  | 5.15596700  |
| C  | 2.66770100  | 2.02104400  | -0.96791300 |
| C  | 3.53330400  | 1.93638000  | -2.06686800 |
| C  | 1.85402100  | 3.15878000  | -0.83107400 |
| C  | 3.58793700  | 2.97035900  | -3.00468700 |
| H  | 4.16954300  | 1.06746900  | -2.19493100 |
| C  | 1.91410400  | 4.19154400  | -1.76538300 |
| H  | 1.18107800  | 3.23786000  | 0.01542200  |
| C  | 2.77986700  | 4.09903400  | -2.85844000 |
| H  | 4.26765800  | 2.89209100  | -3.84842800 |
| H  | 1.28090100  | 5.06528900  | -1.64221200 |
| C  | 3.97697500  | -0.36841200 | -0.06217100 |
| C  | 5.19018100  | -0.09362600 | 0.58454400  |

|   |            |             |             |
|---|------------|-------------|-------------|
| C | 3.91562800 | -1.43265100 | -0.97539700 |
| C | 6.32162400 | -0.86586000 | 0.31628500  |
| H | 5.25310100 | 0.72319500  | 1.29565500  |
| C | 5.04986700 | -2.19807900 | -1.24895400 |
| H | 2.97626100 | -1.66387300 | -1.46634400 |
| C | 6.25463200 | -1.91845600 | -0.59981800 |
| H | 7.25572300 | -0.64546600 | 0.82505400  |
| H | 4.98745200 | -3.01664400 | -1.96025800 |
| H | 2.82400900 | 4.90075600  | -3.58977100 |
| H | 7.13685800 | -2.51759000 | -0.80579200 |
| H | 3.51046100 | 2.85911200  | 5.39852500  |

#### II-TS4

|   |             |             |             |
|---|-------------|-------------|-------------|
| C | 1.25162900  | -5.29777000 | 0.06011500  |
| C | 2.48113800  | -4.72804300 | -0.67829400 |
| H | 1.48754200  | -5.36395300 | 1.13353600  |
| H | 2.74461800  | -3.75284700 | -0.27094000 |
| H | 3.33103300  | -5.38158400 | -0.45228300 |
| C | 0.66839700  | -2.29321700 | -1.02159100 |
| H | 1.56834600  | -2.28841000 | -0.41106700 |
| H | 0.21086200  | -1.30716600 | -0.88260000 |
| C | 1.03986000  | -2.44328600 | -2.50727500 |
| H | 0.12705800  | -2.34237200 | -3.10667800 |
| H | 1.67042200  | -1.59288800 | -2.80559900 |
| C | -0.31139200 | -3.34018900 | -0.55850500 |
| H | -1.35679600 | -3.04812100 | -0.63153000 |
| C | -0.06280300 | -4.57807000 | -0.11283000 |
| H | -0.93027700 | -5.17618100 | 0.17087000  |
| C | 1.72077900  | -3.72247100 | -2.92102600 |
| H | 1.71677700  | -3.88546800 | -4.00008700 |
| C | 2.31518200  | -4.66667900 | -2.17931800 |
| H | 2.71958500  | -5.52375300 | -2.71884700 |
| H | 1.10270700  | -6.33819000 | -0.26131600 |
| H | 3.20264400  | -0.79920500 | 2.37535300  |
| C | 0.37372800  | 1.52101600  | 2.17387100  |
| C | 3.24233600  | -0.40373900 | 1.36425200  |
| C | 2.61055700  | 0.76298300  | 1.14347000  |
| C | 1.91757100  | 1.57193800  | 2.24049600  |
| C | 2.64443900  | 1.57631200  | -0.13100800 |
| C | 2.35710100  | 3.04795100  | 0.29920900  |
| C | 2.35359800  | 3.00875900  | 1.84841000  |
| H | 0.00109900  | 2.16287800  | 1.33285600  |
| H | -0.03524400 | 1.99116800  | 3.06850300  |
| H | 3.61548800  | 1.48817600  | -0.62579600 |

|    |             |             |             |
|----|-------------|-------------|-------------|
| H  | 1.88743300  | 1.26307600  | -0.85587400 |
| H  | 1.71821700  | 3.78073100  | 2.28686400  |
| H  | 3.37959200  | 3.18484000  | 2.18239200  |
| C  | 3.46991000  | 3.96000300  | -0.22543800 |
| O  | 4.42998600  | 4.33658700  | 0.41198600  |
| O  | 3.27019600  | 4.25399300  | -1.52093300 |
| C  | 1.03663000  | 3.54401600  | -0.30602400 |
| O  | 0.37727600  | 2.96401600  | -1.14629200 |
| O  | 0.69837600  | 4.73567000  | 0.20484100  |
| C  | 4.28259600  | 5.06680000  | -2.14931200 |
| H  | 5.24388700  | 4.54760900  | -2.14501400 |
| H  | 3.94005700  | 5.22185500  | -3.17213700 |
| H  | 4.38090600  | 6.02327700  | -1.63090100 |
| C  | -0.52935700 | 5.31090100  | -0.29080000 |
| H  | -0.46689800 | 5.47438800  | -1.36921200 |
| H  | -1.37447700 | 4.65524000  | -0.06837200 |
| H  | -0.63645900 | 6.26075100  | 0.23263700  |
| C  | 4.03574000  | -1.23206800 | 0.44908300  |
| C  | 4.89693600  | -2.19307600 | 1.01807500  |
| C  | 3.98259800  | -1.15259900 | -0.95704600 |
| C  | 5.69055500  | -3.01729500 | 0.22452300  |
| H  | 4.94006500  | -2.28210000 | 2.10052700  |
| C  | 4.77402100  | -1.98158600 | -1.75094600 |
| H  | 3.29432000  | -0.47118500 | -1.43800800 |
| C  | 5.63571300  | -2.91292200 | -1.16803100 |
| H  | 6.34771700  | -3.74527900 | 0.69191400  |
| H  | 4.70485900  | -1.90891700 | -2.83224000 |
| H  | 6.24603800  | -3.55994100 | -1.79103900 |
| C  | 2.38011400  | 1.22907700  | 3.65950200  |
| H  | 3.47066200  | 1.27025300  | 3.73953900  |
| H  | 1.95814200  | 1.94566800  | 4.37220900  |
| H  | 2.04640900  | 0.23238900  | 3.95894800  |
| Ni | -0.75617300 | 0.52813800  | 0.93213900  |
| P  | -2.45537300 | 0.09392600  | -0.34687200 |
| C  | -2.18242600 | -0.36763500 | -2.10635200 |
| C  | -1.25532900 | 0.40841200  | -2.82436200 |
| C  | -2.82962800 | -1.42920600 | -2.74944200 |
| C  | -1.00749700 | 0.14249400  | -4.16969300 |
| H  | -0.73323900 | 1.22100300  | -2.32608200 |
| C  | -2.56674000 | -1.70273900 | -4.09518900 |
| H  | -3.54082000 | -2.04192000 | -2.20635900 |
| C  | -1.66284500 | -0.91499700 | -4.80922300 |
| H  | -0.29435100 | 0.75253500  | -4.71696300 |
| H  | -3.07225300 | -2.53099700 | -4.58339700 |

|   |             |             |             |
|---|-------------|-------------|-------------|
| C | -3.51689800 | 1.59583600  | -0.50250800 |
| C | -3.59658900 | 2.45148500  | 0.60804500  |
| C | -4.23404600 | 1.91857600  | -1.66244900 |
| C | -4.38476400 | 3.60164800  | 0.56336700  |
| H | -3.03037700 | 2.21038300  | 1.50369000  |
| C | -5.01977800 | 3.07293200  | -1.70798500 |
| H | -4.17785800 | 1.27302100  | -2.53251700 |
| C | -5.09663300 | 3.91627800  | -0.59805700 |
| H | -4.43645200 | 4.25497900  | 1.42977900  |
| H | -5.57026100 | 3.31303200  | -2.61319800 |
| C | -3.62815300 | -1.17084200 | 0.29165800  |
| C | -4.97964300 | -1.20098700 | -0.08627000 |
| C | -3.14506800 | -2.13671200 | 1.18654900  |
| C | -5.82699100 | -2.19309100 | 0.40806700  |
| H | -5.36935500 | -0.45034000 | -0.76644000 |
| C | -3.99388800 | -3.13130300 | 1.67612900  |
| H | -2.10841000 | -2.10604700 | 1.49988200  |
| C | -5.33434300 | -3.16195700 | 1.28739000  |
| H | -6.87107800 | -2.20928600 | 0.10878200  |
| H | -3.60607200 | -3.87429700 | 2.36676500  |
| H | -5.70455100 | 4.81550000  | -0.63754000 |
| H | -5.99603100 | -3.93296900 | 1.67173900  |
| H | -1.46221900 | -1.12800000 | -5.85516500 |
| C | -0.45686600 | -0.25186700 | 2.61280000  |
| C | 0.27519600  | -1.45729600 | 2.55928800  |
| C | 0.02879000  | -2.48741100 | 3.47222800  |
| C | -0.92768400 | -2.33279700 | 4.47895200  |
| C | -1.63337800 | -1.12693100 | 4.56899200  |
| C | -1.39237600 | -0.09780700 | 3.66018900  |
| H | 1.01941400  | -1.60100200 | 1.78763100  |
| H | 0.58644000  | -3.41715100 | 3.39055300  |
| H | -1.11310300 | -3.13240400 | 5.19039800  |
| H | -2.37484300 | -0.98884200 | 5.35225700  |
| H | -1.94414000 | 0.83417500  | 3.75183400  |

## II-IM7

|   |             |             |             |
|---|-------------|-------------|-------------|
| C | -0.33236700 | -4.04937700 | -0.92738500 |
| C | 1.16822800  | -4.35654100 | -0.74660100 |
| H | -0.80220600 | -3.96405900 | 0.06367900  |
| H | 1.65419500  | -3.55943200 | -0.18404000 |
| H | 1.24890400  | -5.25213800 | -0.12087000 |
| C | 1.50182600  | -1.52644900 | -1.89479200 |
| H | 1.79727800  | -1.78860900 | -0.87869600 |
| H | 1.67747800  | -0.45055900 | -1.98990700 |

|   |             |             |             |
|---|-------------|-------------|-------------|
| C | 2.42831800  | -2.24283400 | -2.89614000 |
| H | 2.19927200  | -1.88014600 | -3.90804800 |
| H | 3.46500800  | -1.92447200 | -2.70757200 |
| C | 0.03515000  | -1.79601700 | -2.13601700 |
| H | -0.47507400 | -1.04399300 | -2.73656500 |
| C | -0.70805100 | -2.83728600 | -1.73934500 |
| H | -1.75543100 | -2.82341200 | -2.03480300 |
| C | 2.38706500  | -3.74899200 | -2.93130600 |
| H | 2.85578600  | -4.17399000 | -3.82049600 |
| C | 1.88186500  | -4.62384600 | -2.05154500 |
| H | 1.96287400  | -5.67821300 | -2.31802500 |
| H | -0.81503600 | -4.92098900 | -1.39226900 |
| H | 2.76740500  | -0.97536900 | 2.93466300  |
| C | 1.08525100  | 1.60465800  | 1.60704100  |
| C | 3.27688800  | -0.86923900 | 1.98064000  |
| C | 3.28814200  | 0.36725300  | 1.45082900  |
| C | 2.57806600  | 1.55545700  | 2.09840100  |
| C | 3.95278300  | 0.81206600  | 0.16333900  |
| C | 3.77597300  | 2.35518400  | 0.08974400  |
| C | 3.34434700  | 2.76186700  | 1.51535000  |
| H | 1.06367400  | 1.49448300  | 0.52123200  |
| H | 0.69356000  | 2.60092800  | 1.83823100  |
| H | 5.01624800  | 0.55092700  | 0.17640200  |
| H | 3.51951100  | 0.34601000  | -0.72509100 |
| H | 2.76370700  | 3.68634900  | 1.53005400  |
| H | 4.25525800  | 2.93183800  | 2.09520400  |
| C | 5.10040600  | 3.01143800  | -0.30755200 |
| O | 5.87284600  | 3.55840300  | 0.44970200  |
| O | 5.32238800  | 2.85496300  | -1.62359800 |
| C | 2.73561800  | 2.75786700  | -0.96037800 |
| O | 2.14313300  | 2.00456800  | -1.70773500 |
| O | 2.56033100  | 4.08604100  | -0.94659600 |
| C | 6.55861800  | 3.40072700  | -2.12817400 |
| H | 7.41332700  | 2.93070800  | -1.63609300 |
| H | 6.56330000  | 3.17620800  | -3.19454600 |
| H | 6.59189200  | 4.48084000  | -1.96705100 |
| C | 1.59873200  | 4.61721700  | -1.88162100 |
| H | 1.87738600  | 4.35764200  | -2.90547200 |
| H | 0.60242100  | 4.22970800  | -1.66103500 |
| H | 1.62473000  | 5.69789400  | -1.74367300 |
| C | 3.78374100  | -2.14435300 | 1.46251600  |
| C | 3.54964900  | -3.29522800 | 2.24455100  |
| C | 4.44455700  | -2.31929900 | 0.22858900  |
| C | 3.95656700  | -4.55832200 | 1.82288800  |



|    |             |             |             |
|----|-------------|-------------|-------------|
| H  | 3.03361900  | -3.18431500 | 3.19471900  |
| C  | 4.85065100  | -3.58460800 | -0.19261600 |
| H  | 4.63629700  | -1.47391000 | -0.41623700 |
| C  | 4.61128800  | -4.71050300 | 0.59808600  |
| H  | 3.75828000  | -5.42501900 | 2.44717400  |
| H  | 5.35049900  | -3.69176000 | -1.15063500 |
| H  | 4.92538900  | -5.69388000 | 0.26136000  |
| C  | 2.63907900  | 1.57629400  | 3.62825600  |
| H  | 3.67773200  | 1.54253800  | 3.97115600  |
| H  | 2.18296400  | 2.49528400  | 4.01311400  |
| H  | 2.10527400  | 0.73430600  | 4.07553000  |
| Ni | -1.86239200 | 0.07139400  | 1.55094200  |
| P  | -3.32550600 | 0.34596200  | 0.11420000  |
| C  | -2.85601300 | 1.42465000  | -1.31296100 |
| C  | -3.77734300 | 2.17394400  | -2.05937400 |
| C  | -1.49974700 | 1.46768900  | -1.66953400 |
| C  | -3.35016600 | 2.93817000  | -3.14827800 |
| H  | -4.82945200 | 2.16091000  | -1.79317500 |
| C  | -1.07366700 | 2.21755900  | -2.76651400 |
| H  | -0.78324800 | 0.90441100  | -1.08052900 |
| C  | -2.00039600 | 2.95644500  | -3.50777700 |
| H  | -4.07328900 | 3.51661900  | -3.71672300 |
| H  | -0.01914500 | 2.23251100  | -3.02048000 |
| C  | -4.94502900 | 1.08181700  | 0.62524000  |
| C  | -6.18919600 | 0.64437300  | 0.15052100  |
| C  | -4.90605100 | 2.13622400  | 1.55184800  |
| C  | -7.36899700 | 1.24817300  | 0.59432000  |
| H  | -6.23993500 | -0.16899500 | -0.56558200 |
| C  | -6.08150200 | 2.75063100  | 1.98170000  |
| H  | -3.94363200 | 2.46338300  | 1.93817100  |
| C  | -7.31825300 | 2.30444400  | 1.50550100  |
| H  | -8.32714300 | 0.89437000  | 0.22374900  |
| H  | -6.03489600 | 3.56859600  | 2.69539500  |
| C  | -3.85827600 | -1.20996300 | -0.73750200 |
| C  | -4.18531600 | -1.28788400 | -2.09792500 |
| C  | -3.90154200 | -2.37926800 | 0.03748100  |
| C  | -4.54792000 | -2.51026300 | -2.67005200 |
| H  | -4.14891100 | -0.39693400 | -2.71549300 |
| C  | -4.27521000 | -3.59750100 | -0.52894200 |
| H  | -3.61878100 | -2.32521800 | 1.08539000  |
| C  | -4.59549200 | -3.66658200 | -1.88802400 |
| H  | -4.79114800 | -2.55850700 | -3.72783100 |
| H  | -4.30231900 | -4.49404200 | 0.08406500  |
| H  | -8.23603600 | 2.77297900  | 1.84915900  |

|   |             |             |             |
|---|-------------|-------------|-------------|
| H | -4.87349100 | -4.61650500 | -2.33549700 |
| H | -1.67159100 | 3.54947800  | -4.35660100 |
| C | 0.18010700  | 0.56961100  | 2.22305700  |
| C | 0.16113300  | -0.77035900 | 1.74898700  |
| C | -0.61178000 | -1.75821200 | 2.39916300  |
| C | -1.41687600 | -1.41314000 | 3.50202500  |
| C | -1.44434500 | -0.07937800 | 3.95763300  |
| C | -0.64787500 | 0.89994900  | 3.32792200  |
| H | 0.77063800  | -1.04053400 | 0.89859700  |
| H | -0.60051700 | -2.77723100 | 2.02788400  |
| H | -2.03073000 | -2.16594600 | 3.98594400  |
| H | -2.07937200 | 0.19805700  | 4.79269600  |
| H | -0.65837800 | 1.92136200  | 3.69424200  |

**Ni<sup>0</sup>(cod)<sub>2</sub>PPh<sub>3</sub>**

|    |             |             |             |
|----|-------------|-------------|-------------|
| C  | -2.78654400 | -2.43939700 | 0.19623500  |
| C  | -2.50885700 | -3.71737300 | 1.03577300  |
| H  | -2.90611600 | -1.61053400 | 0.90750700  |
| H  | -1.74066700 | -3.50591100 | 1.78182400  |
| H  | -3.42150100 | -3.94287500 | 1.60102600  |
| C  | 0.36712800  | -3.01422200 | 0.26205100  |
| H  | -0.04872200 | -2.78562100 | 1.24312100  |
| H  | 1.40259300  | -2.65931600 | 0.28811700  |
| C  | 0.41489500  | -4.54187800 | 0.03299900  |
| H  | 1.04566400  | -4.73016000 | -0.84636900 |
| H  | 0.95001900  | -5.01296400 | 0.87283400  |
| C  | -0.38393200 | -2.29107500 | -0.83645700 |
| H  | 0.12045300  | -2.36359000 | -1.80367200 |
| C  | -1.77907500 | -2.09581200 | -0.89871600 |
| H  | -2.21022300 | -2.05832300 | -1.89852700 |
| C  | -0.89529800 | -5.26158000 | -0.19086100 |
| H  | -0.80372600 | -6.18377600 | -0.76648800 |
| C  | -2.12436500 | -4.92637800 | 0.22298700  |
| H  | -2.94584200 | -5.58079400 | -0.07035900 |
| H  | -3.76505200 | -2.55691700 | -0.28188100 |
| Ni | -0.78253000 | -0.33119500 | -0.64042500 |
| C  | -2.19736500 | 2.04303000  | 0.94395000  |
| C  | -3.67142700 | 1.88225300  | 1.36958000  |
| H  | -1.57427700 | 1.45065400  | 1.62548500  |
| H  | -3.96156300 | 0.83142200  | 1.31582200  |
| H  | -3.73737600 | 2.15883900  | 2.42808600  |
| C  | -3.92680500 | 0.35204600  | -1.28428300 |
| H  | -4.08066900 | -0.11957500 | -0.31702800 |
| H  | -4.02205700 | -0.44557300 | -2.02831200 |

|   |             |             |             |
|---|-------------|-------------|-------------|
| C | -5.04591700 | 1.37746500  | -1.55424000 |
| H | -4.92357300 | 1.77225100  | -2.57310600 |
| H | -6.01103700 | 0.84749300  | -1.57060900 |
| C | -2.54627700 | 0.95482400  | -1.40660800 |
| H | -2.17778200 | 1.00671900  | -2.43284300 |
| C | -1.84921400 | 1.71192400  | -0.49567200 |
| H | -1.02847400 | 2.29915500  | -0.89566300 |
| C | -5.16105700 | 2.55388400  | -0.61921700 |
| H | -5.80684500 | 3.34615900  | -1.00115800 |
| C | -4.61410500 | 2.76471700  | 0.58530600  |
| H | -4.84292800 | 3.71897400  | 1.06046500  |
| H | -1.90360600 | 3.08664600  | 1.11563500  |
| P | 1.18982300  | 0.46478700  | -0.07426200 |
| C | 1.65997300  | 2.19361300  | -0.53909100 |
| C | 1.15311100  | 3.26752700  | 0.21319000  |
| C | 2.40824800  | 2.47661900  | -1.69061800 |
| C | 1.39699100  | 4.58574400  | -0.17097700 |
| H | 0.57082600  | 3.07399000  | 1.10801300  |
| C | 2.64675200  | 3.79741600  | -2.07786200 |
| H | 2.81717800  | 1.66762300  | -2.28626500 |
| C | 2.14437200  | 4.85653600  | -1.32009700 |
| H | 1.00231900  | 5.40116300  | 0.42875500  |
| H | 3.23338900  | 3.99587700  | -2.97055300 |
| H | 2.33339600  | 5.88299300  | -1.62047900 |
| C | 2.60933100  | -0.50412000 | -0.74463500 |
| C | 3.74890500  | -0.84900300 | -0.00568100 |
| C | 2.50916700  | -0.93970000 | -2.07665400 |
| C | 4.76559700  | -1.61027400 | -0.58700500 |
| H | 3.84327600  | -0.53798400 | 1.02829600  |
| C | 3.53194000  | -1.68605500 | -2.66177500 |
| H | 1.61901600  | -0.69891400 | -2.65039800 |
| C | 4.66296500  | -2.02676600 | -1.91551500 |
| H | 5.63945800  | -1.87606900 | 0.00124400  |
| H | 3.44053600  | -2.00966400 | -3.69469300 |
| H | 5.45555800  | -2.61789200 | -2.36501300 |
| C | 1.45166700  | 0.48810700  | 1.74721700  |
| C | 0.52428900  | -0.19307100 | 2.54885000  |
| C | 2.51319900  | 1.16855100  | 2.36548700  |
| C | 0.66053900  | -0.21071000 | 3.93848100  |
| H | -0.30941900 | -0.69893100 | 2.07185200  |
| C | 2.65114800  | 1.14997000  | 3.75340800  |
| H | 3.22688300  | 1.71895700  | 1.76100600  |
| C | 1.72657100  | 0.45858000  | 4.54217000  |
| H | -0.06684300 | -0.74098200 | 4.54643200  |

|   |            |            |            |
|---|------------|------------|------------|
| H | 3.47765800 | 1.67777800 | 4.22047100 |
| H | 1.83429100 | 0.44897400 | 5.62292200 |

## 12. Chiral HPLC charts and NMR Spectra

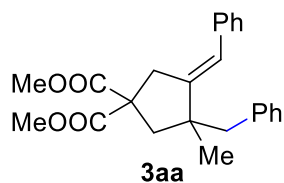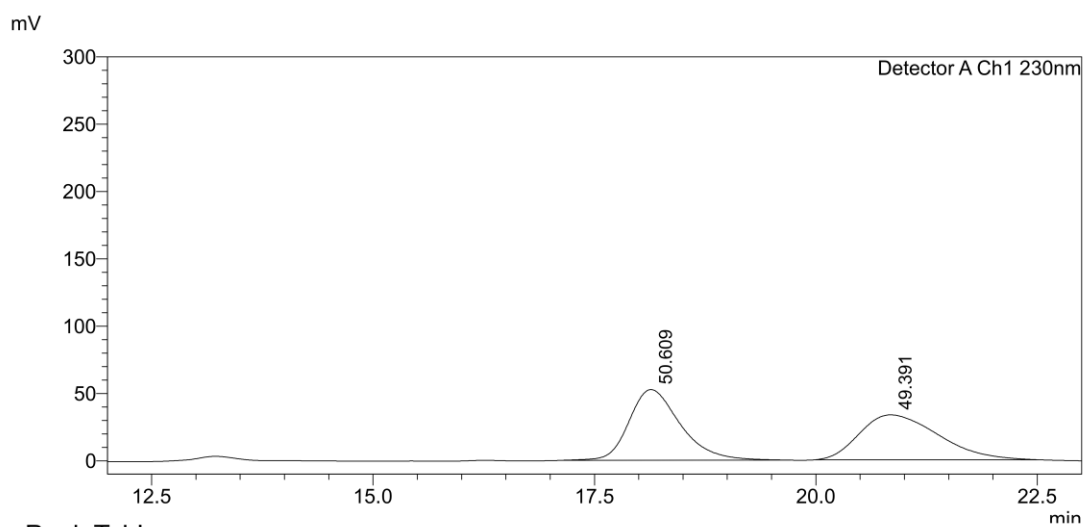

<Peak Table>

Detector A Ch1 230nm

| Peak# | Ret. Time | Area    | Height | Area%   |
|-------|-----------|---------|--------|---------|
| 1     | 18.138    | 2116795 | 52477  | 50.609  |
| 2     | 20.844    | 2065859 | 33385  | 49.391  |
| 总计    |           | 4182654 | 85862  | 100.000 |

Supplementary Figure 1. HPLC spectrum of 3aa-rac

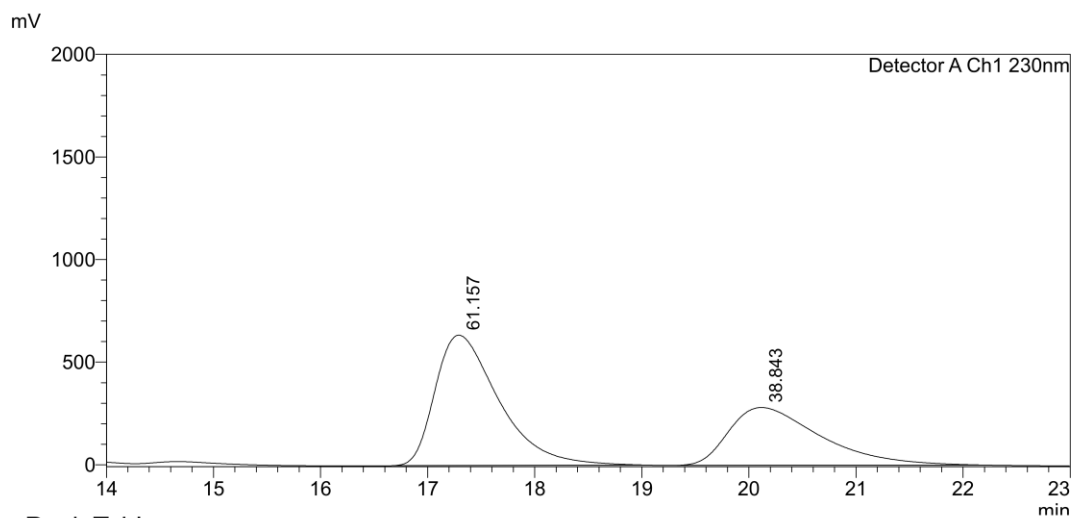

<Peak Table>

Detector A Ch1 230nm

| Peak# | Ret. Time | Area     | Height | Area%   |
|-------|-----------|----------|--------|---------|
| 1     | 17.291    | 26204556 | 634948 | 61.157  |
| 2     | 20.117    | 16643598 | 281129 | 38.843  |
| 总计    |           | 42848154 | 916077 | 100.000 |

Supplementary Figure 2. HPLC spectrum of 3aa

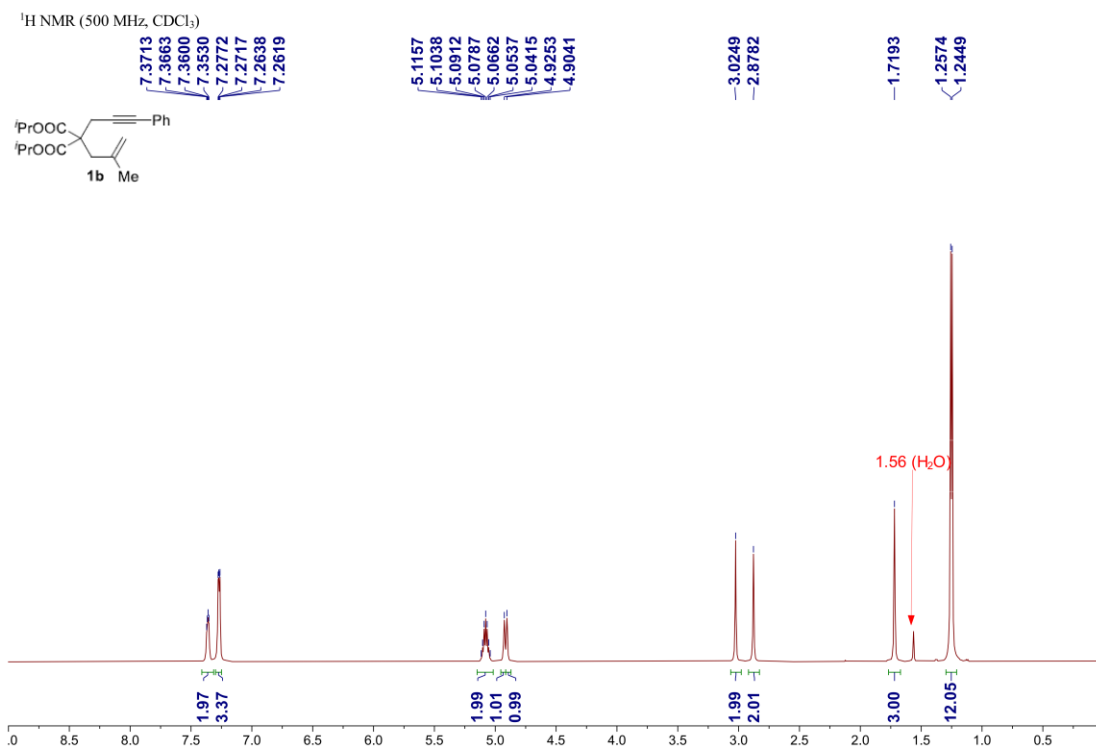

<sup>13</sup>C NMR (126 MHz, CDCl<sub>3</sub>)

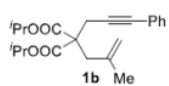

— 169.7978

— 140.2885

— 131.5721

— 128.1645

— 127.8342

— 123.4116

— 116.1146

— 84.9751

— 83.5457

— 77.2533

— 77.0000

— 76.7459

— 69.1063

— 56.5849

— 39.4433

— 23.4388

— 23.4121

— 21.5750

— 21.5413

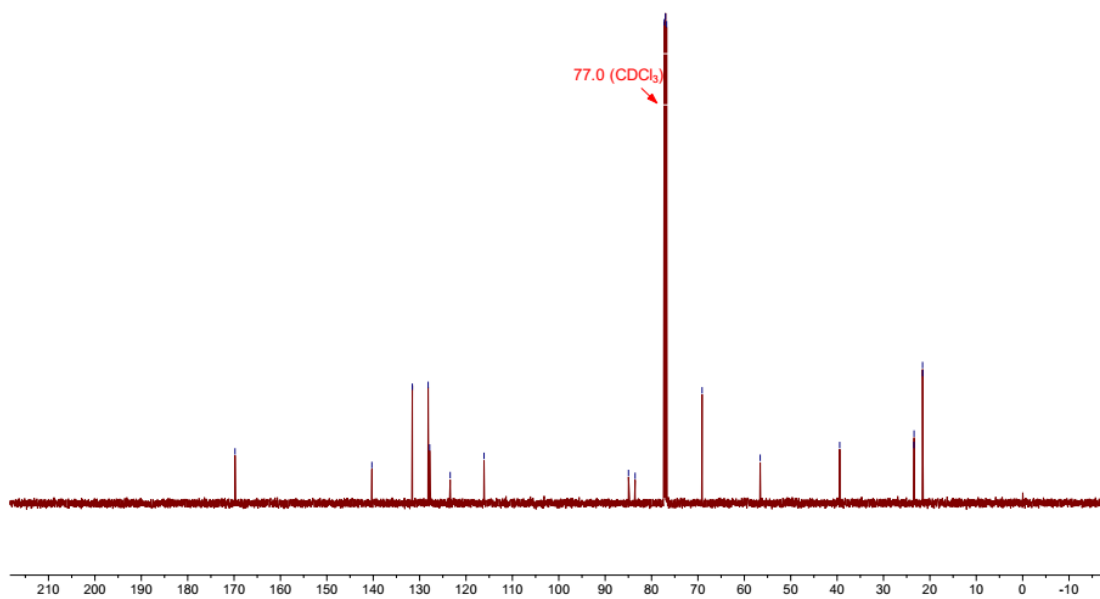

<sup>1</sup>H NMR (600 MHz, CDCl<sub>3</sub>)

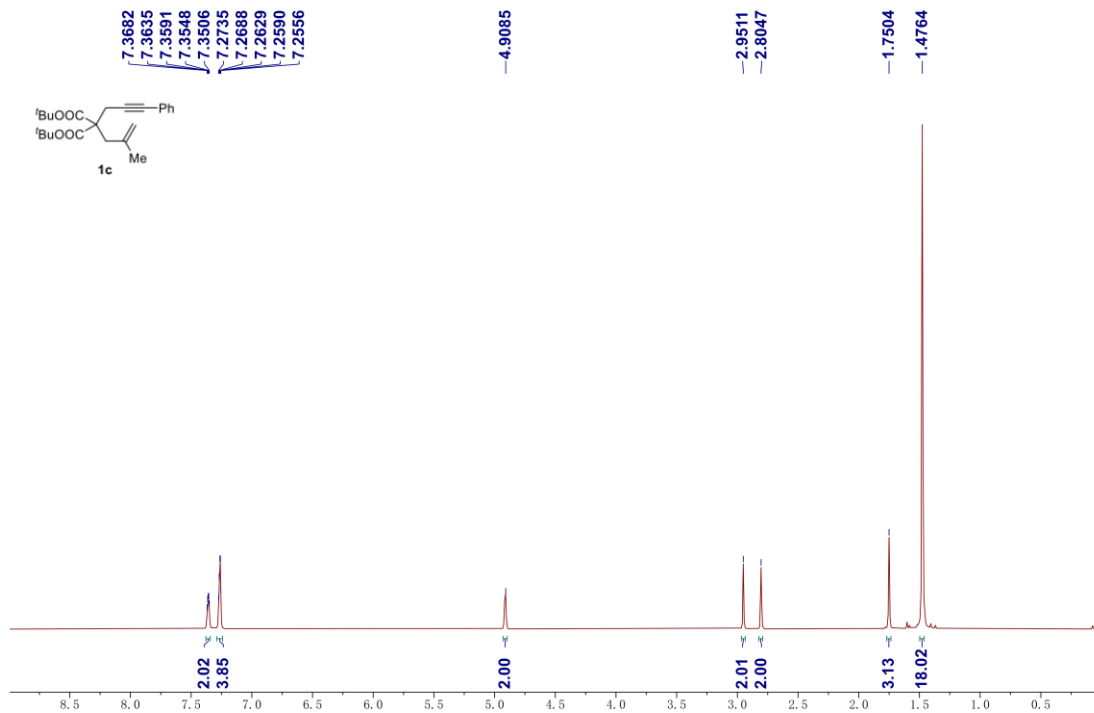

<sup>13</sup>C NMR (151 MHz, CDCl<sub>3</sub>)

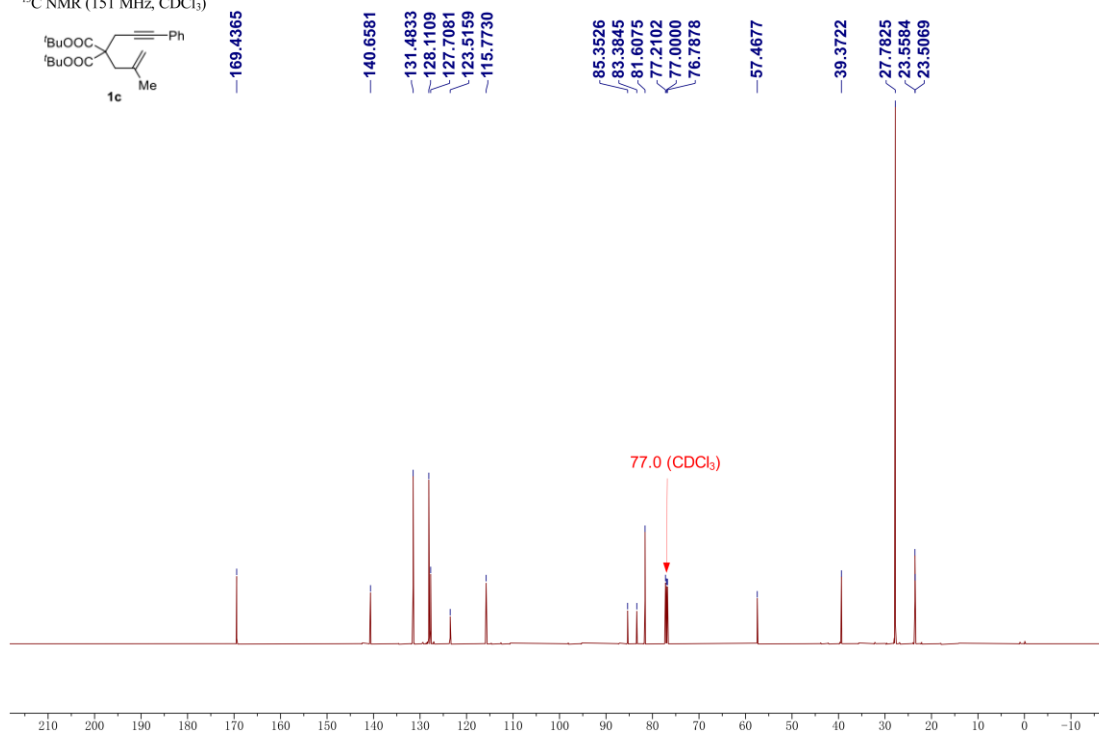

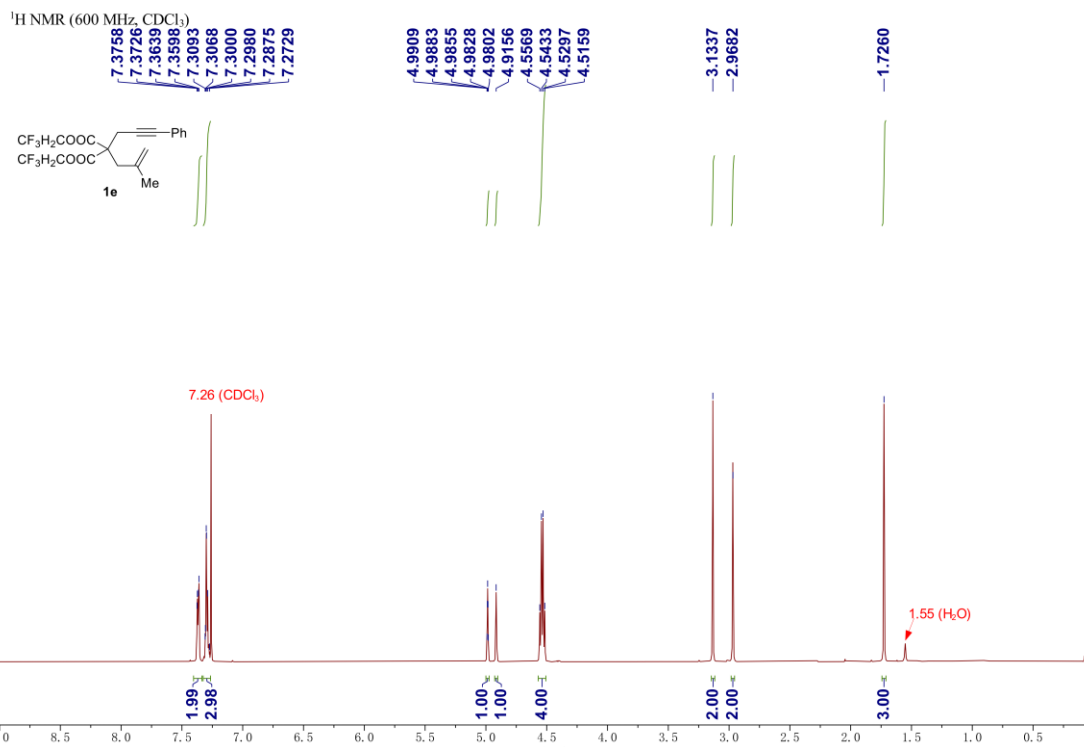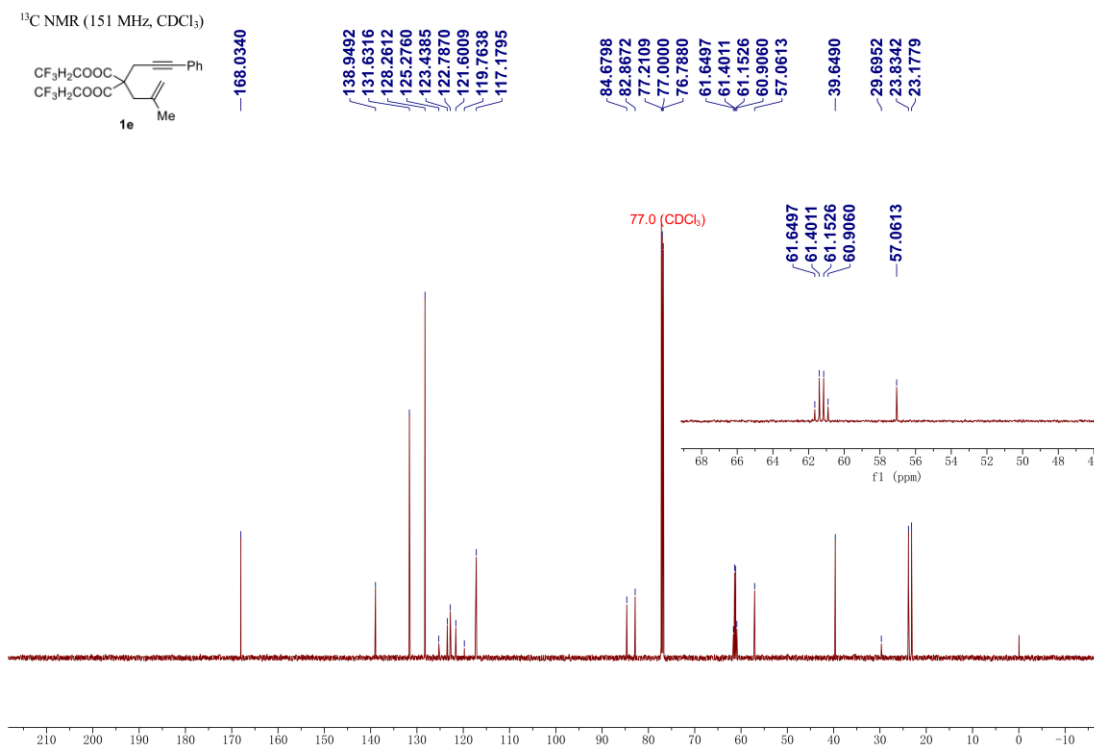



<sup>19</sup>F NMR (565 MHz, CDCl<sub>3</sub>)

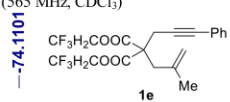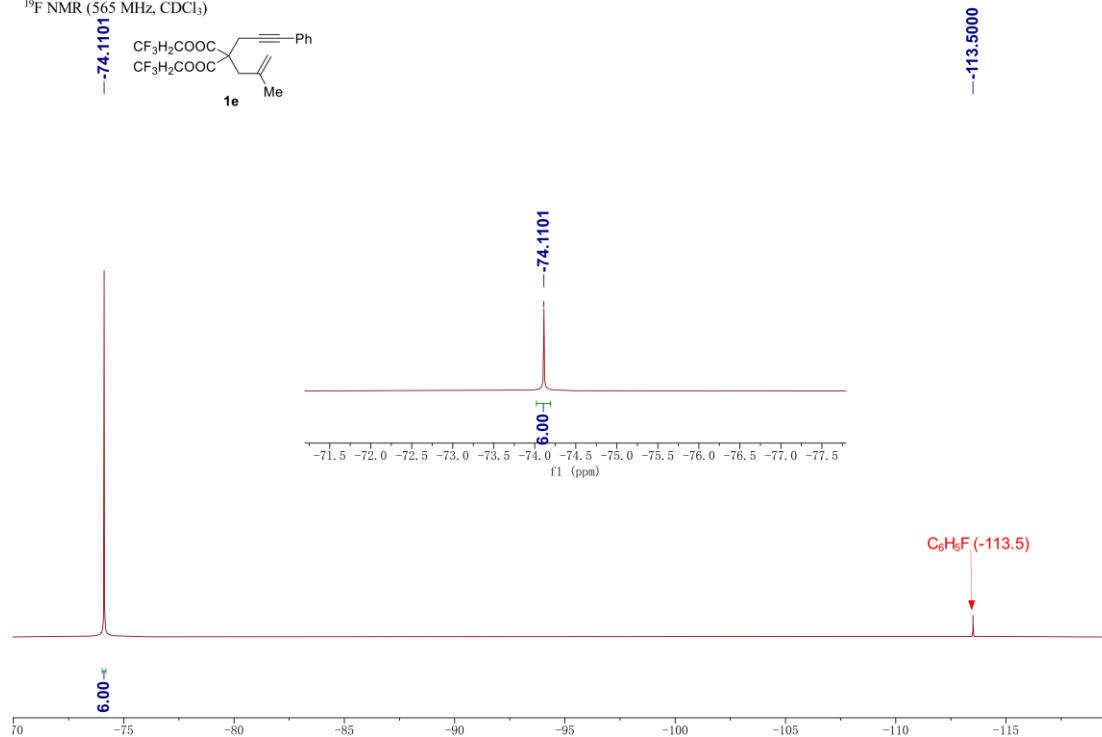

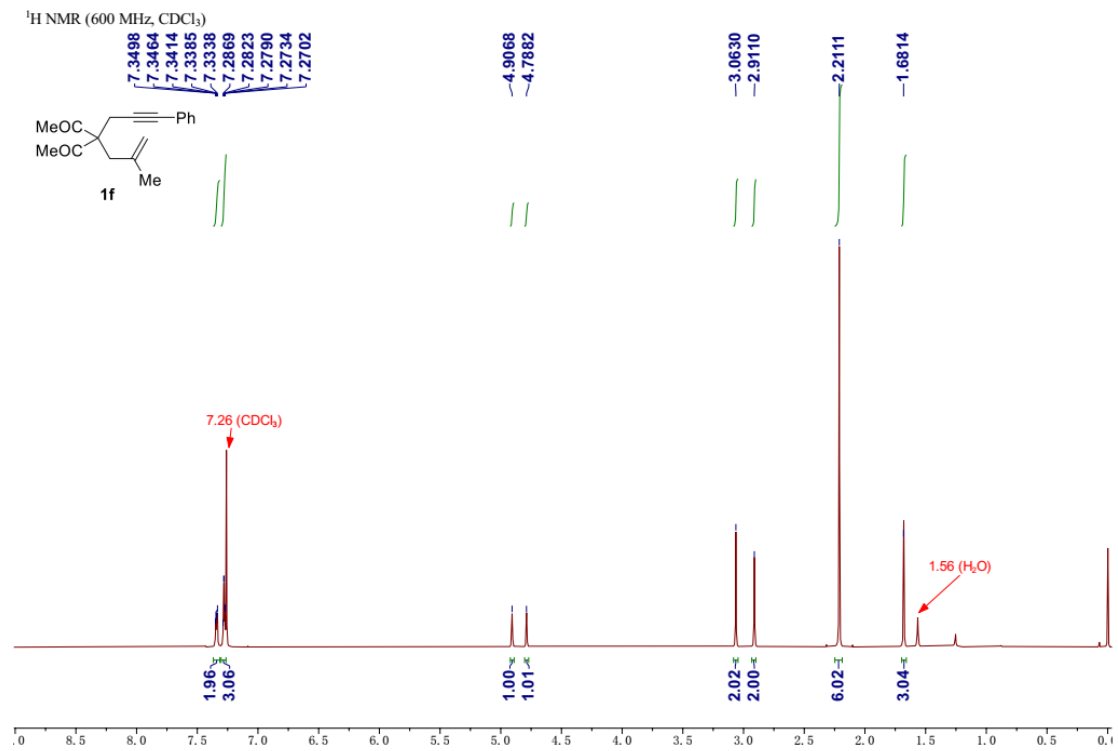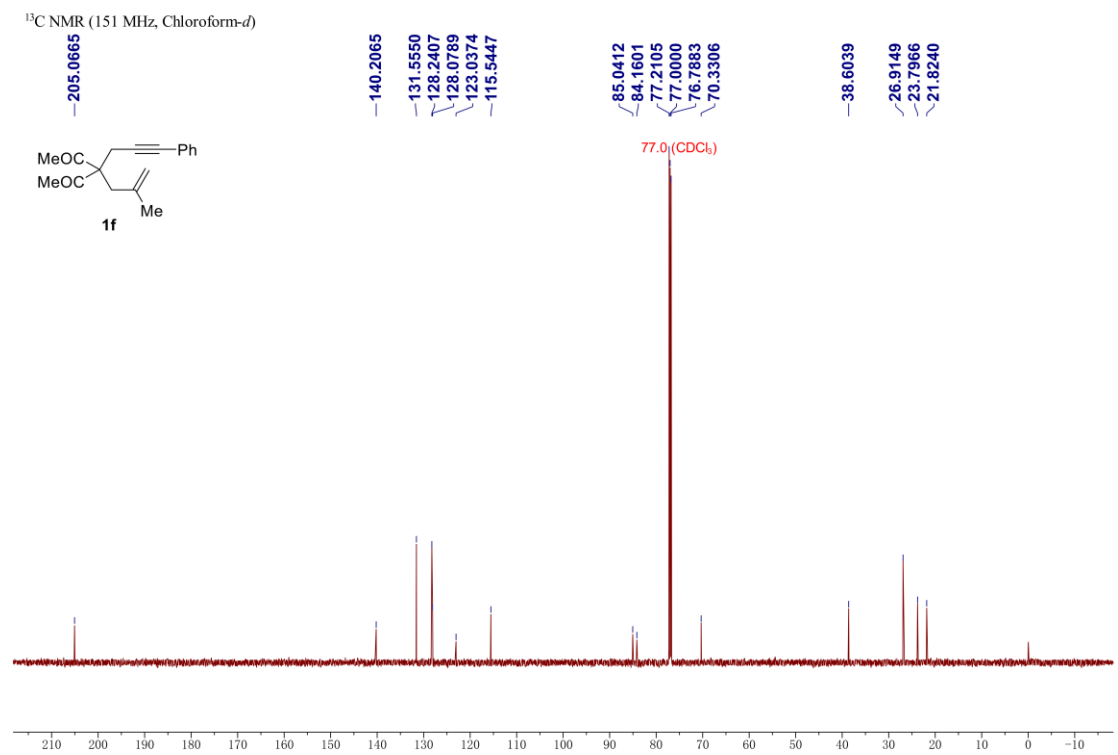

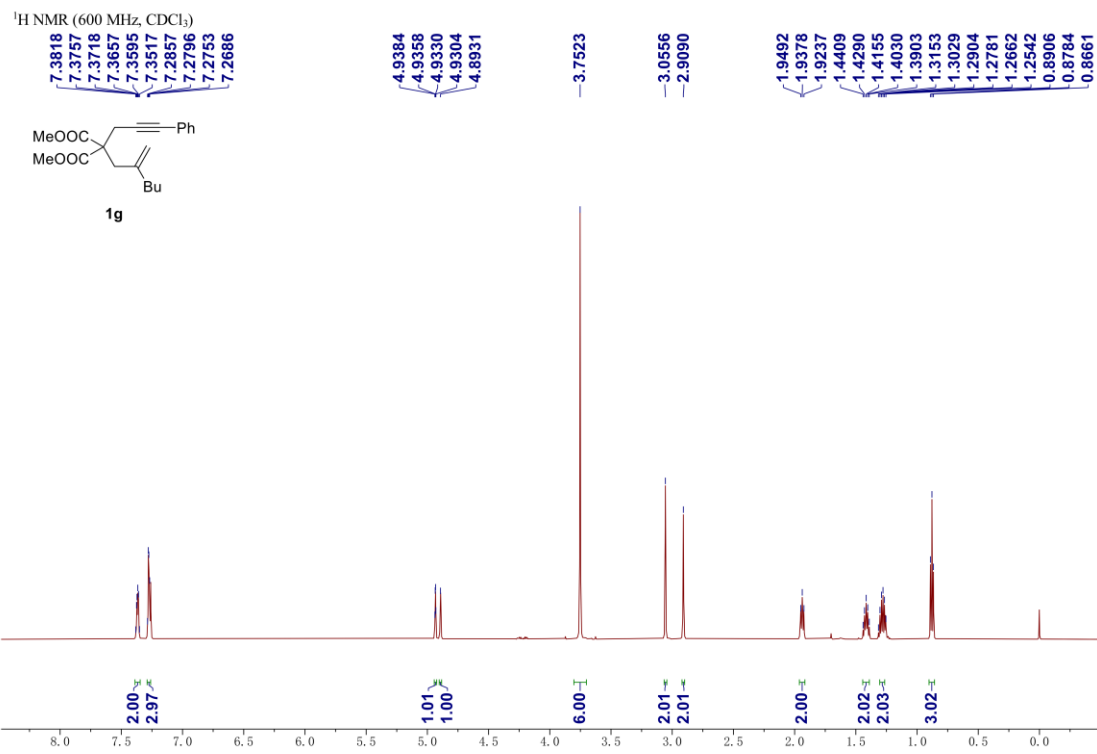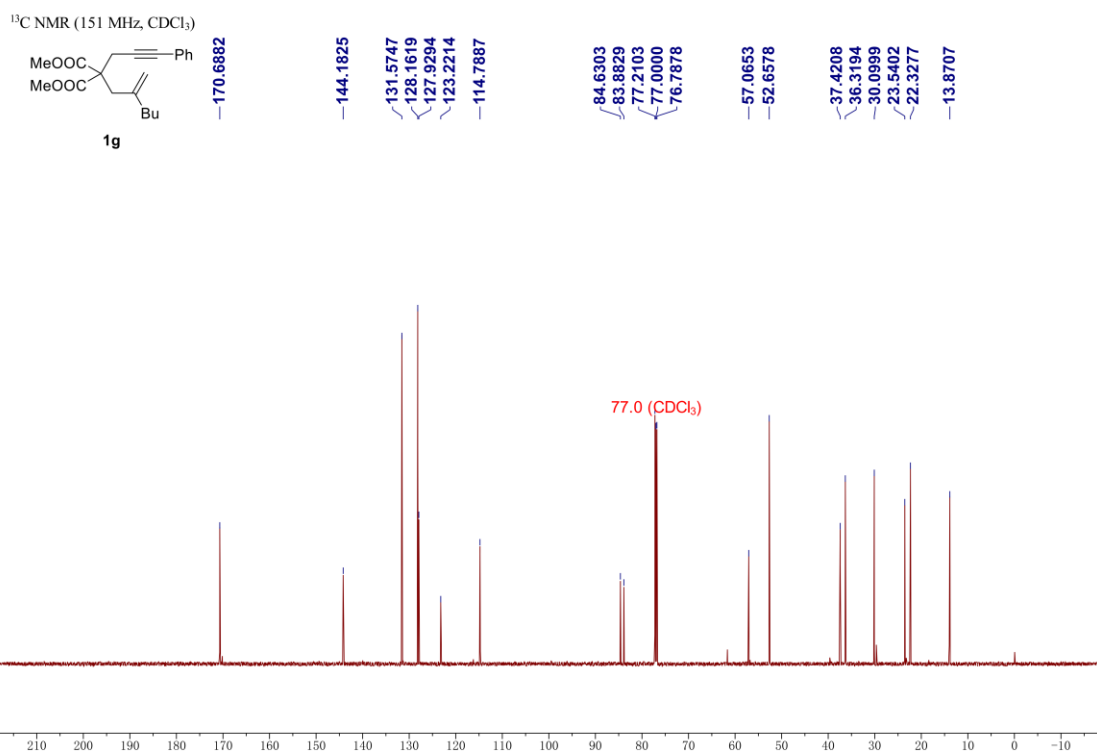

<sup>1</sup>H NMR (600 MHz, CDCl<sub>3</sub>)

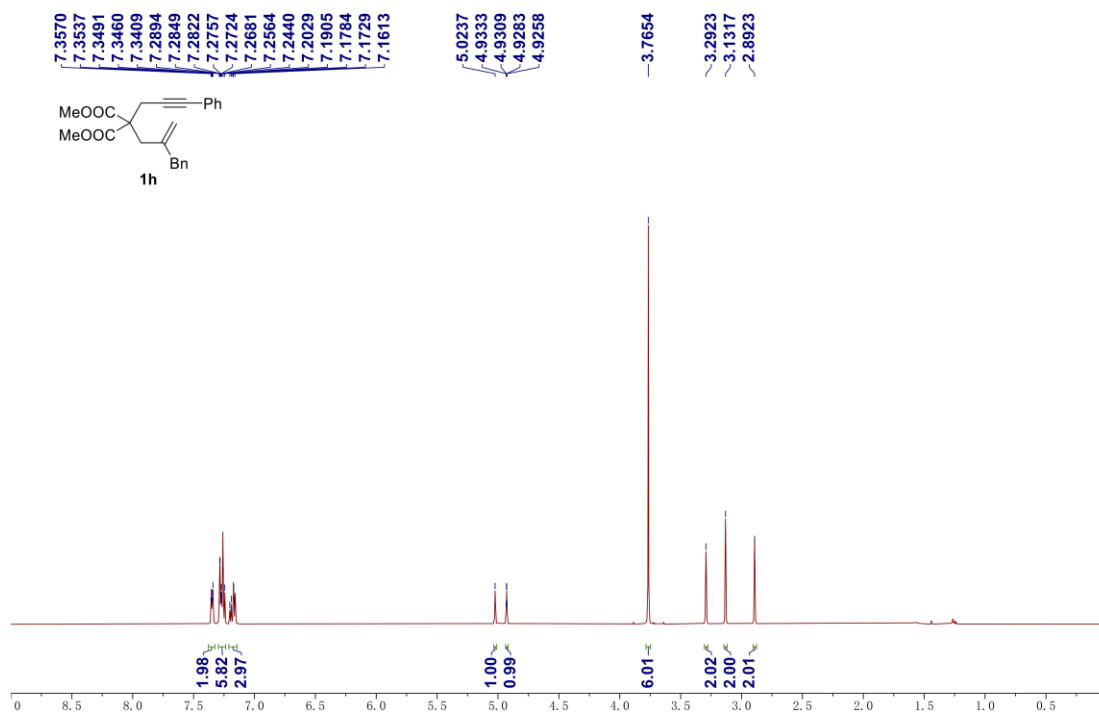

<sup>13</sup>C NMR (151 MHz, CDCl<sub>3</sub>)

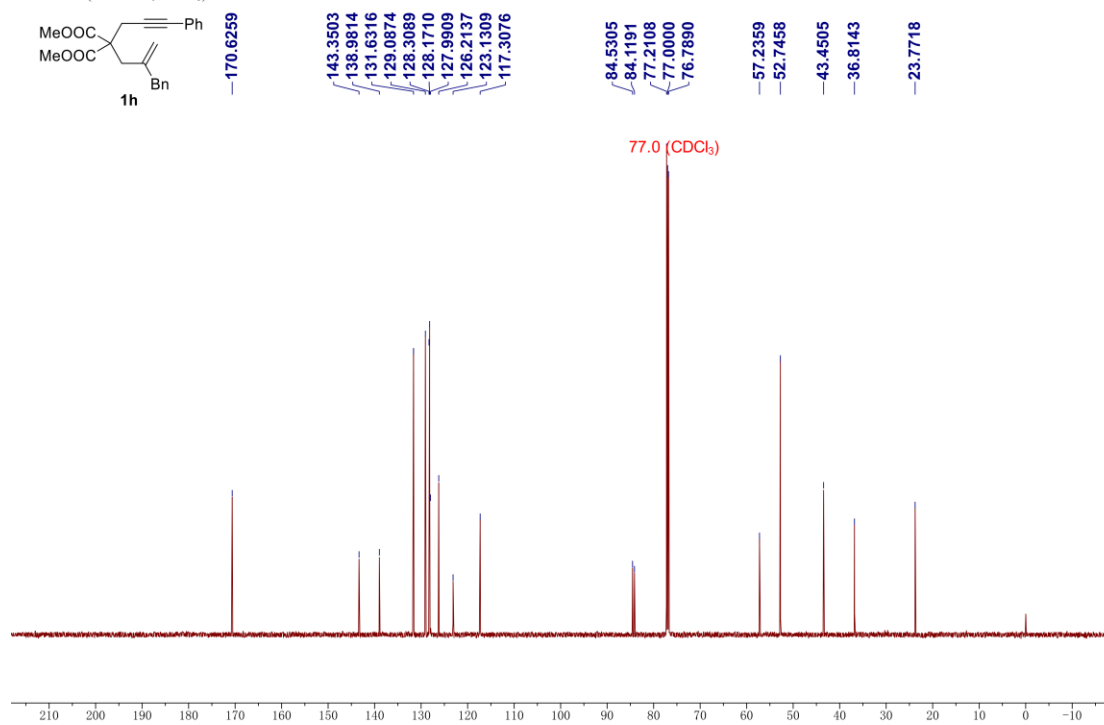

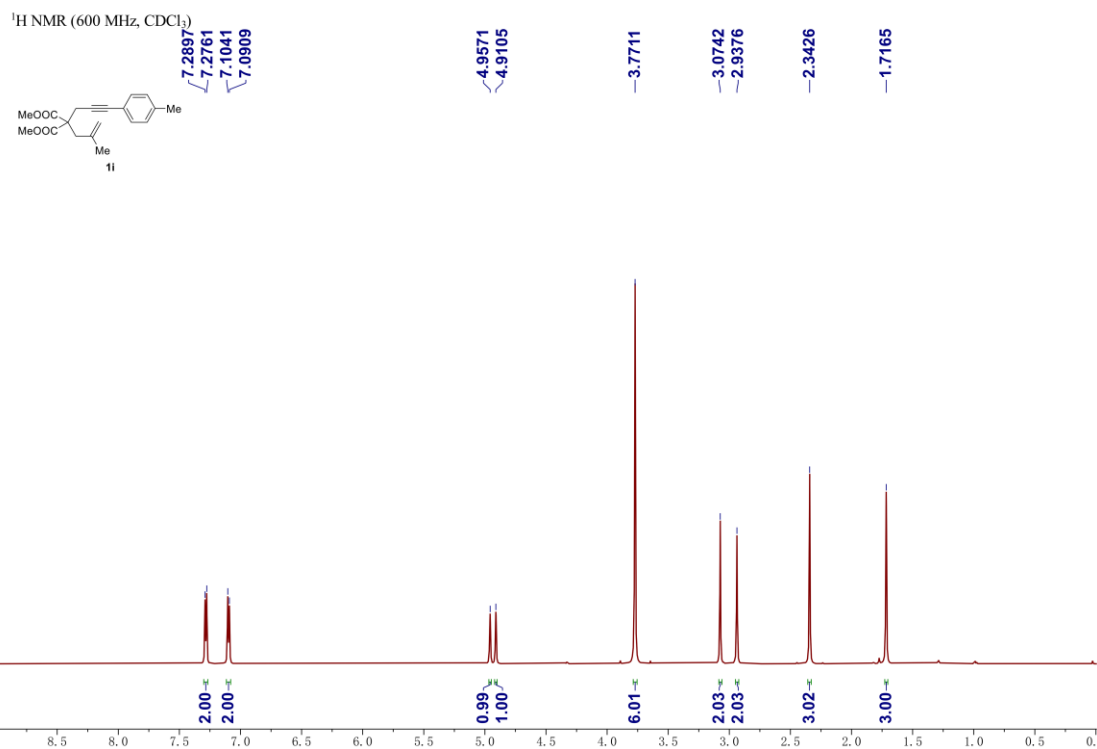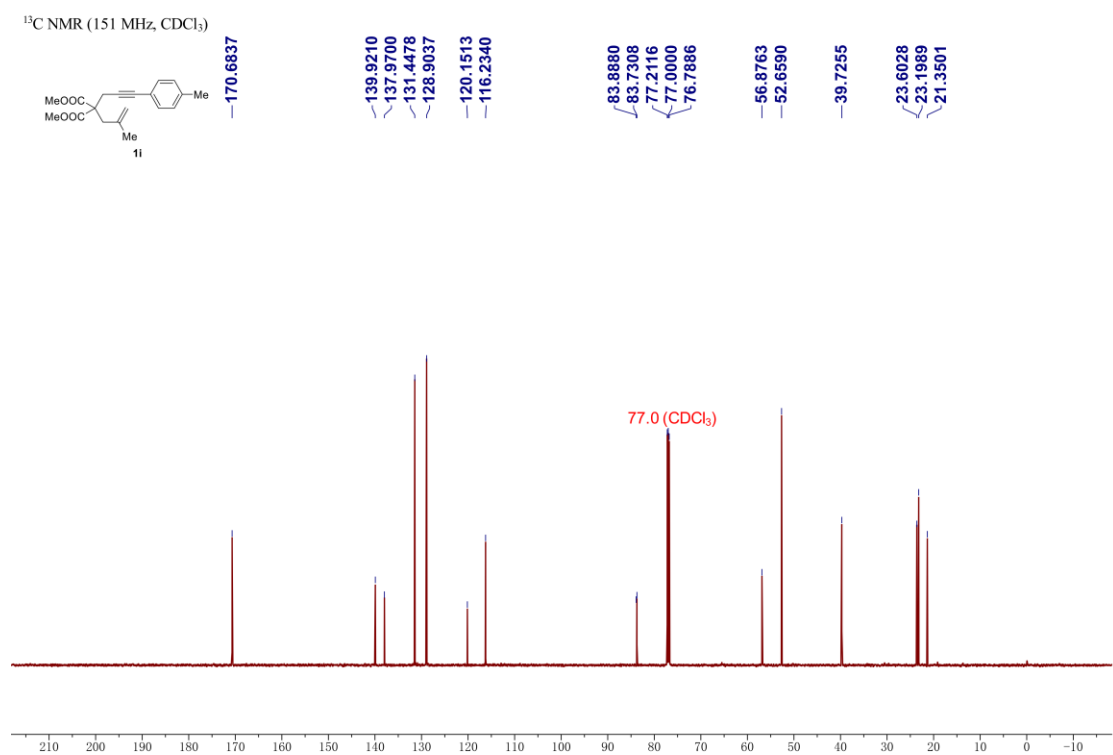

<sup>1</sup>H NMR (600 MHz, CDCl<sub>3</sub>)

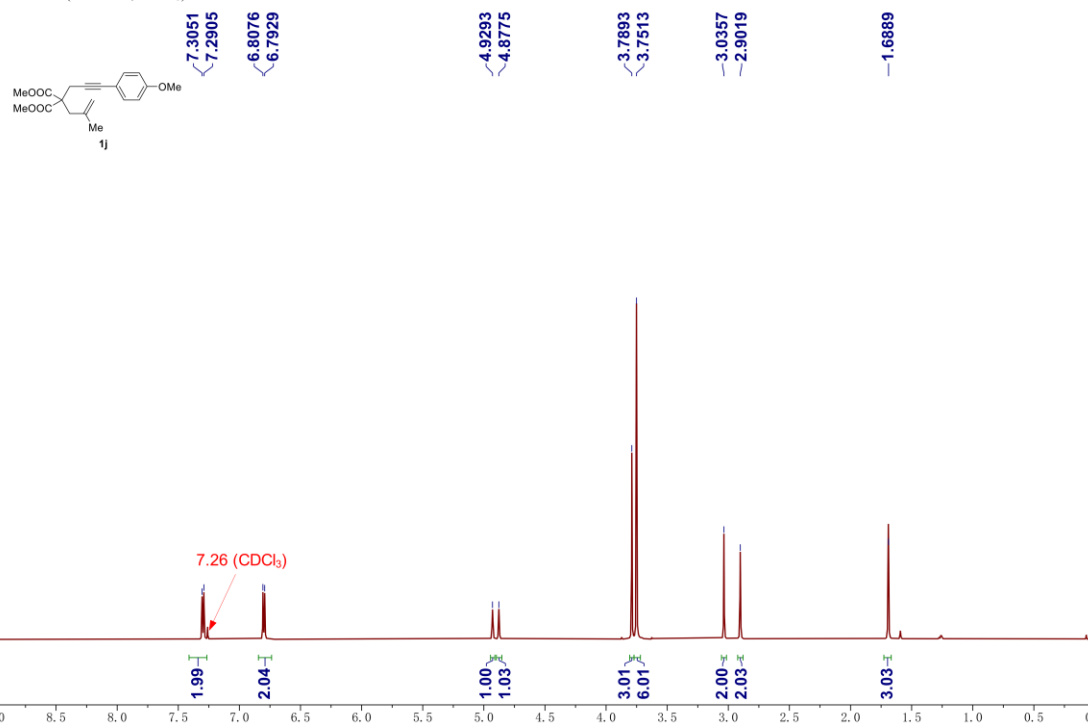

<sup>13</sup>C NMR (151 MHz, CDCl<sub>3</sub>)

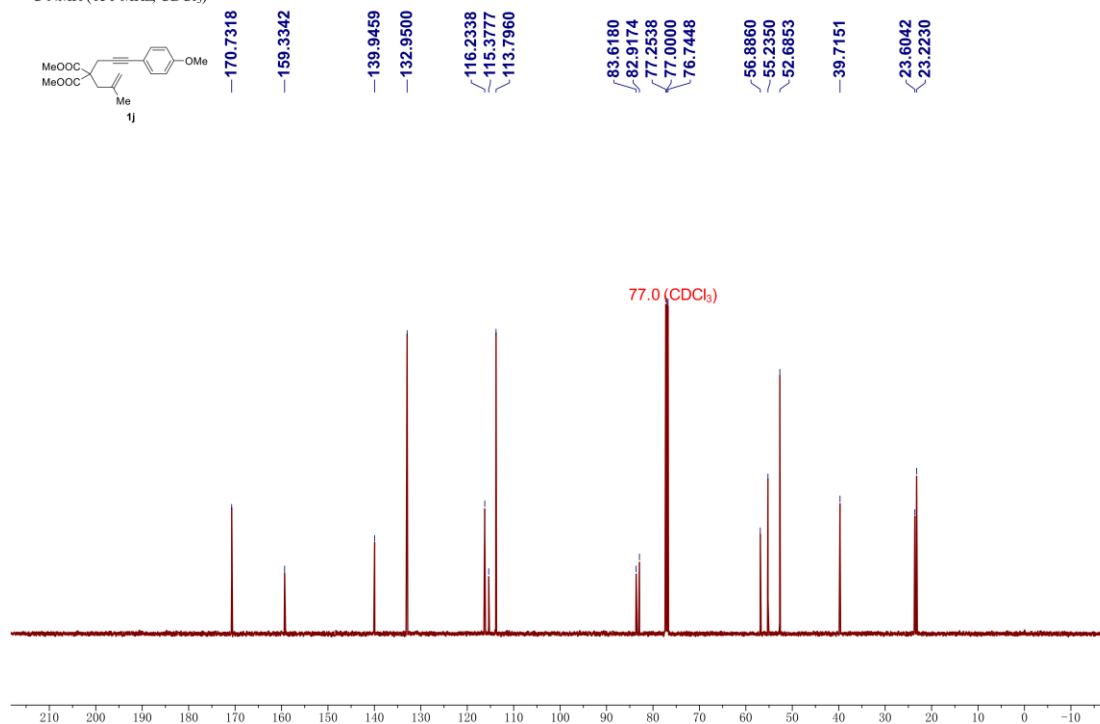

<sup>1</sup>H NMR (600 MHz, CDCl<sub>3</sub>)

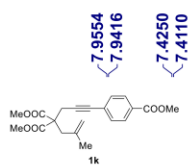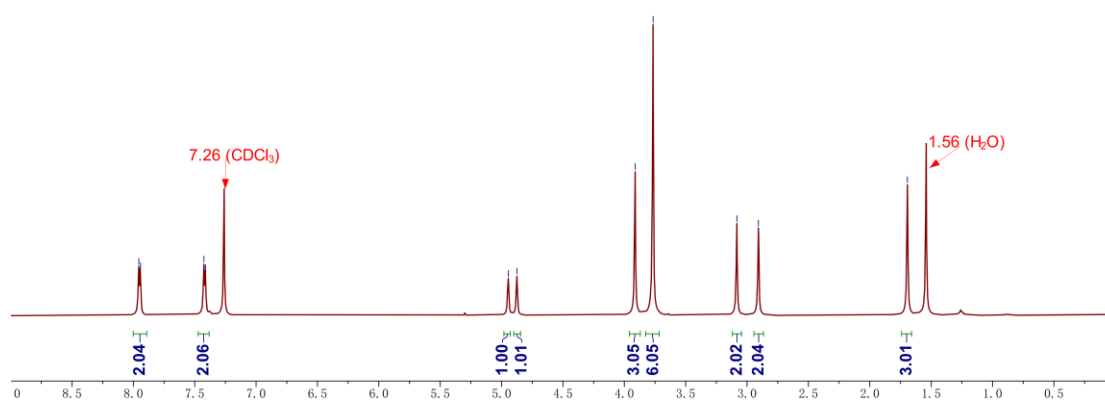

<sup>13</sup>C NMR (151 MHz, CDCl<sub>3</sub>)

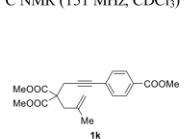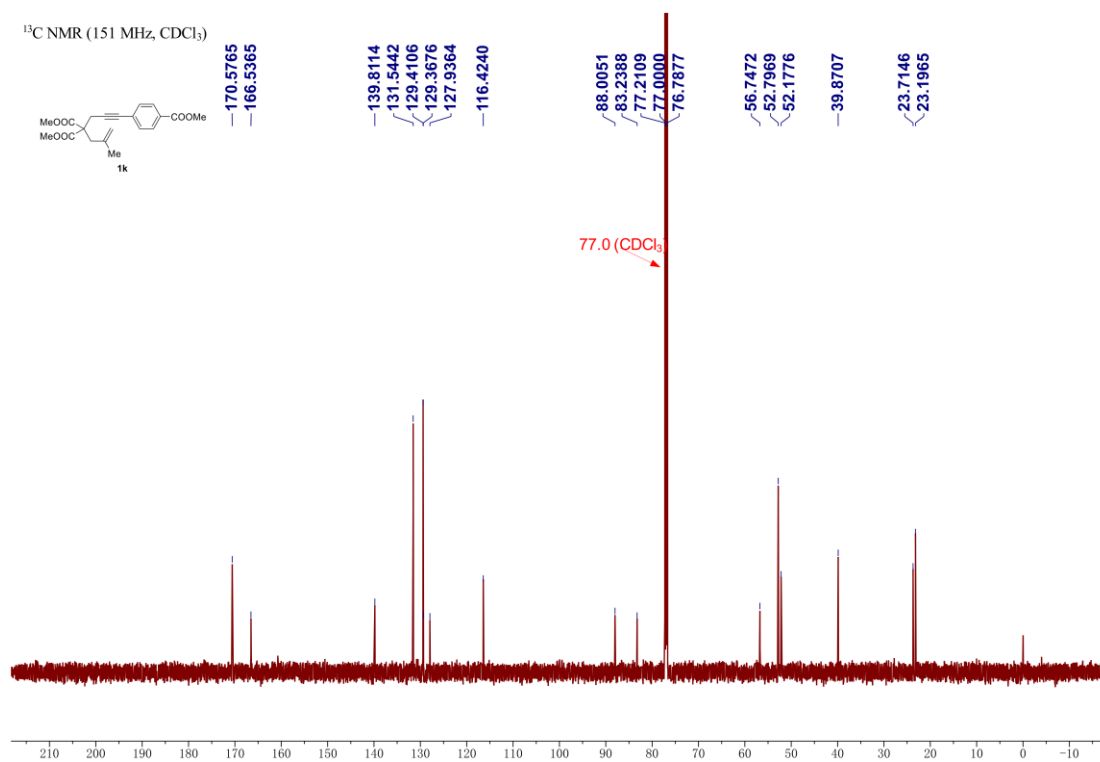

<sup>1</sup>H NMR (600 MHz, CDCl<sub>3</sub>)

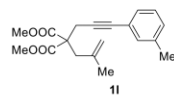

7.1902  
7.1709  
7.1585  
7.1460  
7.0943  
7.0829

4.9404  
4.8934

3.7564

3.0573  
2.9190

2.3059

1.6991

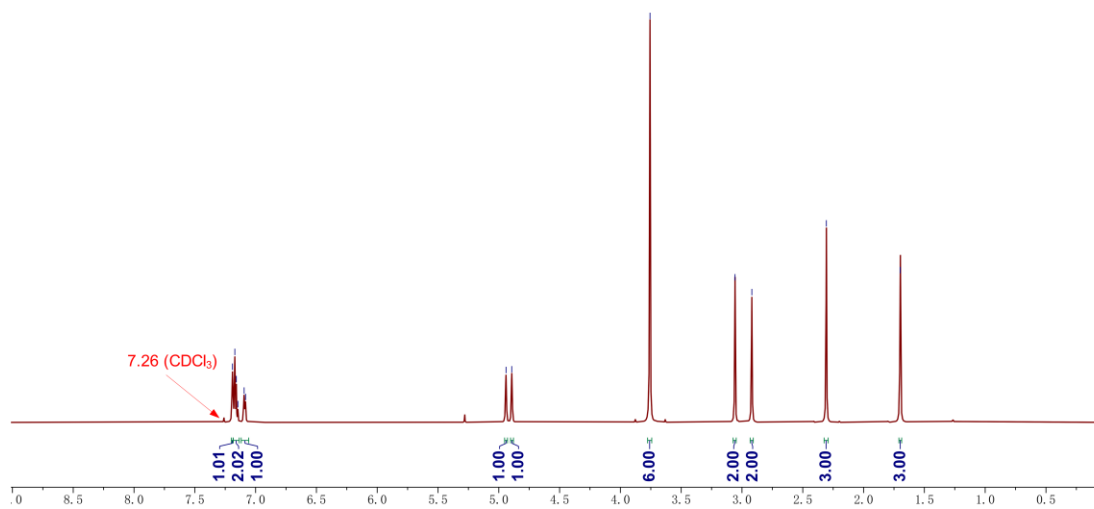

<sup>13</sup>C NMR (151 MHz, CDCl<sub>3</sub>)

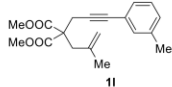

170.6530

139.8957  
137.8307  
132.1116  
128.8187  
128.6576  
128.0596  
123.0152  
116.2640

84.0921  
83.9693  
77.2119  
77.0000  
76.7880

56.8367  
52.6690

39.7257

23.5789  
23.1954  
21.1133

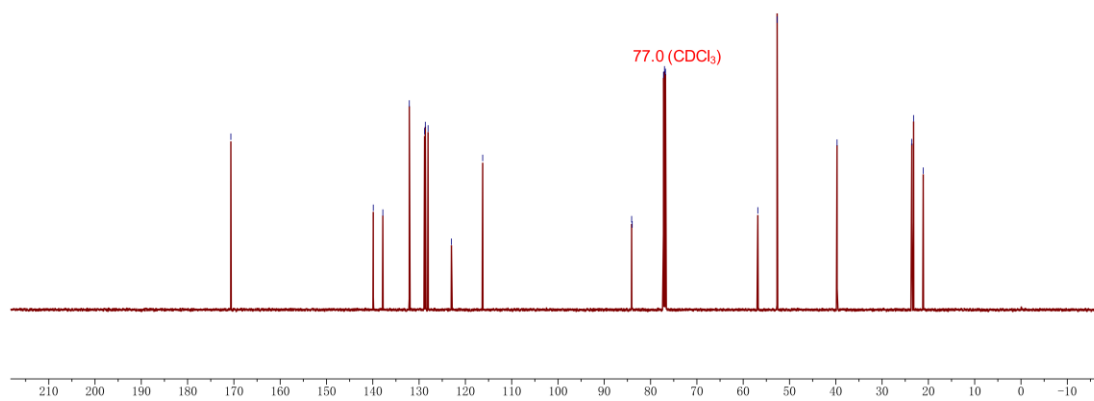



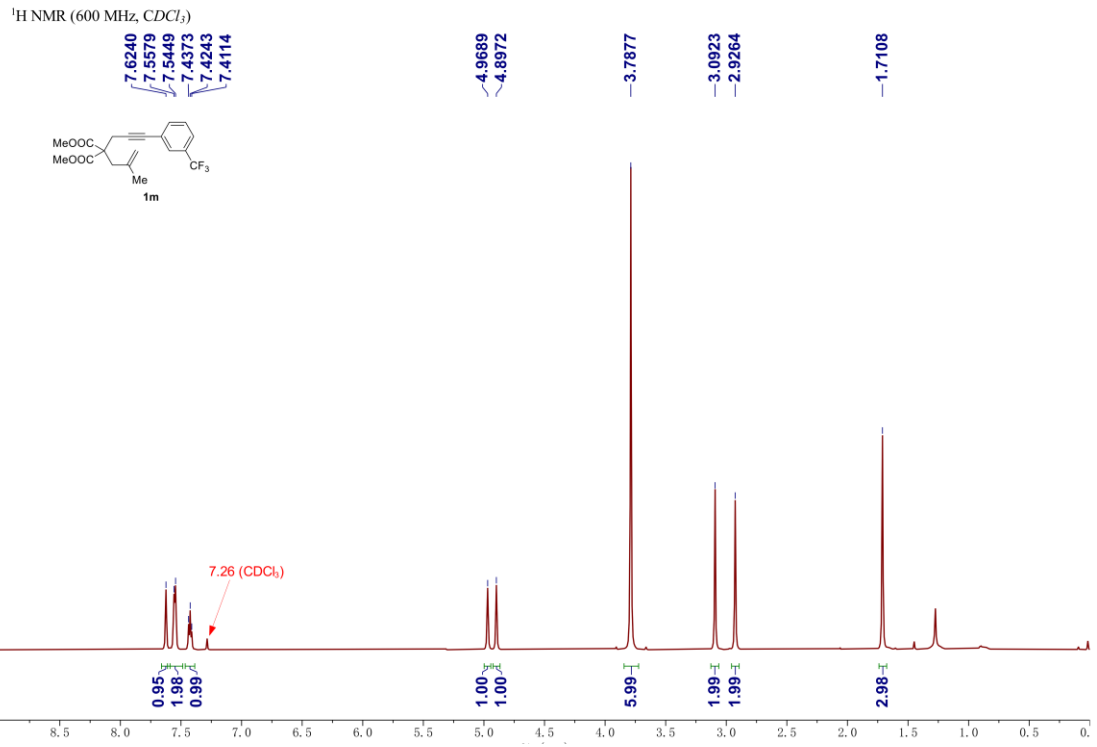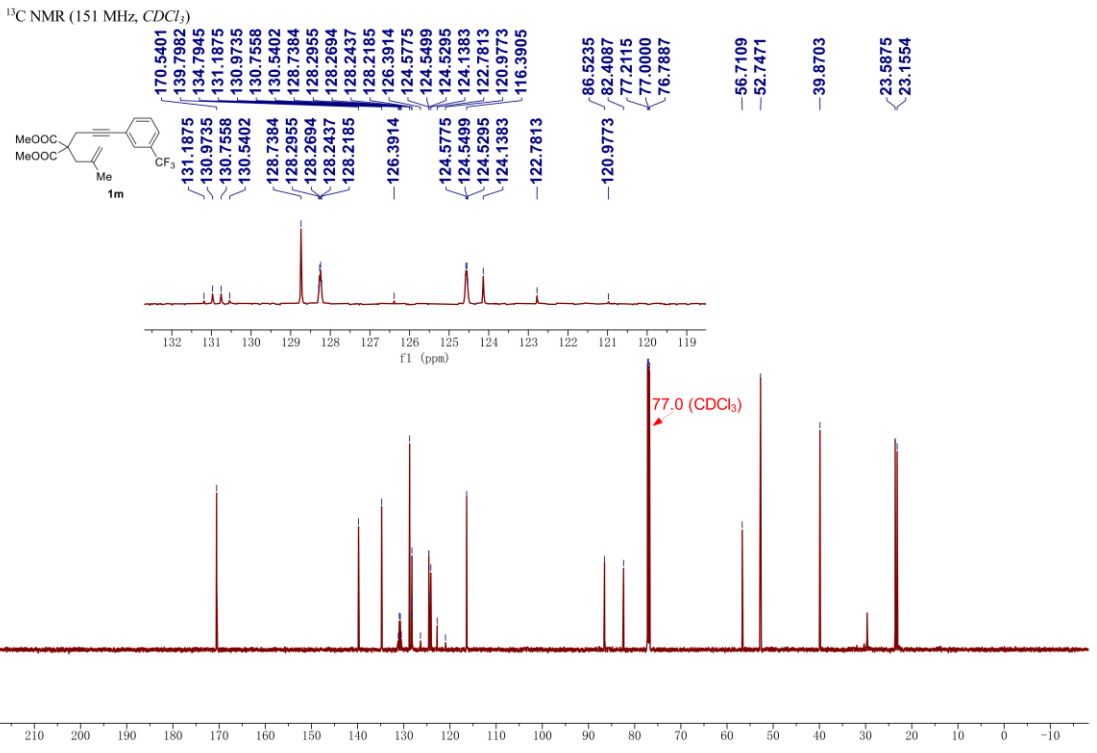

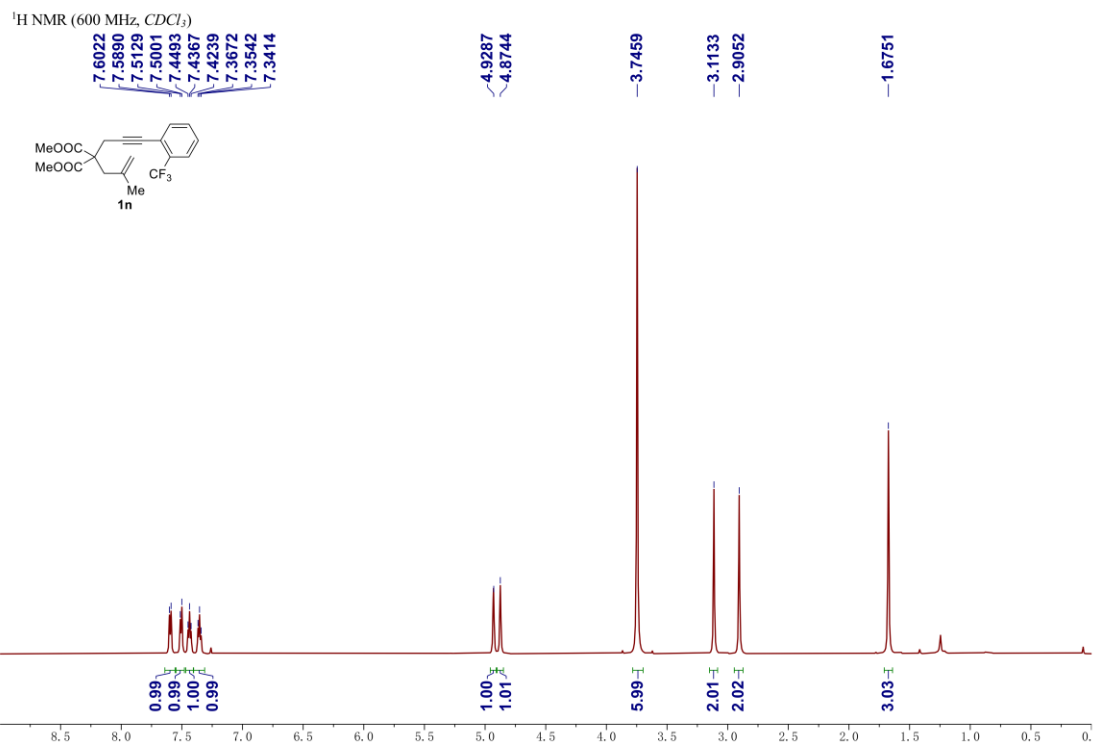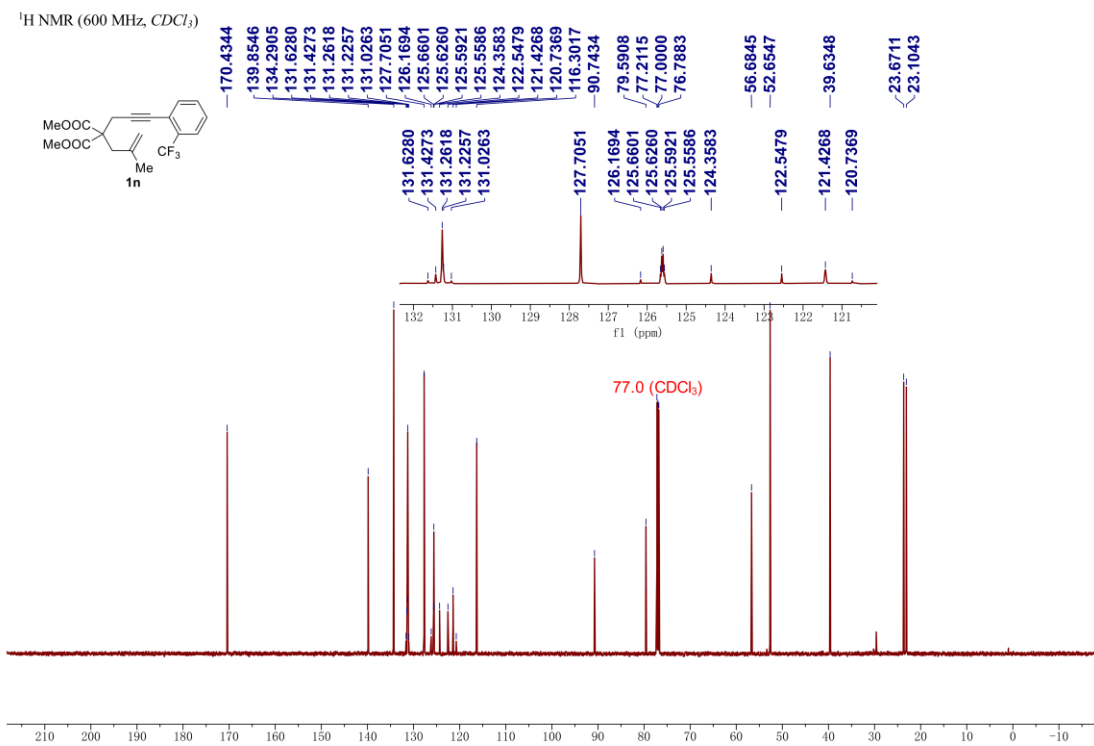

<sup>1</sup>H NMR (600 MHz, CDCl<sub>3</sub>)

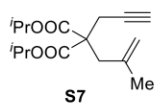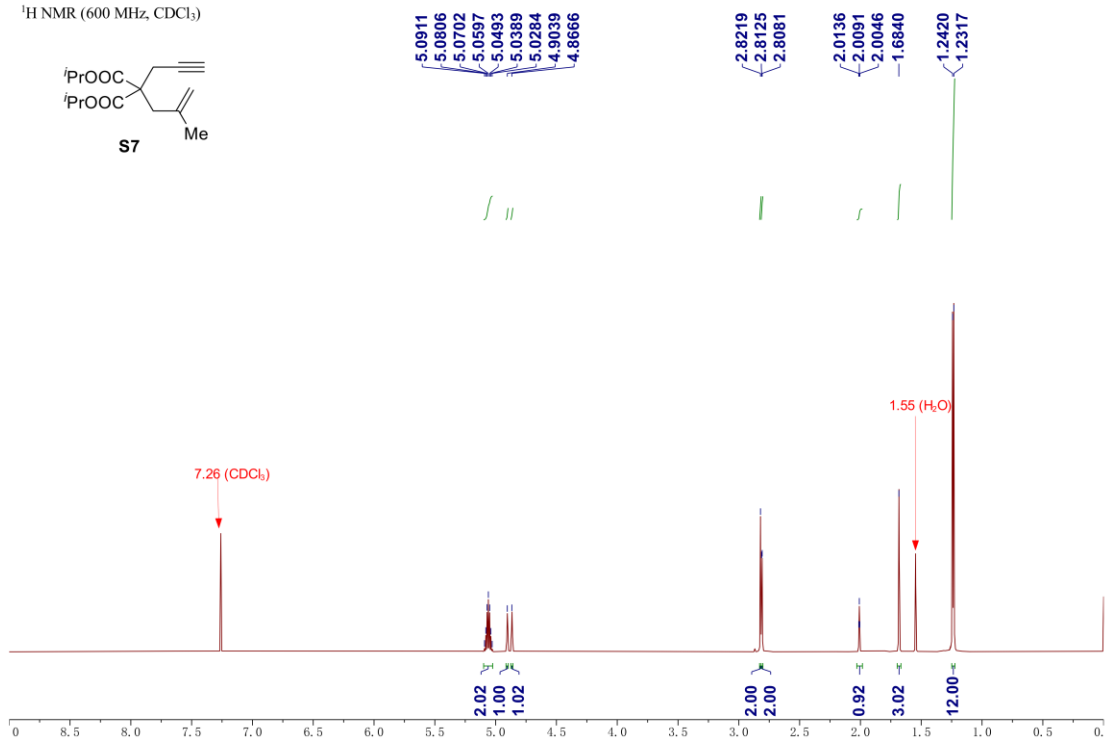

<sup>13</sup>C NMR (151 MHz, CDCl<sub>3</sub>)

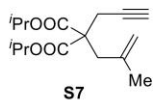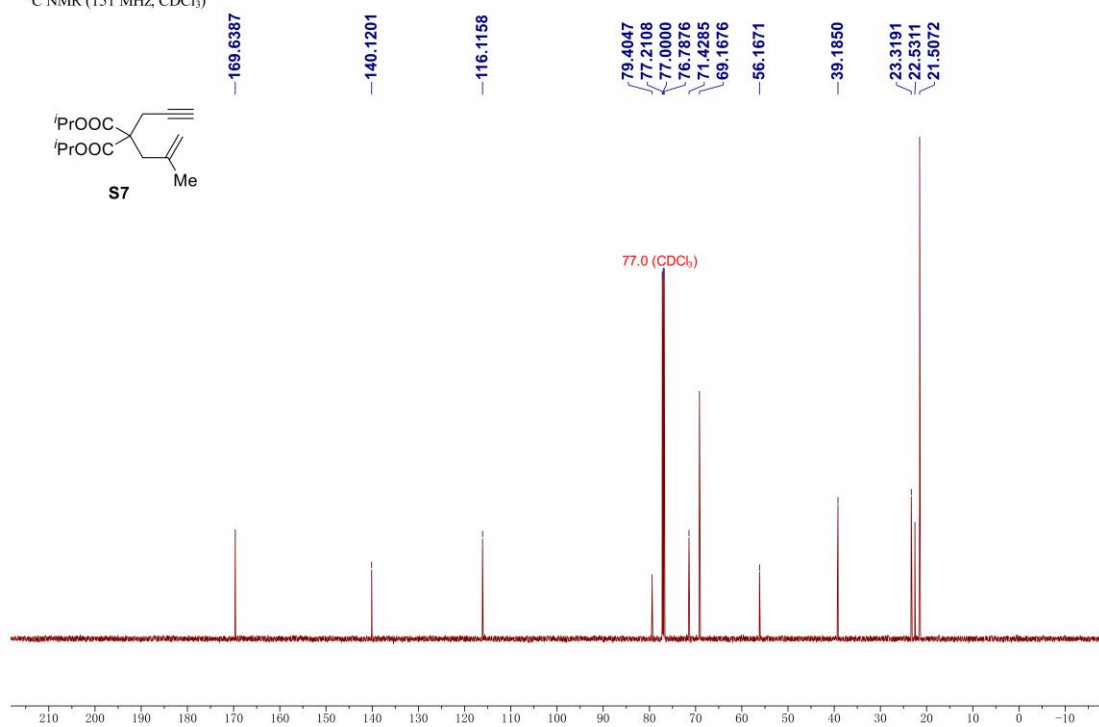

<sup>1</sup>H NMR (600 MHz, CDCl<sub>3</sub>)

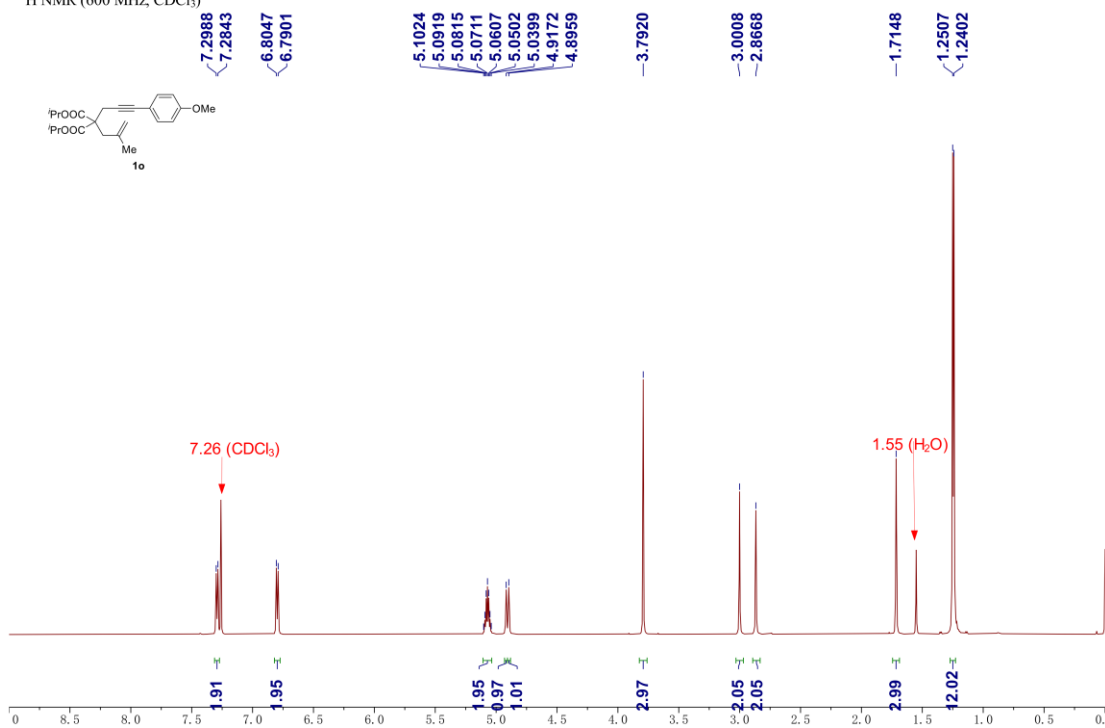

<sup>13</sup>C NMR (151 MHz, CDCl<sub>3</sub>)

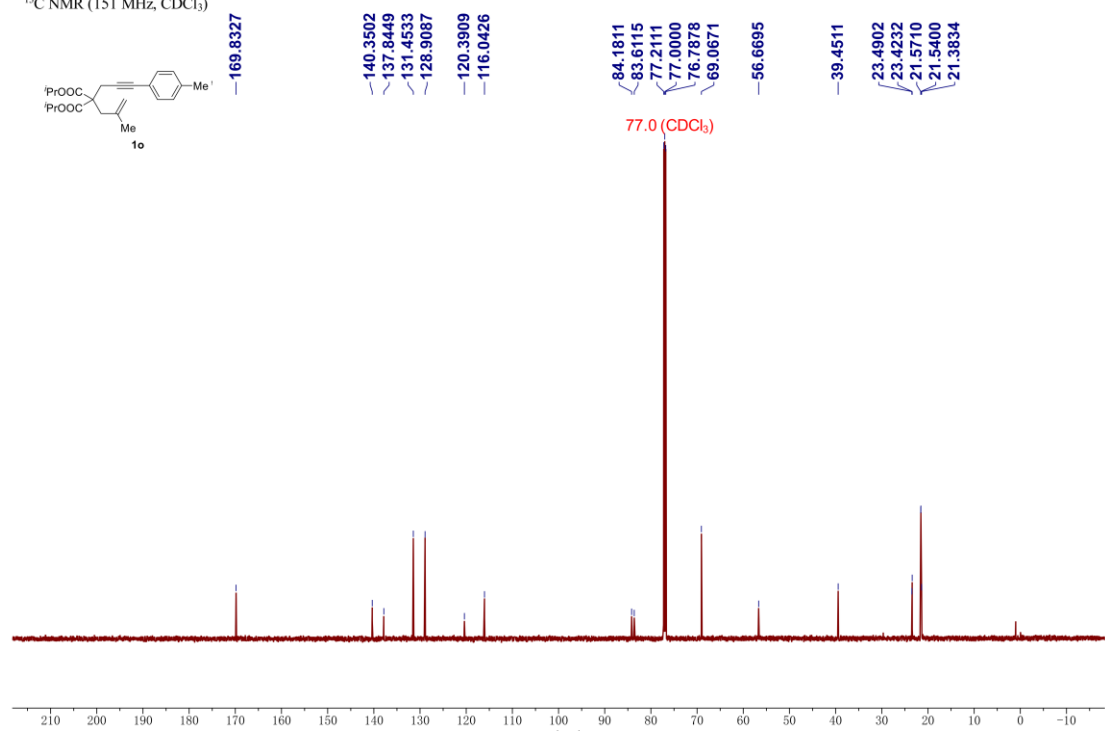

<sup>1</sup>H NMR (600 MHz, CDCl<sub>3</sub>)

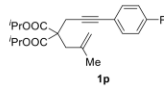

7.3414  
7.3322  
7.3271  
7.3179  
6.9766  
6.9621  
6.9477

5.1048  
5.0944  
5.0839  
5.0735  
5.0631  
5.0527  
5.0424  
4.9226  
4.8862

3.0029  
2.8604

1.7115  
1.2540  
1.2500  
1.2434  
1.2393

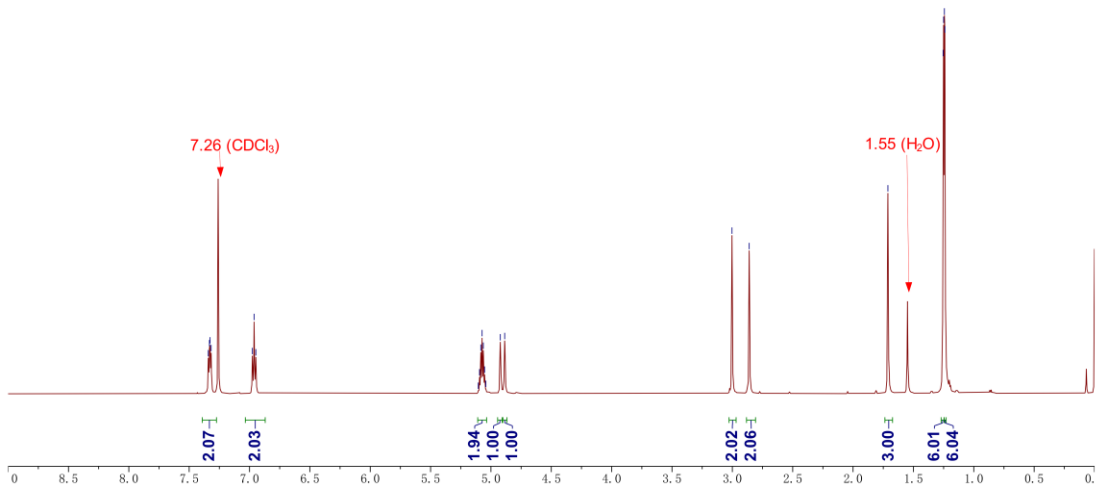

<sup>13</sup>C NMR (151 MHz, CDCl<sub>3</sub>)

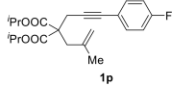

169.7677  
163.0838  
161.4352

140.2830  
133.4042  
133.3497

119.4623  
119.4696  
116.0867  
115.4808  
115.3356

84.7084  
82.4930  
77.2119  
77.0000  
76.7880  
69.1366

56.5813

39.4913

23.4276  
23.3939  
21.5656  
21.5316

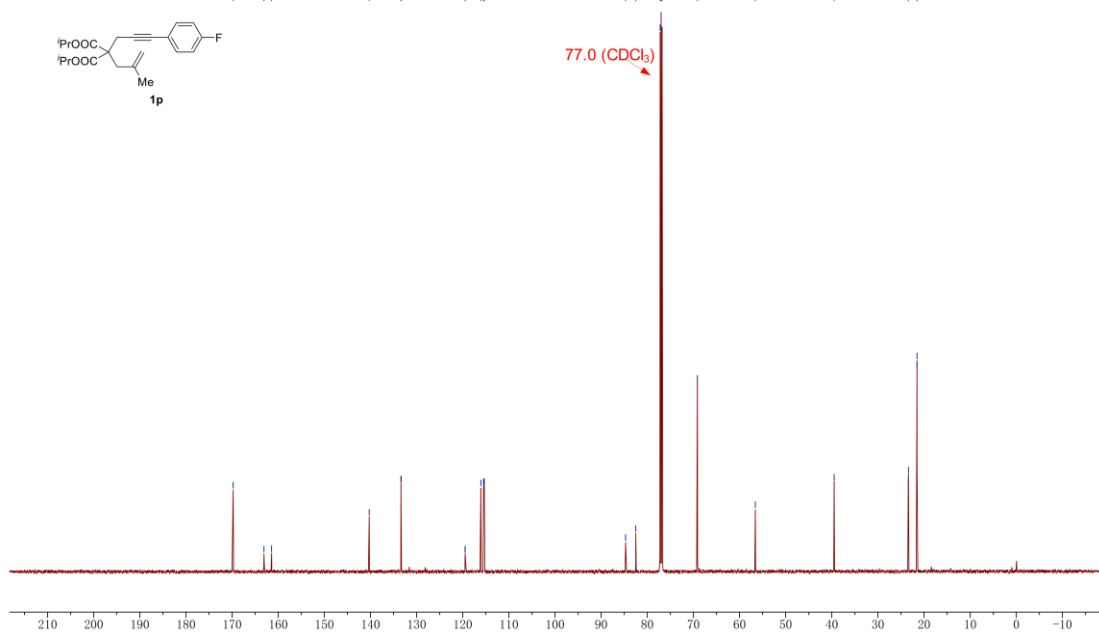

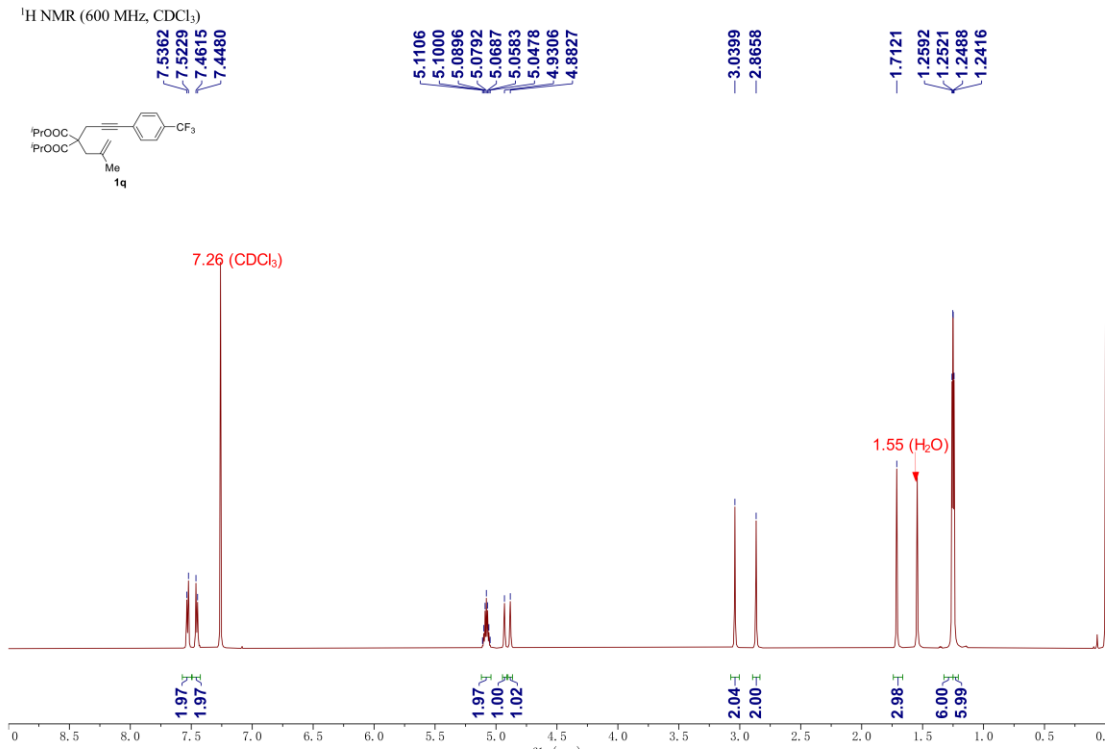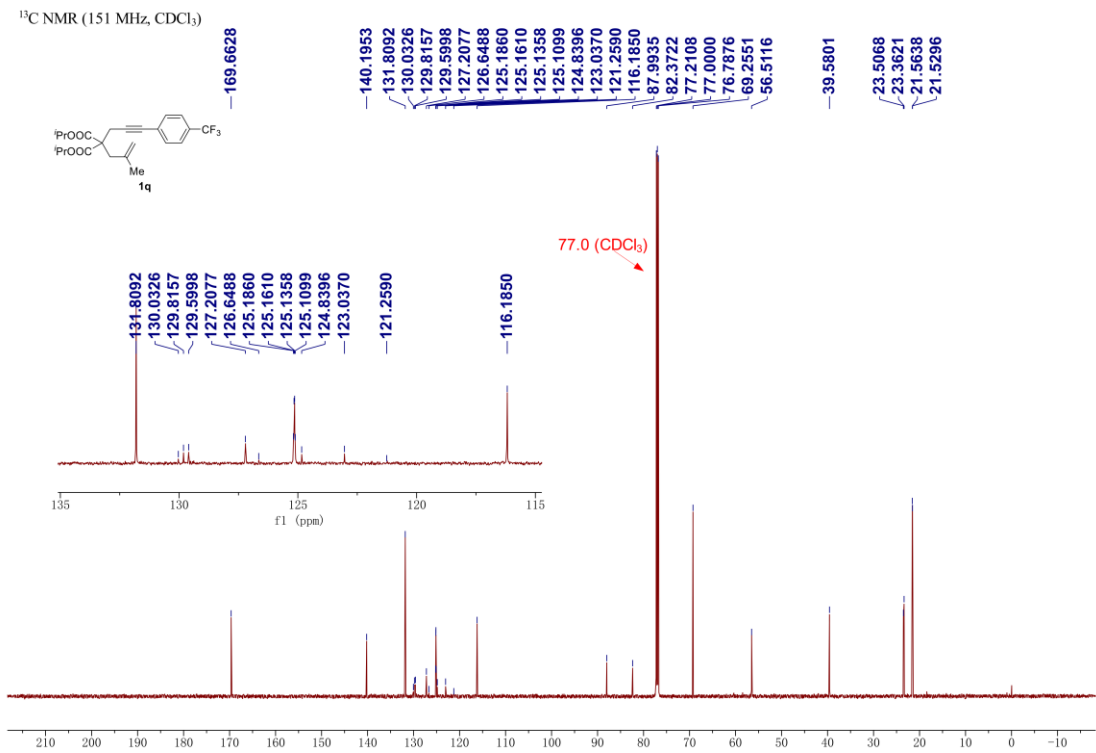

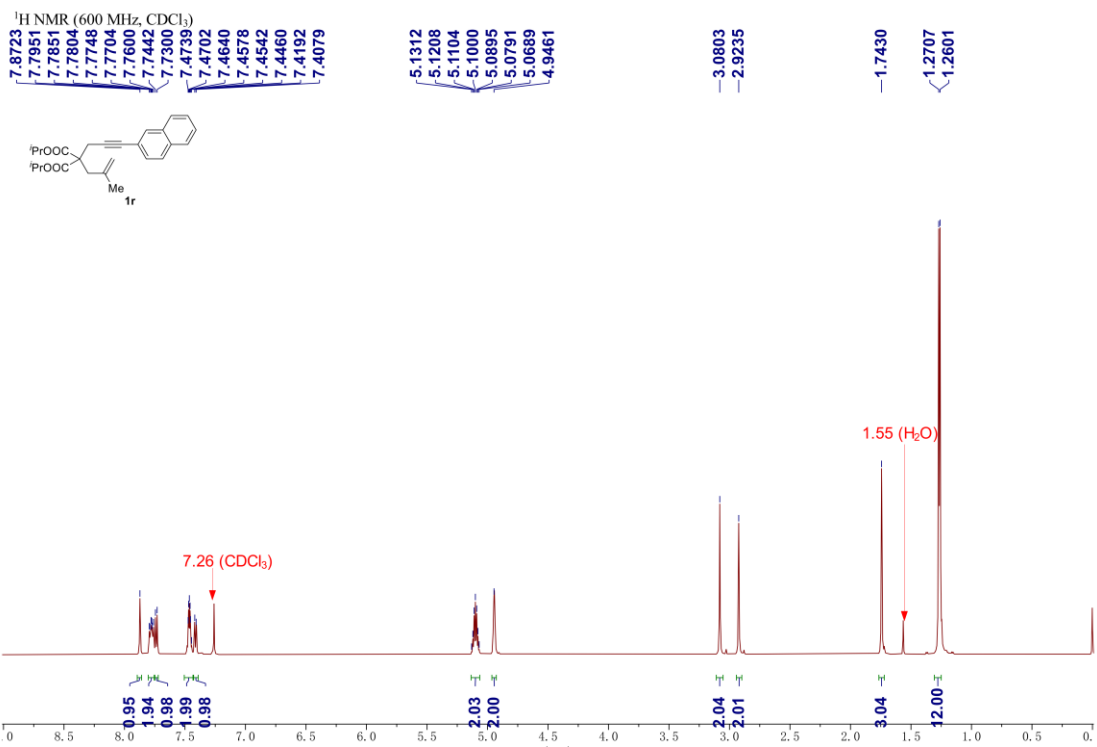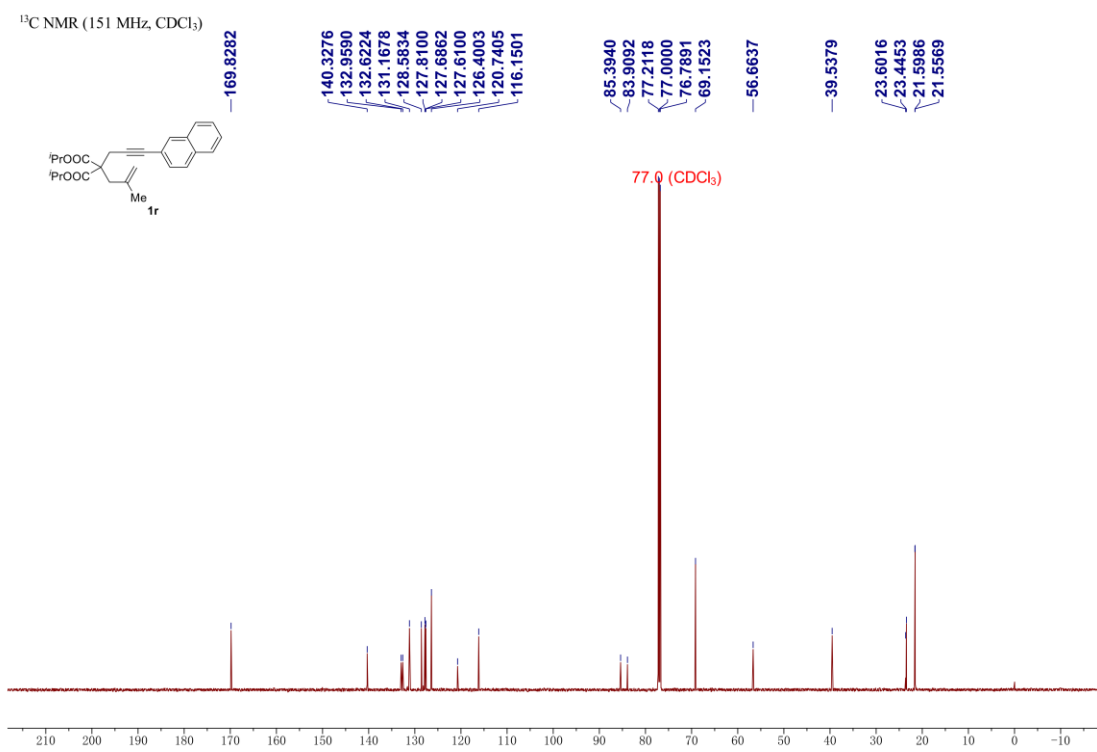

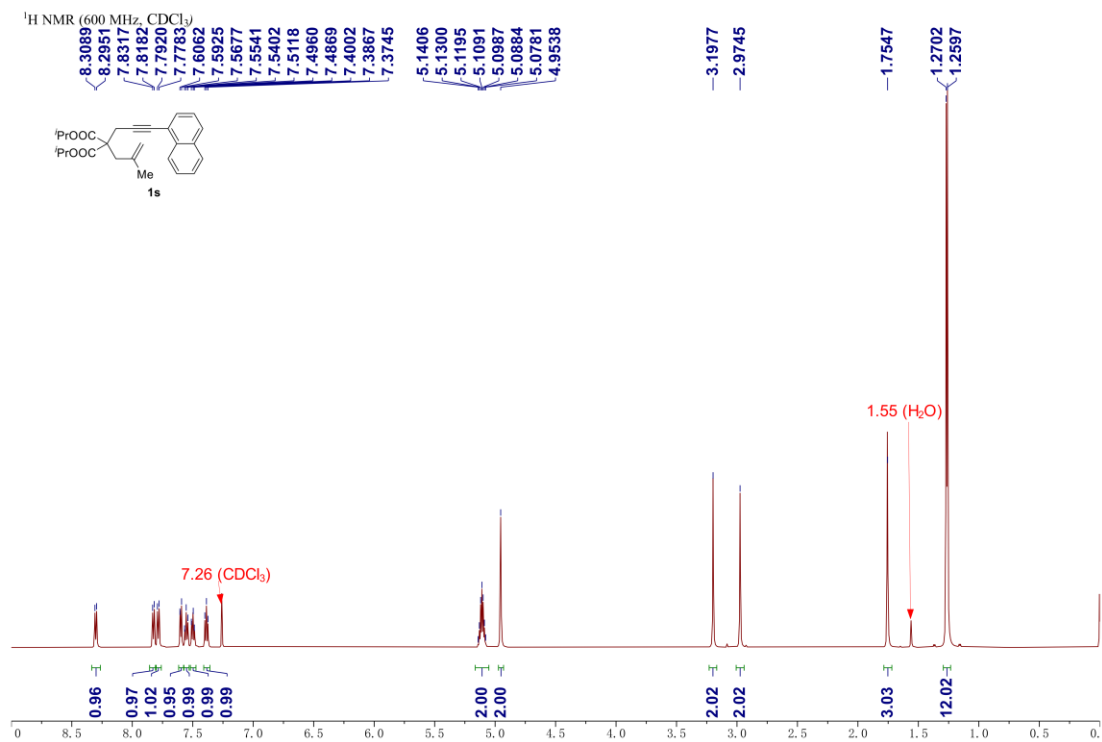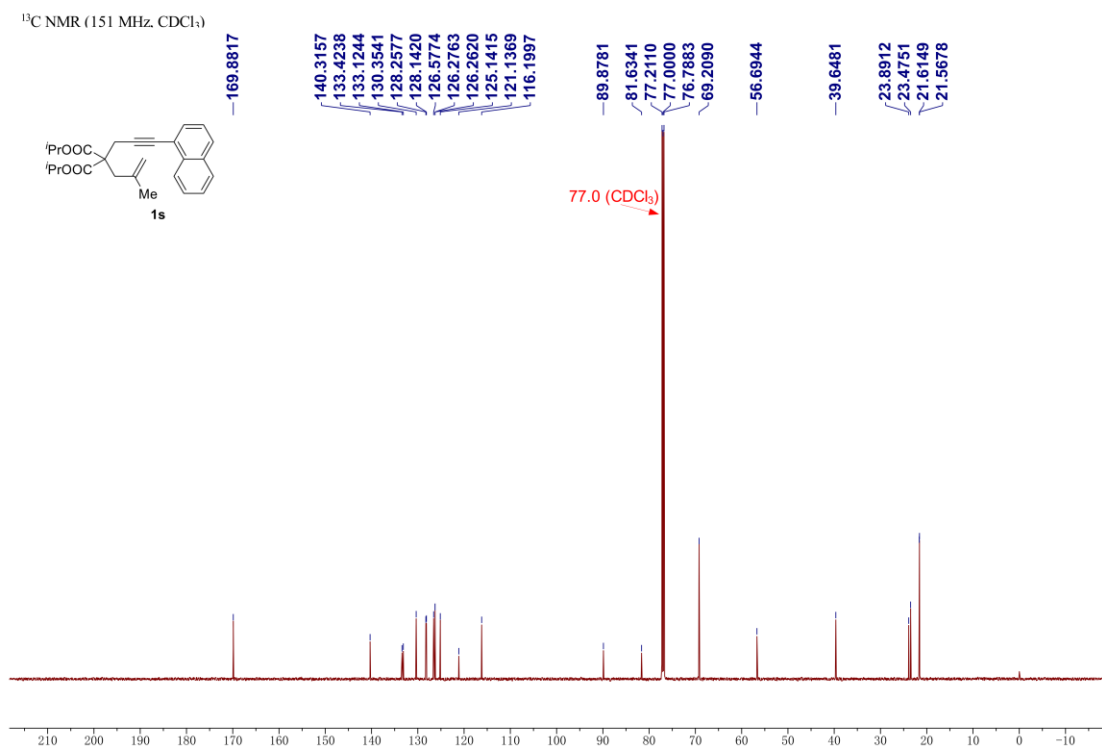



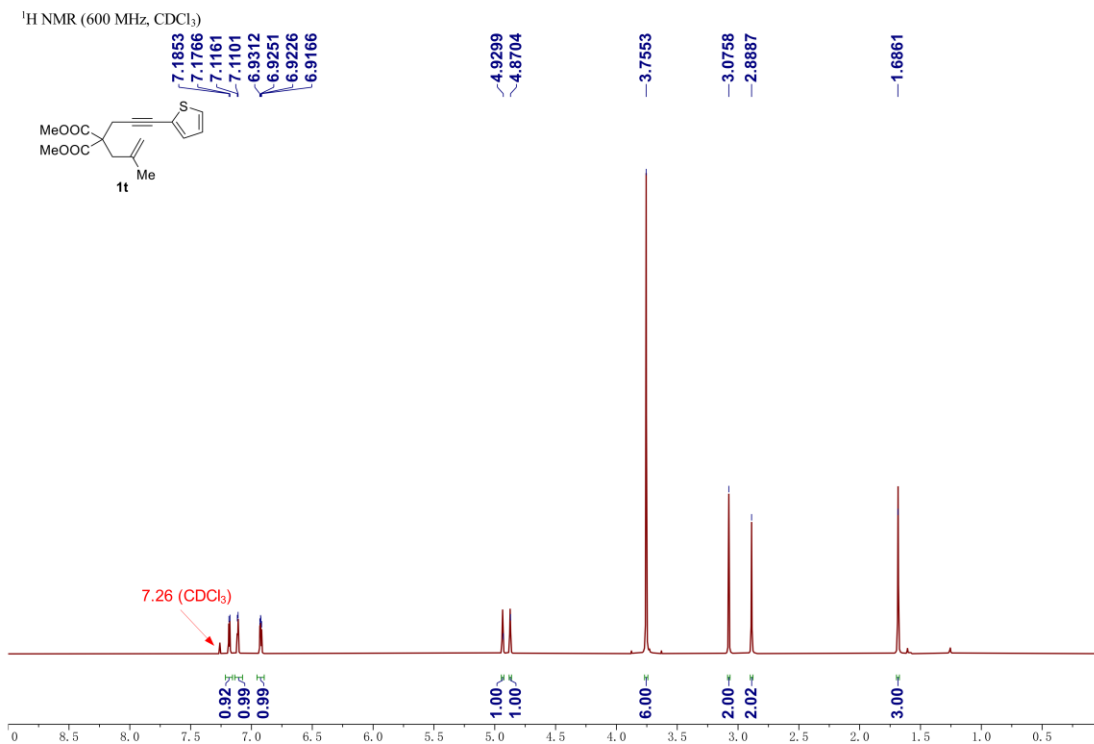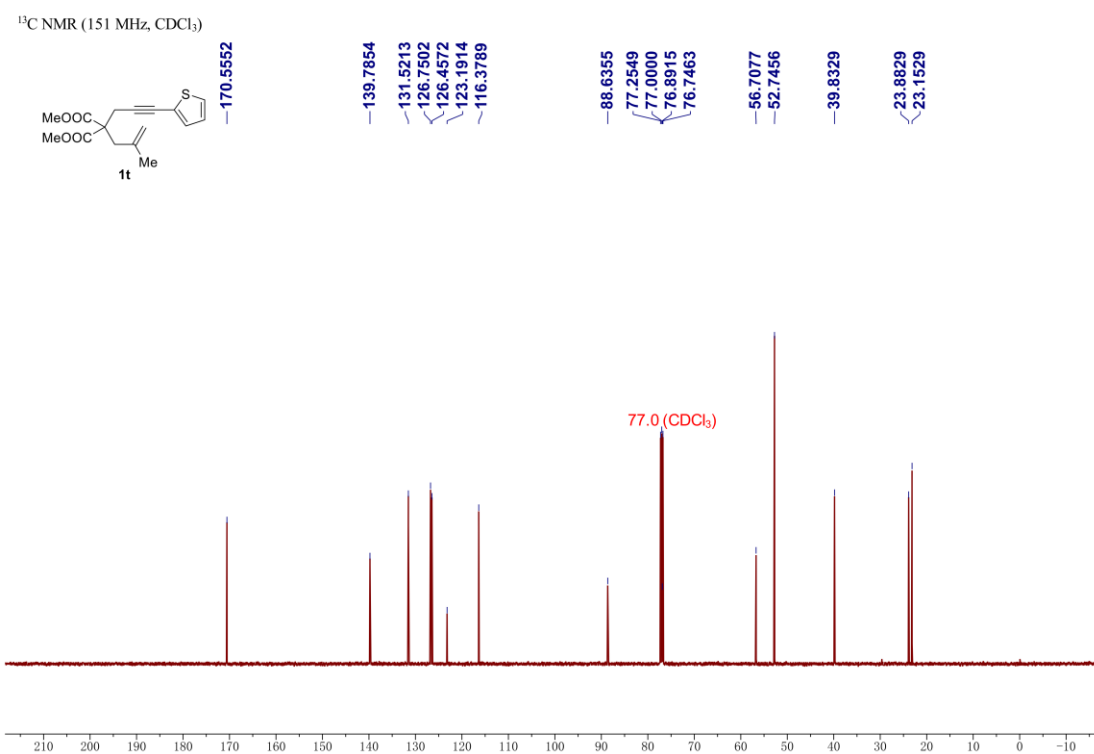

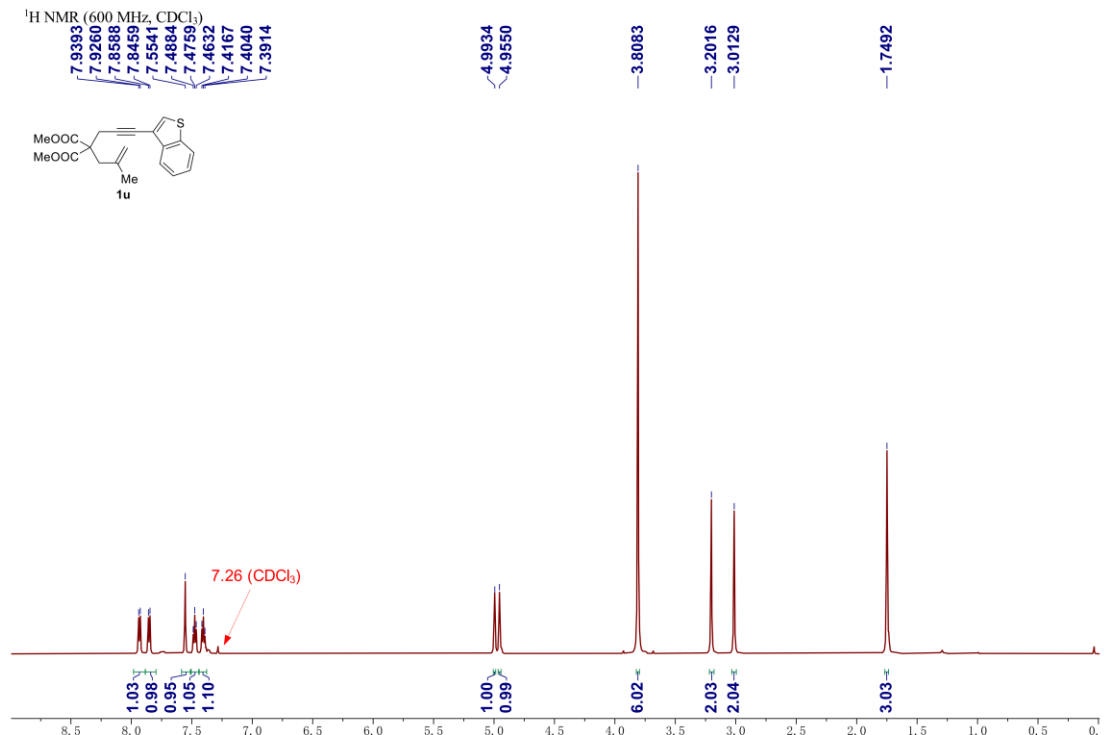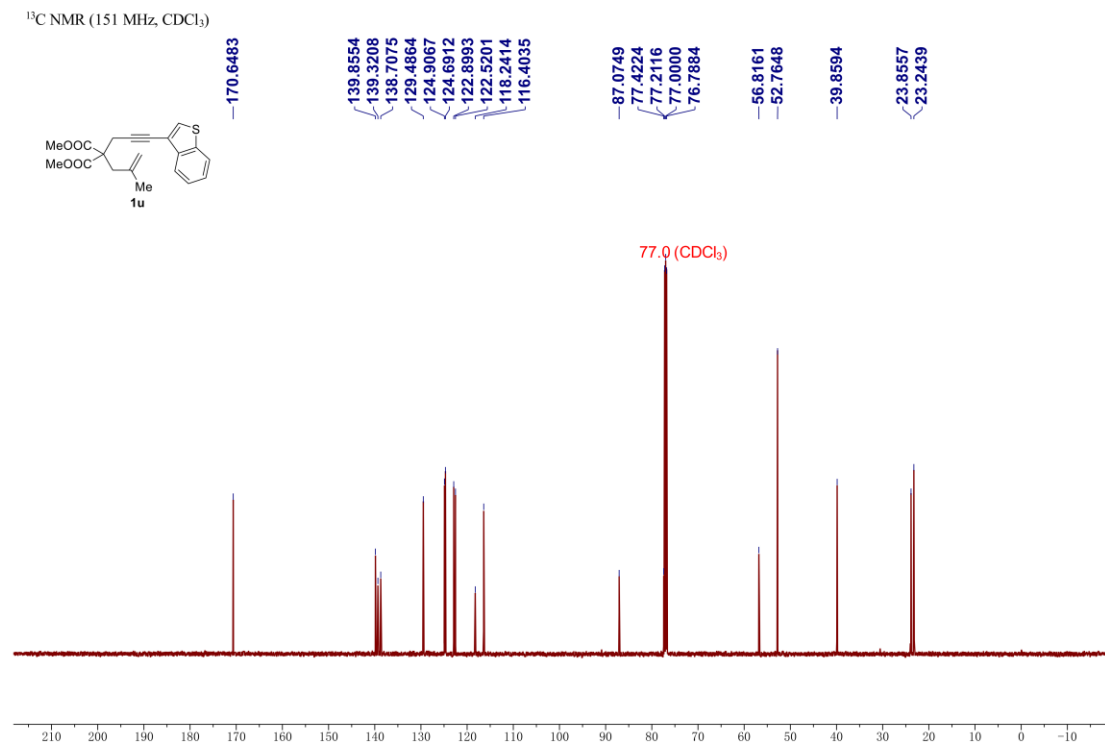

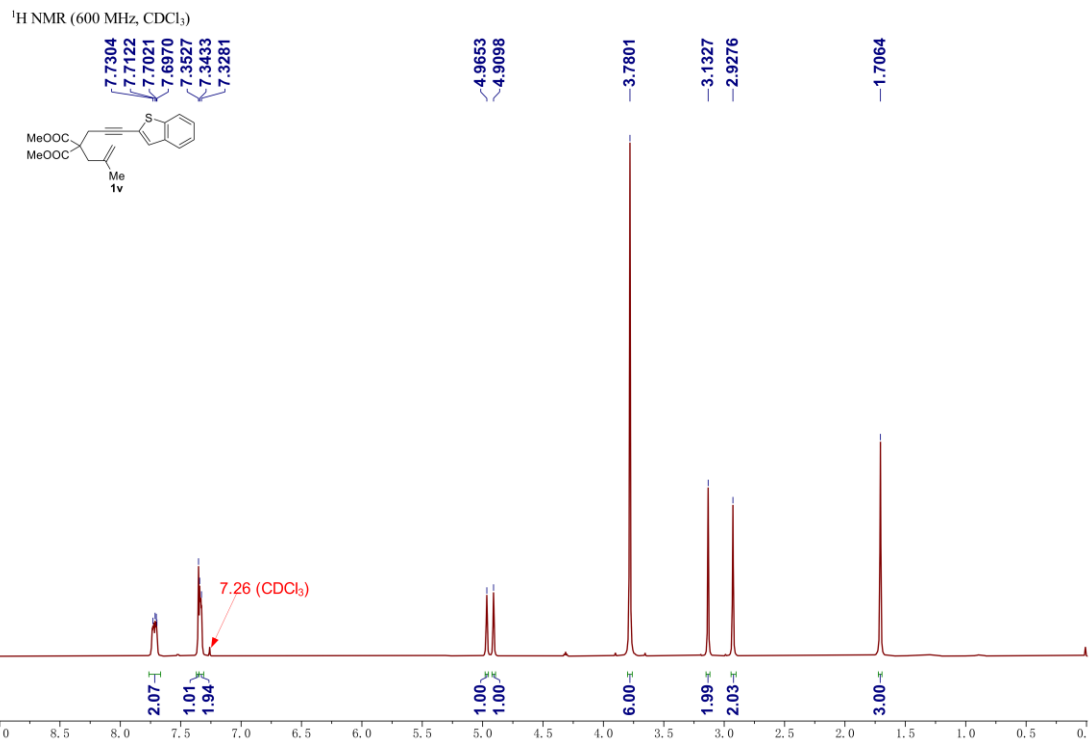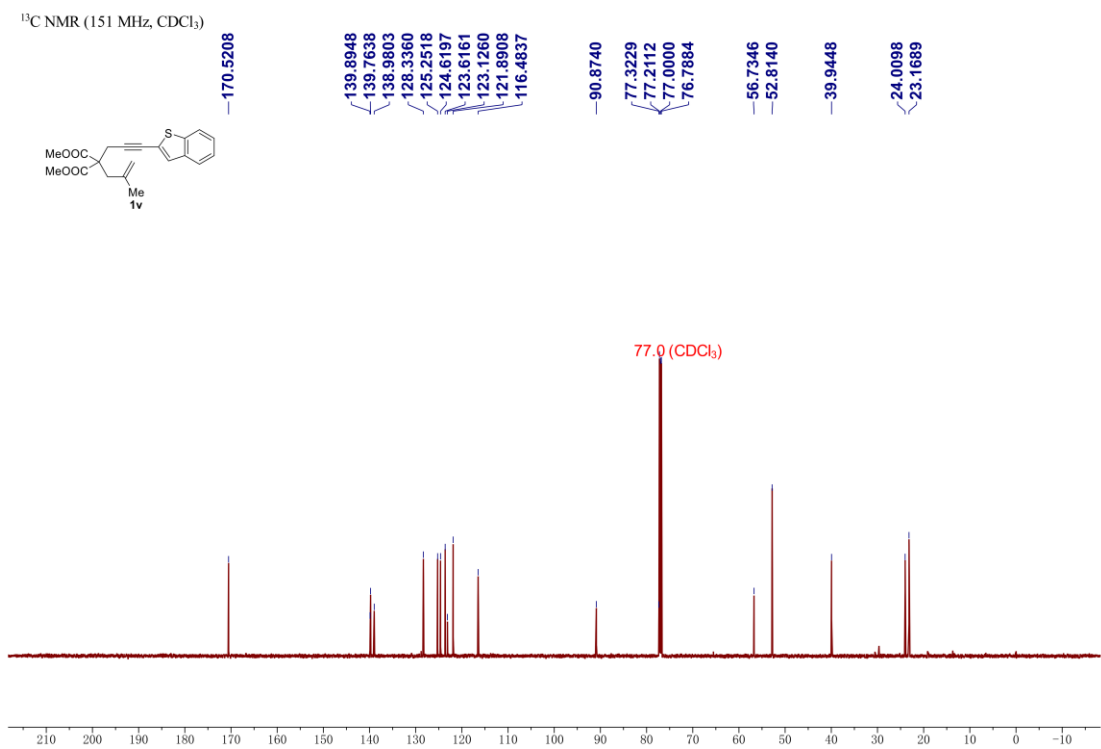

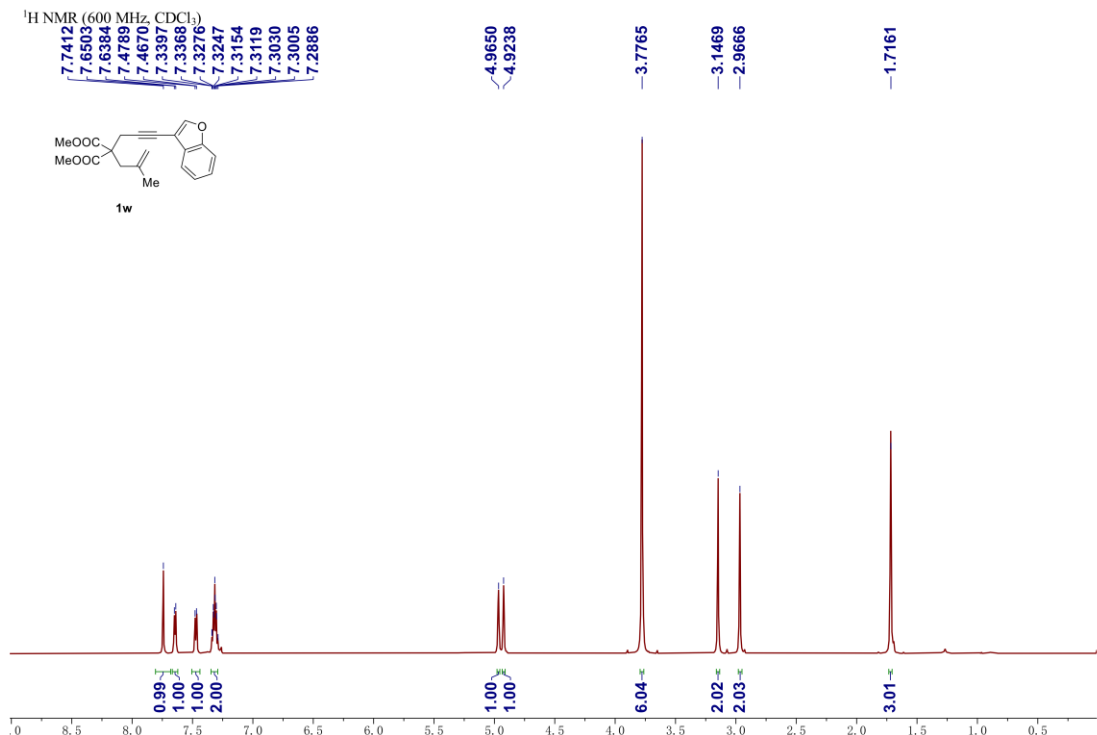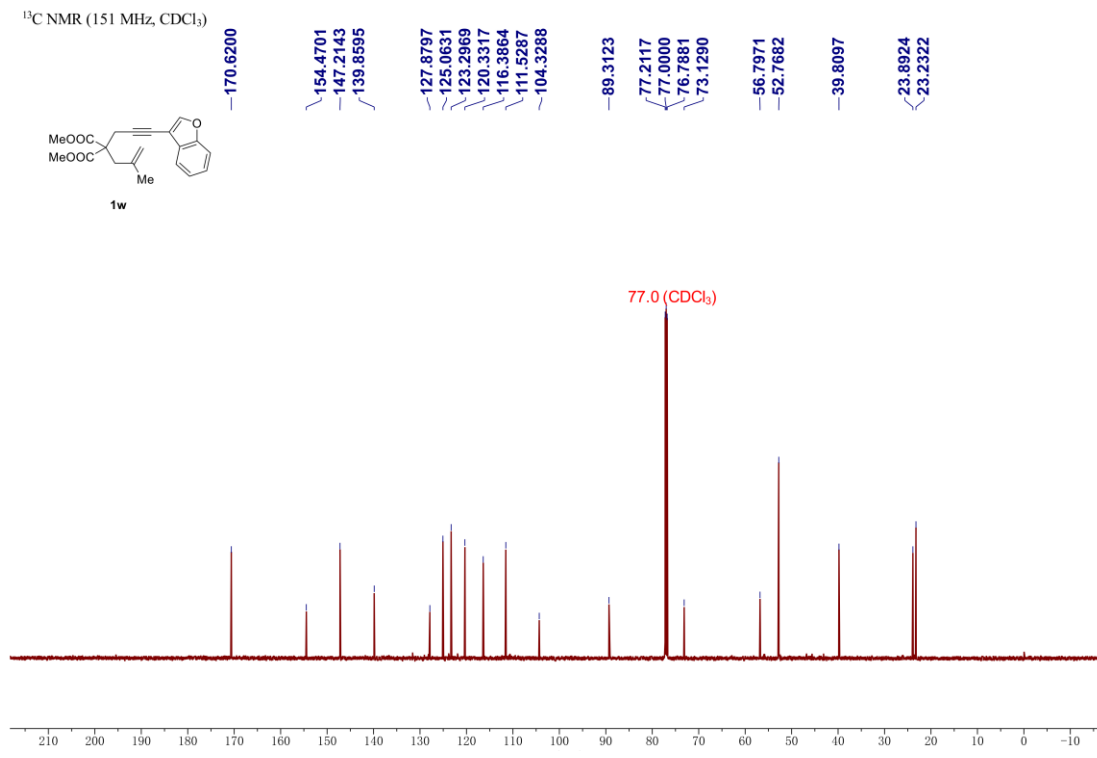

<sup>1</sup>H NMR (600 MHz, CDCl<sub>3</sub>)

7.5219  
7.5090  
7.4269  
7.4131  
7.3163  
7.3039  
7.2904  
7.2268  
7.2143  
7.2018  
6.8533

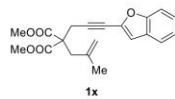

4.9685  
4.9237

3.7771

3.1597  
2.9344

1.7022

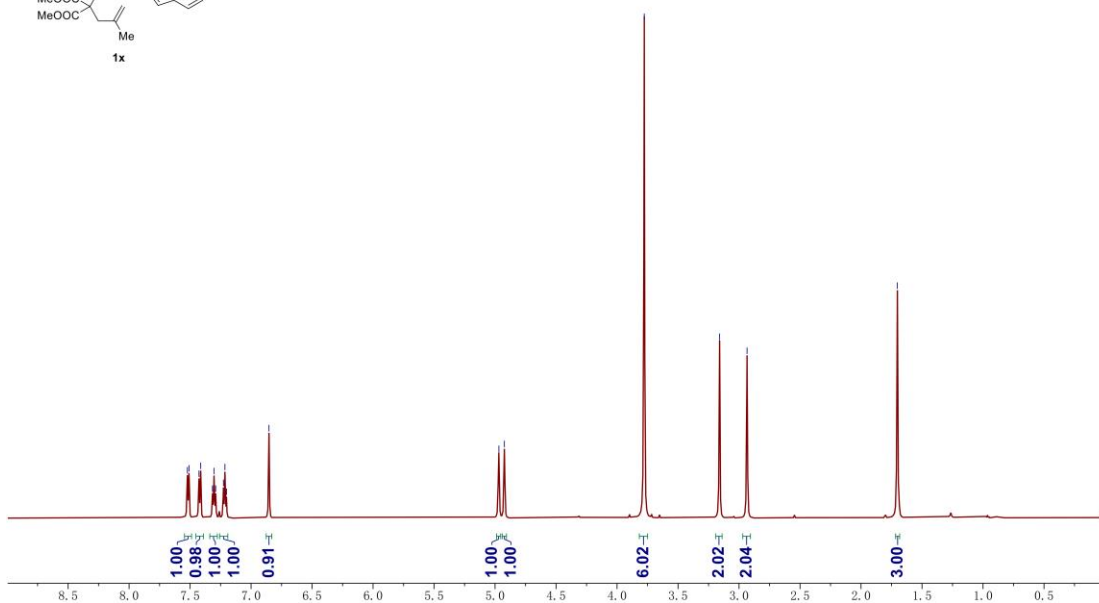

<sup>13</sup>C NMR (151 MHz, CDCl<sub>3</sub>)

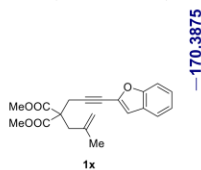

170.3875

154.5703

139.6531

138.4509

127.5277

125.3601

123.1410

121.0035

116.6017

111.1280

111.0811

91.1928

77.2116

77.0000

76.7897

74.3448

56.5469

52.8471

39.9389

23.8387

23.1296

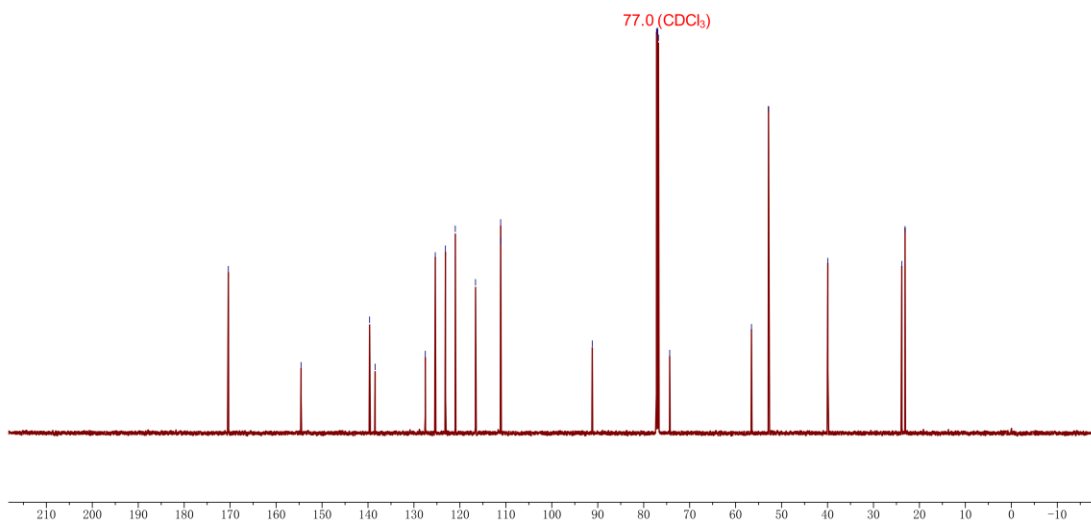

<sup>1</sup>H NMR (600 MHz, CDCl<sub>3</sub>)

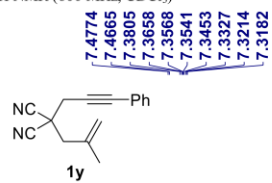

7.4774  
7.4665  
7.3805  
7.3658  
7.3541  
7.3453  
7.3327  
7.3214  
7.3182

5.2111  
5.1616

3.1735

2.8312

1.9969

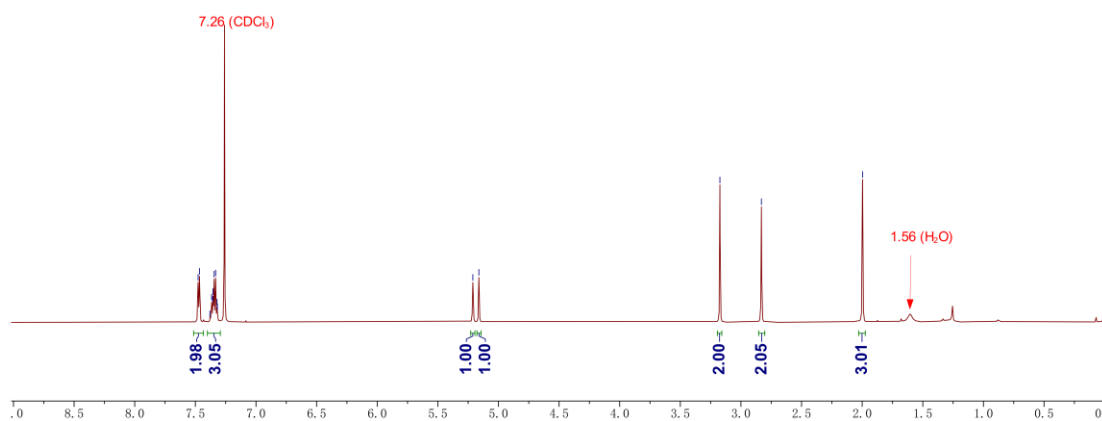

<sup>13</sup>C NMR (151 MHz, Chloroform-*d*)

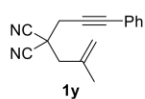

136.8230  
131.9250  
129.0307  
128.4060  
121.7030  
119.1820  
114.8589

87.1795  
79.6283  
77.2104  
77.0000  
76.7884

43.8355  
36.1846  
29.6282  
23.1202

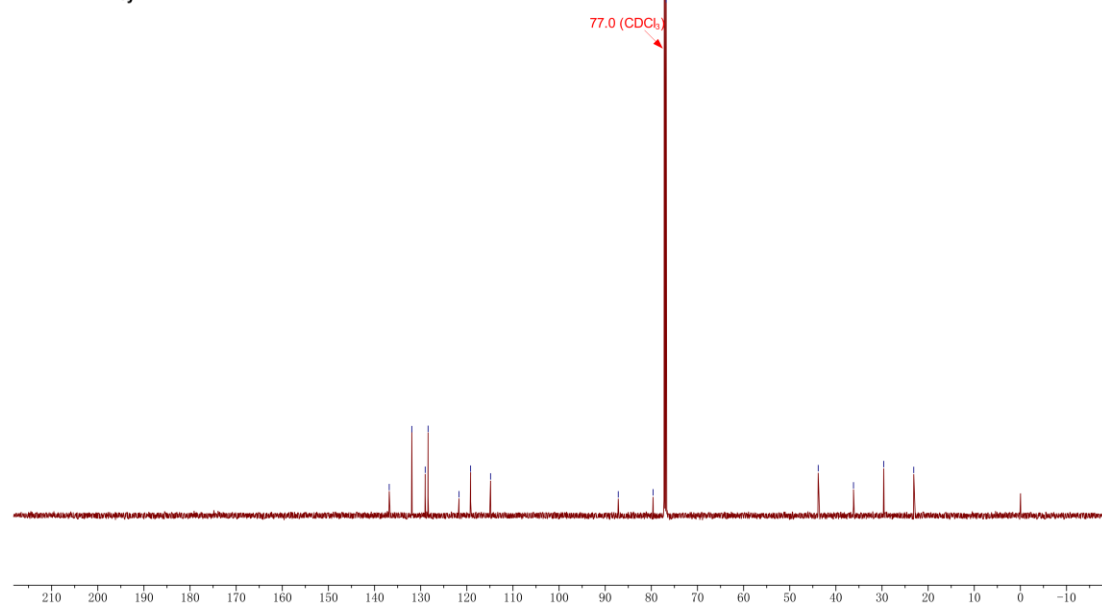

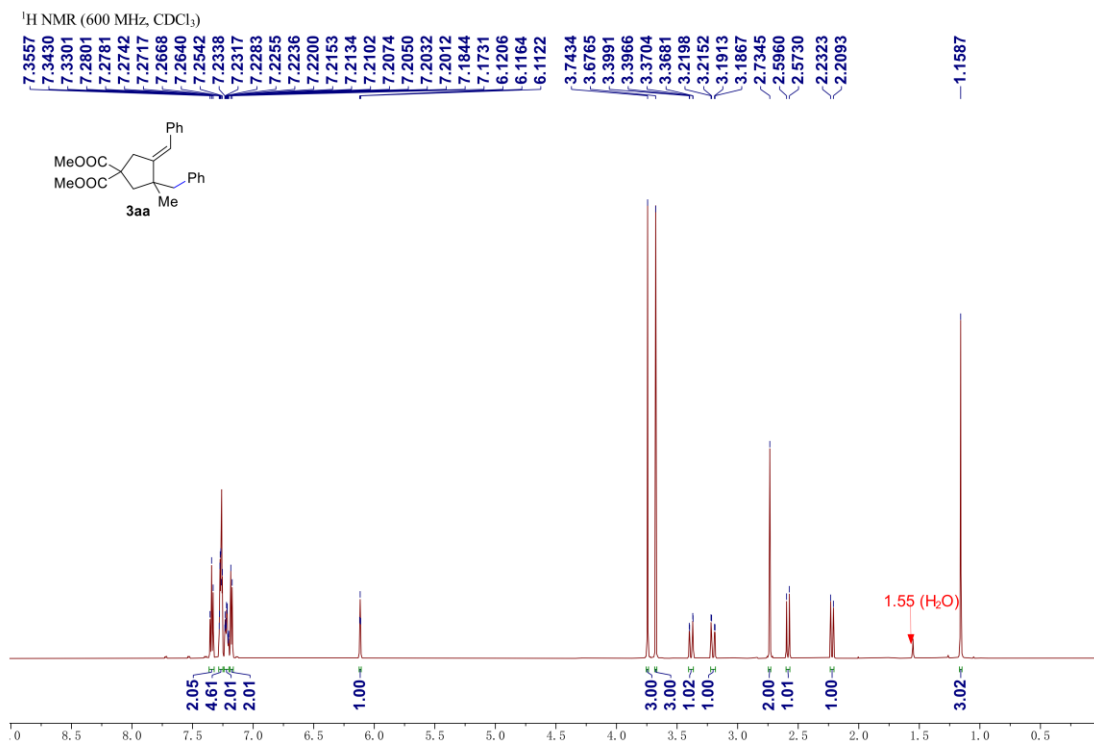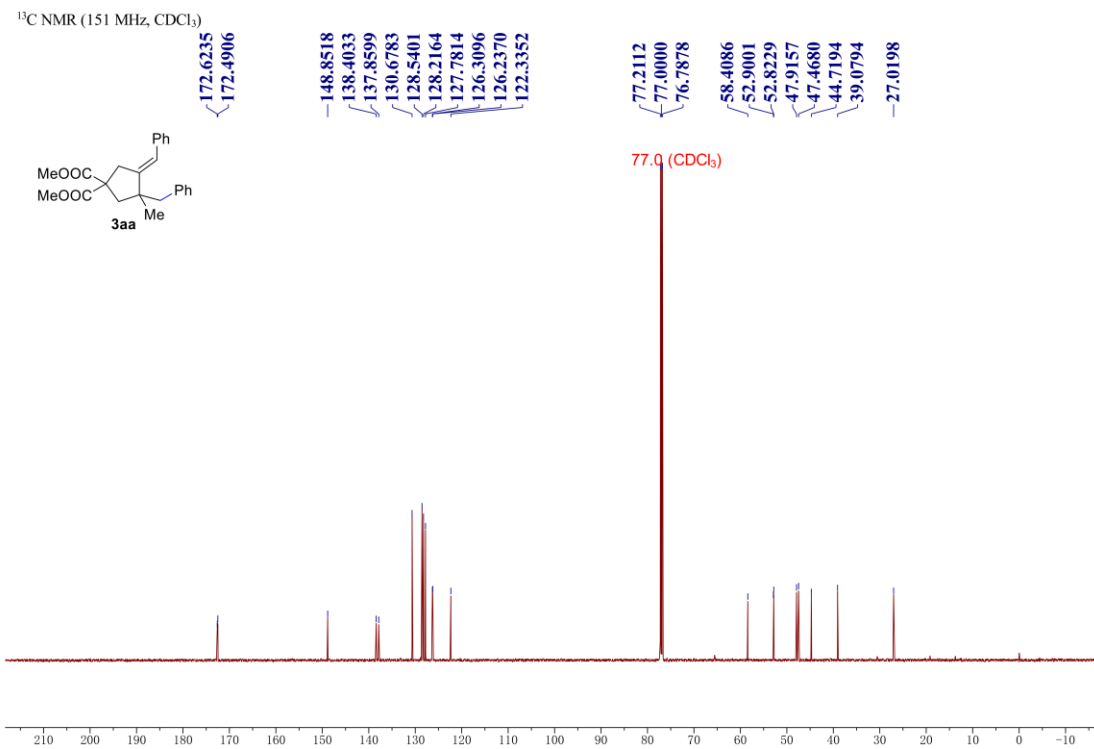

<sup>1</sup>H NMR (600 MHz, CDCl<sub>3</sub>)

7.3554  
7.3426  
7.3298  
7.2751  
7.2656  
7.2601  
7.2534  
7.2314  
7.2232  
7.2194  
7.2134  
7.2011  
7.1836  
7.1724

3.7441  
3.6772  
3.4017  
3.3732  
3.2228  
3.1943  
2.7343  
2.5956  
2.5726  
2.2331  
2.2101

— 1.1590

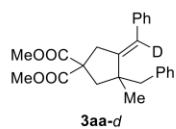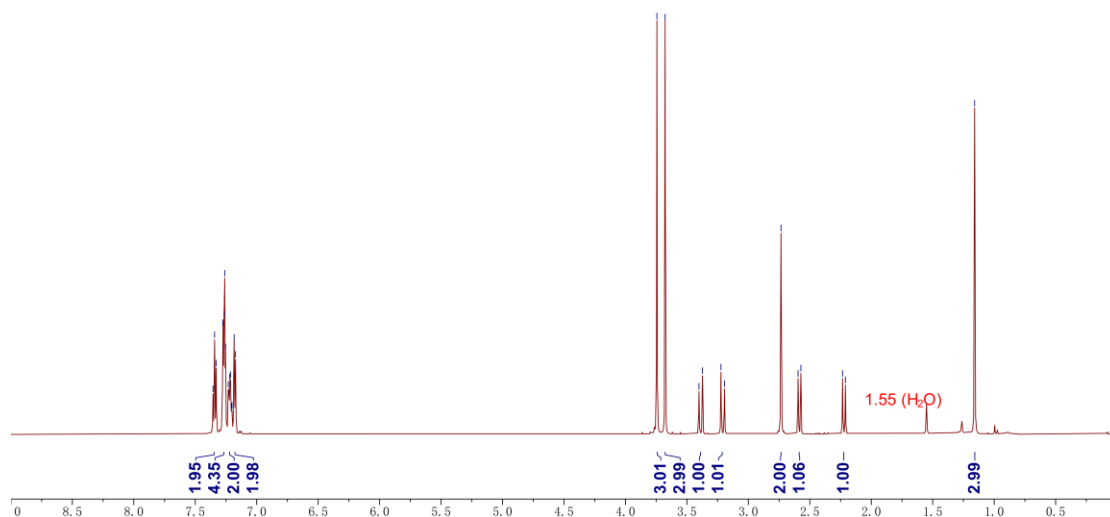

<sup>13</sup>C NMR (151 MHz, CDCl<sub>3</sub>)

172.6244  
172.4931

148.7565  
138.4077  
137.7979  
130.6800  
128.5259  
128.2211  
127.7805  
126.3116  
126.2369

77.2118  
77.0000  
76.7901

77.0 (CDCl<sub>3</sub>)

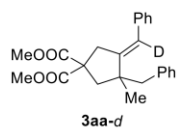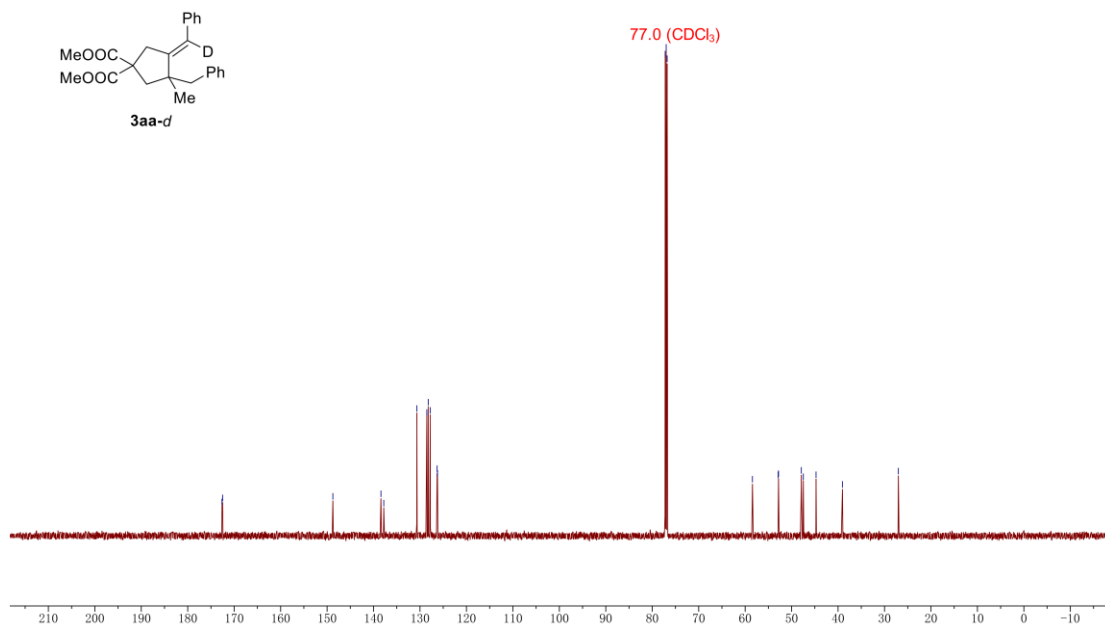



$^2\text{H}$  NMR (92 MHz,  $\text{CDCl}_3$ )

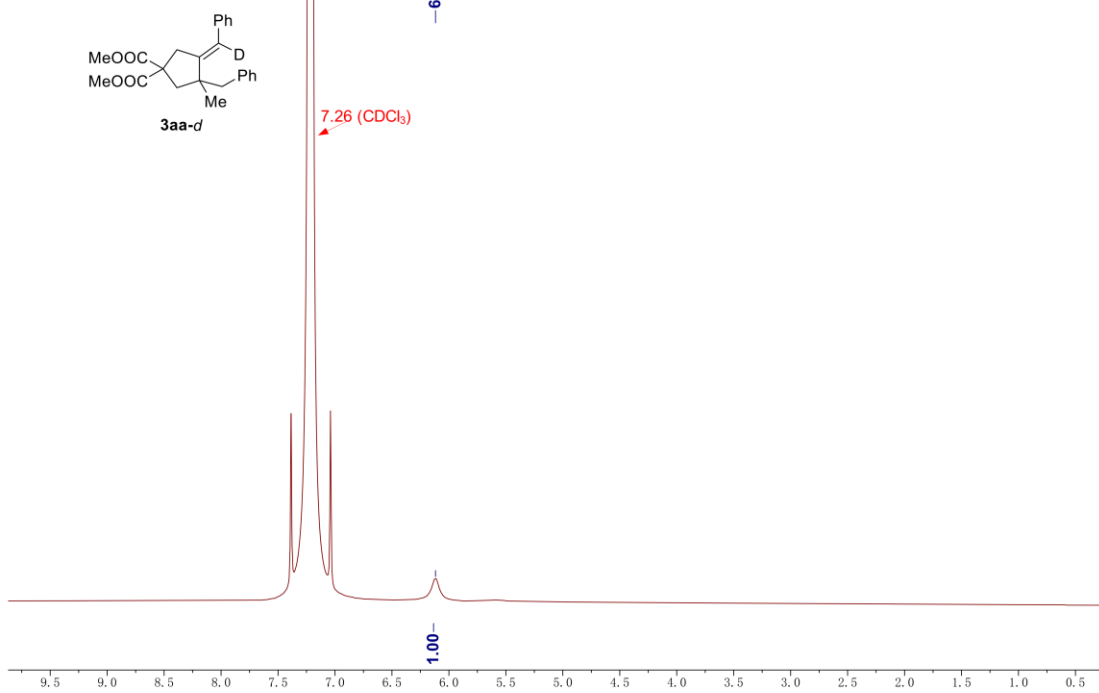

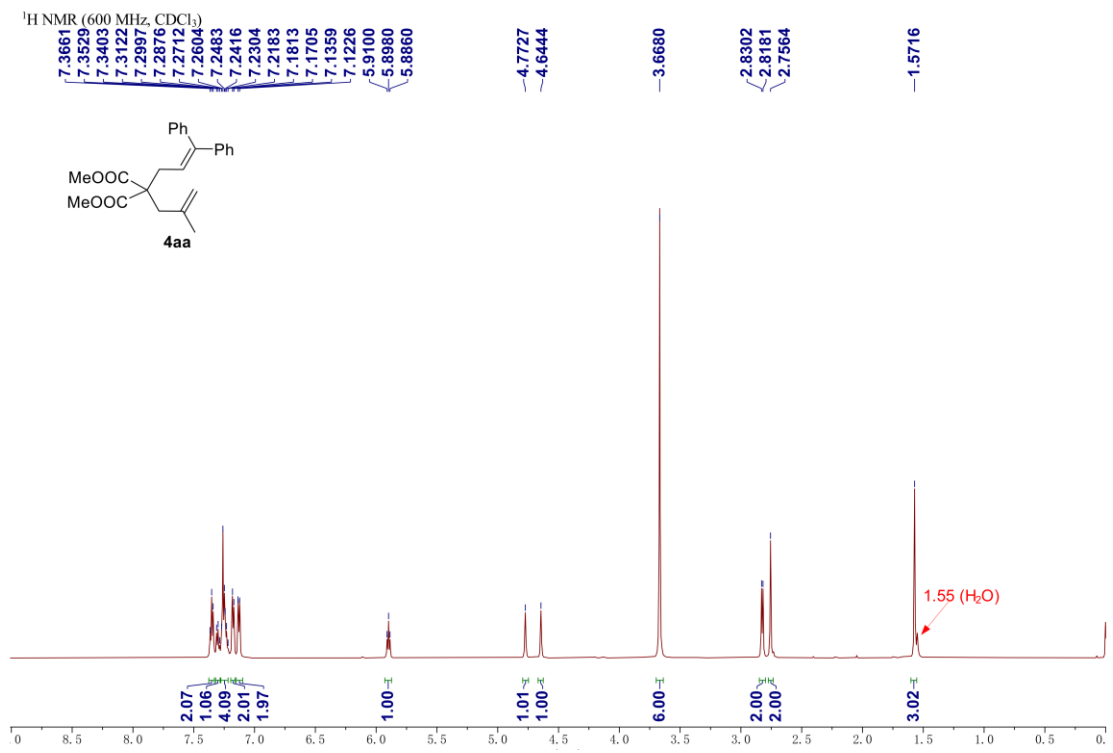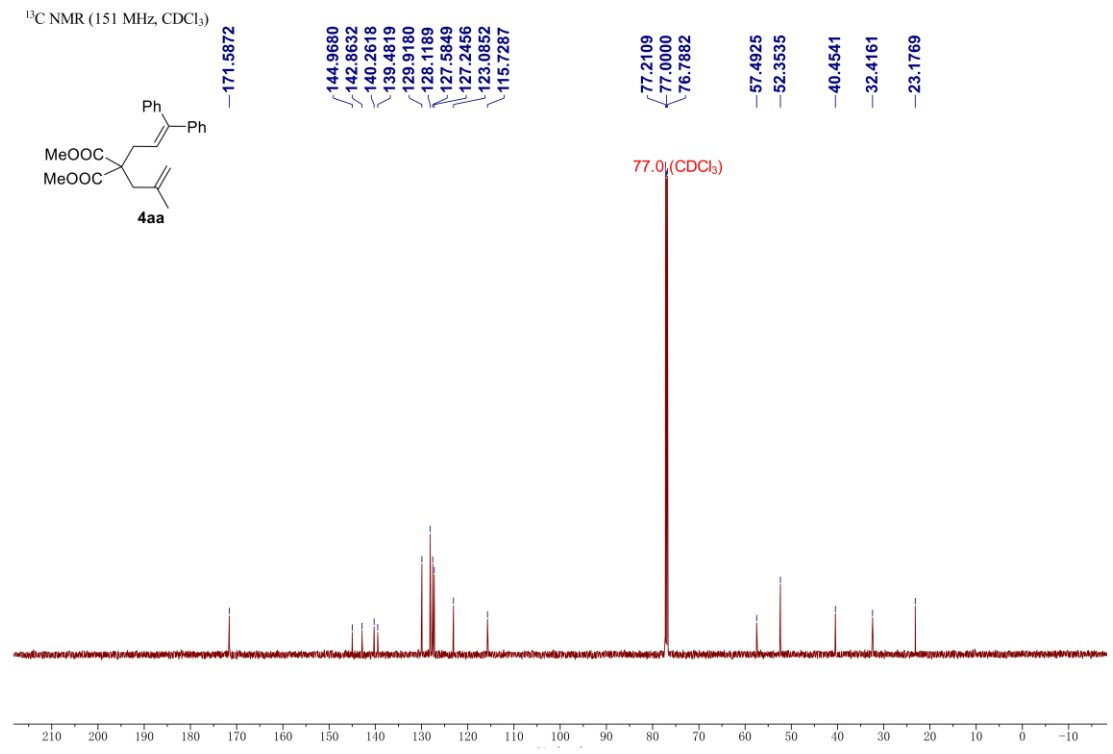

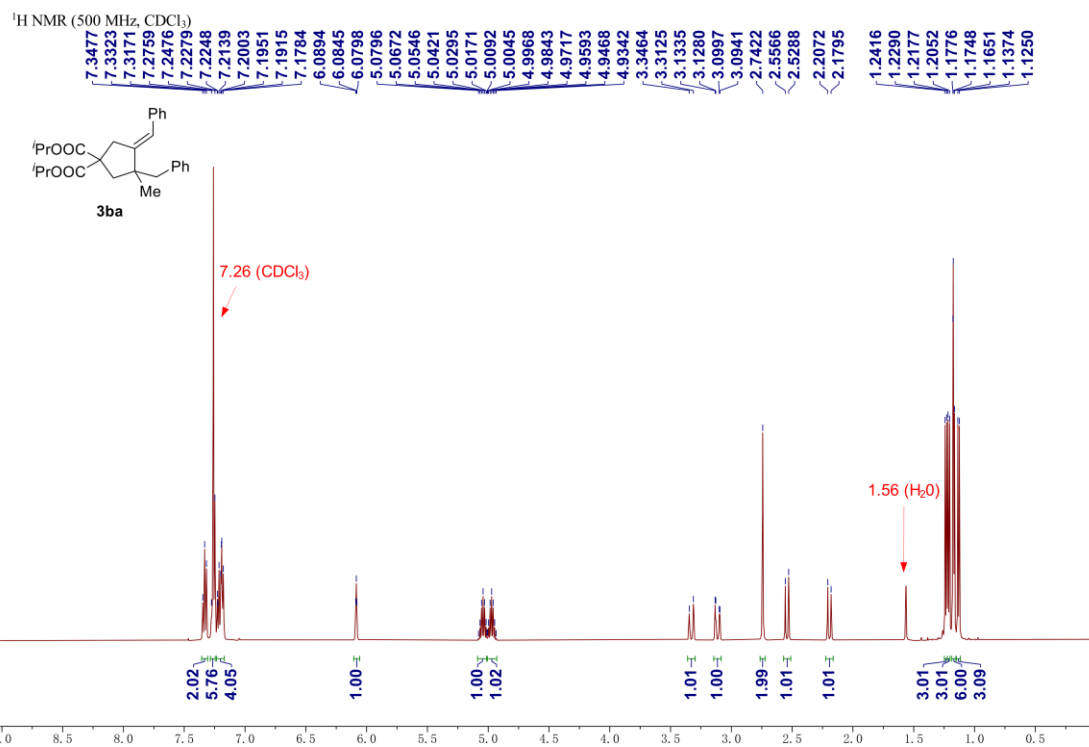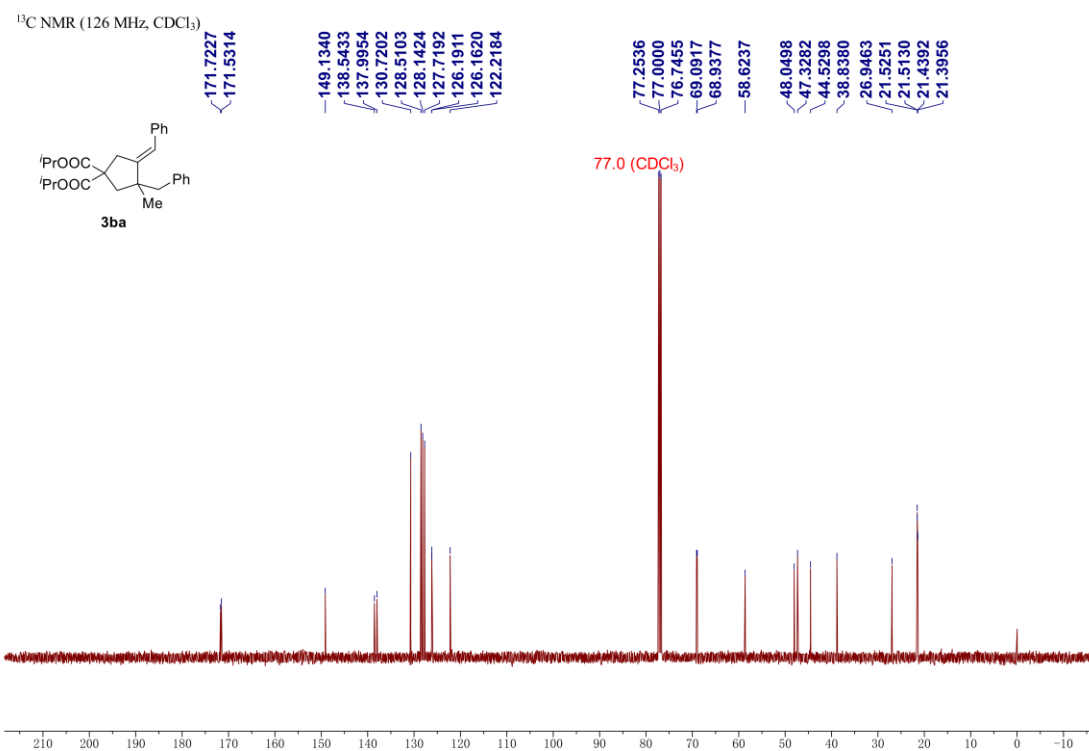

<sup>1</sup>H NMR (600 MHz, CDCl<sub>3</sub>)

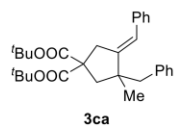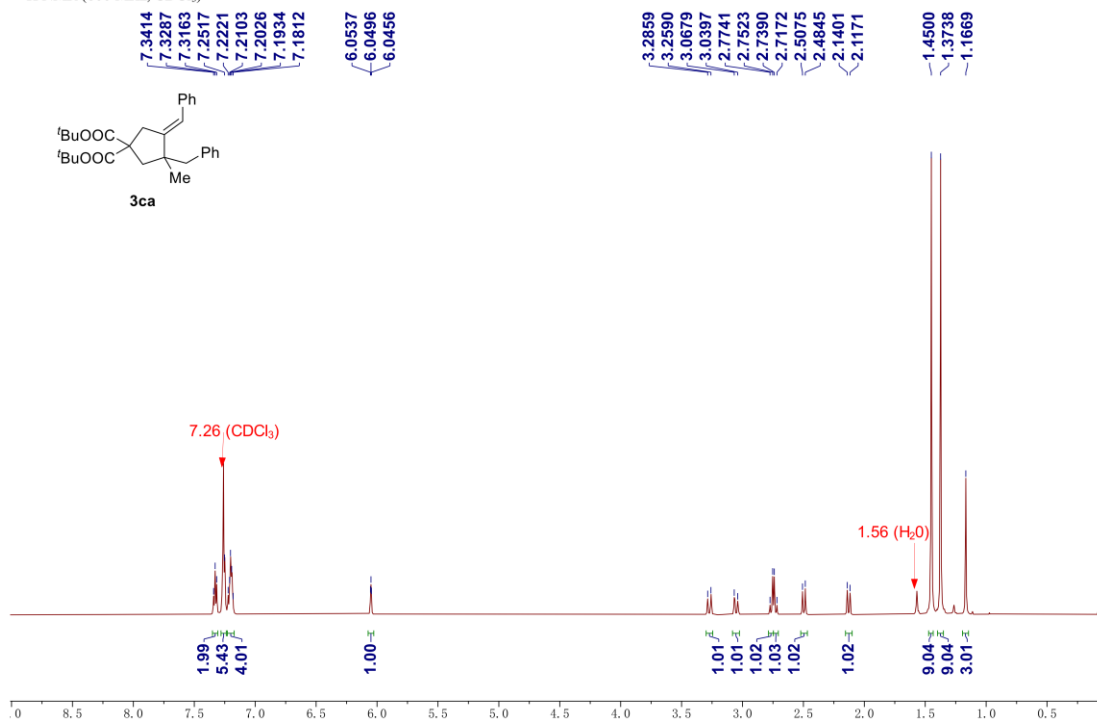

<sup>13</sup>C NMR (126 MHz, CDCl<sub>3</sub>)

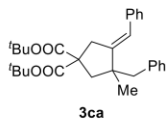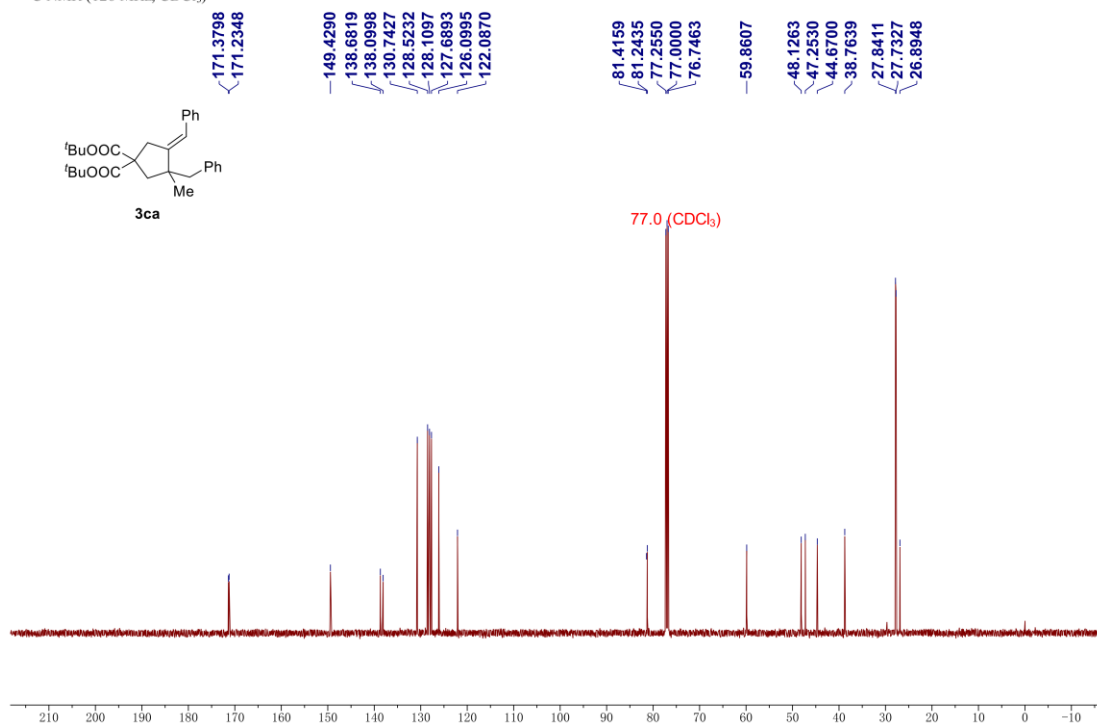

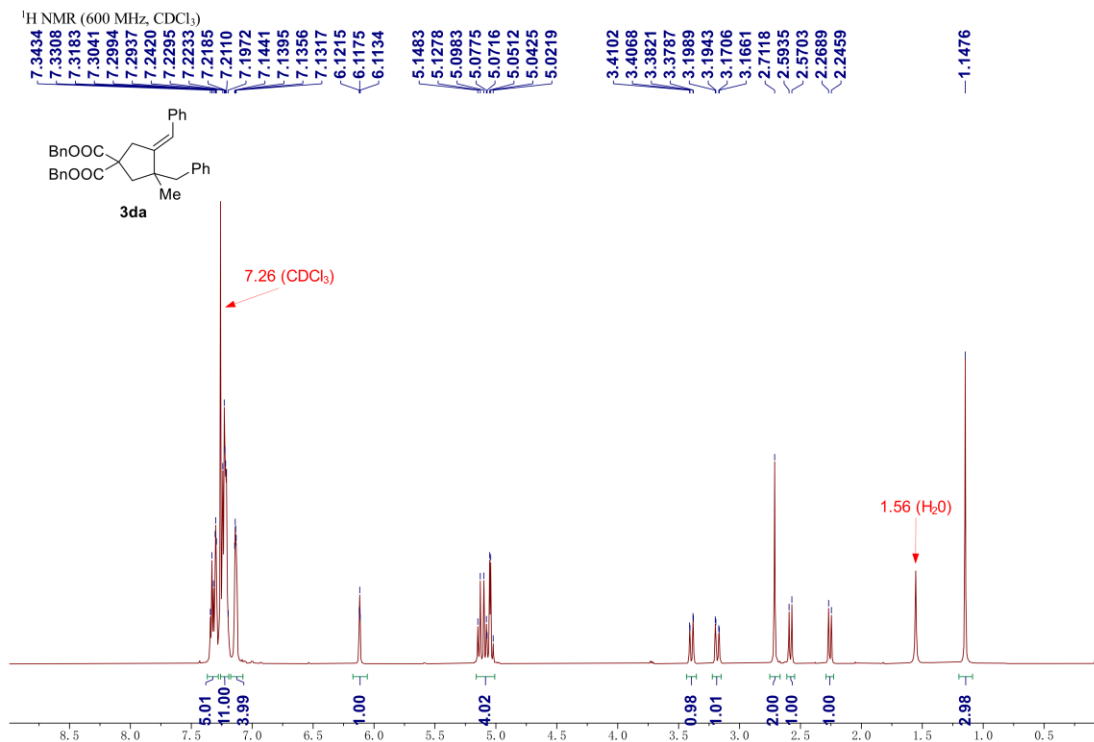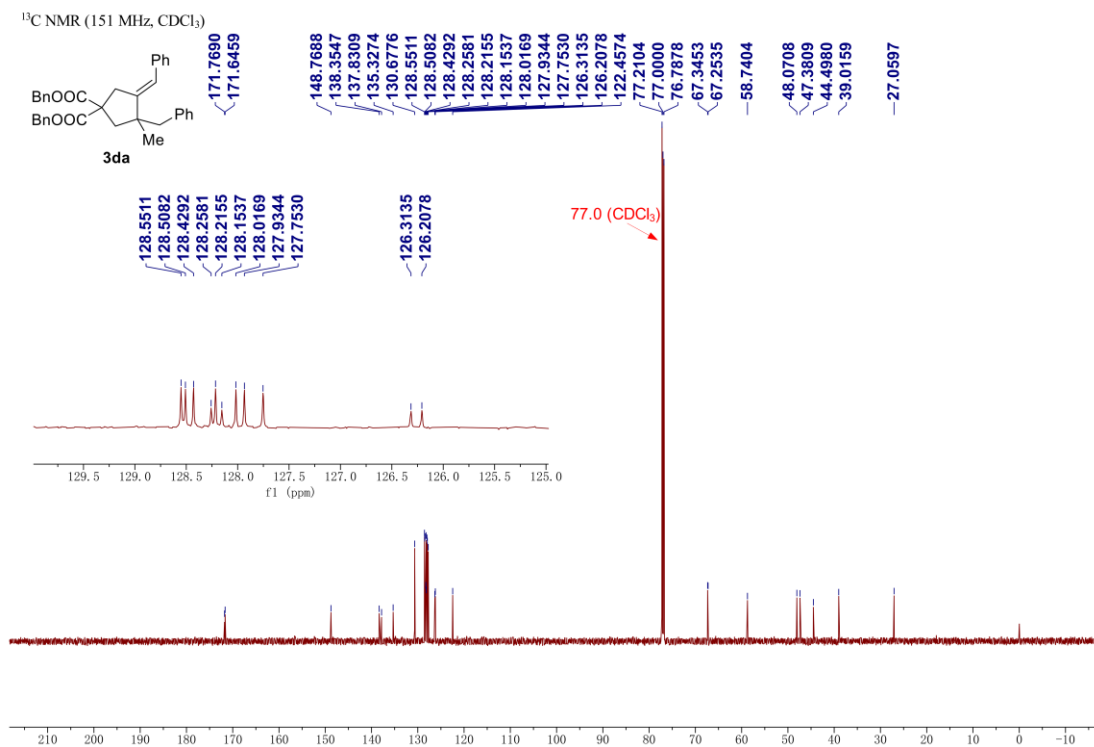

<sup>1</sup>H NMR (600 MHz, CDCl<sub>3</sub>)

7.3656  
7.3553  
7.3519  
7.3398  
7.2829  
7.2719  
7.2470  
7.2347  
7.2203  
7.1663  
7.1548  
6.1837  
6.1797  
6.1756  
4.5749  
4.5676  
4.5612  
4.5539  
4.5474  
4.5401  
4.5264  
4.5240  
4.5102  
4.5028  
4.4965  
4.4891  
4.4827  
4.4754  
4.4690  
4.4617  
4.4554  
4.4480  
4.4416  
4.4346  
4.4216  
4.4145  
4.4081  
4.4007  
4.3944  
4.3870  
3.3960  
3.3685  
3.1076  
3.1028  
3.0794  
3.0746  
2.7584  
2.6459  
2.6224  
2.3147  
2.2914  
1.9244

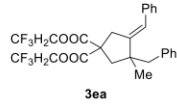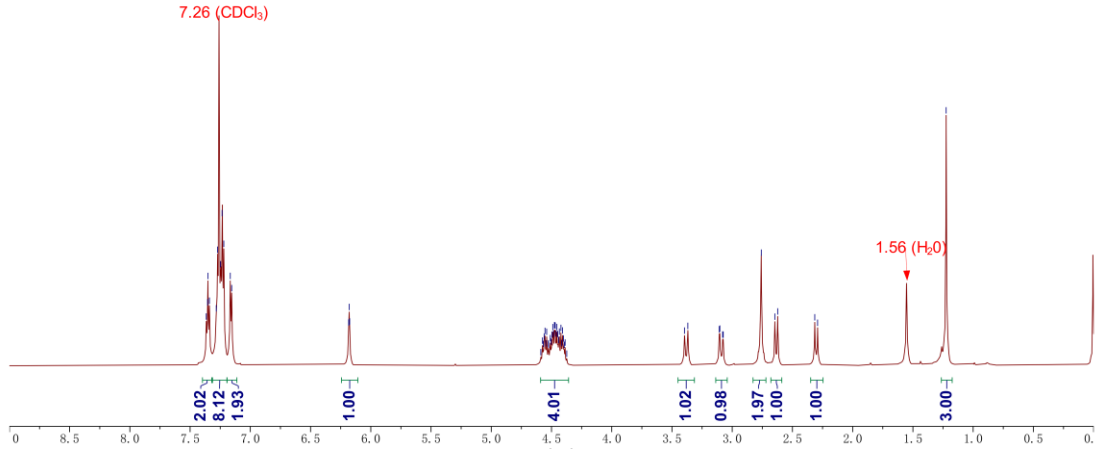

<sup>13</sup>C NMR (151 MHz, CDCl<sub>3</sub>)

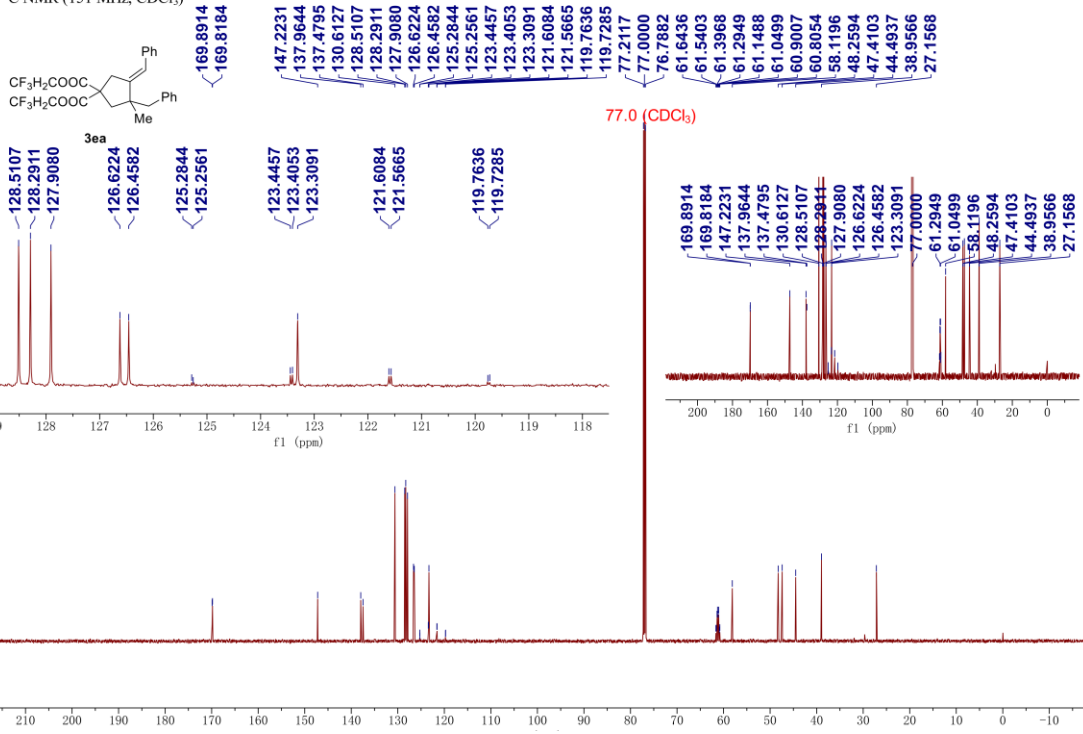

<sup>19</sup>F NMR (565 MHz, CDCl<sub>3</sub>)

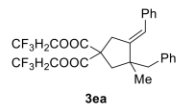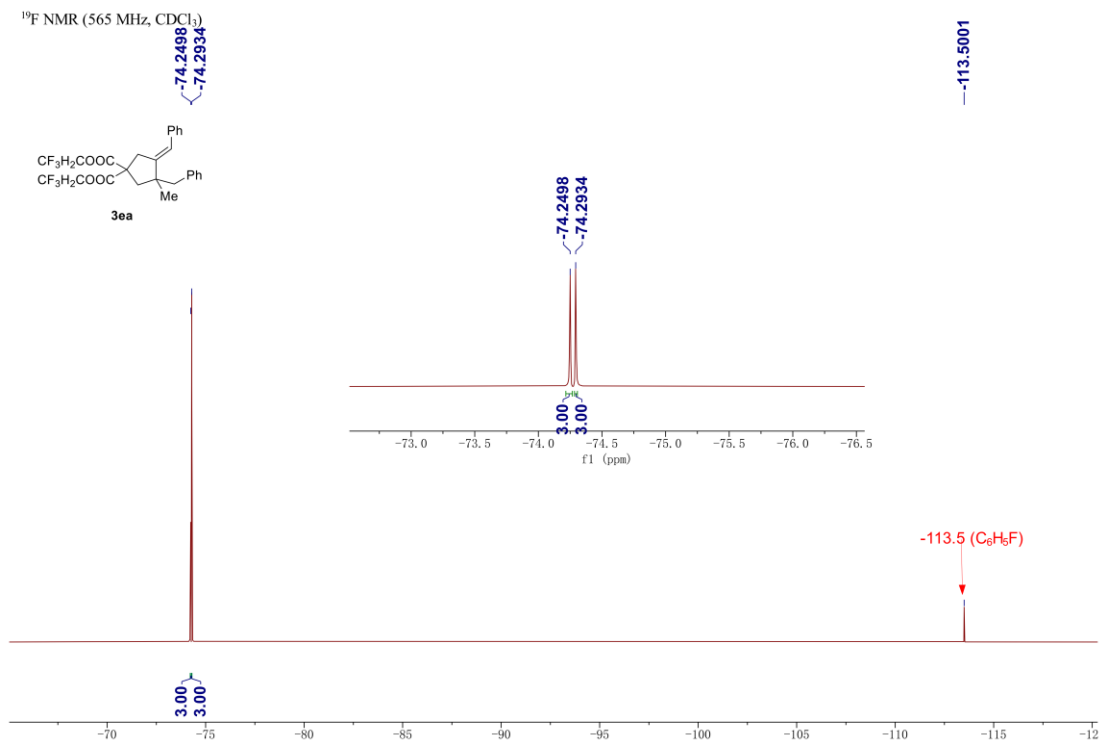

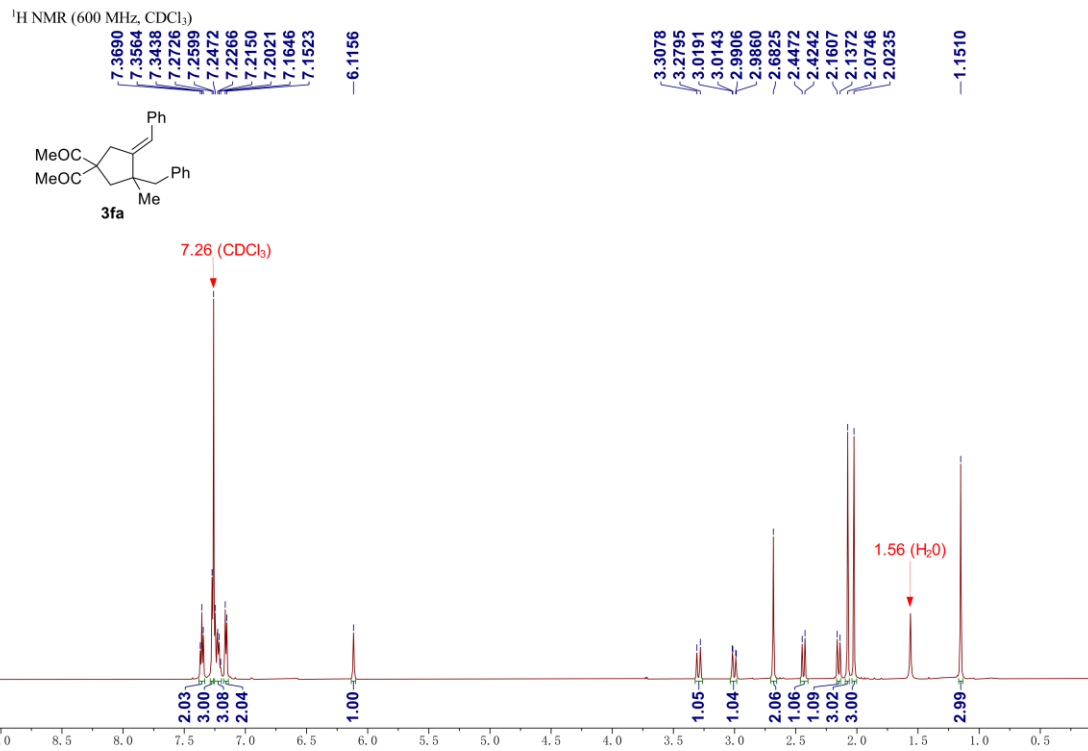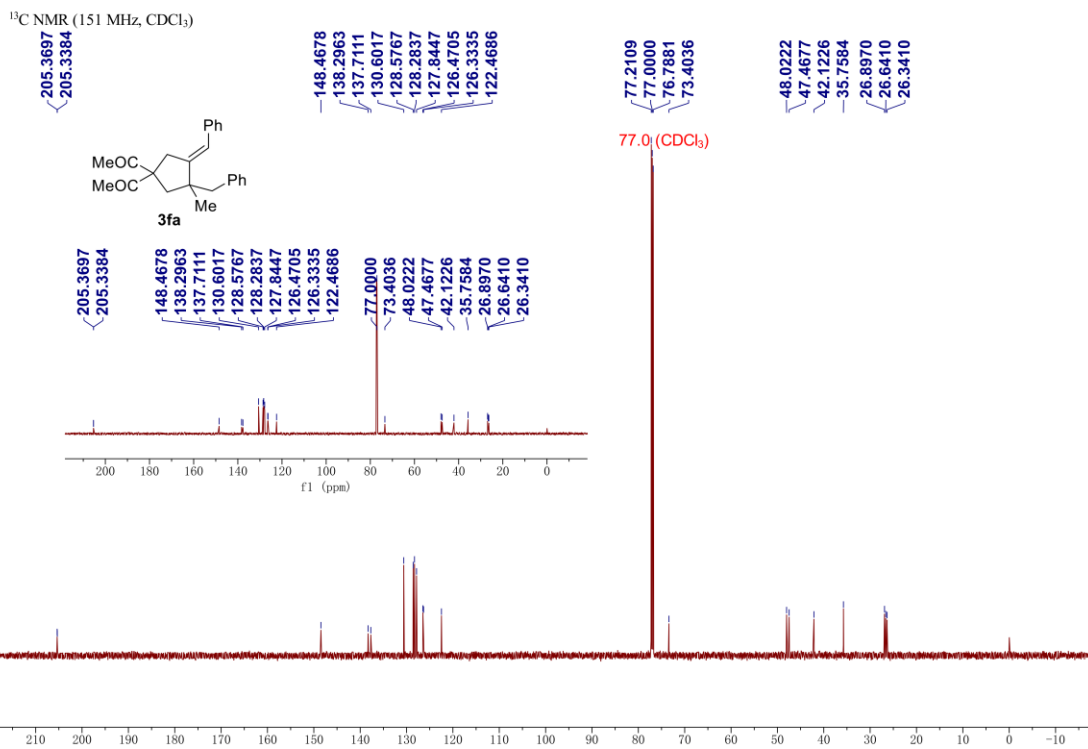



<sup>1</sup>H NMR (500 MHz, Chloroform-*d*)

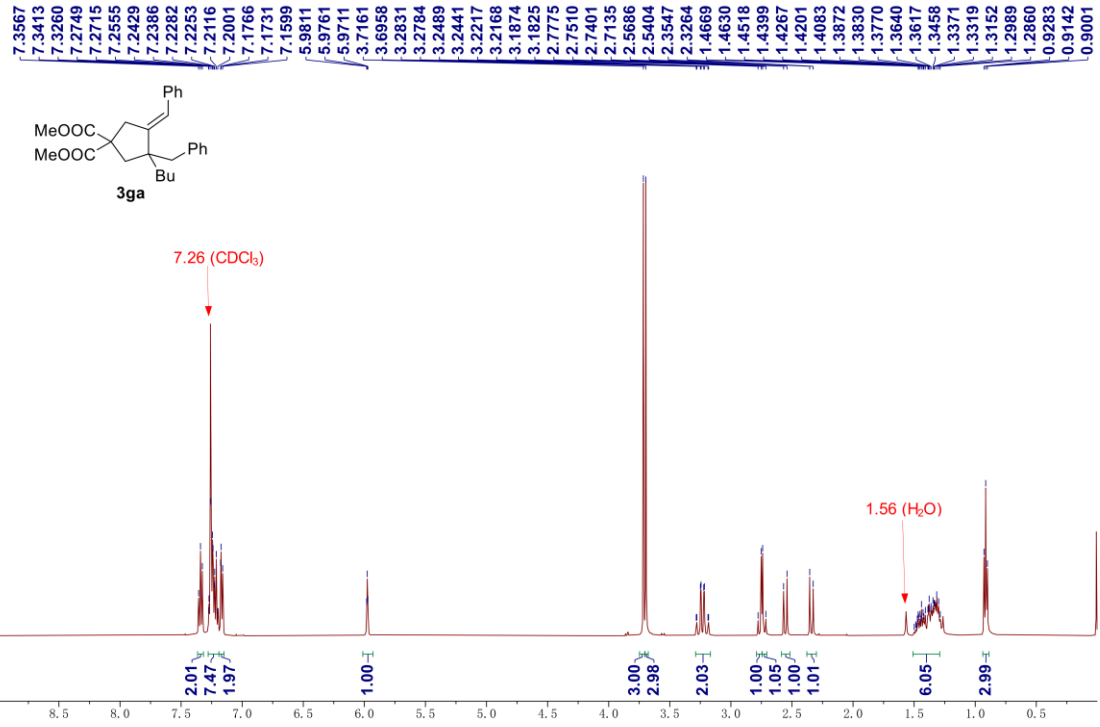

<sup>13</sup>C NMR (126 MHz, CDCl<sub>3</sub>)

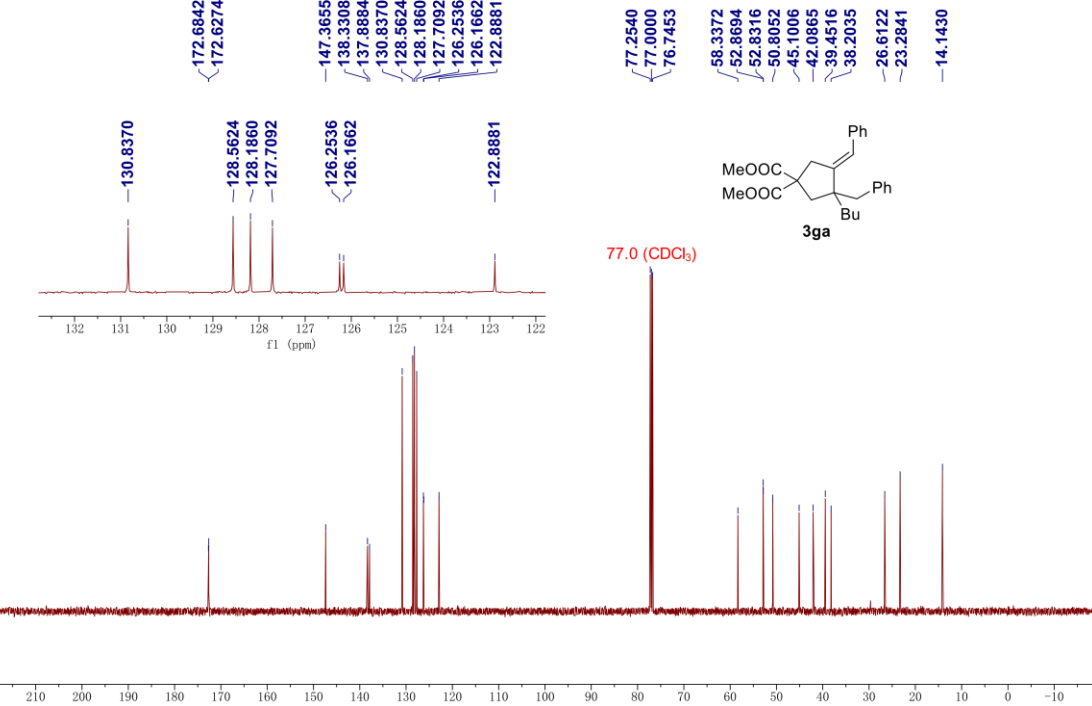

<sup>1</sup>H NMR (600 MHz, CDCl<sub>3</sub>)

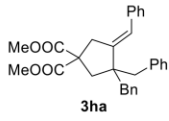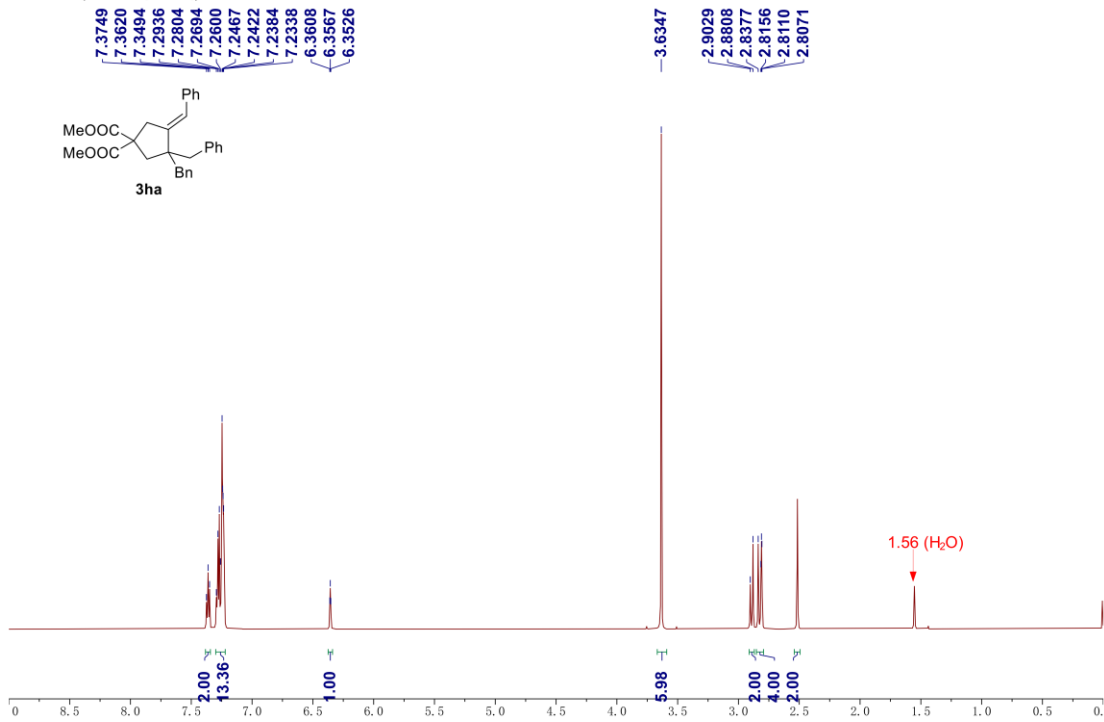

<sup>13</sup>C NMR (151 MHz, Chloroform-*d*)

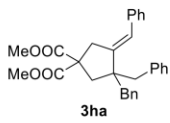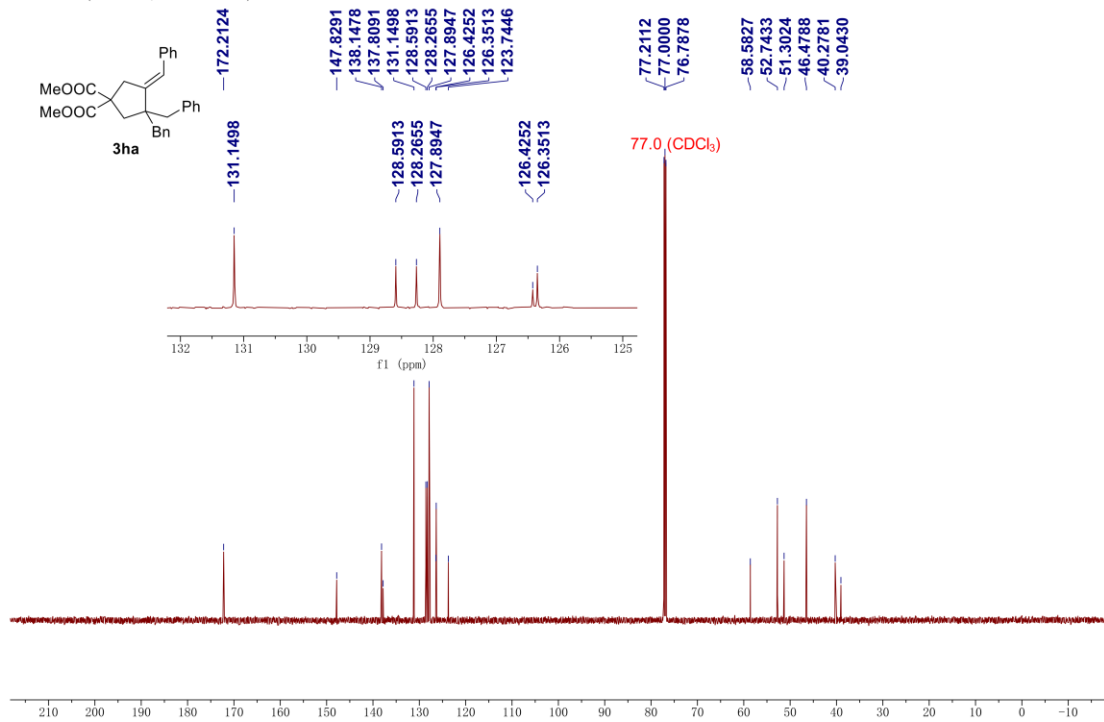

<sup>1</sup>H NMR (600 MHz, CDCl<sub>3</sub>)

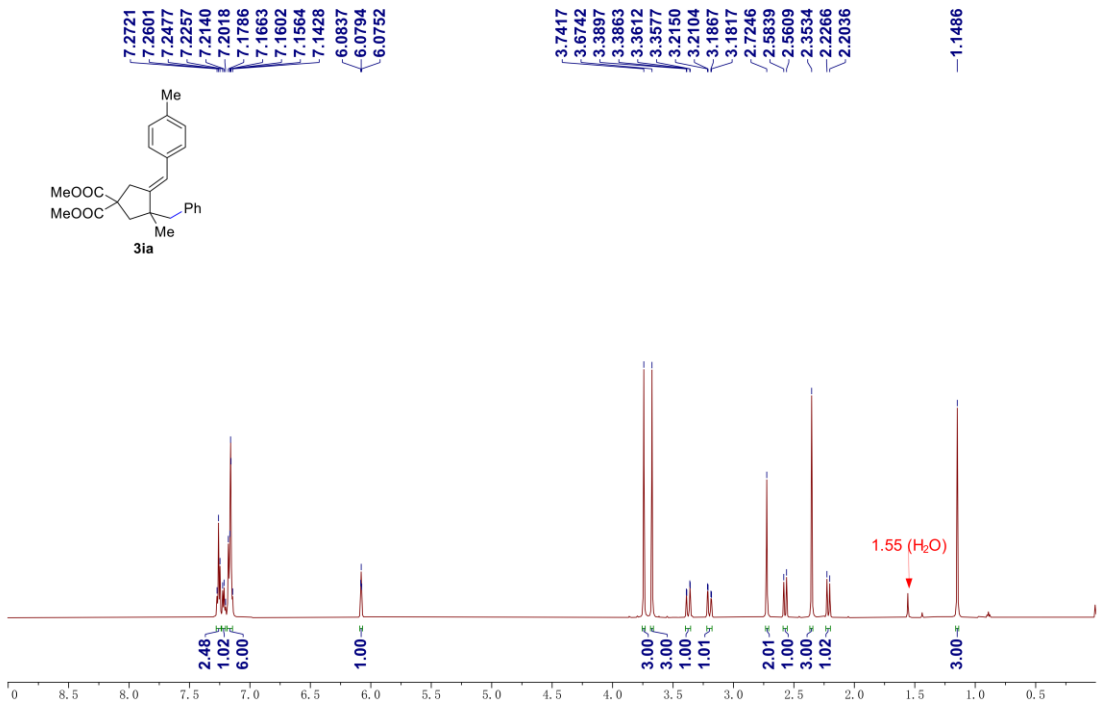

<sup>13</sup>C NMR (151 MHz, CDCl<sub>3</sub>)

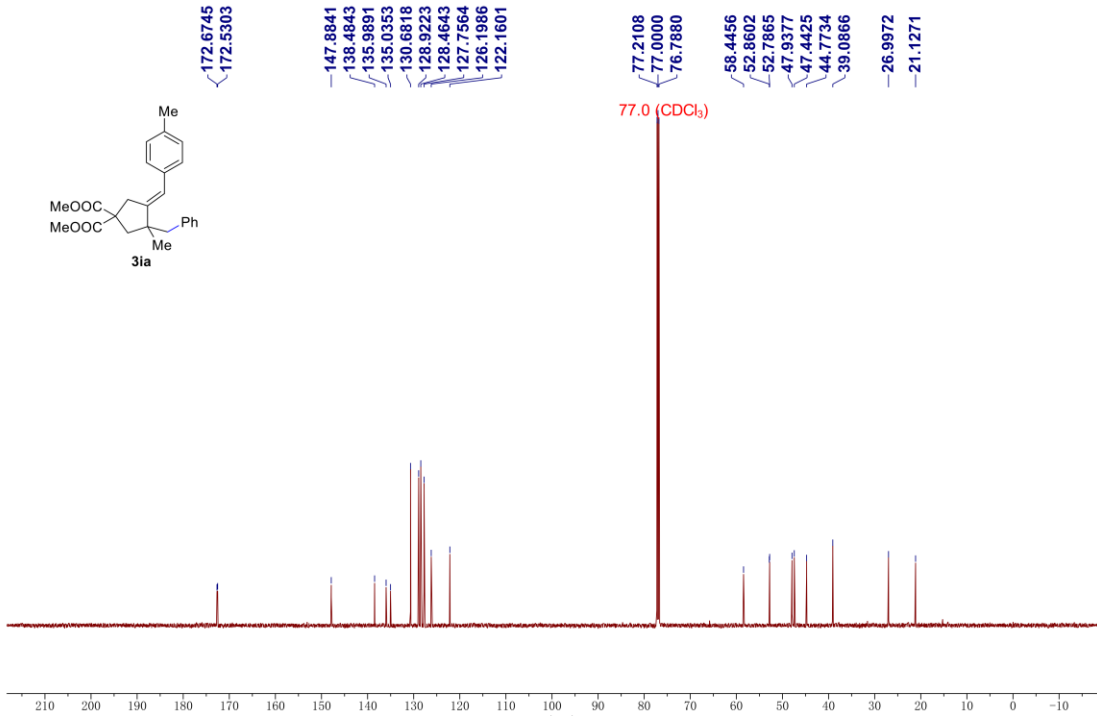

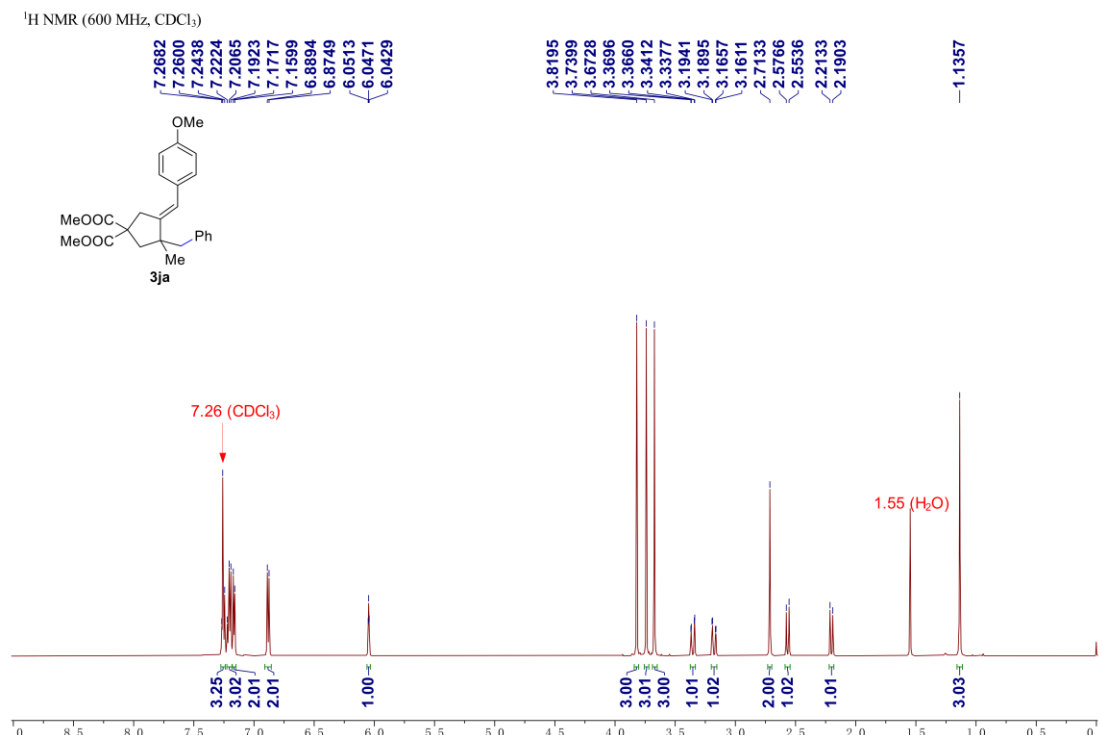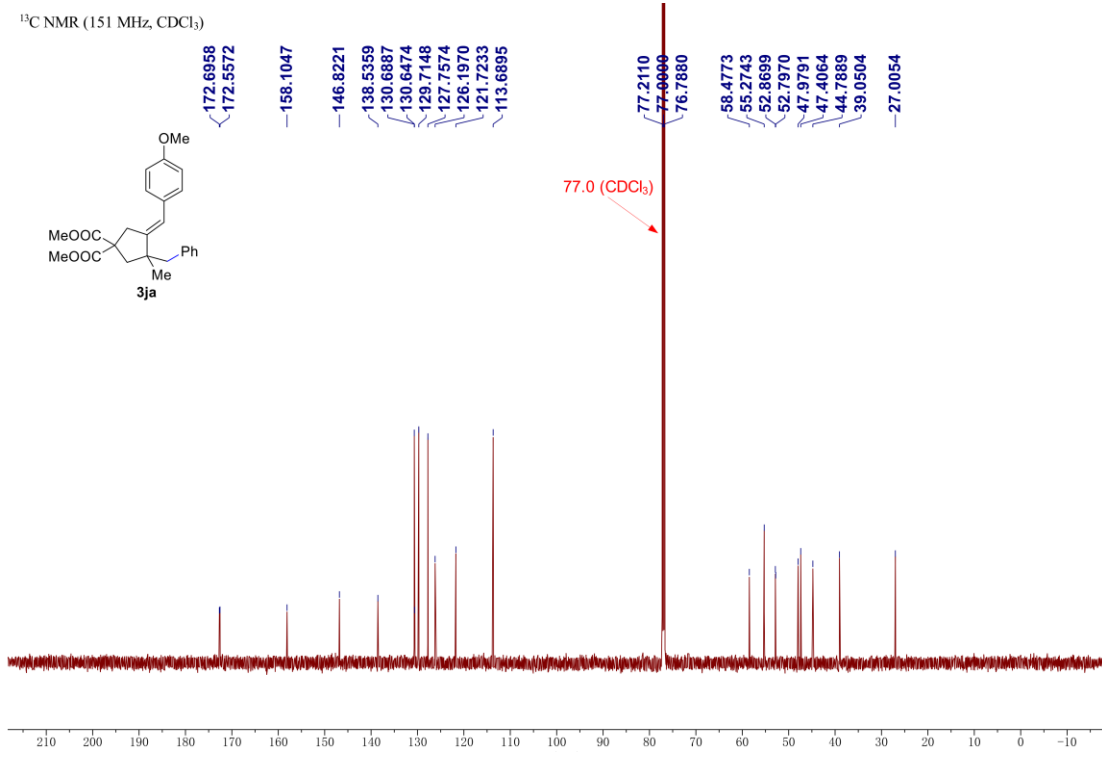

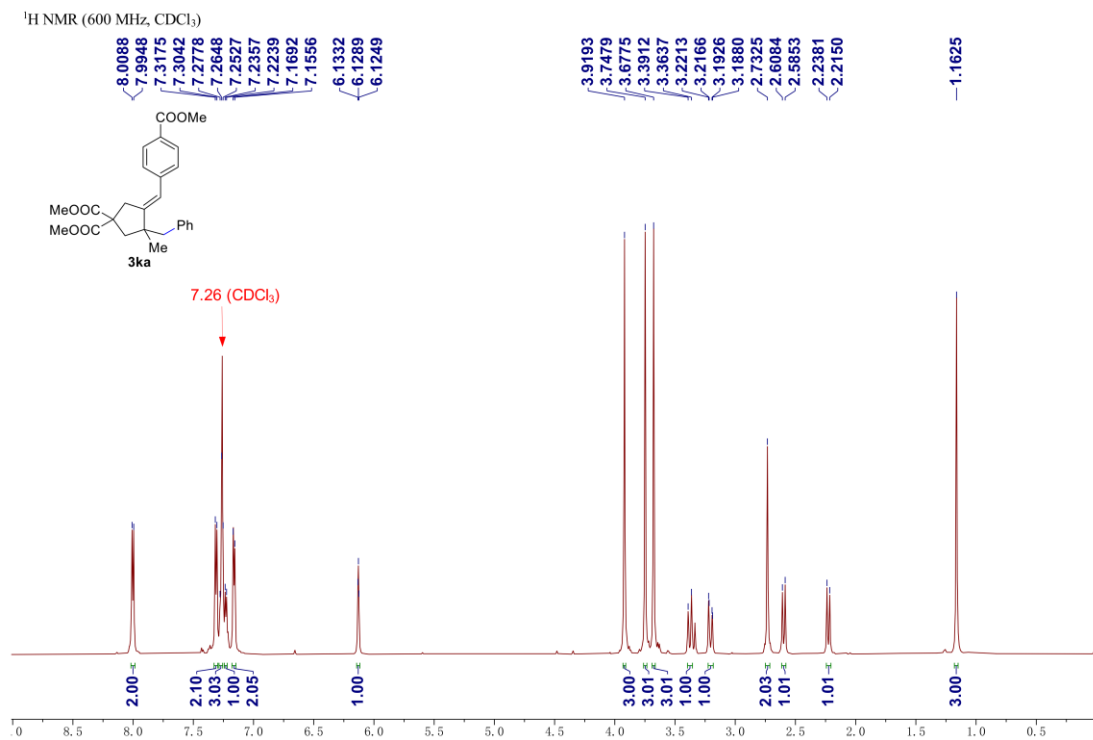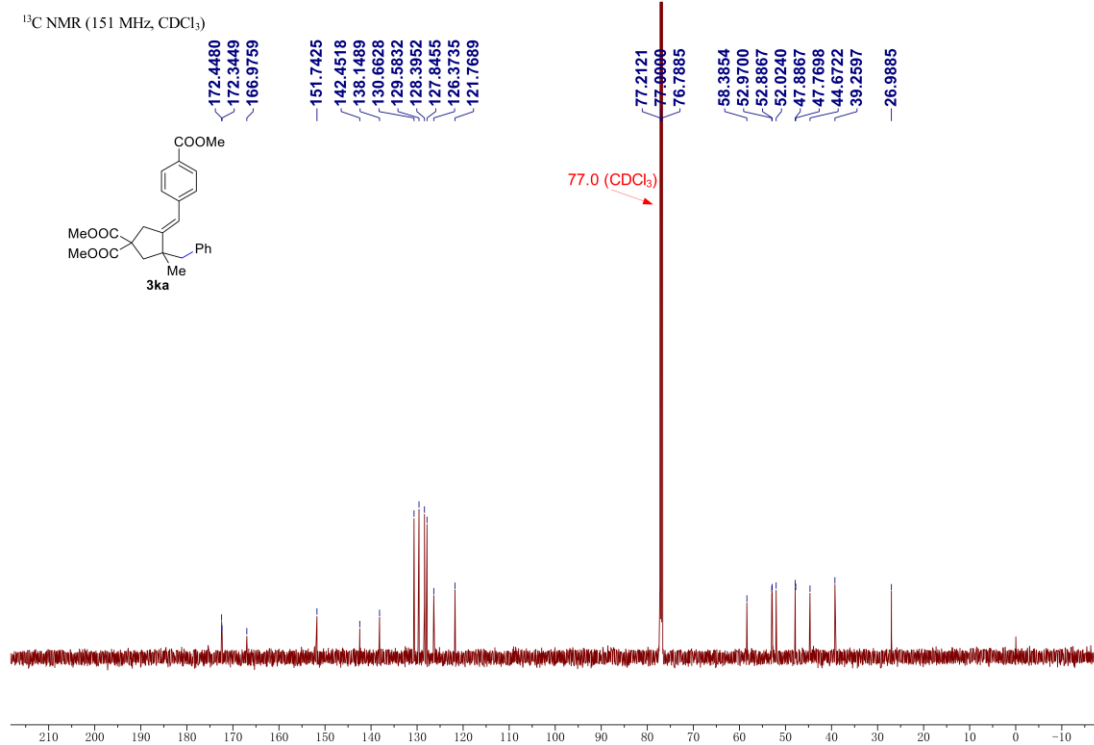

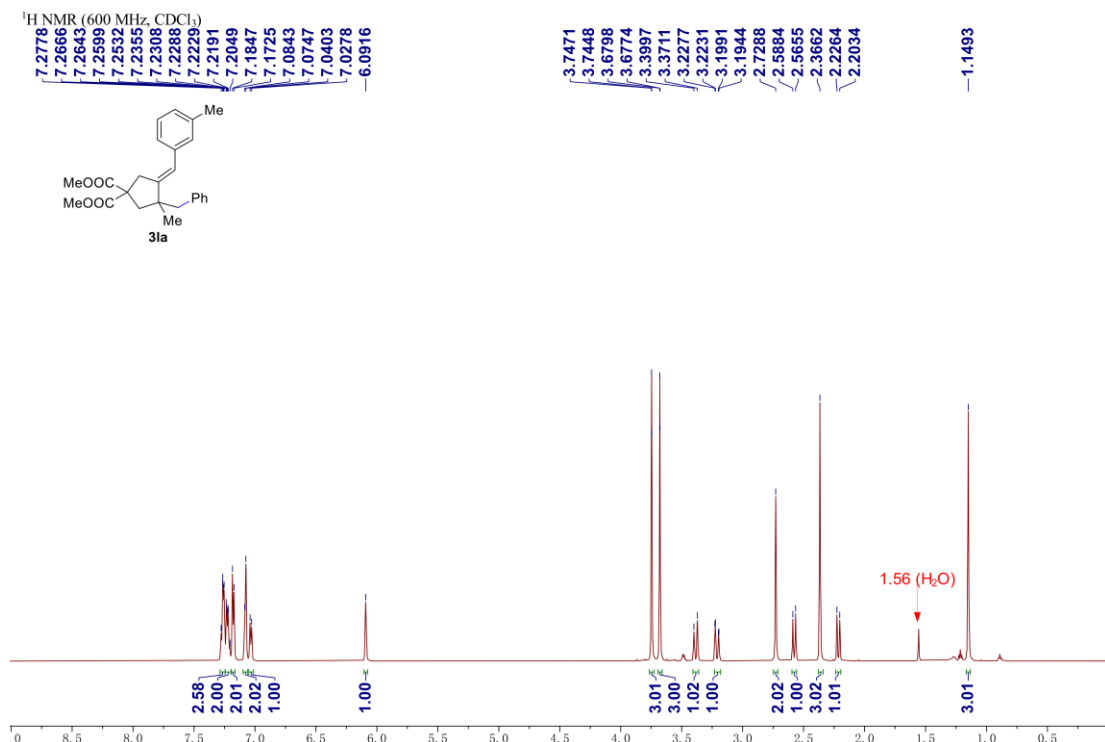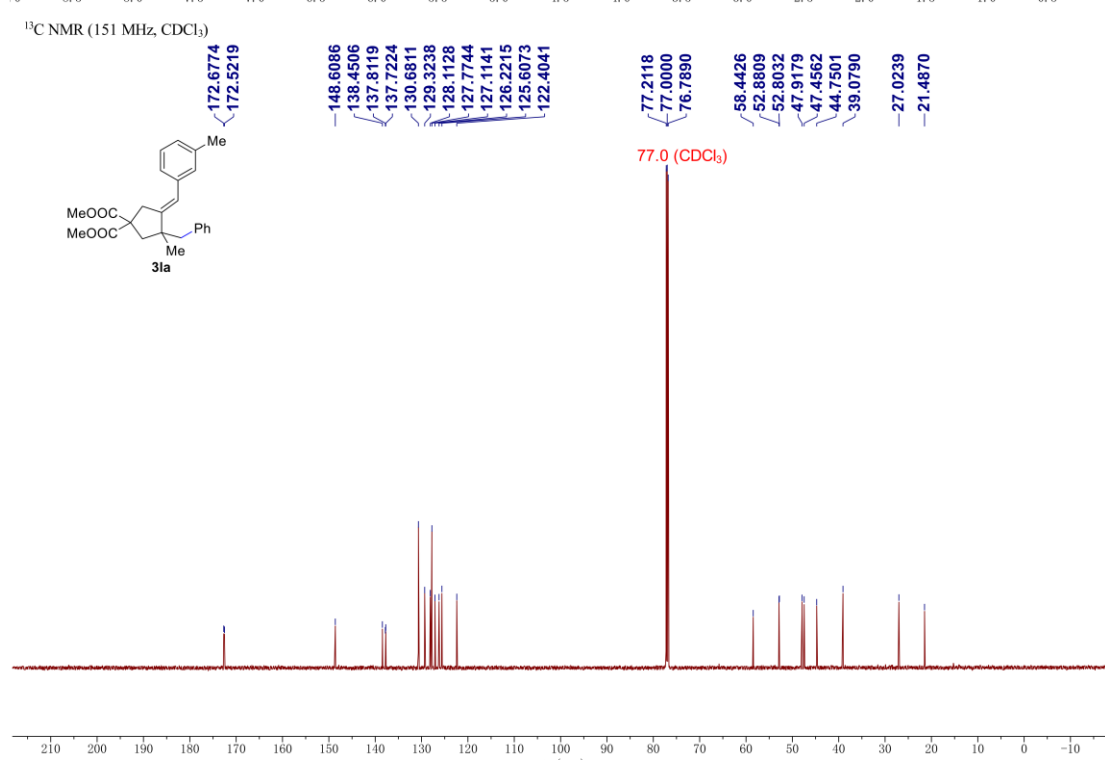

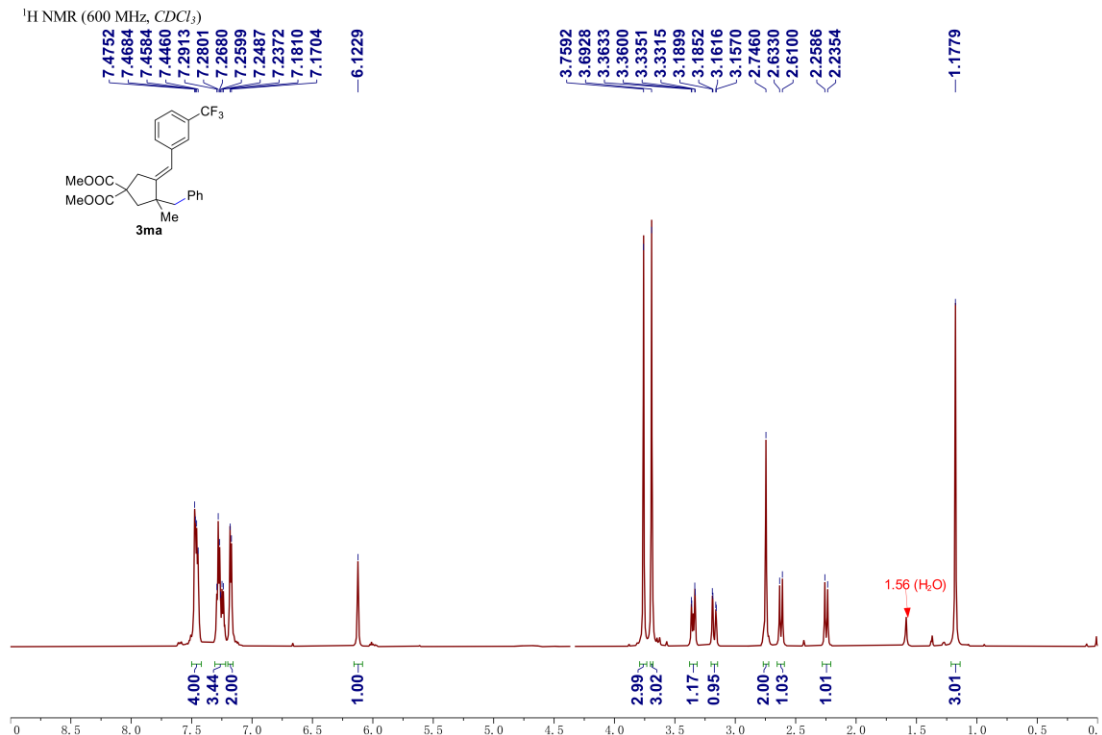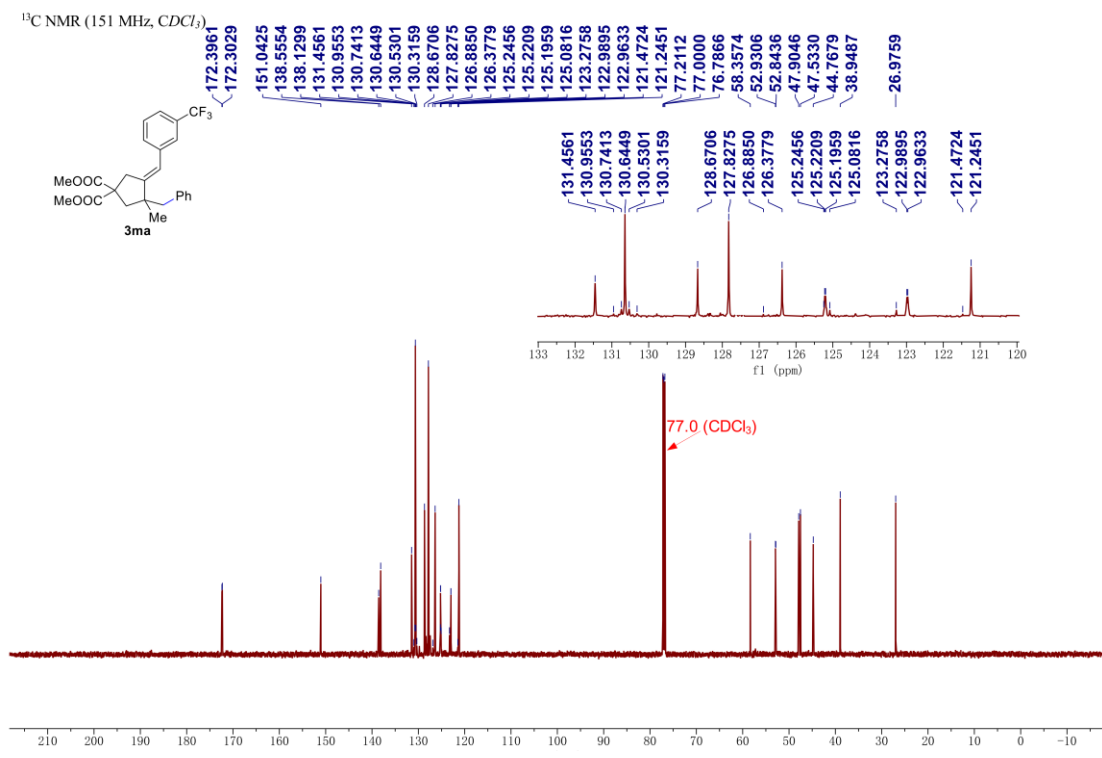

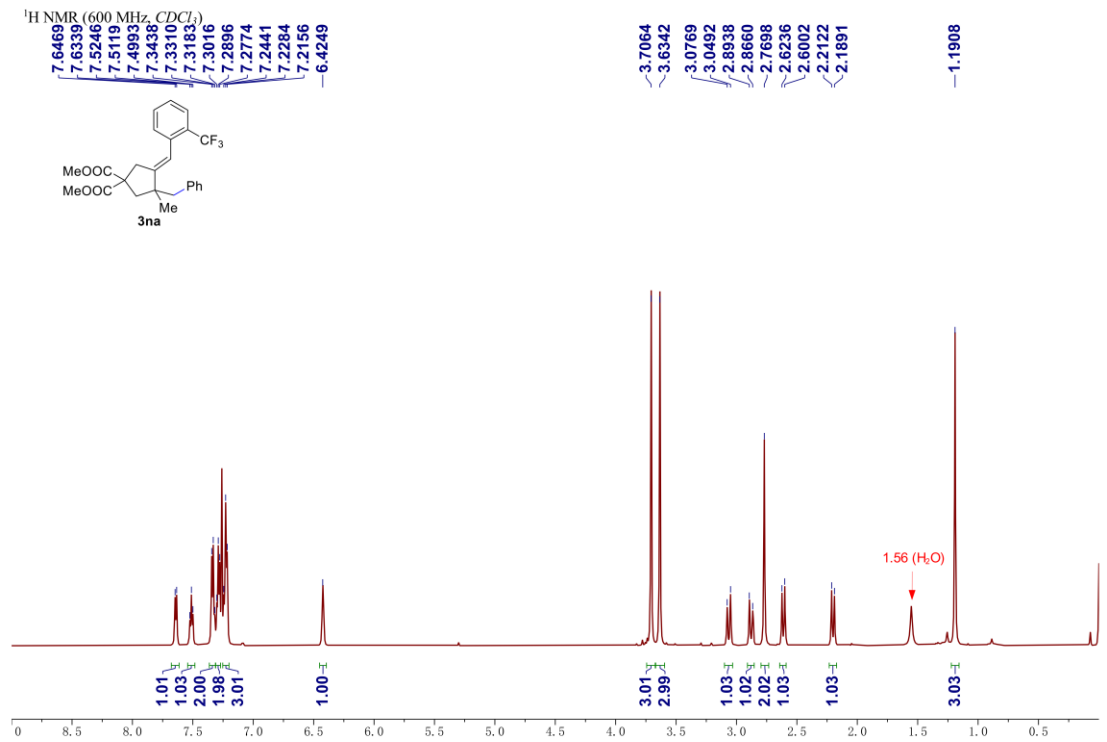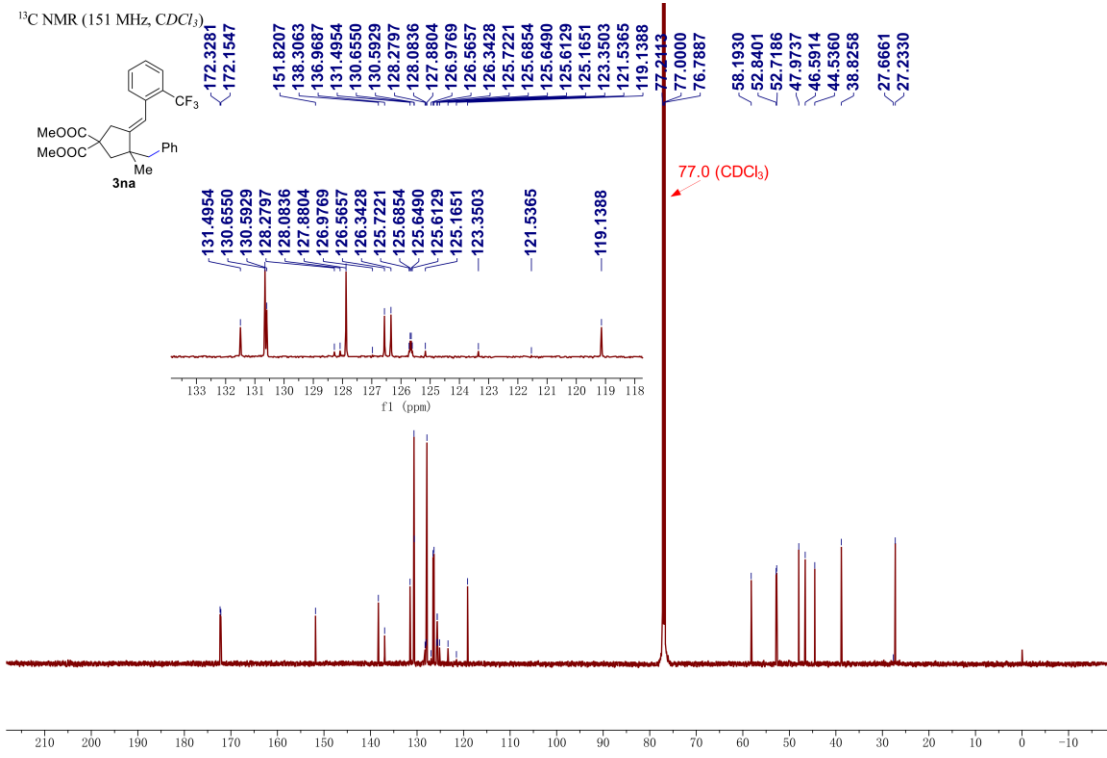



<sup>1</sup>H NMR (600 MHz, CDCl<sub>3</sub>)

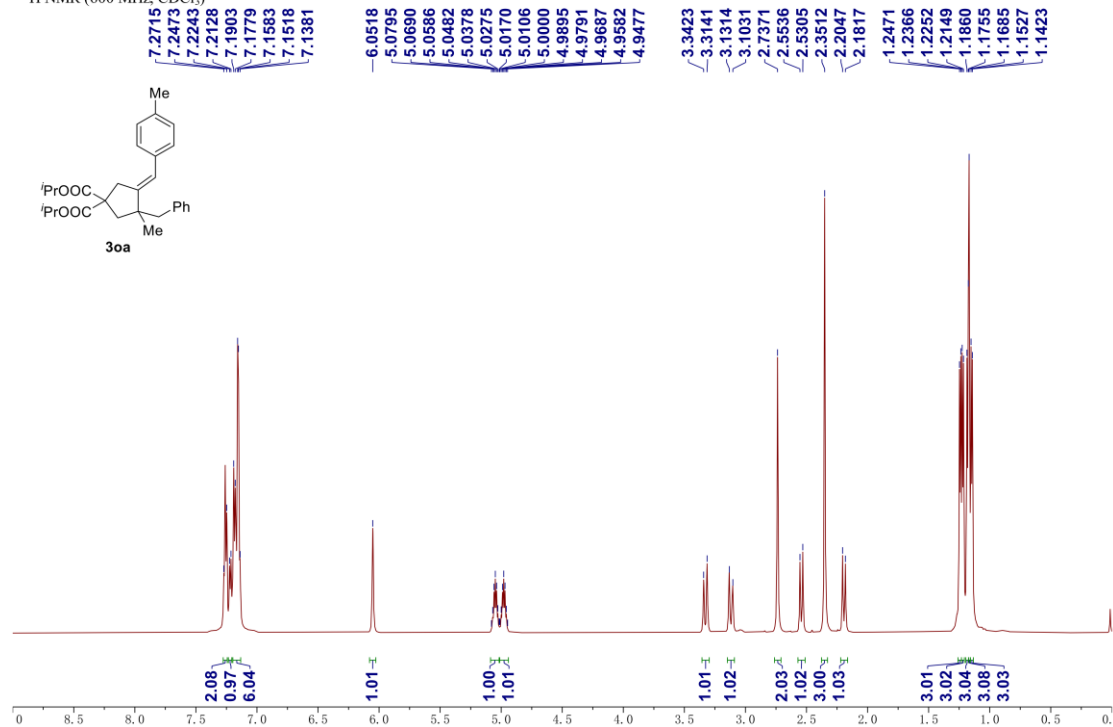

<sup>13</sup>C NMR (151 MHz, CDCl<sub>3</sub>)

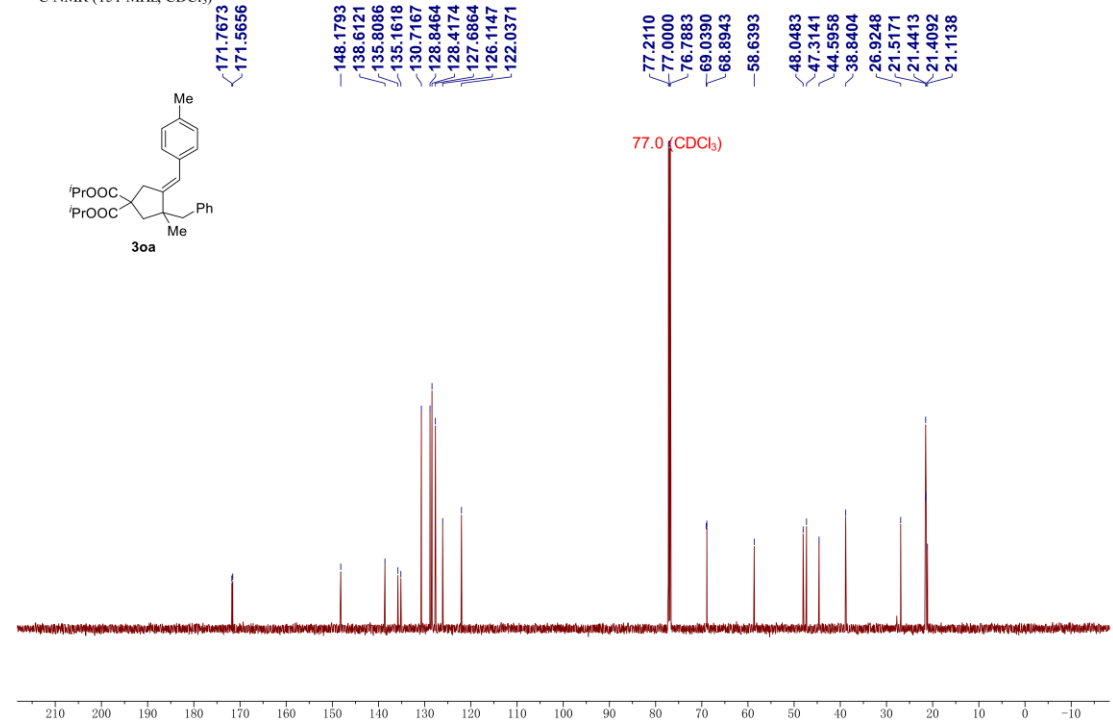

<sup>1</sup>H NMR (600 MHz, CDCl<sub>3</sub>)

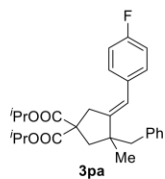

7.2736, 7.2591, 7.2493, 7.2280, 7.2166, 7.2102, 7.2051, 7.1960, 7.1774, 7.1660, 7.0320, 7.0174, 7.0032, 6.0285, 5.0753, 5.0649, 5.0544, 5.0440, 5.0336, 5.0232, 5.0128, 5.0059, 4.9954, 4.9850, 4.9746, 4.9641, 4.9538, 4.9433, 3.2803, 3.2523, 3.0775, 3.0728, 3.0494, 3.0448, 2.7290, 2.5563, 2.5333, 2.2015, 2.1784, 1.2422, 1.2318, 1.2187, 1.2082, 1.1793, 1.1688, 1.1653, 1.1391, 1.1287

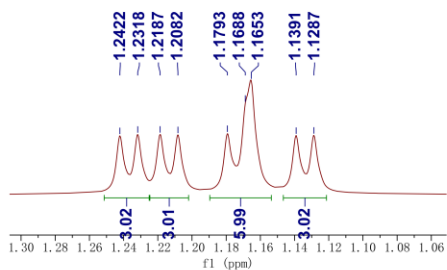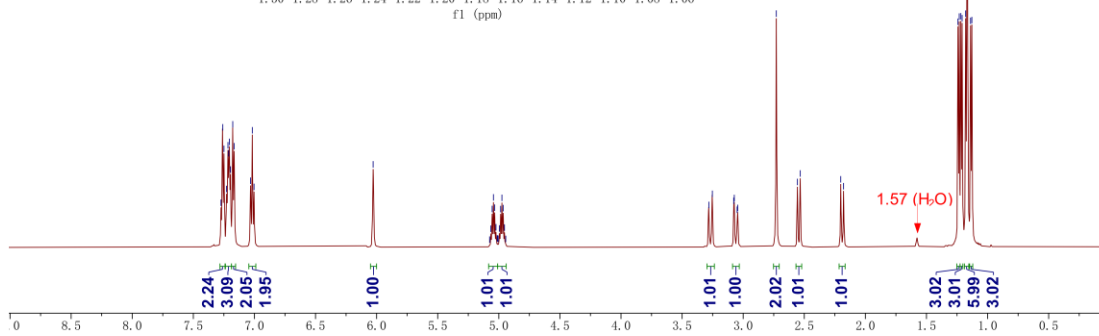

<sup>13</sup>C NMR (151 MHz, CDCl<sub>3</sub>)

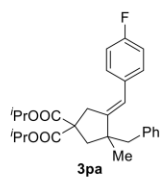

171.6282, 171.4659, 162.1102, 160.4820, 148.9499, 138.4716, 134.0833, 134.0614, 130.6966, 130.0032, 129.9521, 127.7241, 126.2044, 121.1384, 115.0725, 114.9316

77.0 (CDCl<sub>3</sub>)

77.2113, 77.0000, 76.7880, 69.1340, 68.9717, 58.5974, 48.0642, 47.2654, 44.5567, 38.7281, 26.9010, 21.5111, 21.4310, 21.3940

210, 200, 190, 180, 170, 160, 150, 140, 130, 120, 110, 100, 90, 80, 70, 60, 50, 40, 30, 20, 10, 0, -10

<sup>1</sup>H NMR (600 MHz, CDCl<sub>3</sub>)

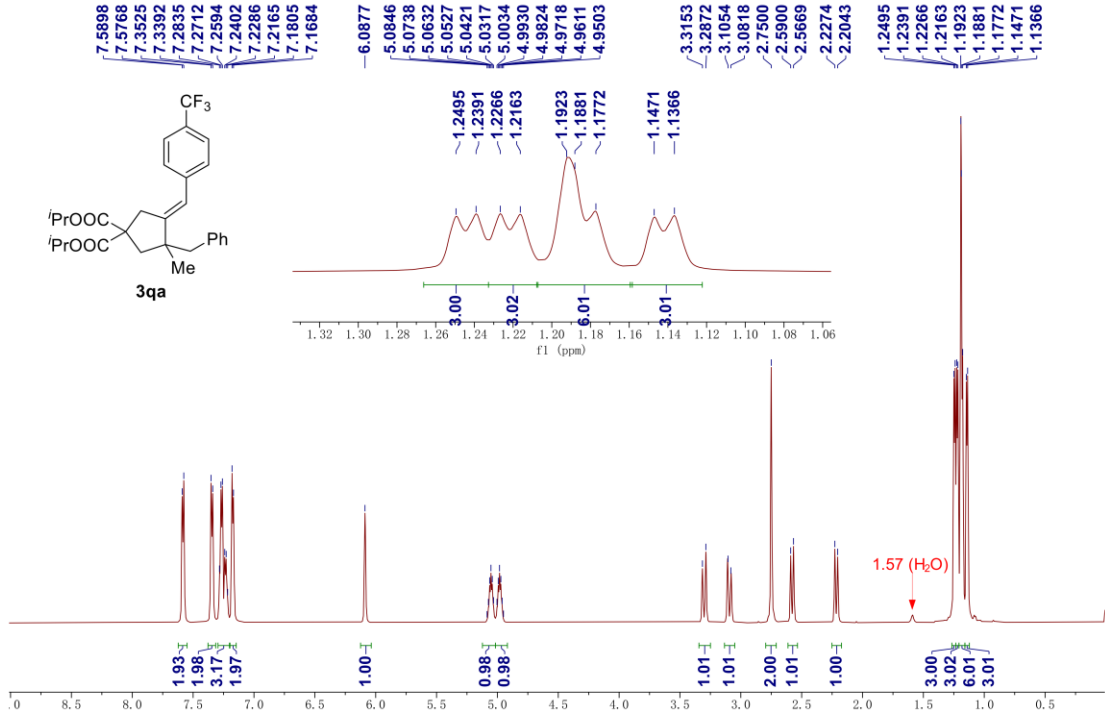

<sup>13</sup>C NMR (151 MHz, CDCl<sub>3</sub>)

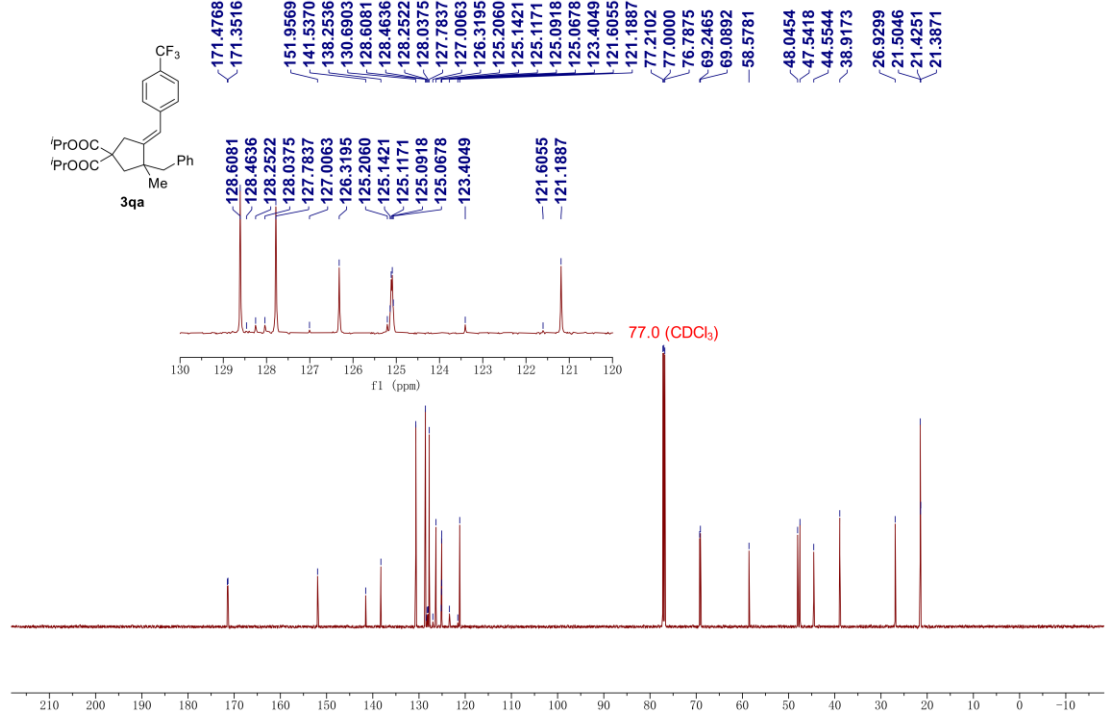

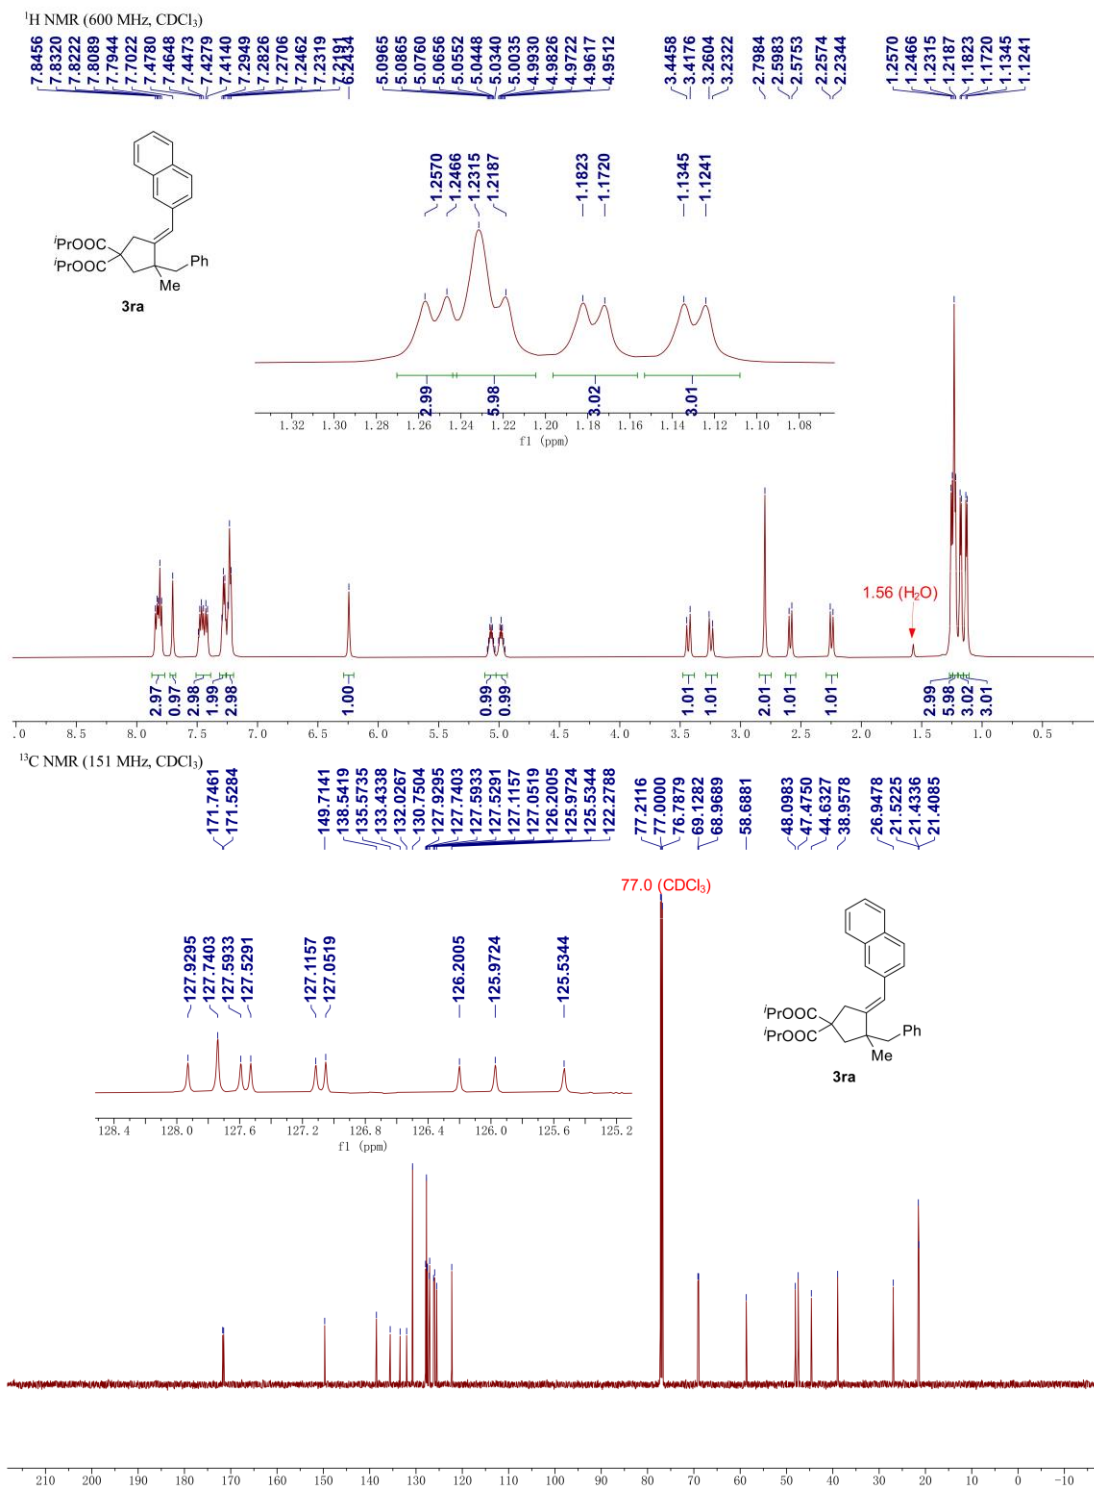

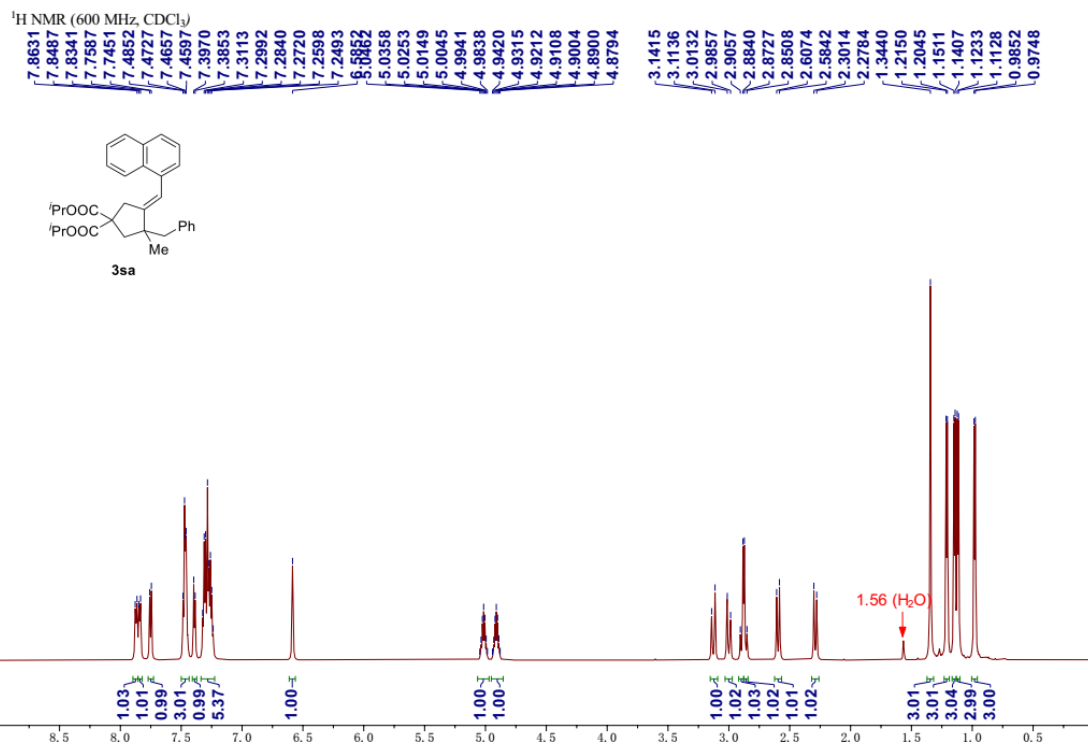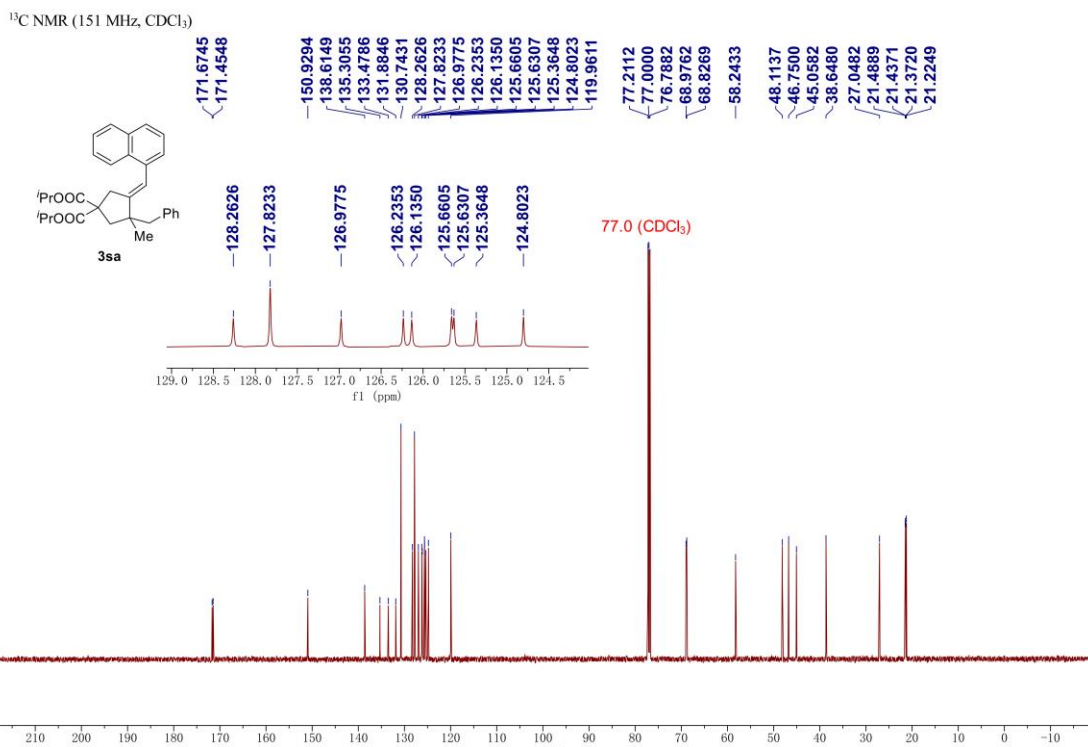

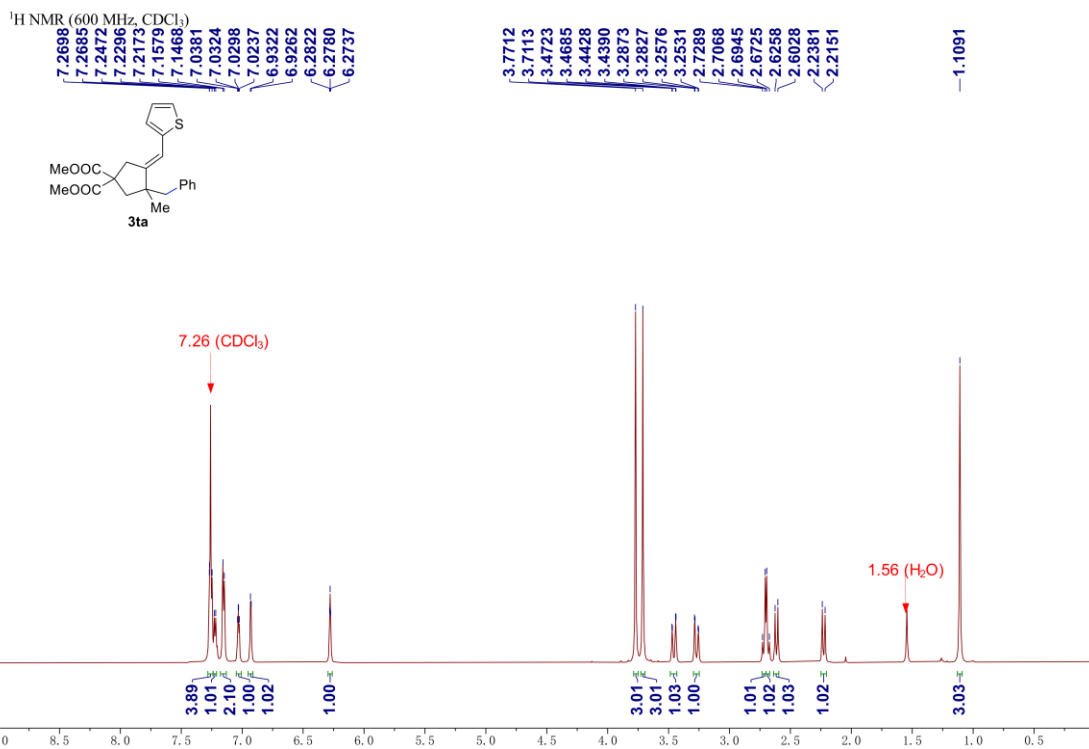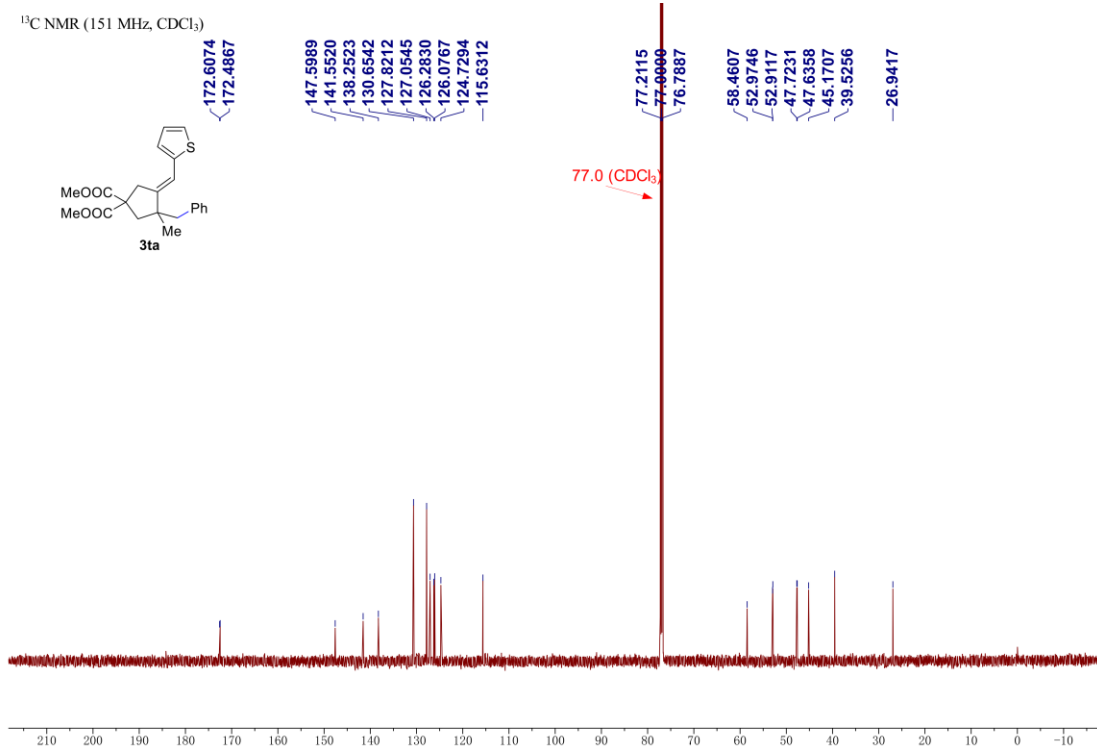

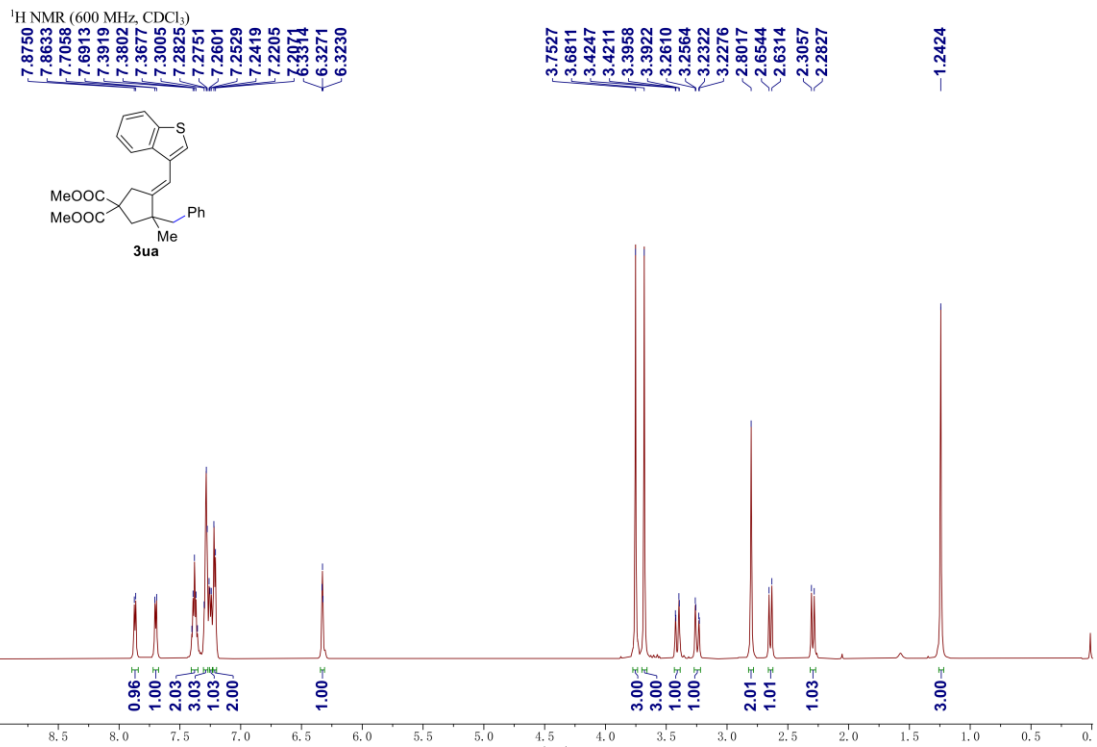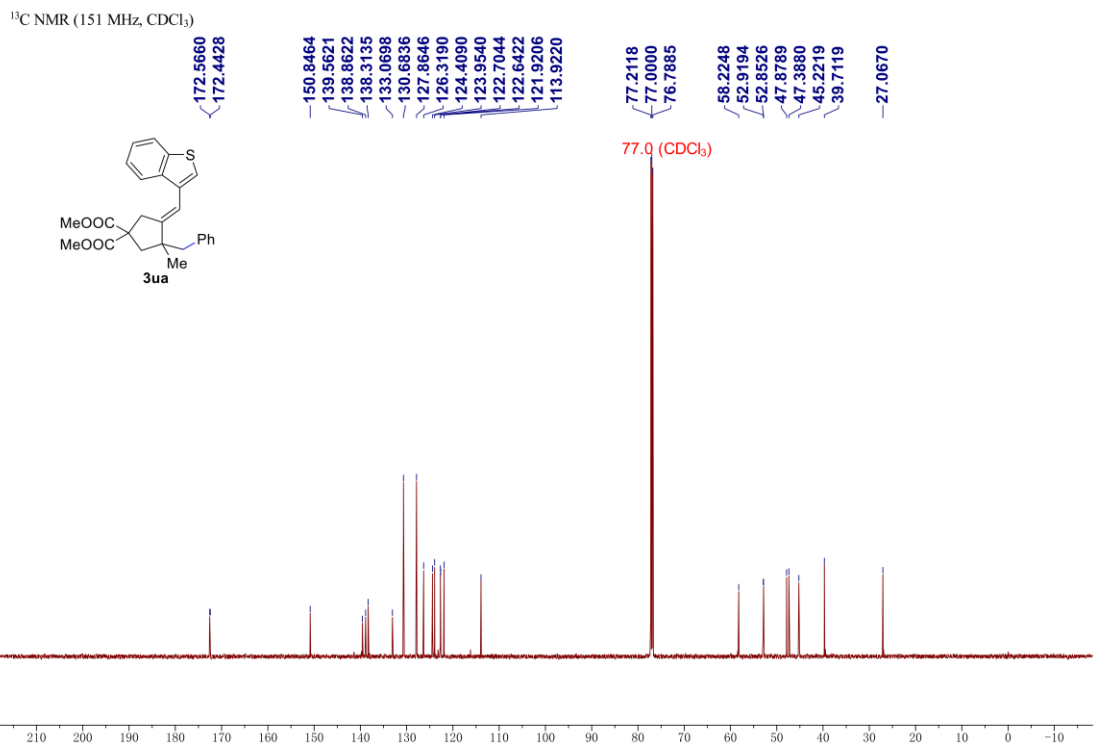

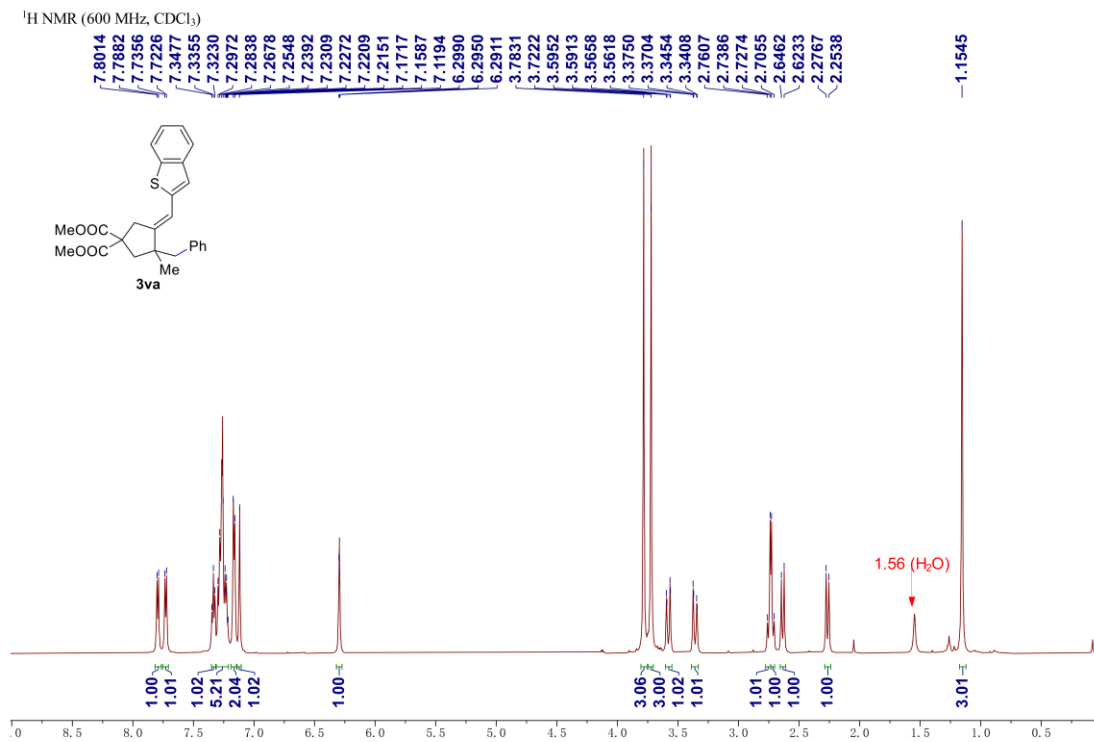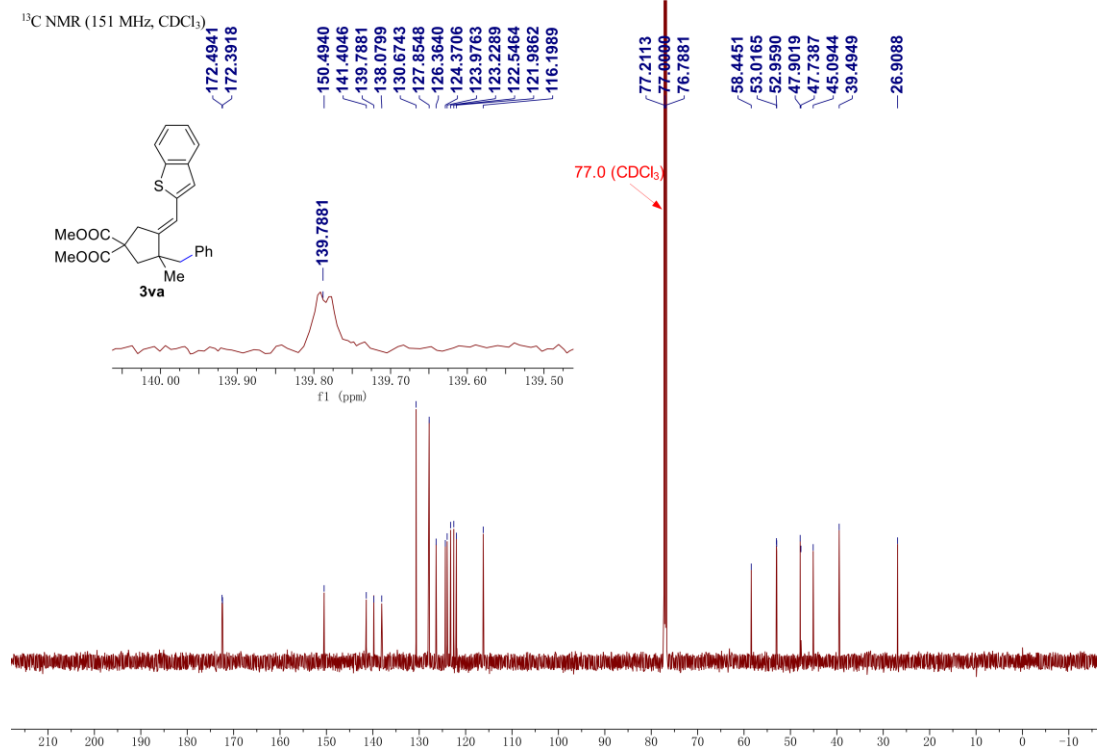



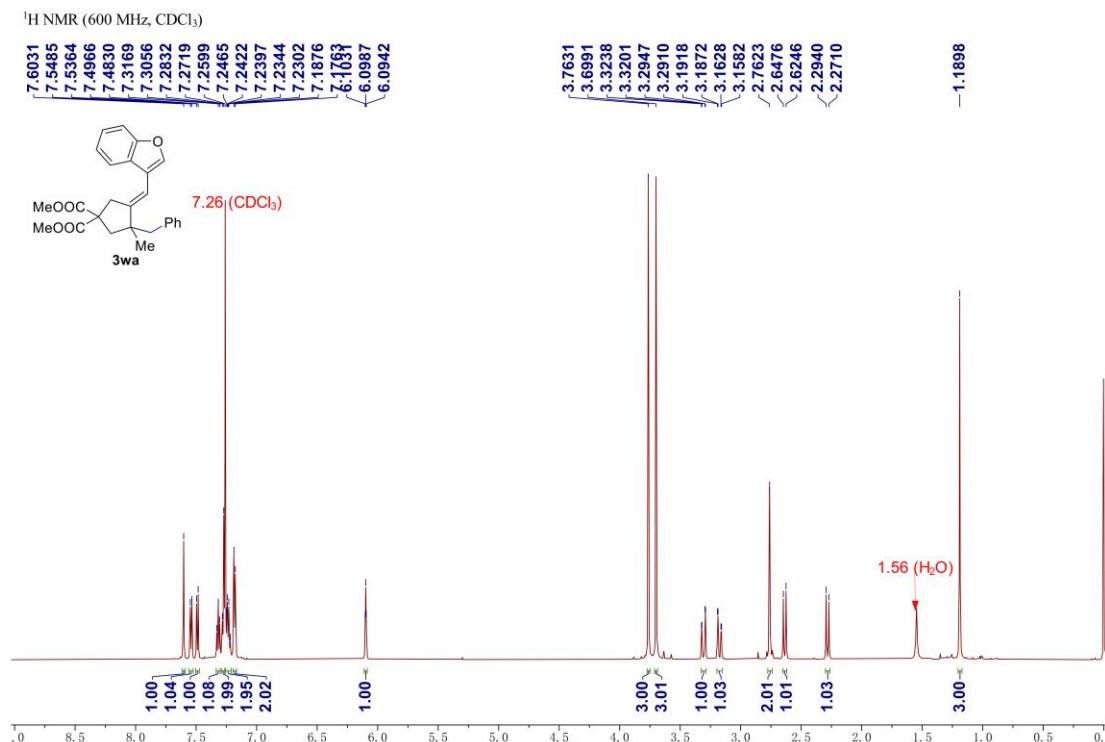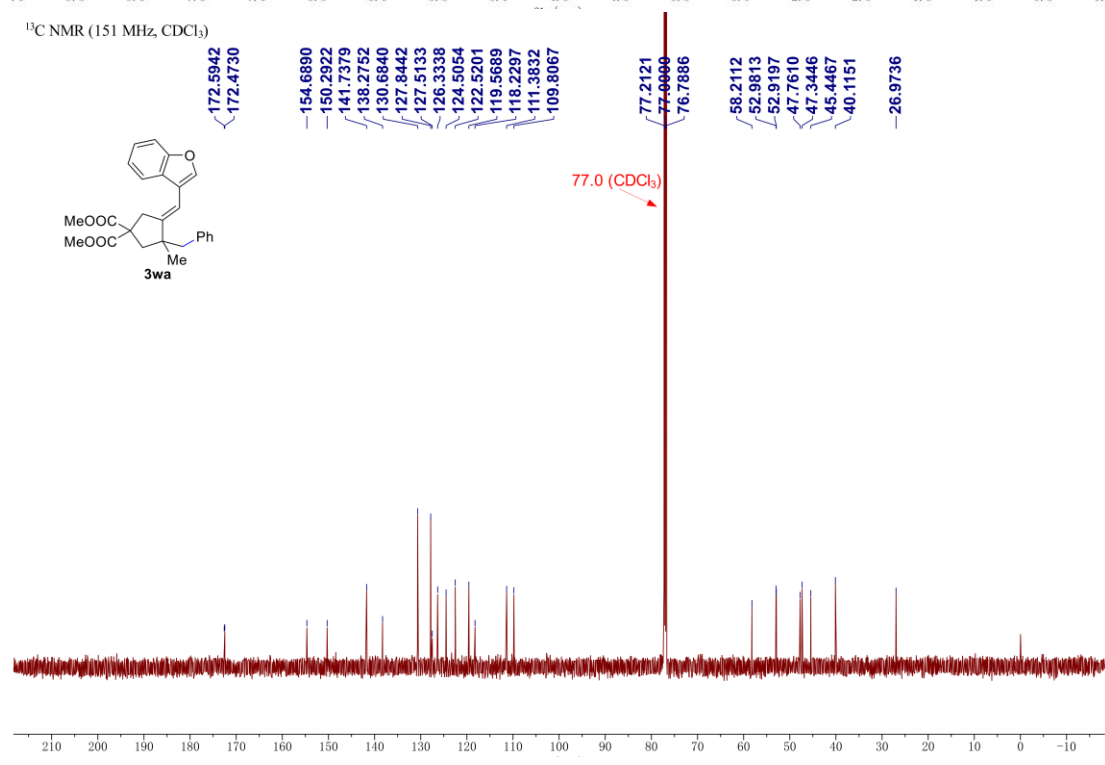

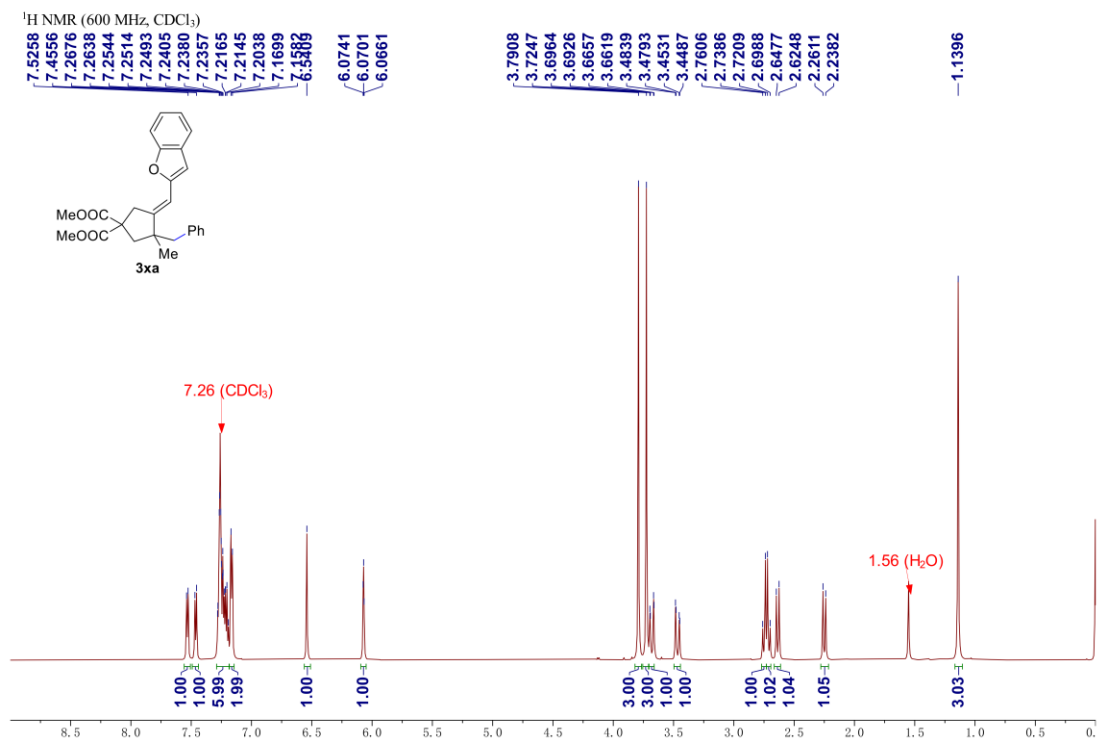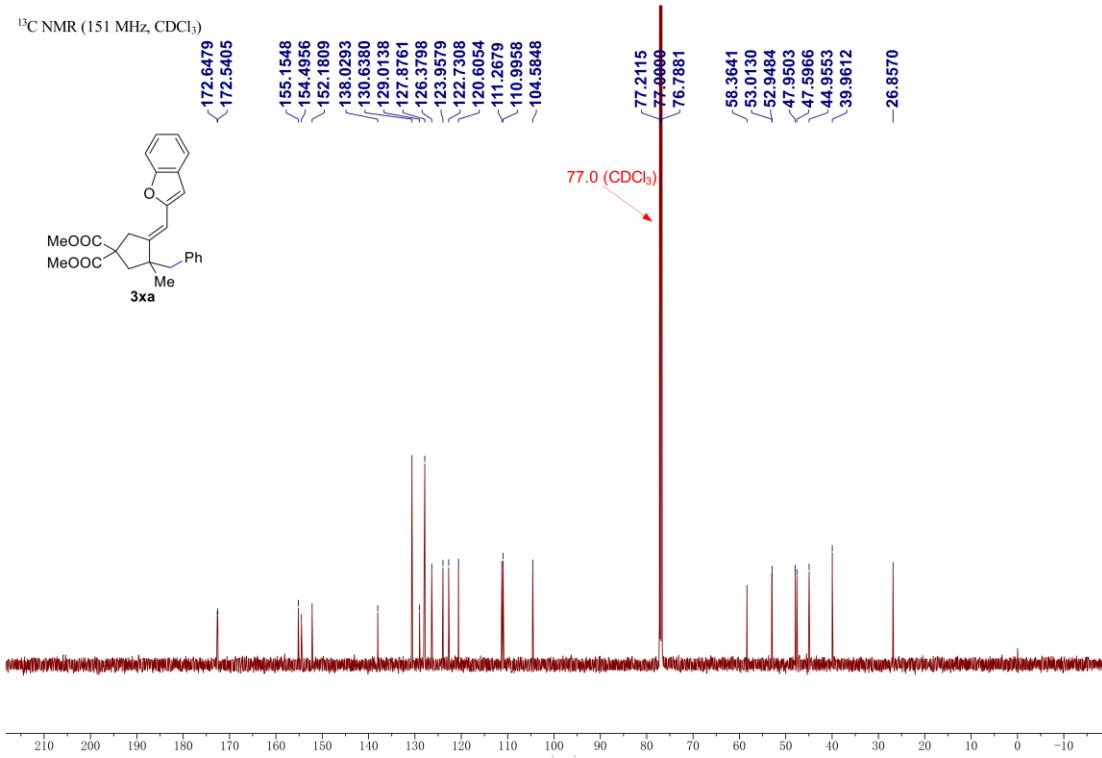

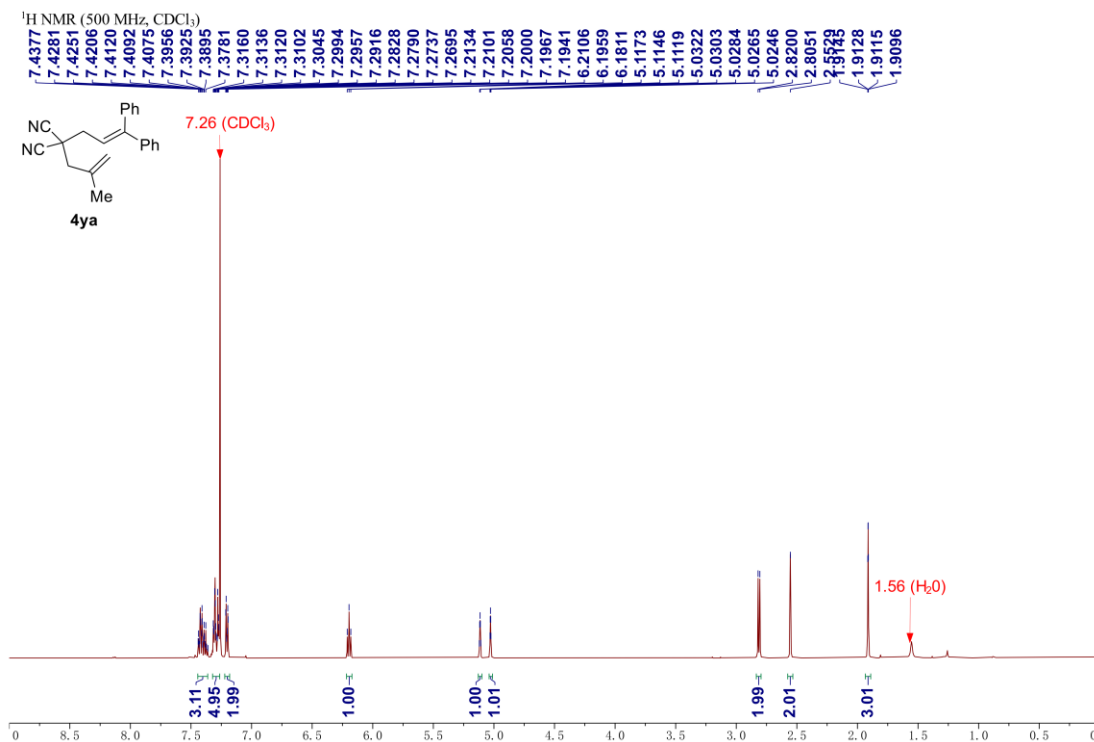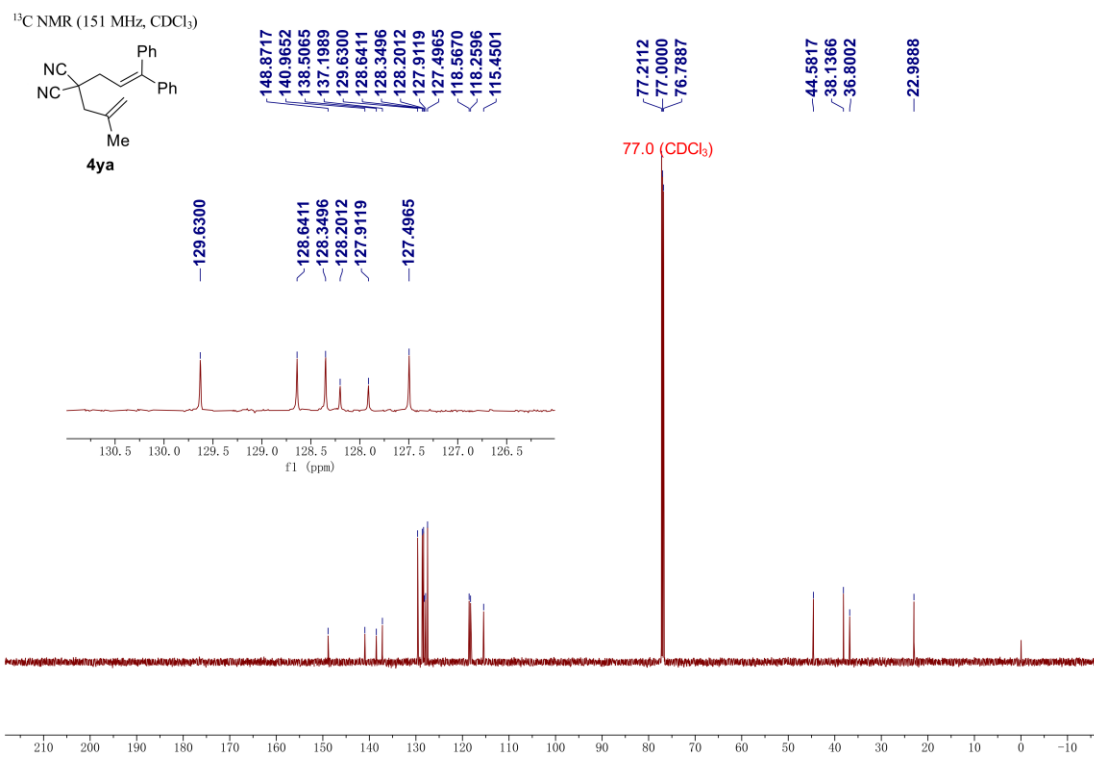

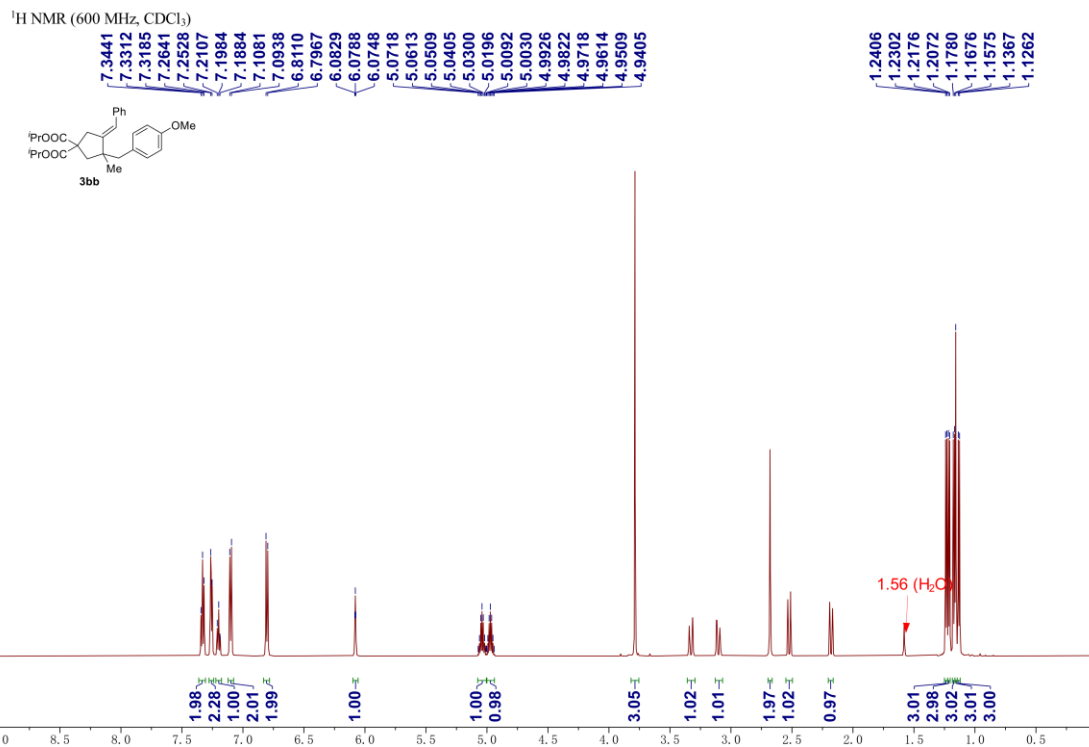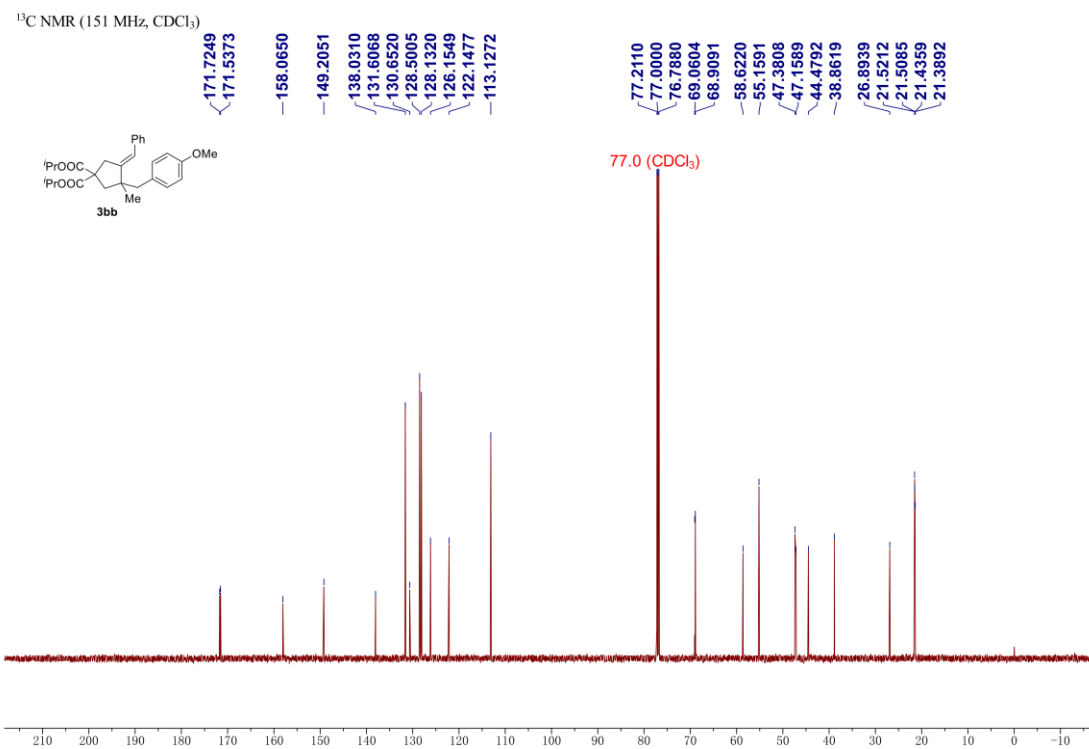

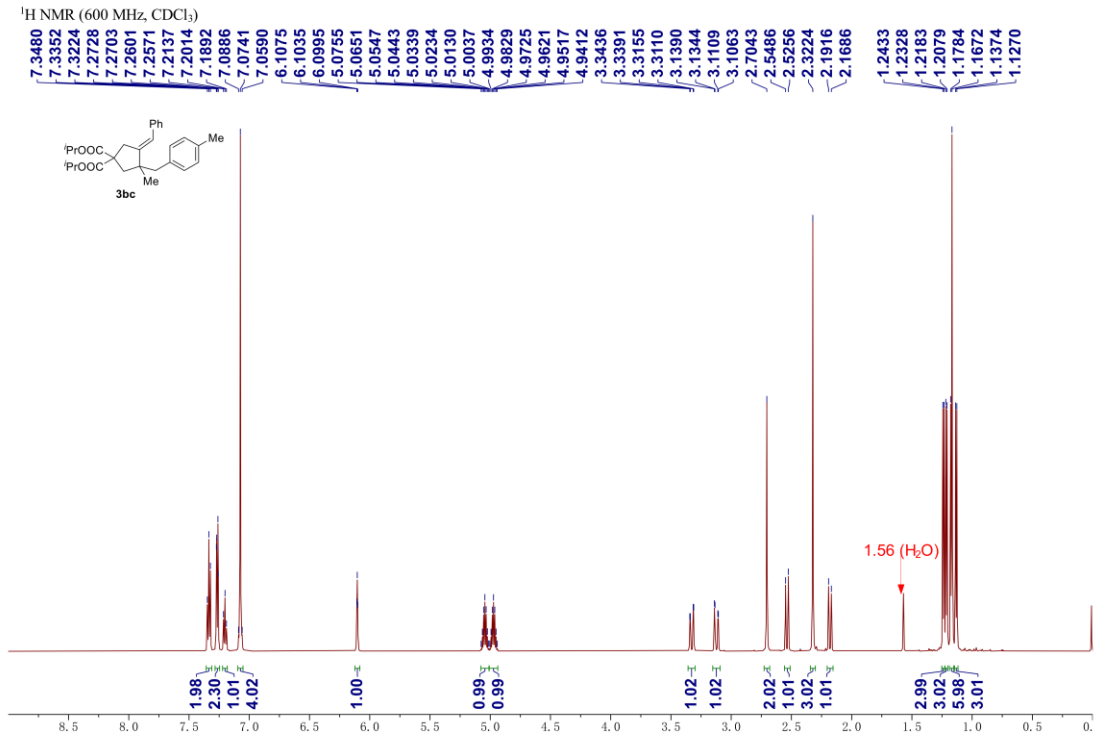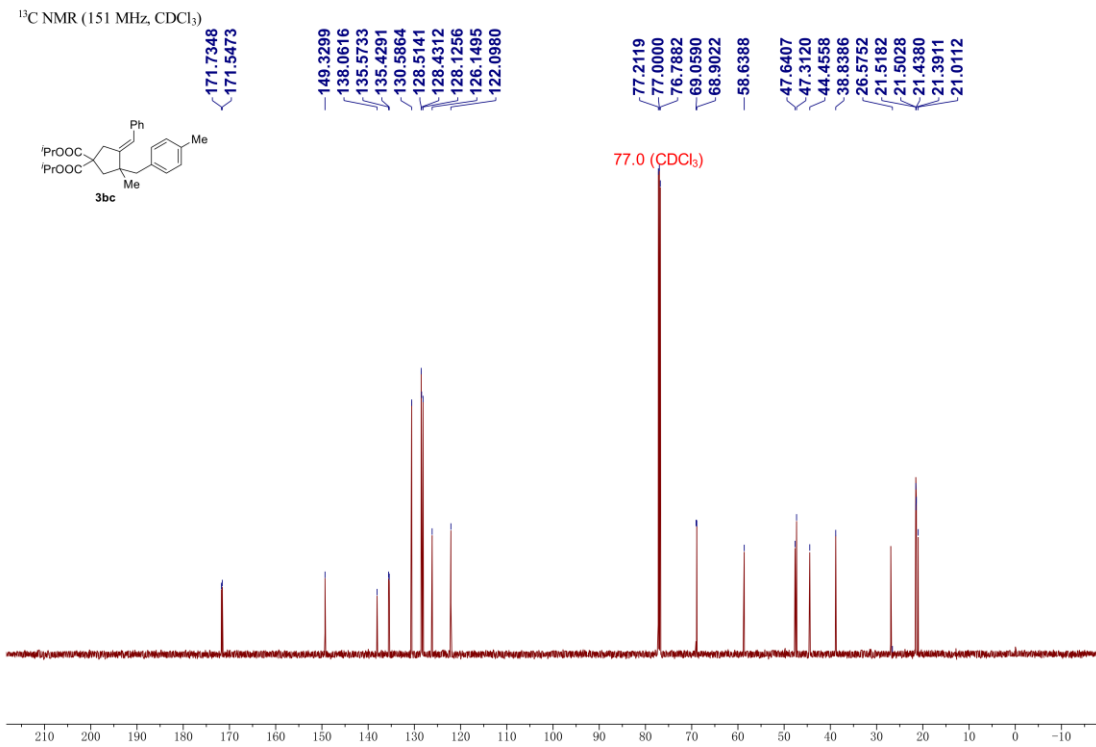

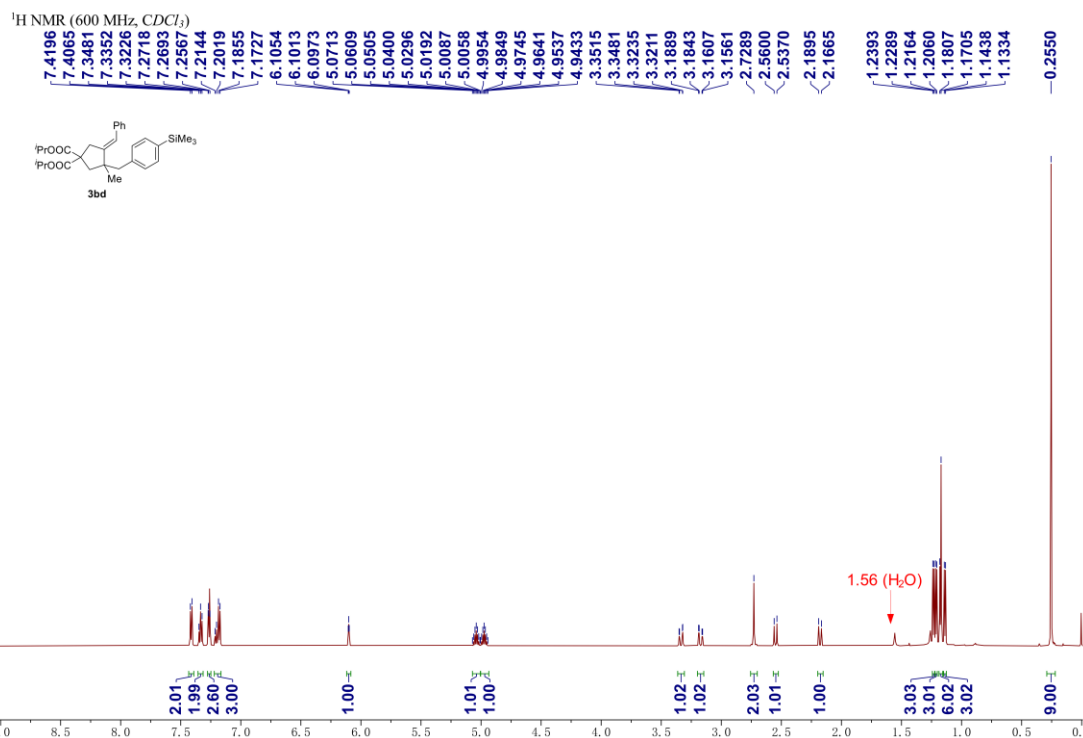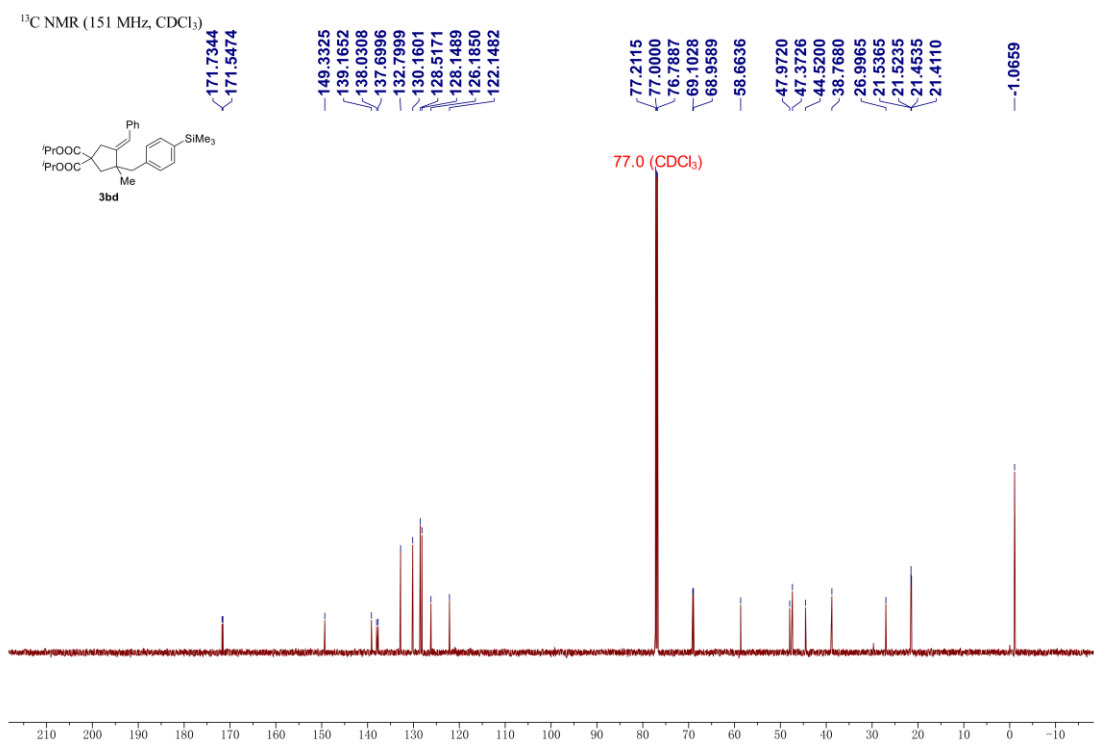

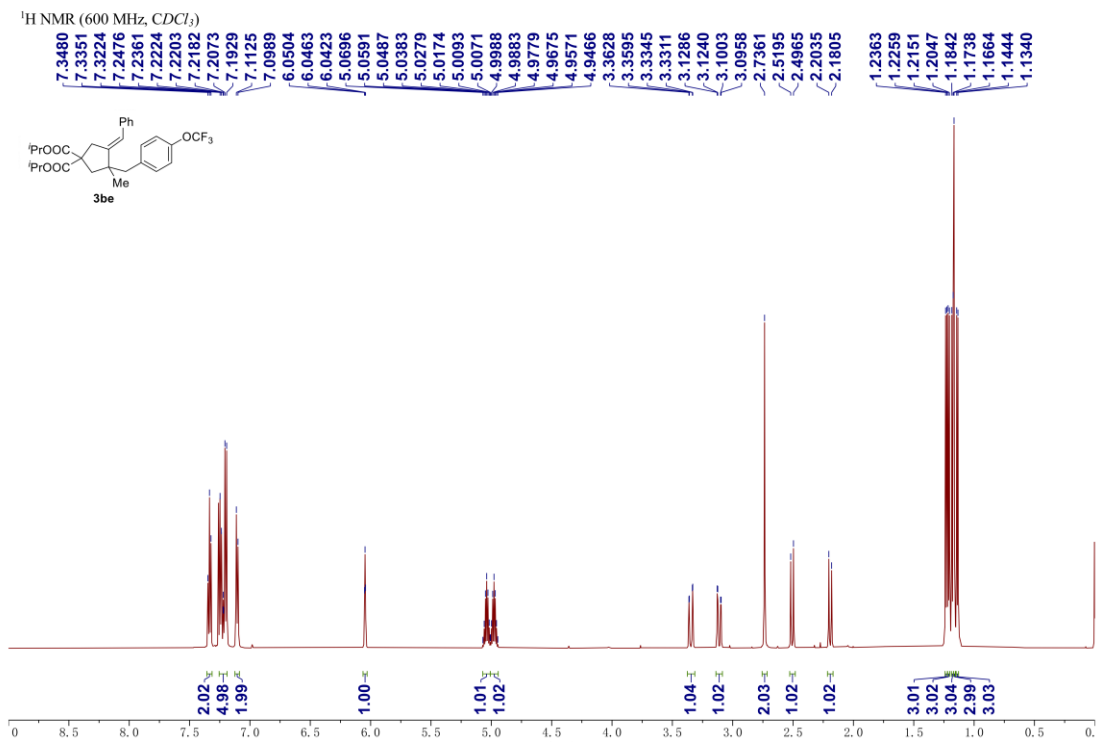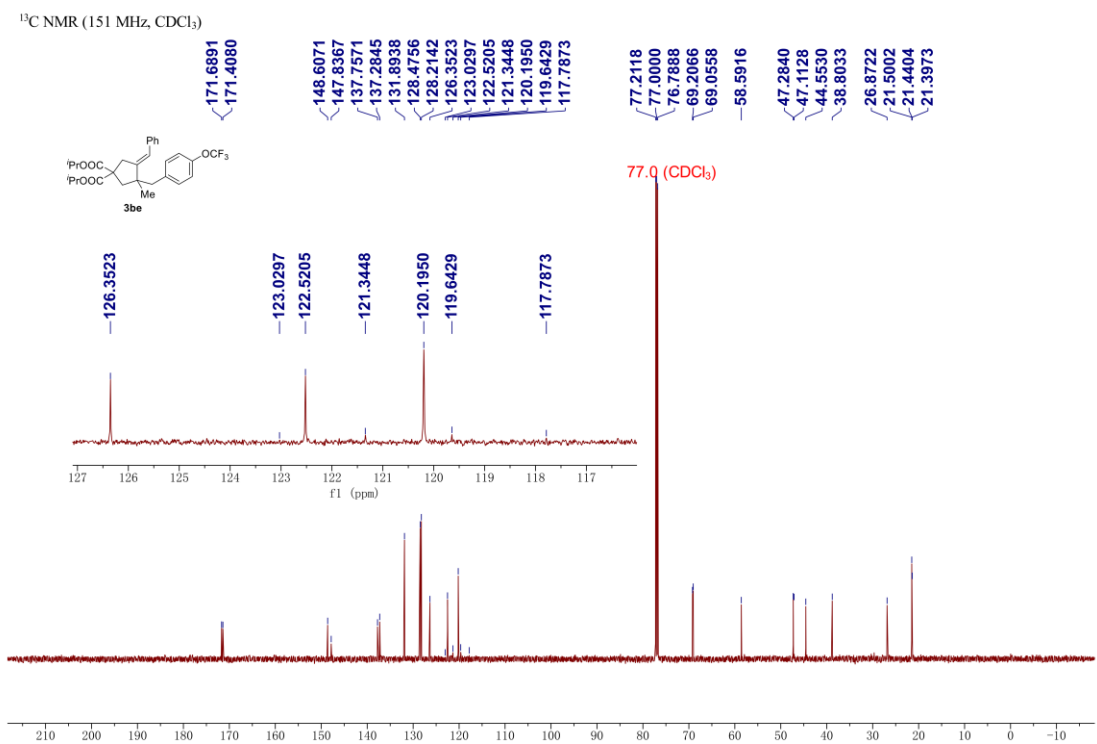

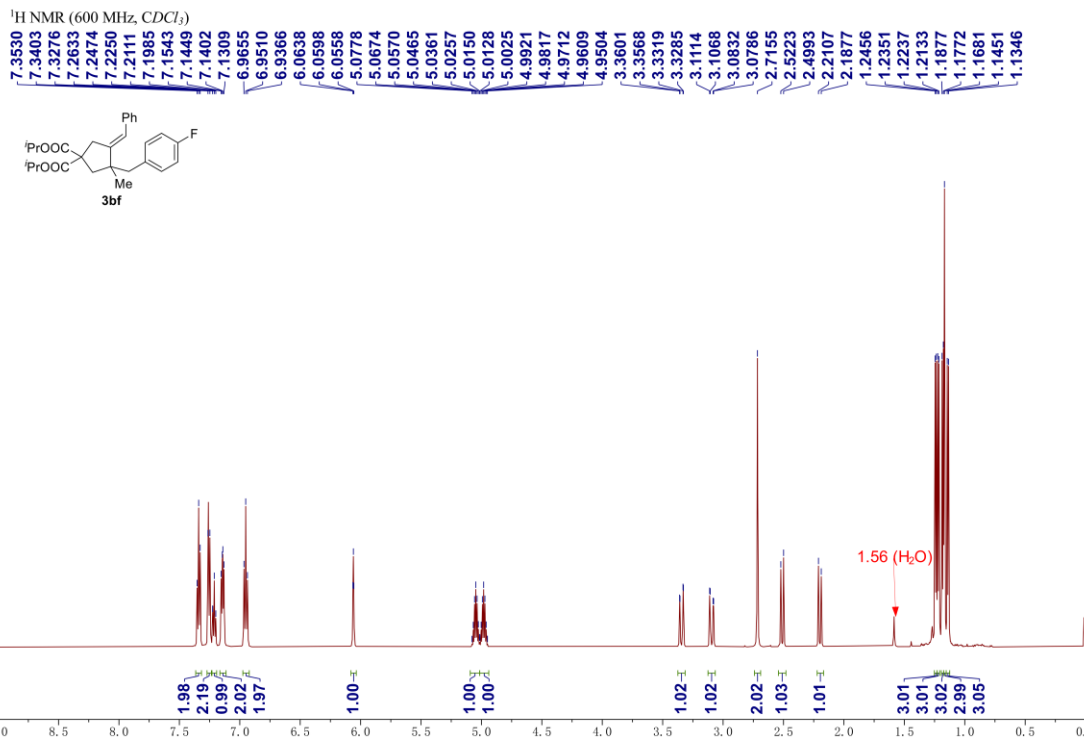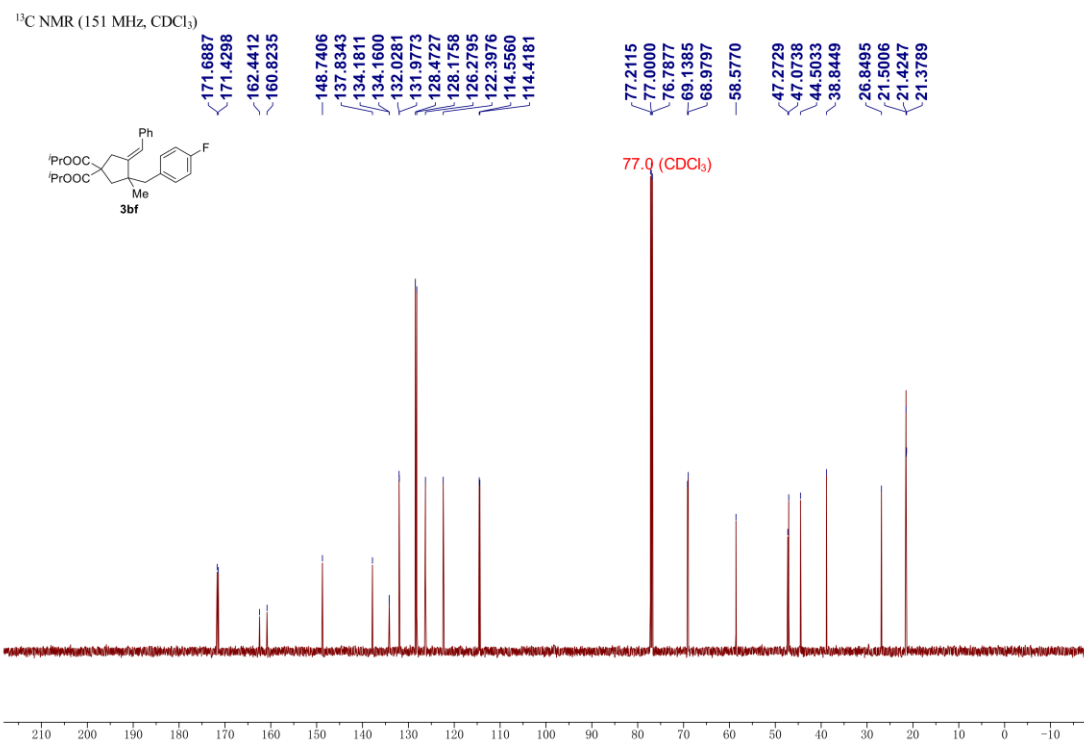



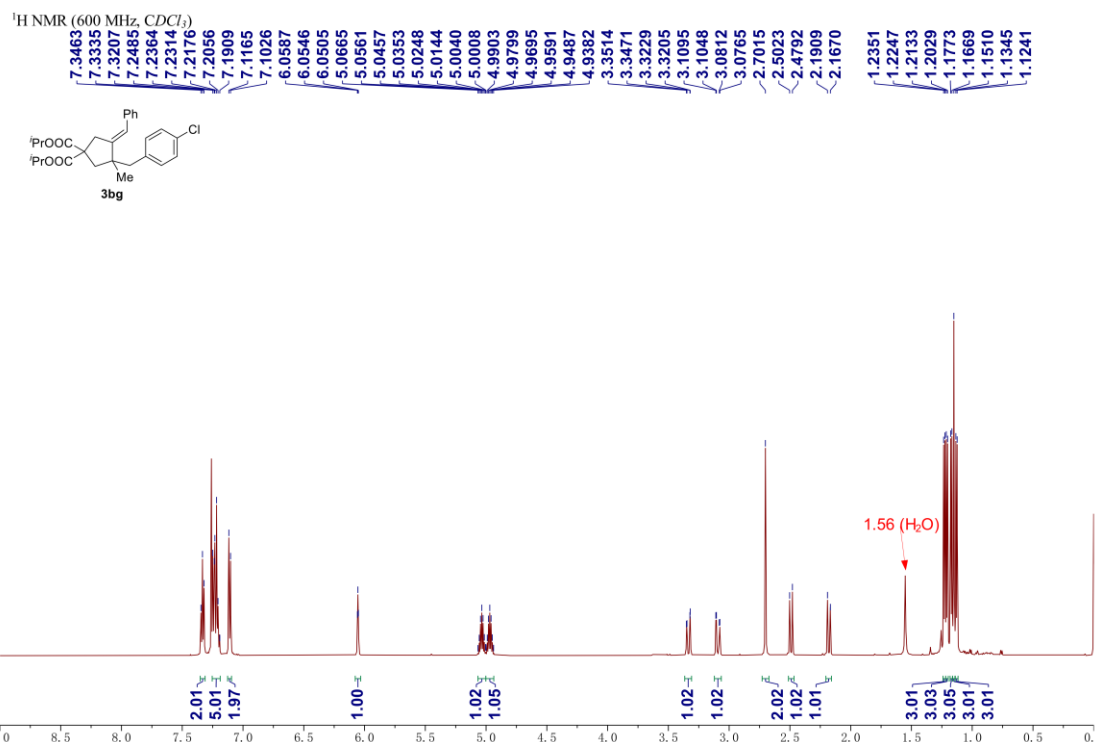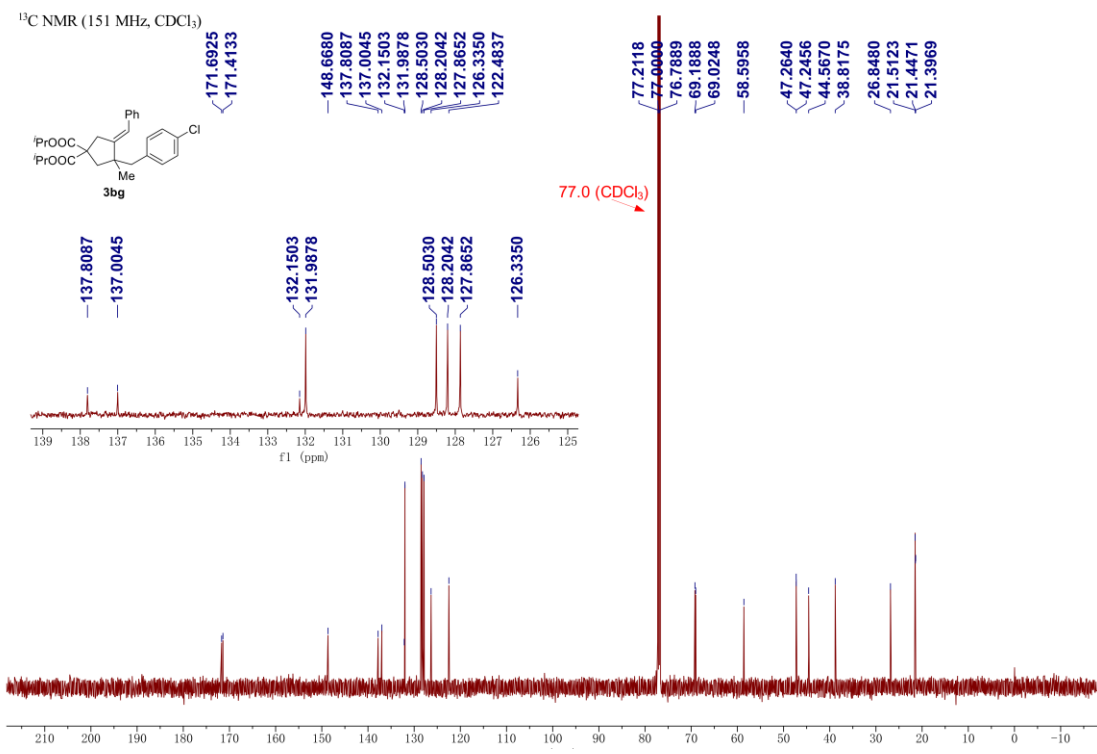

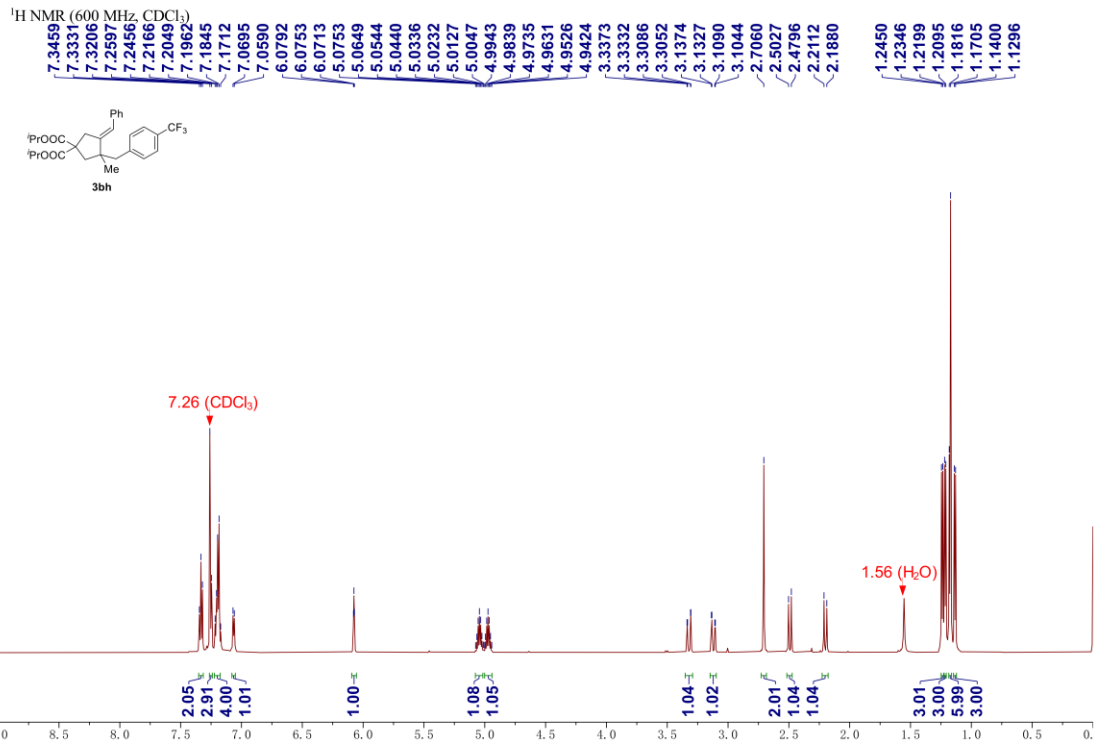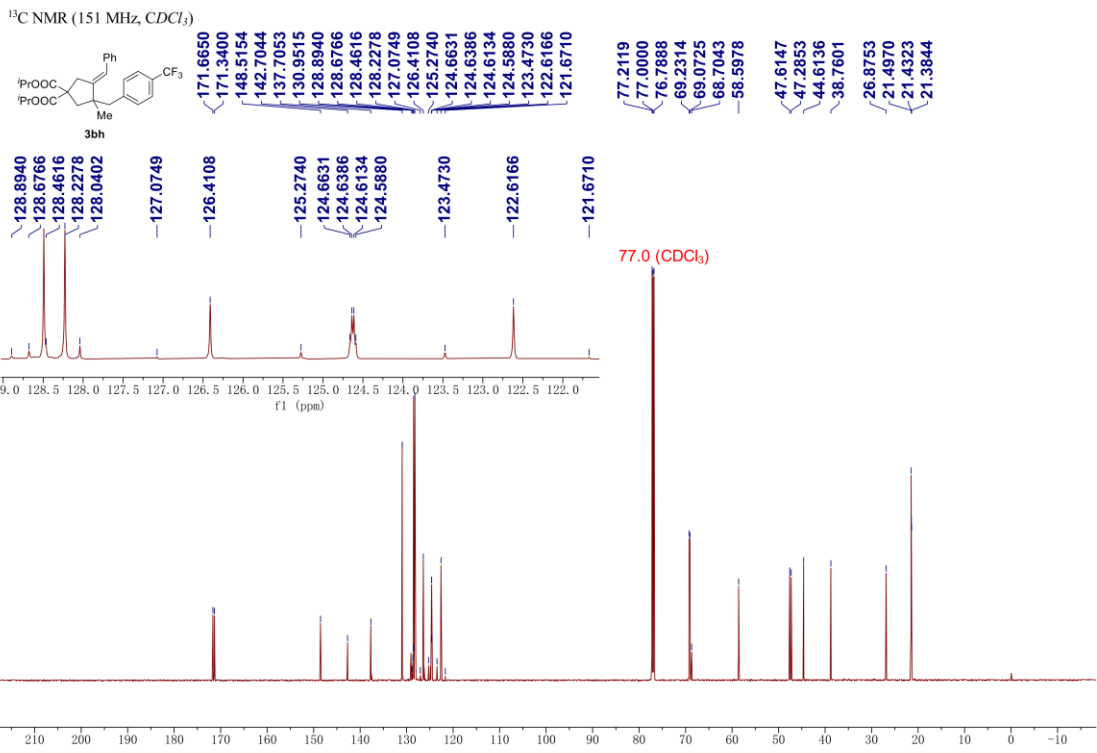

<sup>1</sup>H NMR (600 MHz, CDCl<sub>3</sub>)

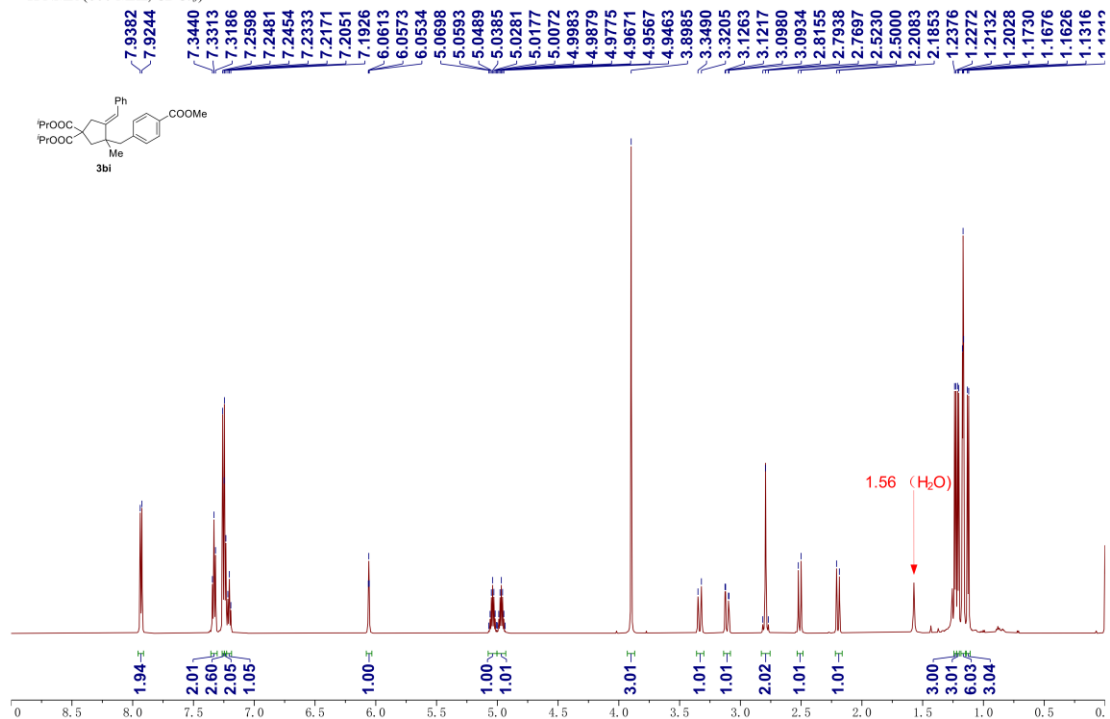

<sup>13</sup>C NMR (151 MHz, CDCl<sub>3</sub>)

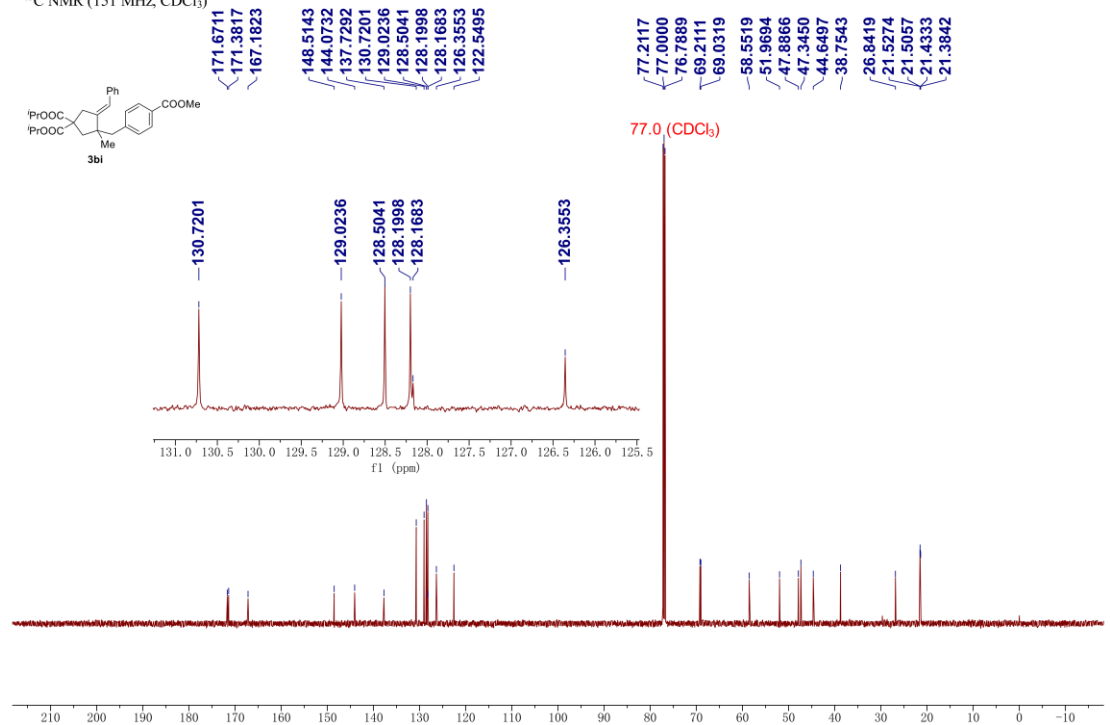

<sup>1</sup>H NMR (600 MHz, CDCl<sub>3</sub>)

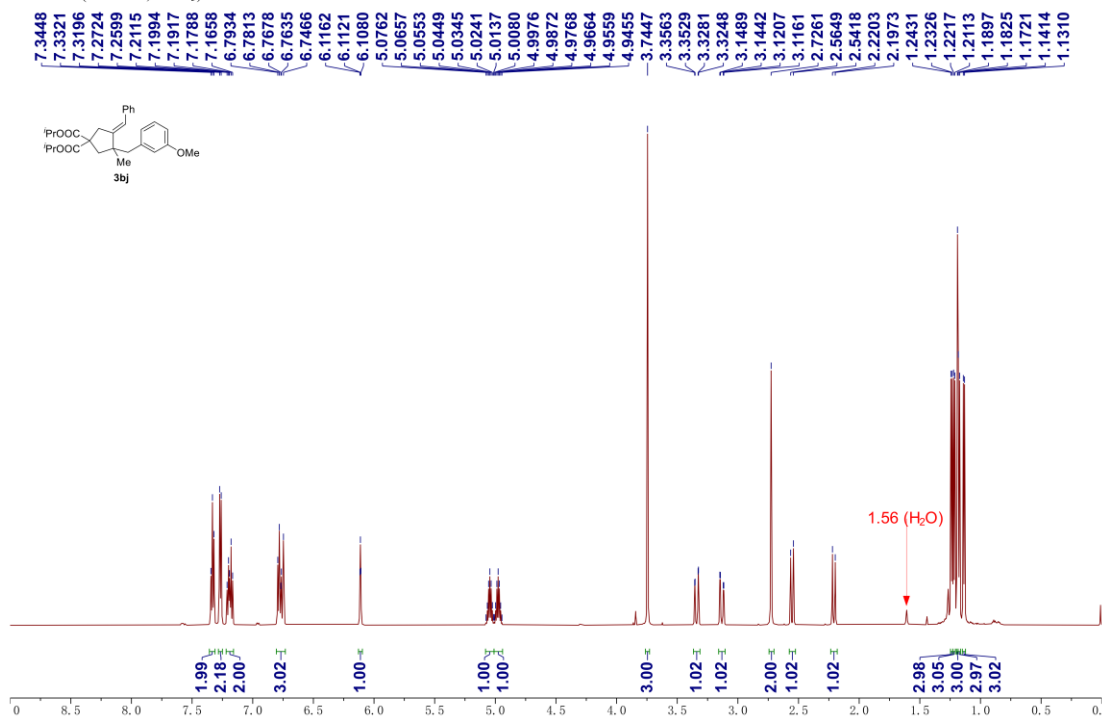

<sup>13</sup>C NMR (151 MHz, CDCl<sub>3</sub>)

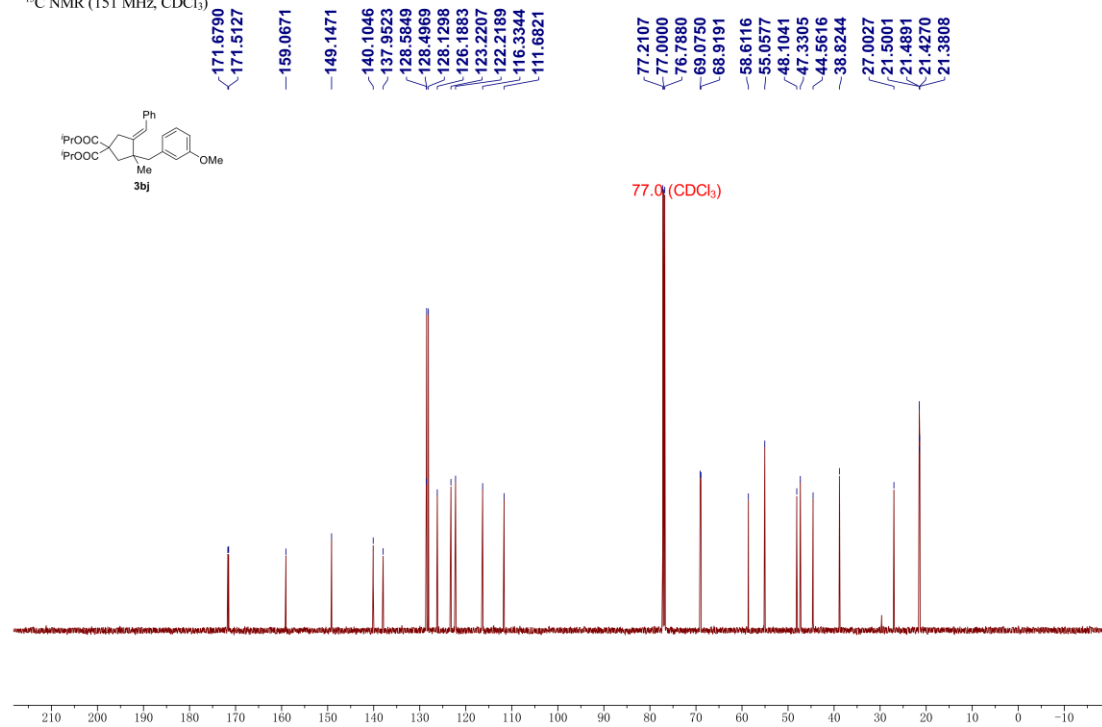

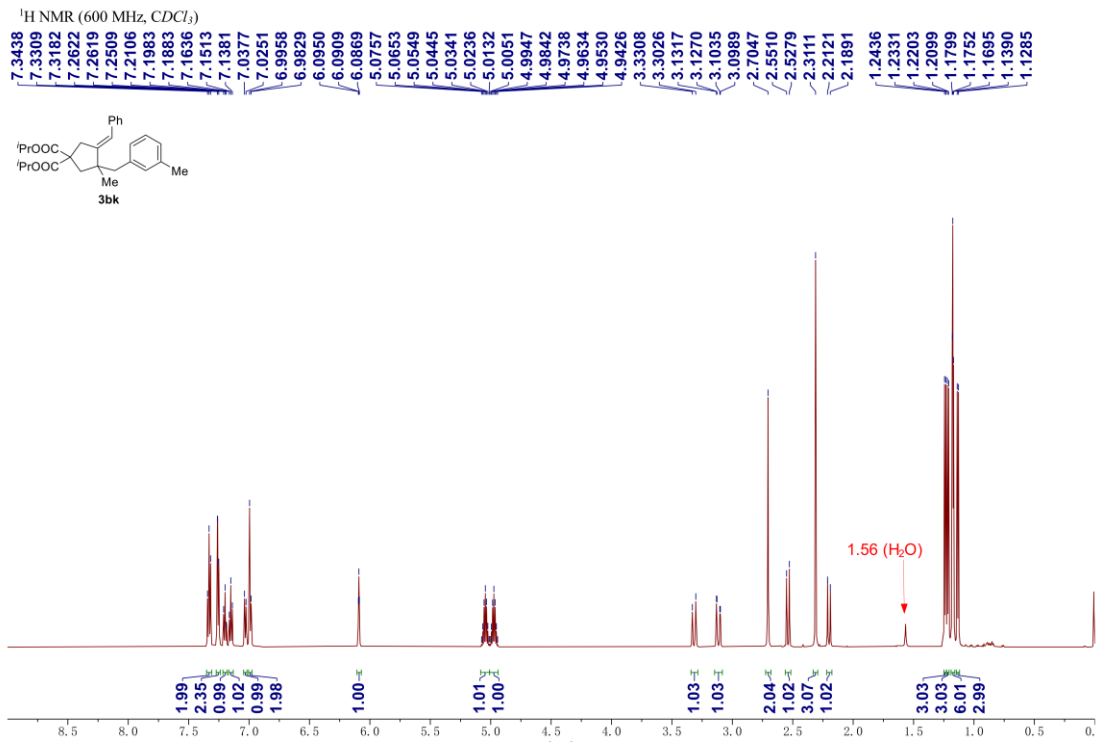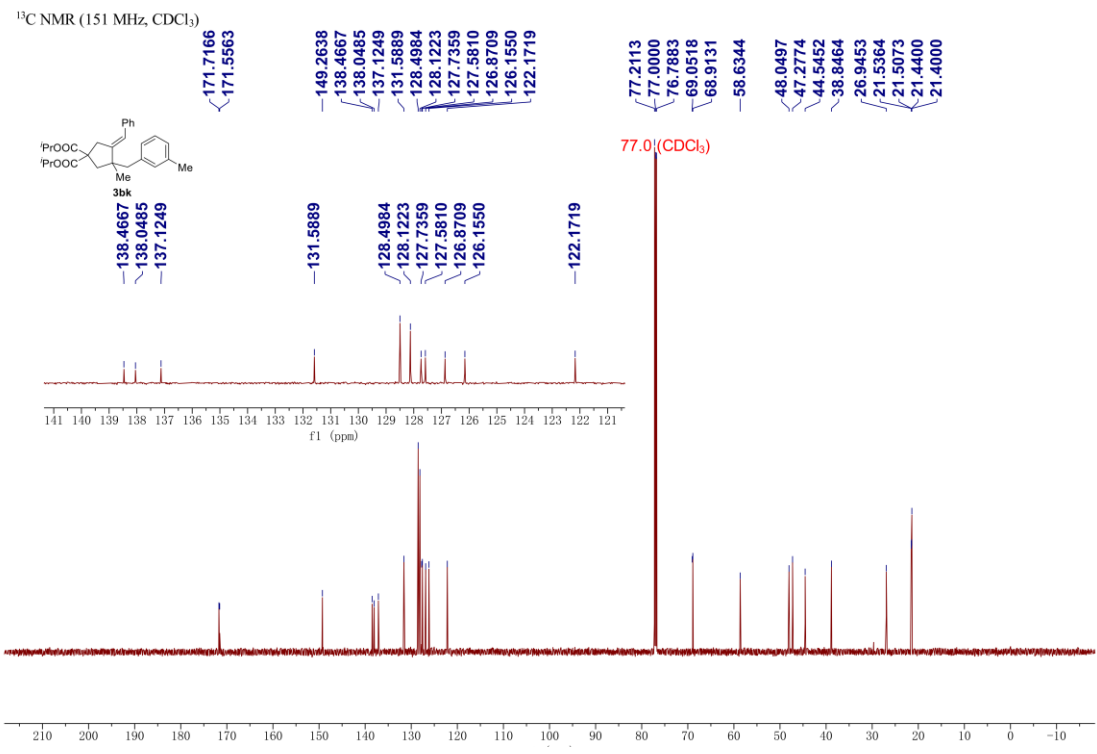

<sup>1</sup>H NMR (600 MHz, CDCl<sub>3</sub>)

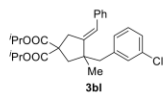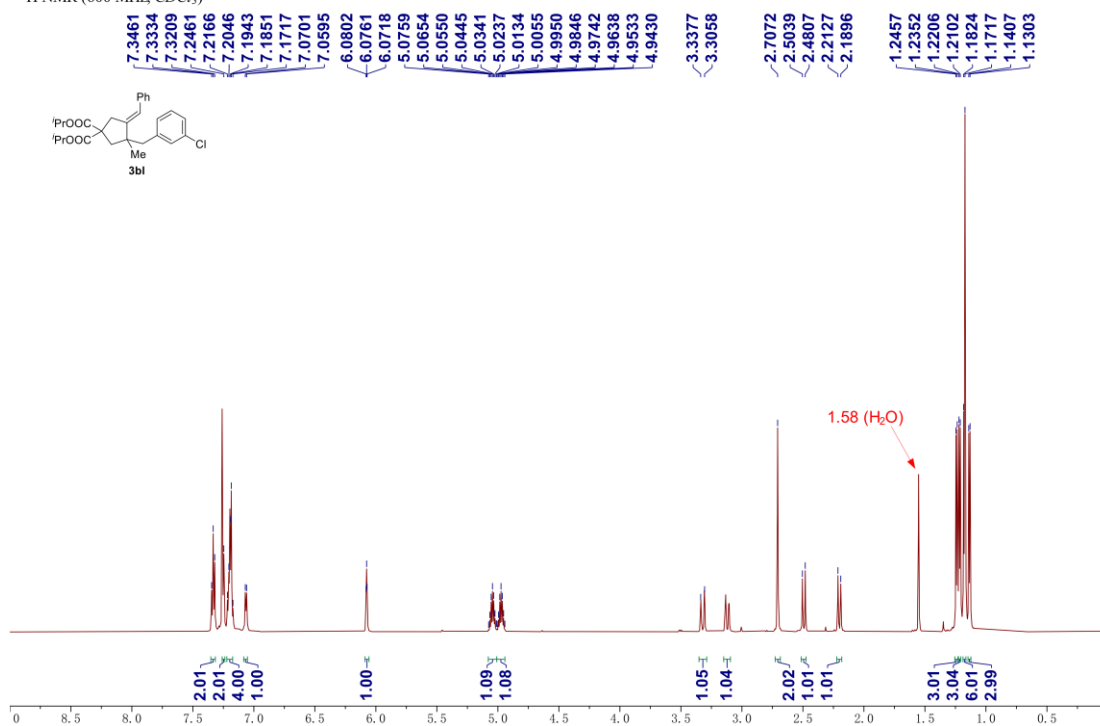

<sup>13</sup>C NMR (151 MHz, CDCl<sub>3</sub>)

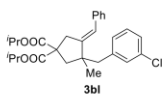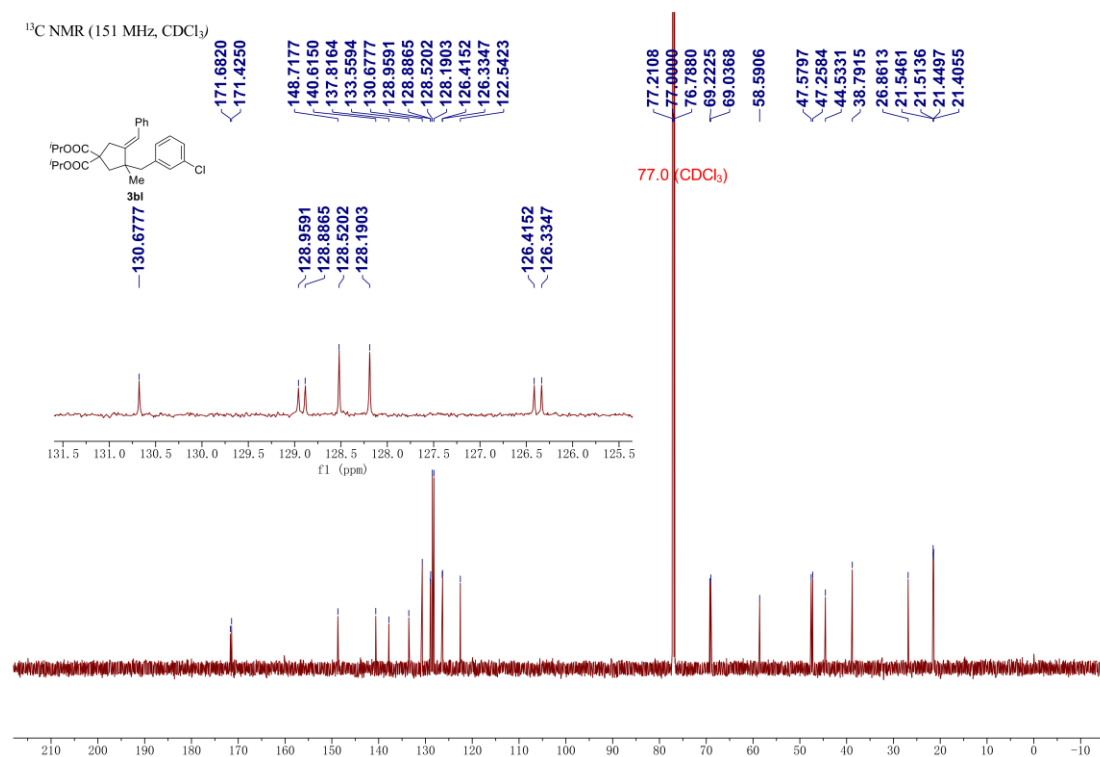

<sup>1</sup>H NMR (600 MHz, CDCl<sub>3</sub>)

7.4903, 7.4851, 7.4822, 7.4761, 7.4727, 7.4330, 7.3767, 7.3679, 7.3437, 7.3310, 7.3184, 7.2449, 7.2307, 7.2205, 7.2067, 7.1941, 6.0476, 6.0435, 6.0397, 5.0630, 5.0526, 5.0422, 5.0317, 5.0213, 5.0109, 5.0046, 4.9942, 4.9838, 4.9734, 4.9629, 4.9525, 4.9421, 3.3430, 3.3397, 3.3149, 3.3115, 3.1366, 3.1320, 3.1083, 3.1036, 2.7963, 2.4907, 2.4676, 2.2414, 2.2183, 1.2371, 1.2267, 1.2172, 1.2068, 1.1812, 1.1780, 1.1710, 1.1361, 1.1257

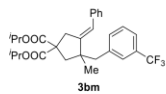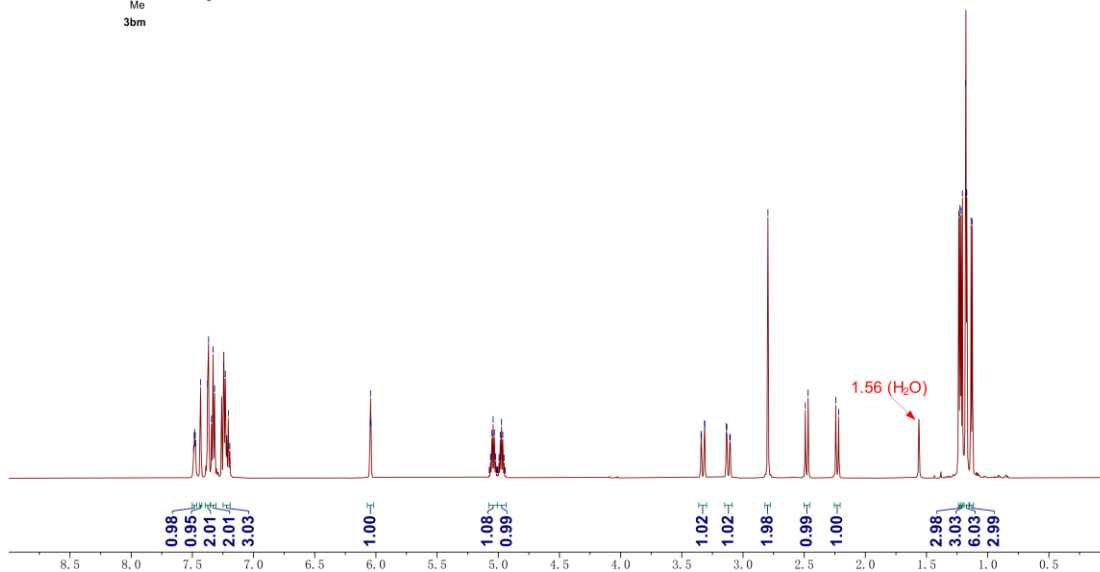

<sup>13</sup>C NMR (151 MHz, CDCl<sub>3</sub>)

171.6488, 171.3619, 148.3198, 139.4581, 137.6787, 134.0165, 130.4318, 130.2187, 130.0073, 129.7962, 128.4915, 128.1808, 128.1299, 127.2899, 127.2652, 127.2400, 127.2154, 127.2154, 126.9452, 126.3869, 125.1424, 123.3370, 123.1236, 123.0976, 123.0730, 122.7615, 121.5537, 77.2114, 77.0000, 76.7884, 69.2295, 69.0560, 58.5801, 47.6586, 47.2614, 44.6208, 38.7934, 26.7663, 21.4839, 21.4295, 21.3859

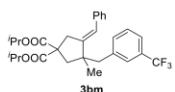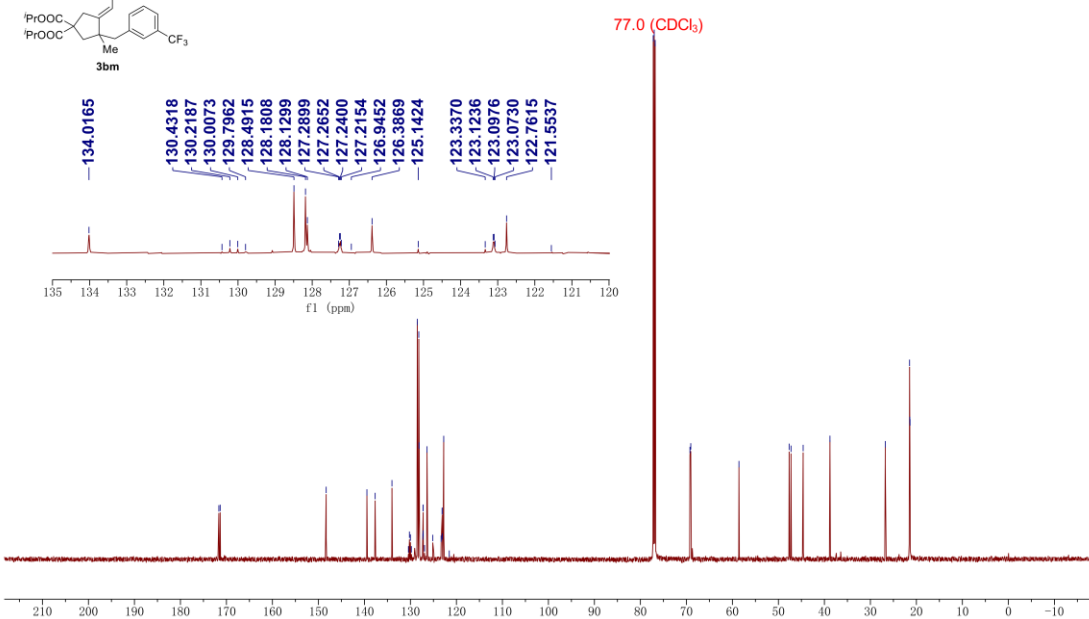

<sup>1</sup>H NMR (600 MHz, CDCl<sub>3</sub>)

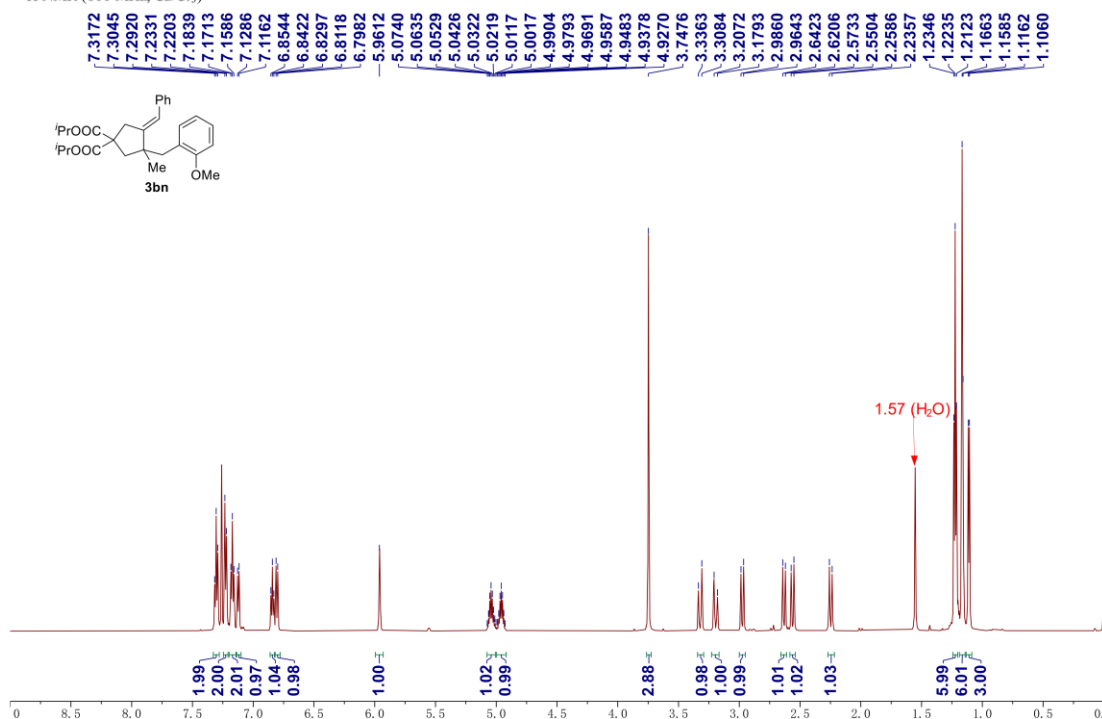

<sup>13</sup>C NMR (151 MHz, CDCl<sub>3</sub>)

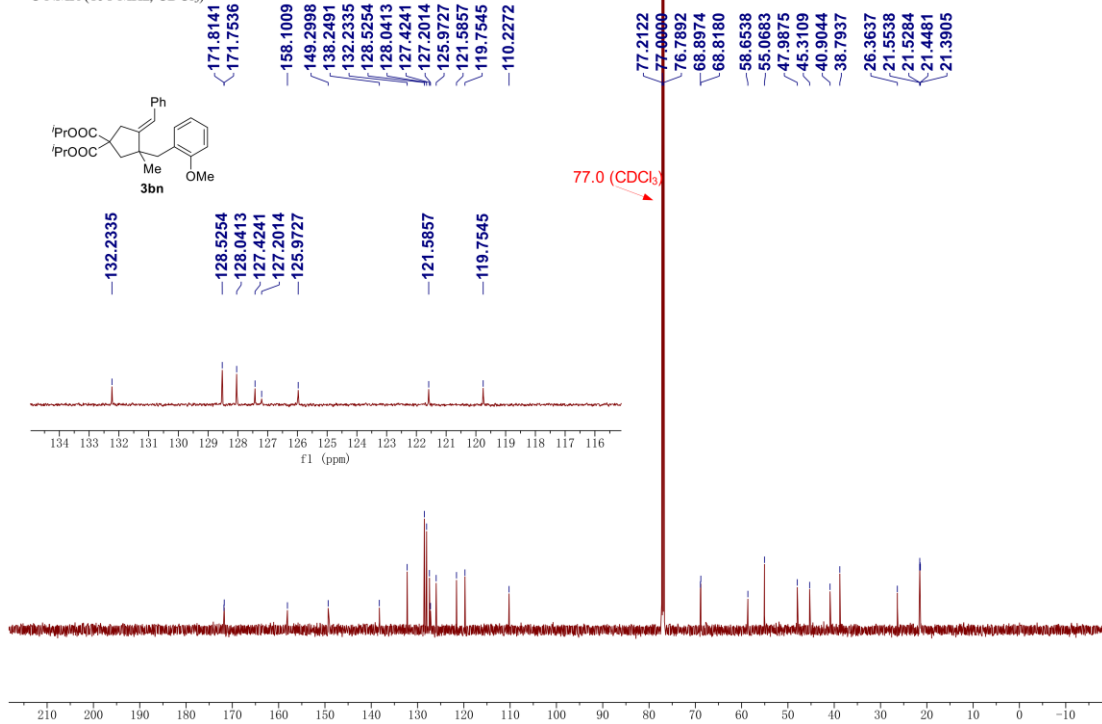



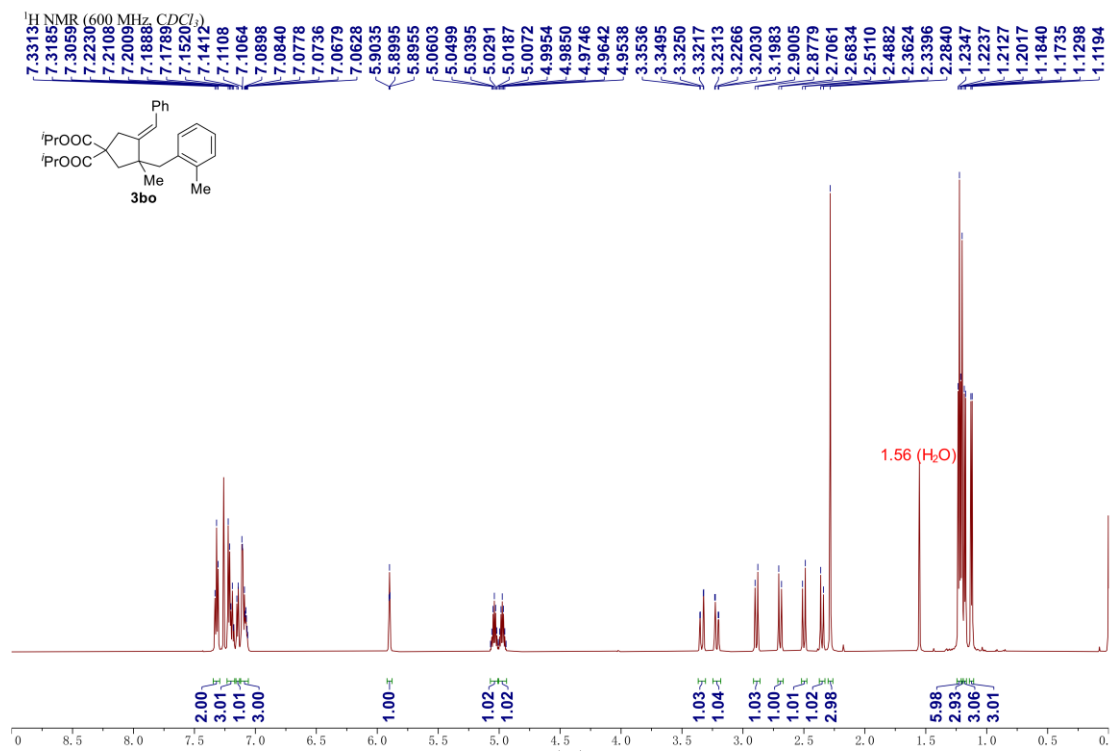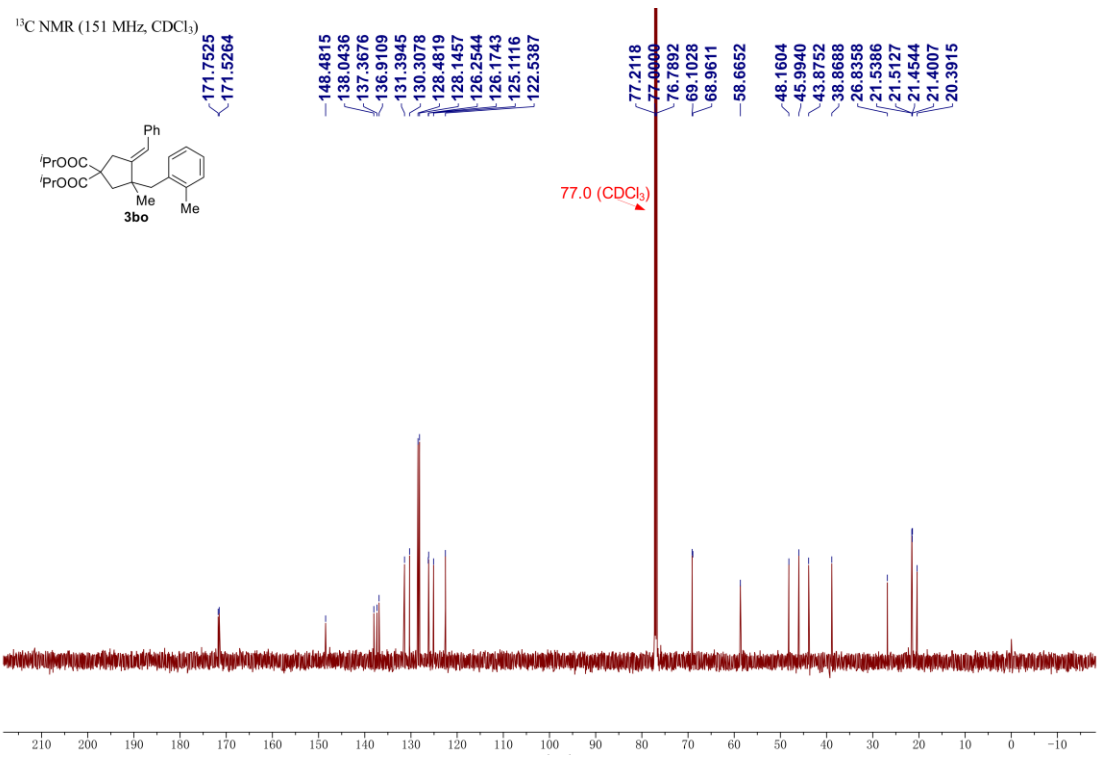

<sup>1</sup>H NMR (600 MHz, CDCl<sub>3</sub>)

7.8205  
7.8086  
7.7895  
7.7777  
7.7478  
7.7339  
7.6521  
7.4663  
7.4637  
7.4550  
7.4455  
7.4430  
7.4393  
7.4325  
7.4300  
7.4213  
7.3542  
7.3408  
7.3285  
7.2731  
7.2239  
7.2117  
7.1996  
6.1358  
6.1317  
6.1277  
5.0517  
5.0413  
5.0308  
5.0205  
4.9995  
4.9891  
4.9787  
4.9683  
4.9579  
3.3840  
3.3807  
3.3560  
3.3527  
3.1675  
3.1629  
3.1394  
3.1348  
2.9228  
2.6448  
2.6219  
2.2391  
2.2162  
1.2276  
1.2176  
1.2021  
1.1917  
1.1764  
1.1660  
1.1426  
1.1322

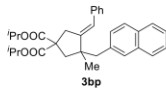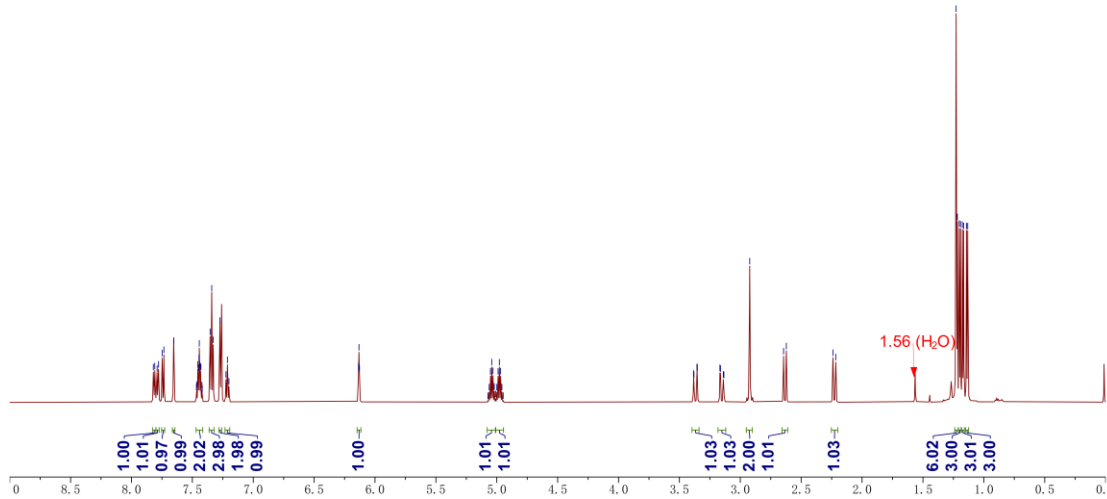

<sup>13</sup>C NMR (151 MHz, CDCl<sub>3</sub>)

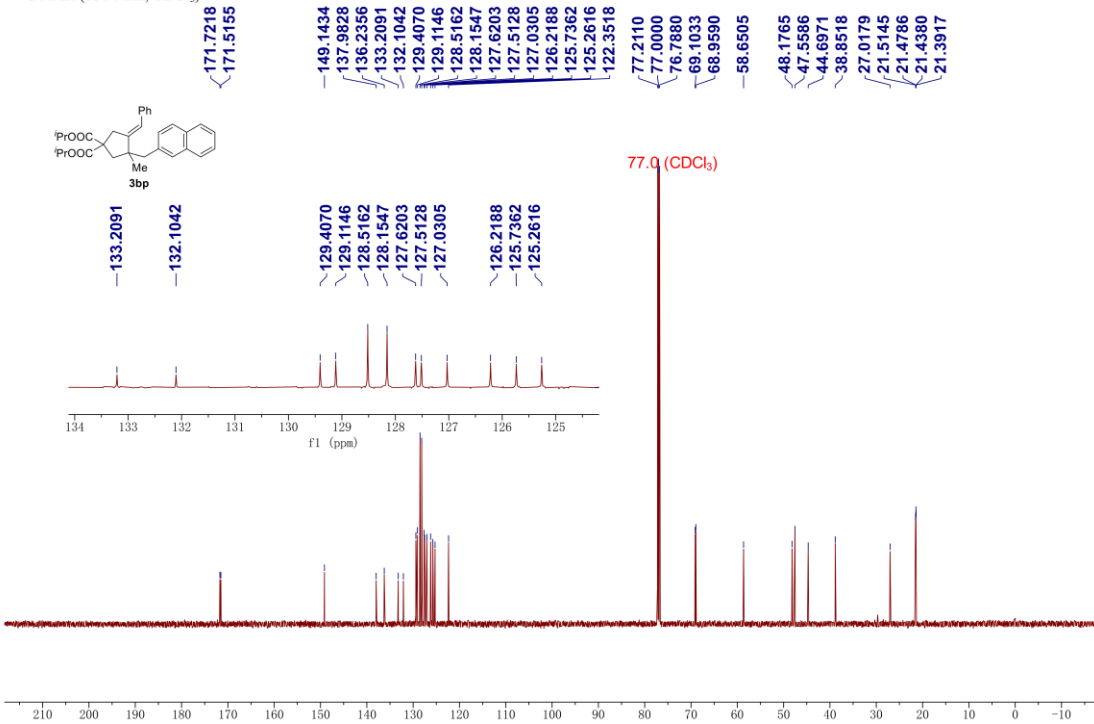

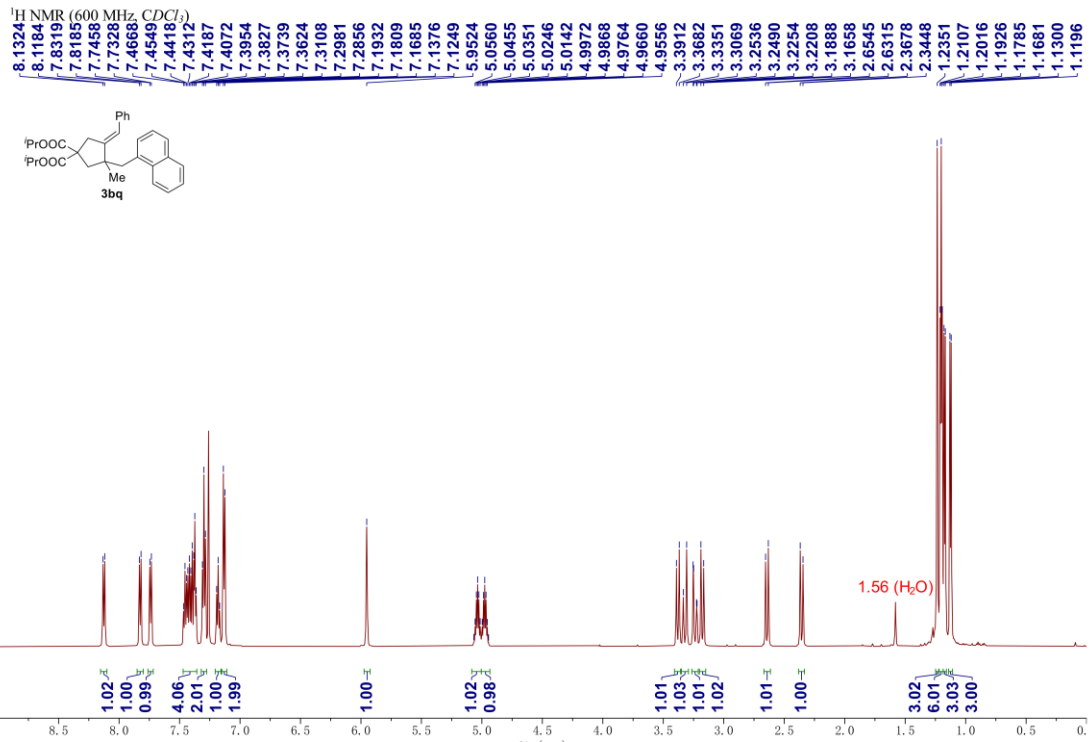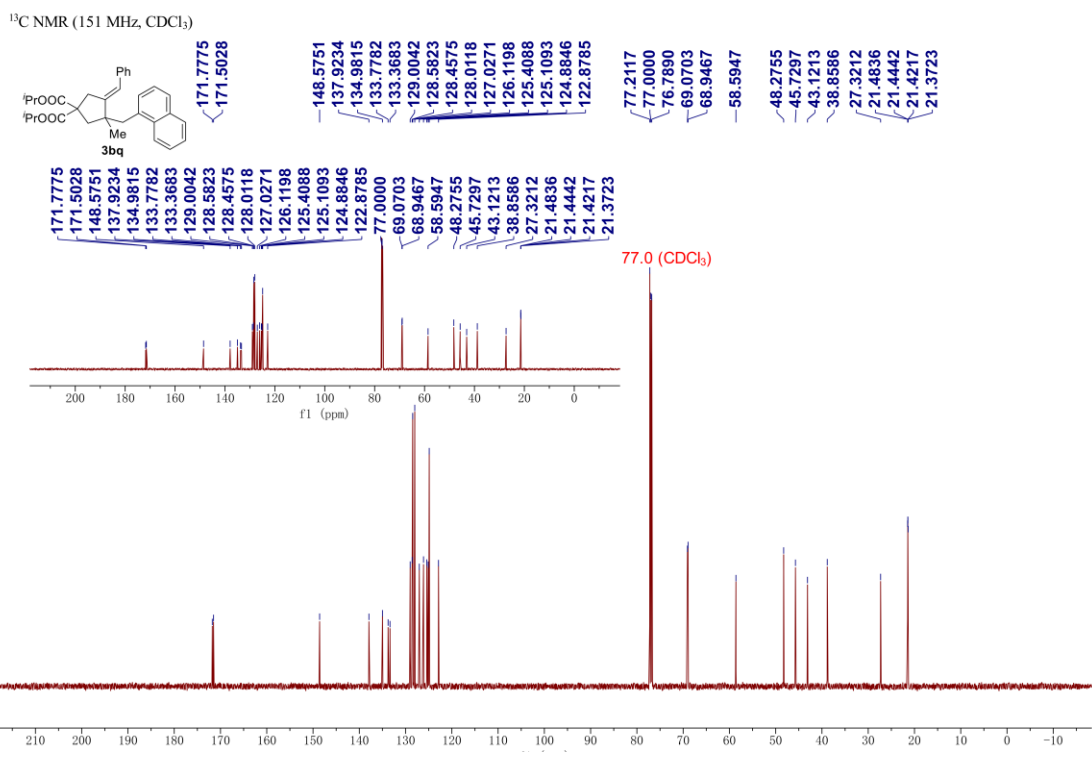

<sup>1</sup>H NMR (600 MHz, CDCl<sub>3</sub>)

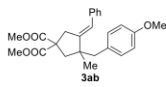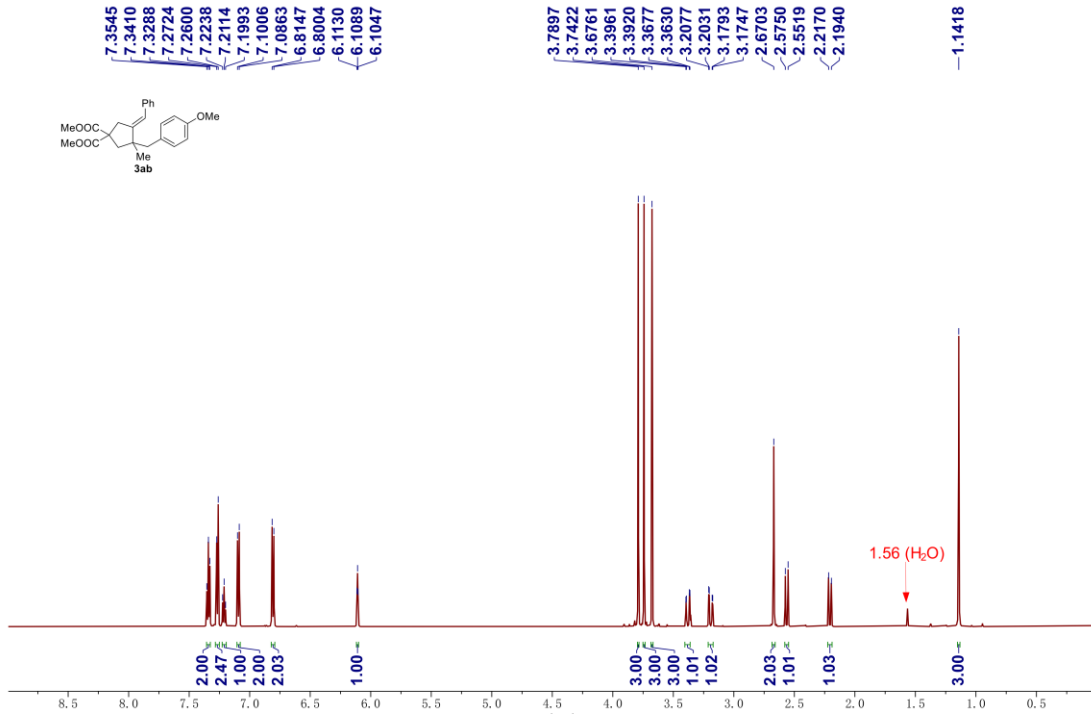

<sup>13</sup>C NMR (151 MHz, CDCl<sub>3</sub>)

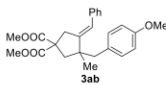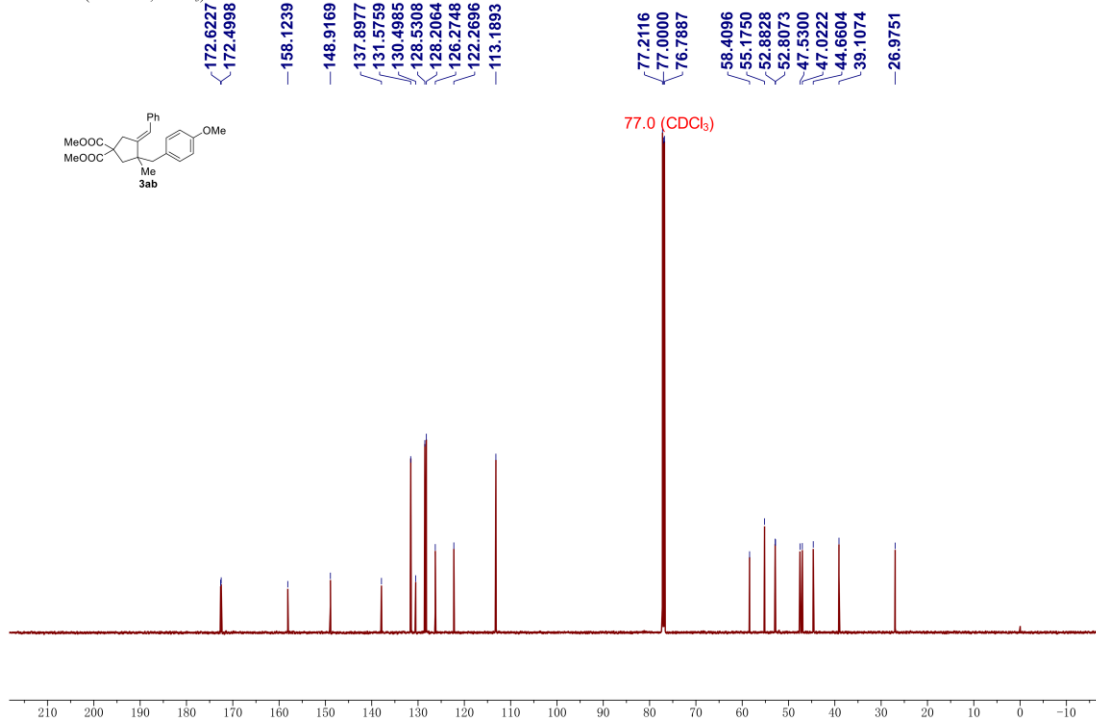

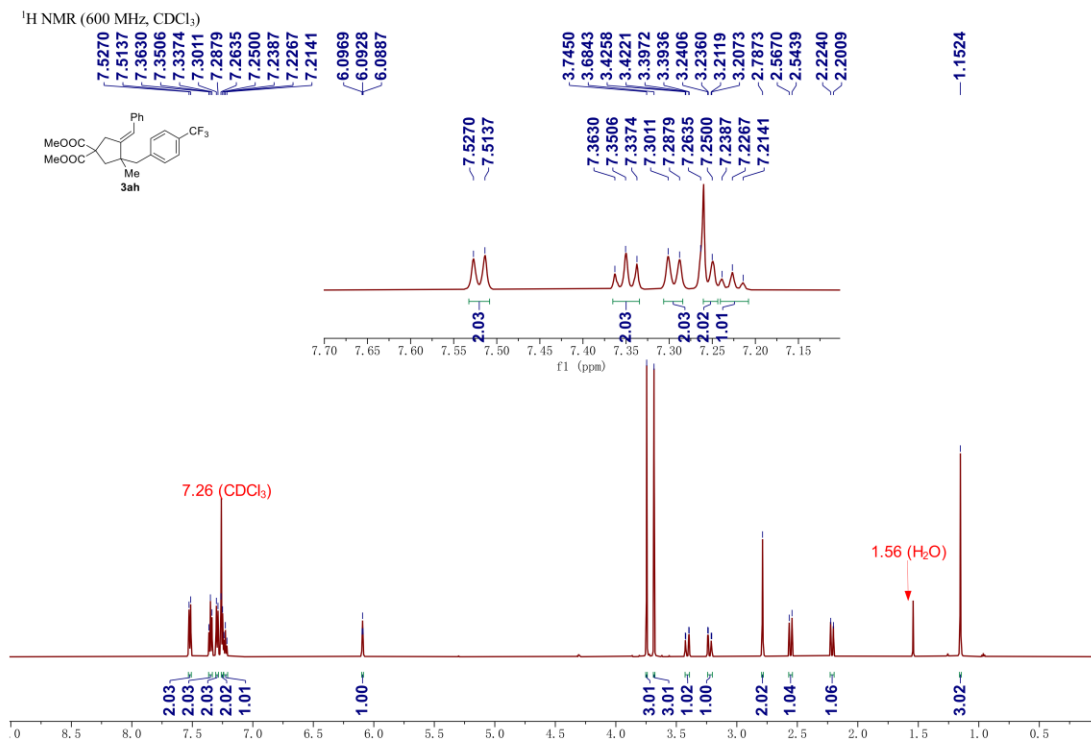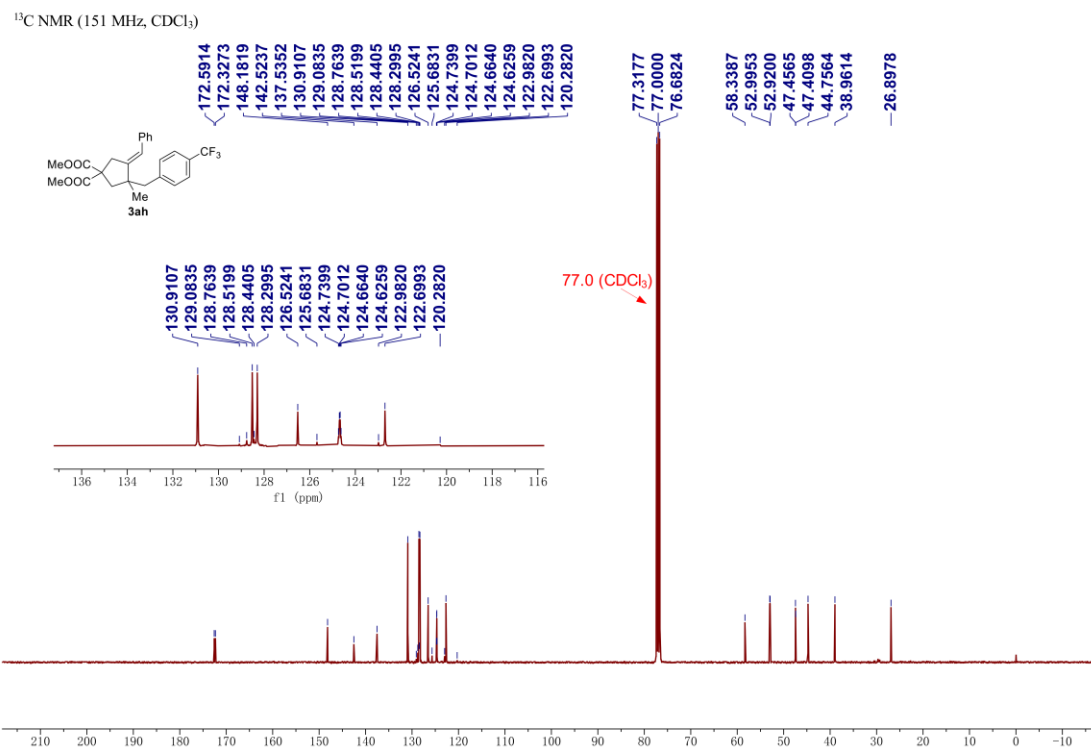

<sup>1</sup>H NMR (600 MHz, CDCl<sub>3</sub>)

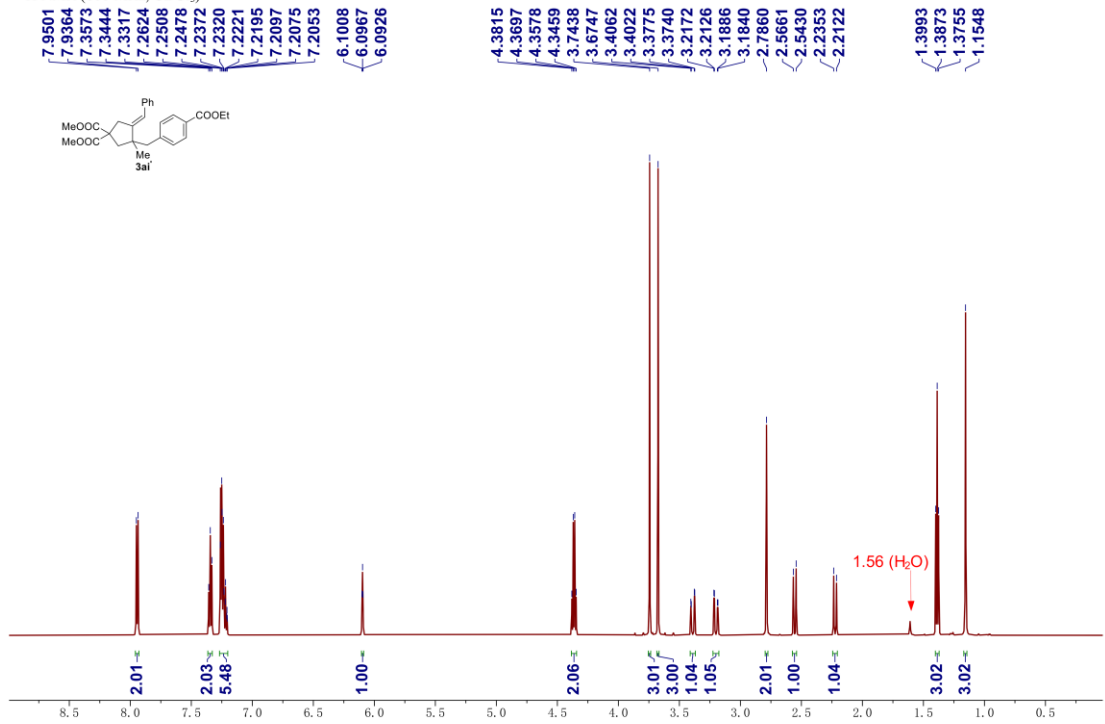

<sup>13</sup>C NMR (151 MHz, CDCl<sub>3</sub>)

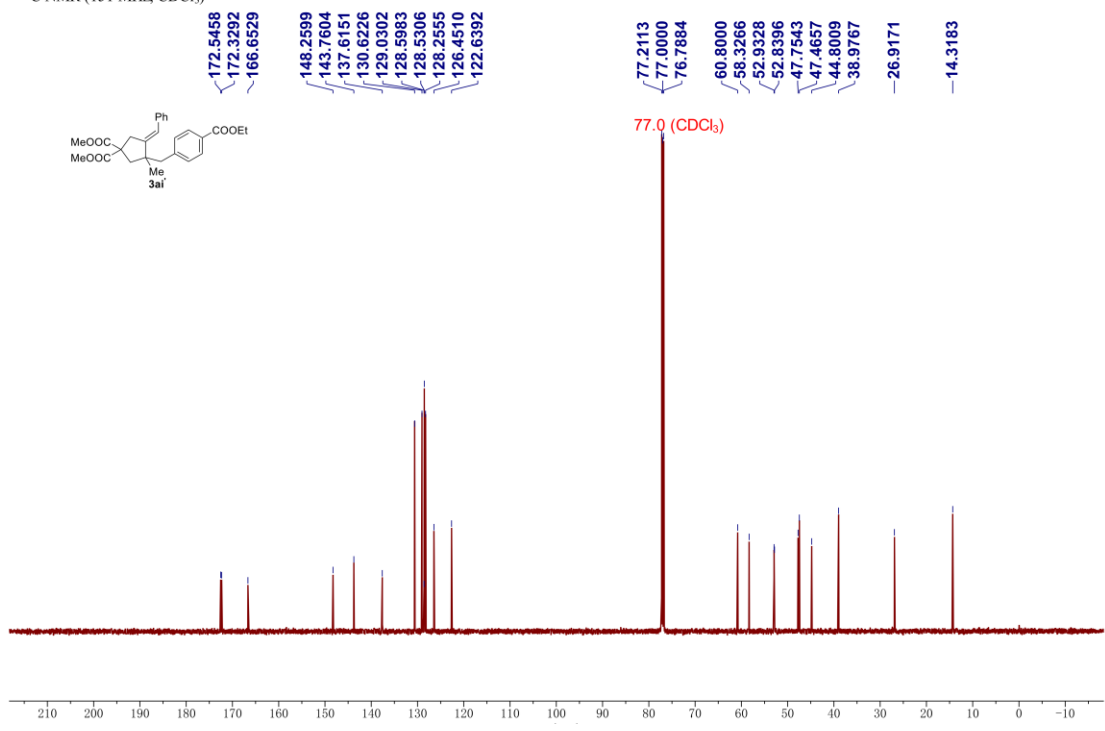

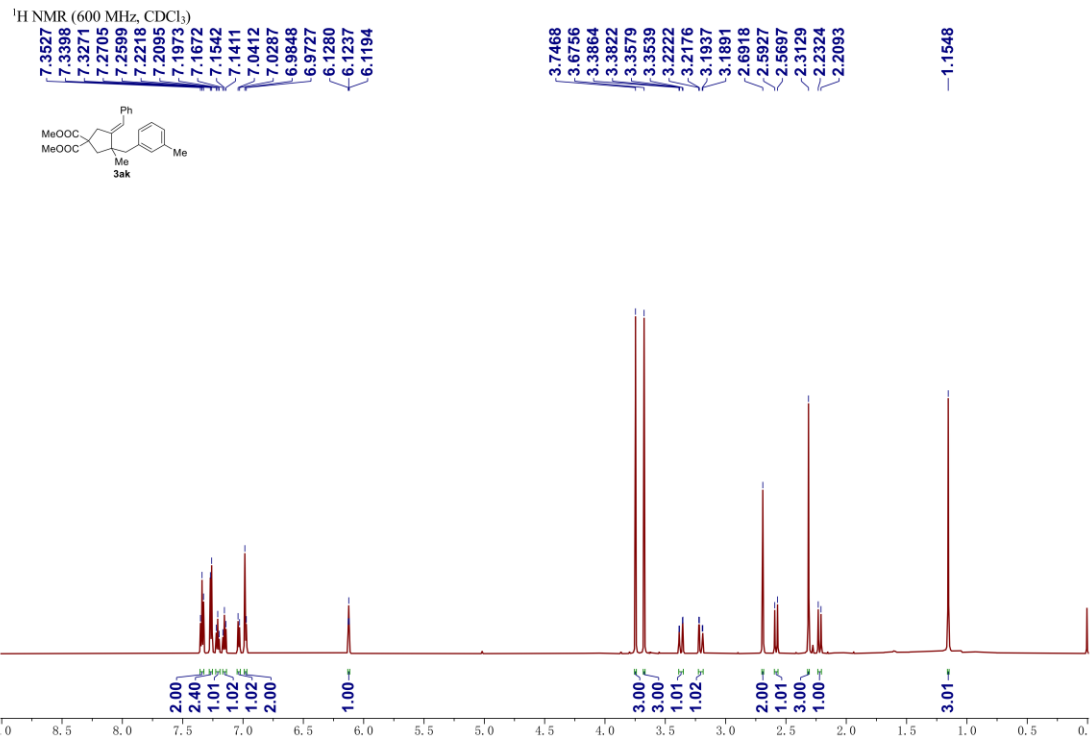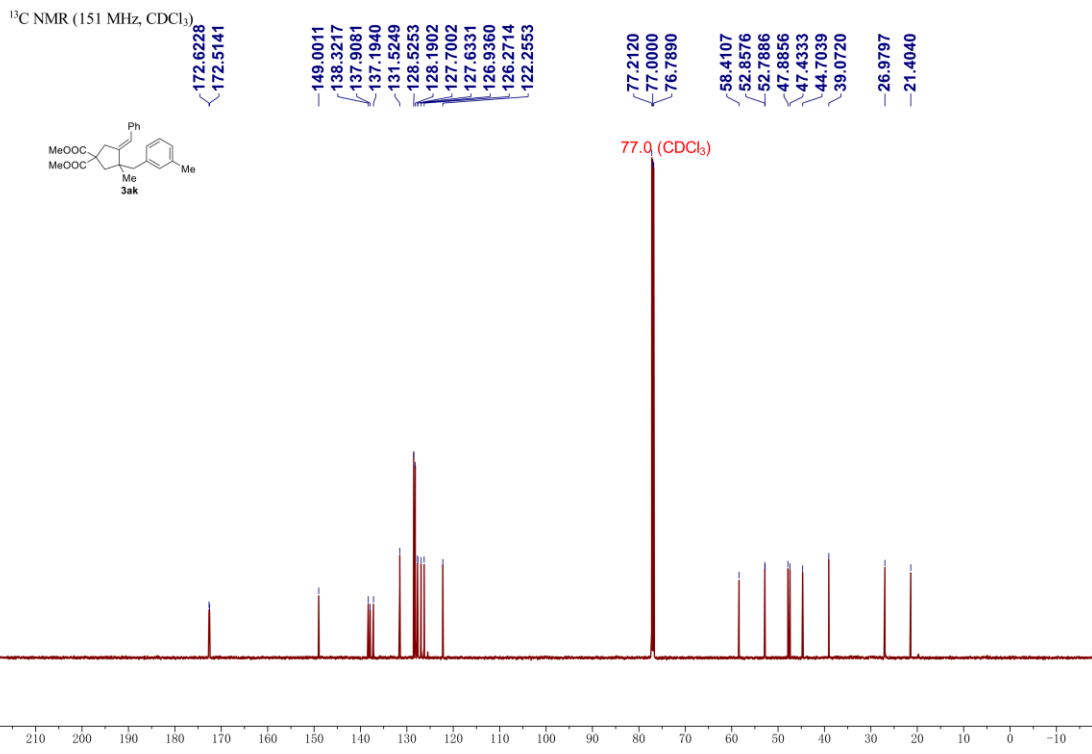

<sup>1</sup>H NMR (600 MHz, CDCl<sub>3</sub>)

7.9097  
7.8971  
7.8499  
7.3783  
7.3756  
7.3729  
7.3656  
7.3629  
7.3602  
7.3501  
7.3468  
7.3377  
7.3365  
7.3342  
7.3275  
7.3245  
7.3215  
7.2653  
7.2628  
7.2512  
7.2492  
7.2245  
7.2119  
7.2000  
6.0828  
6.0786  
6.0745  
3.8732  
3.7603  
3.6770  
3.3772  
3.3737  
3.3488  
3.3452  
3.2632  
3.2585  
3.2345  
3.2299  
2.7712  
2.5500  
2.5269  
2.2537  
2.2306

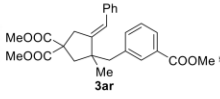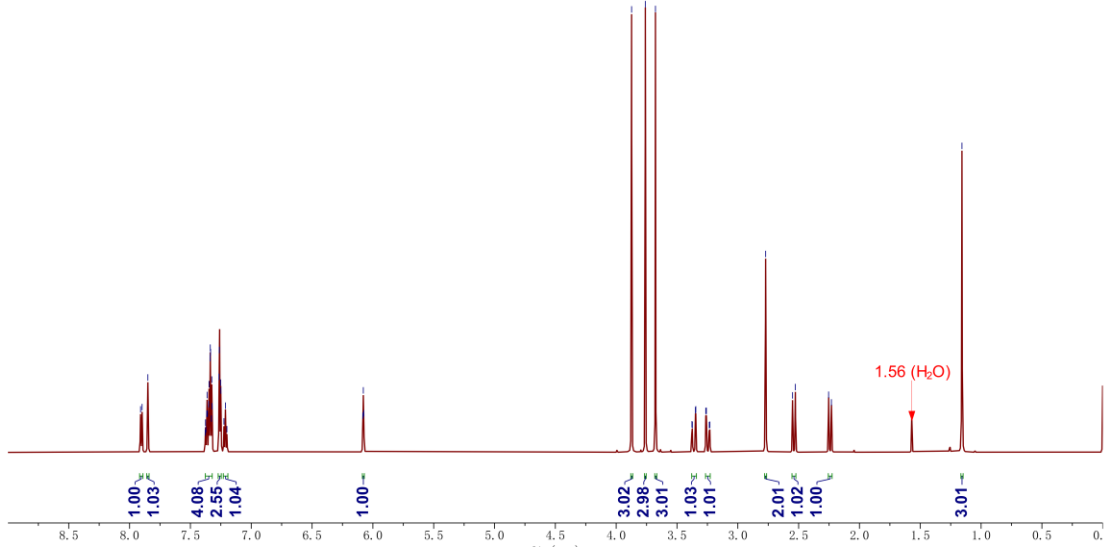

<sup>13</sup>C NMR (151 MHz, CDCl<sub>3</sub>)

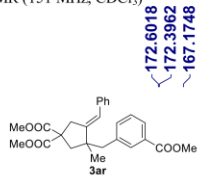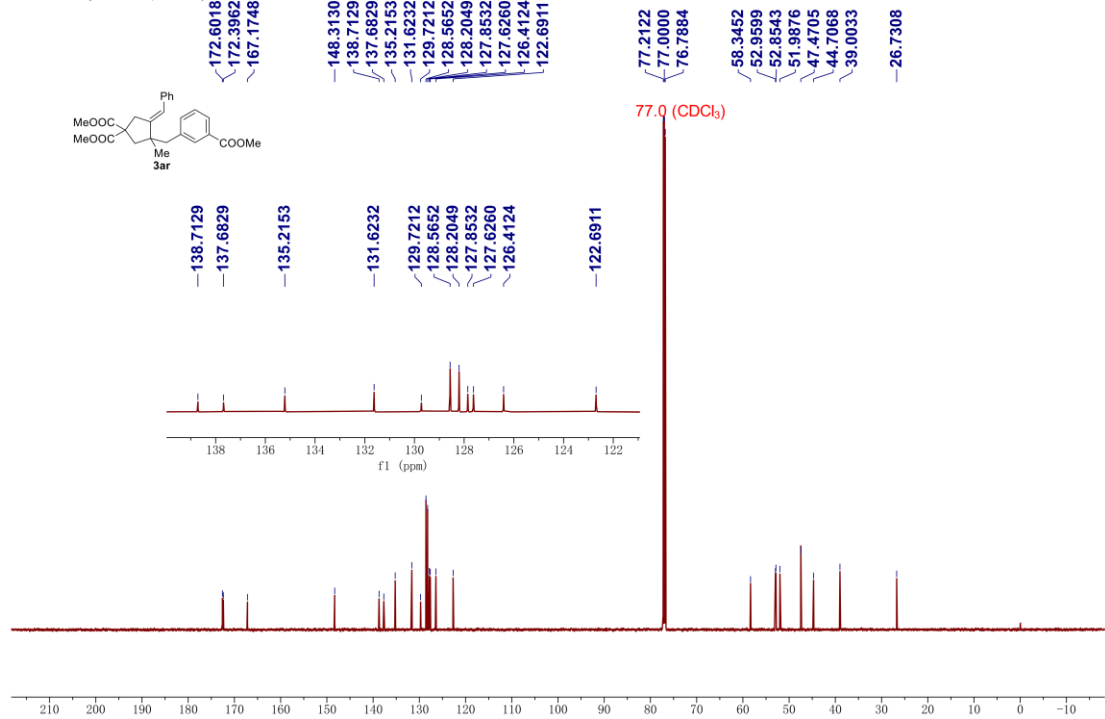



<sup>1</sup>H NMR (600 MHz, CDCl<sub>3</sub>)

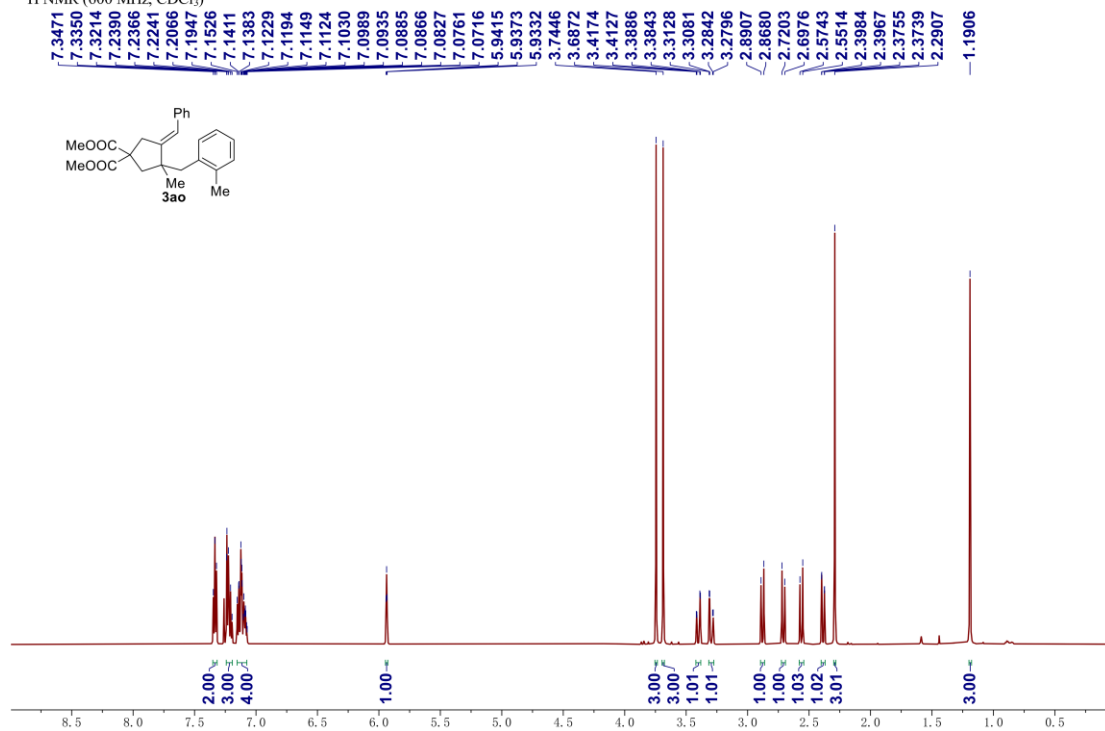

<sup>13</sup>C NMR (151 MHz, CDCl<sub>3</sub>)

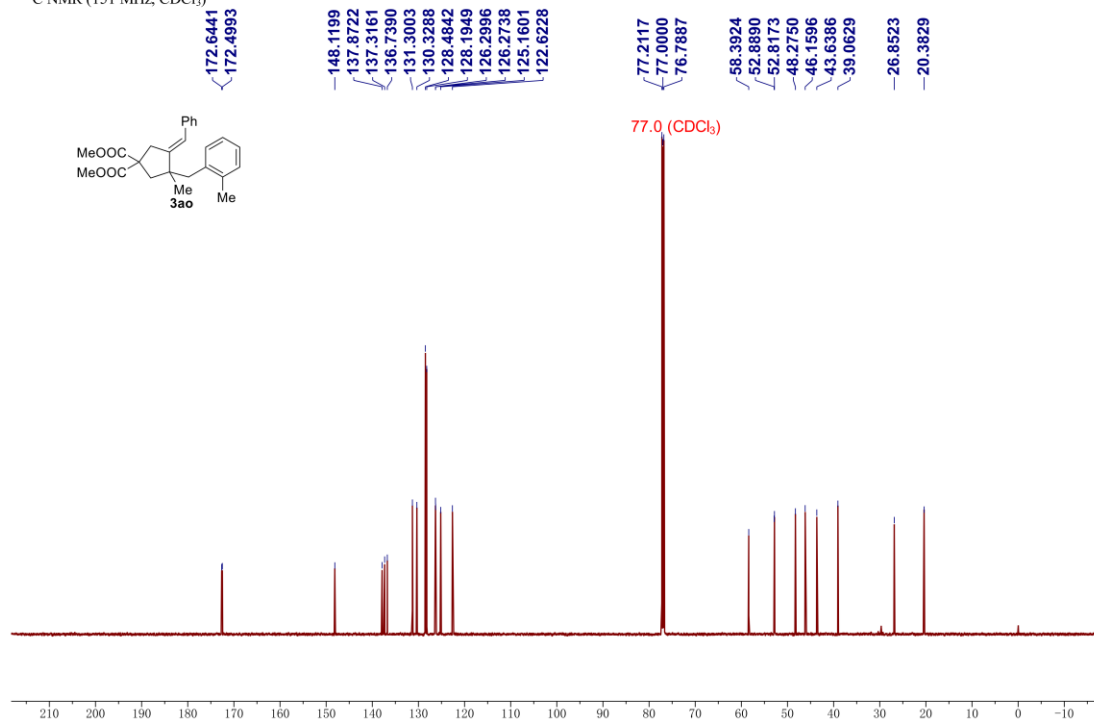

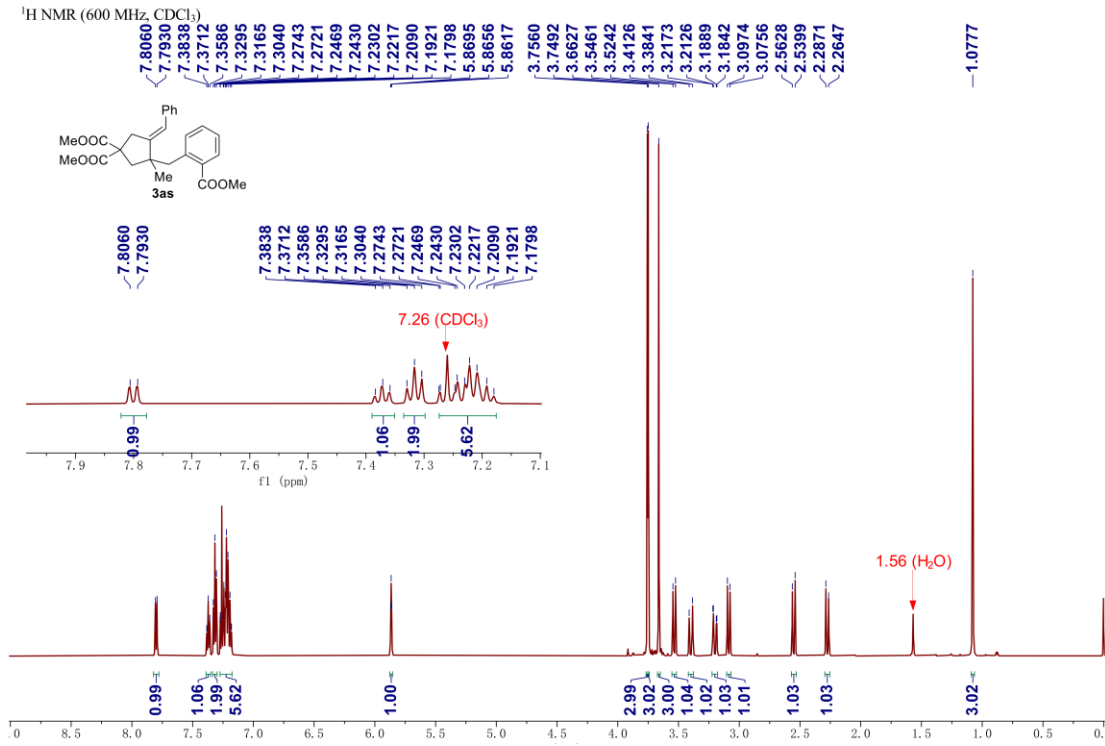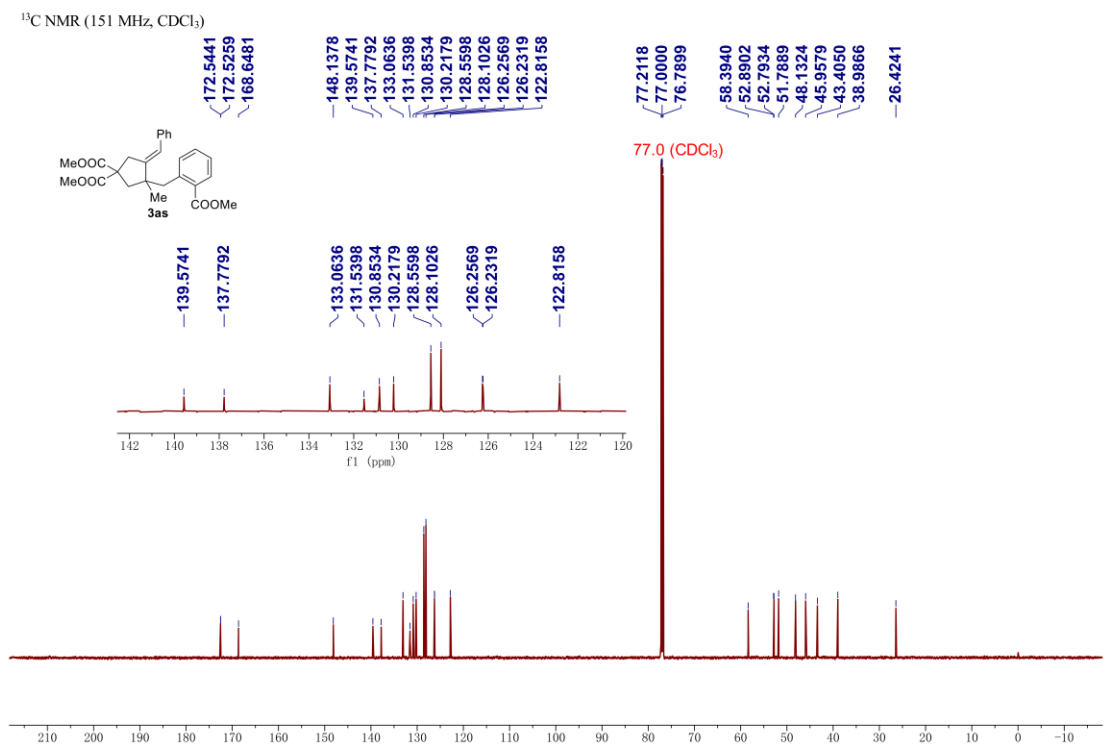

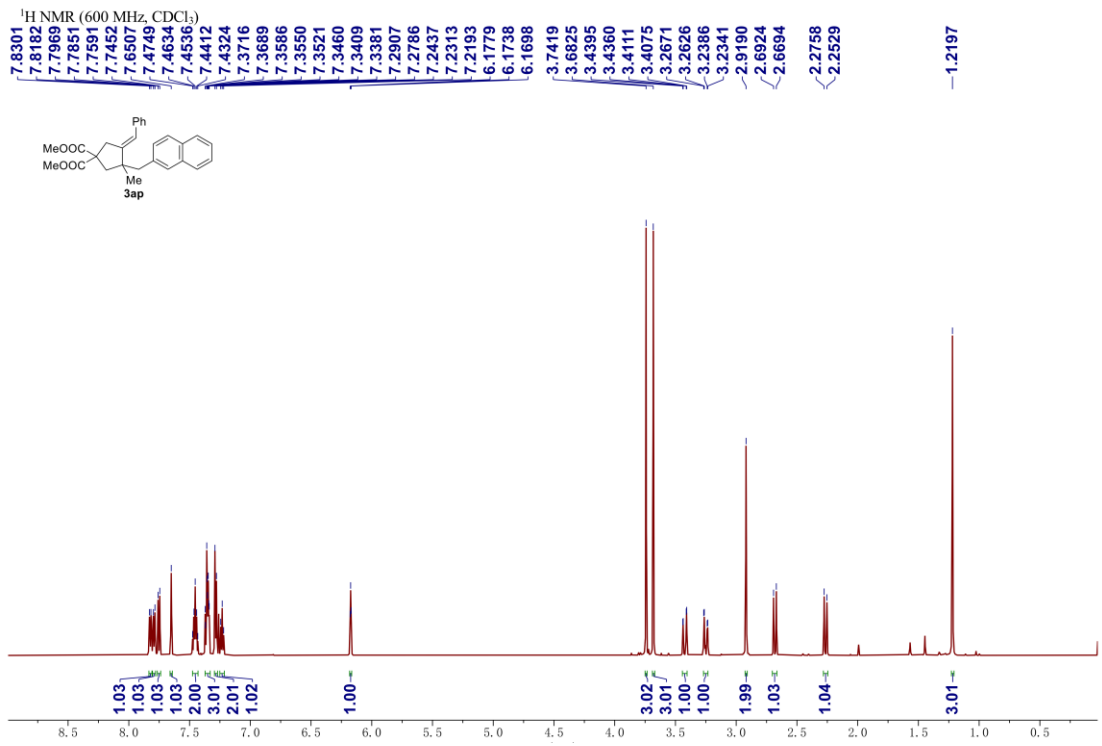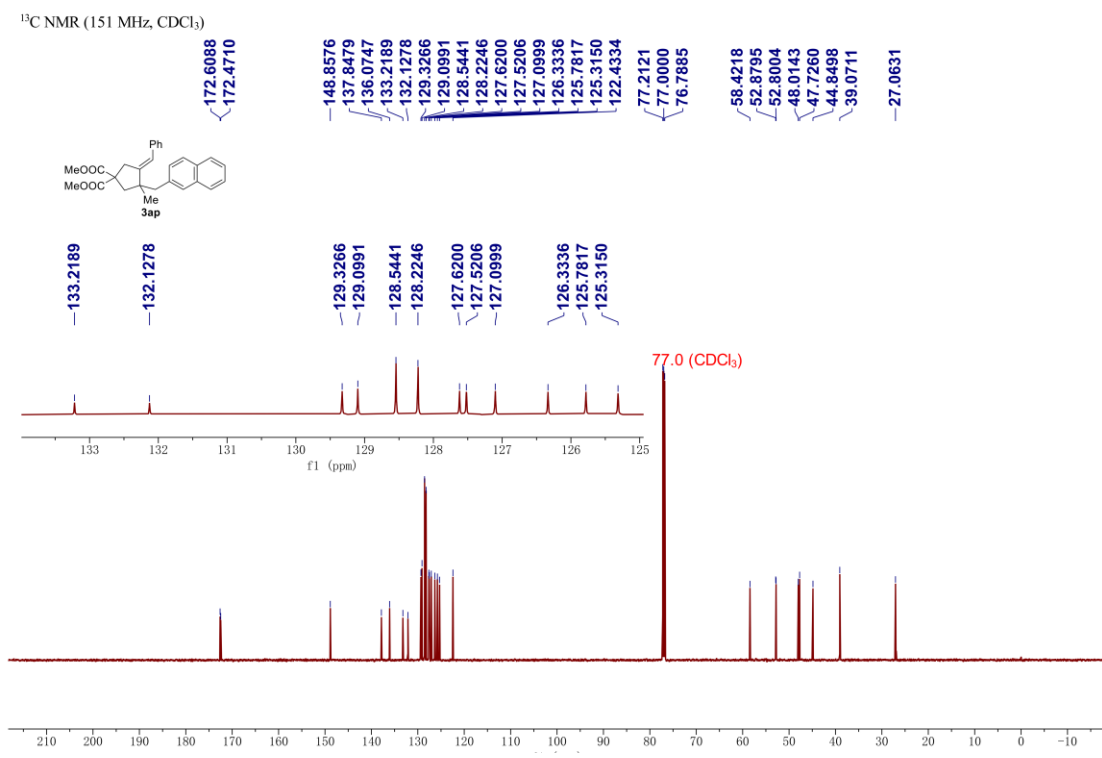

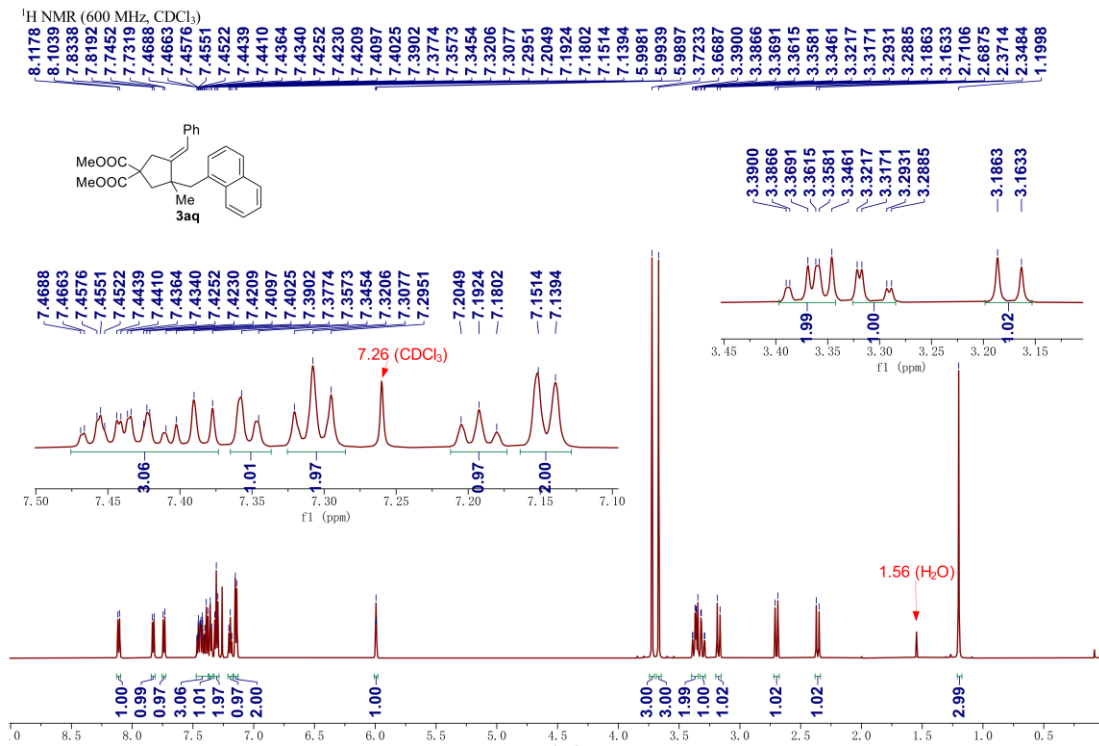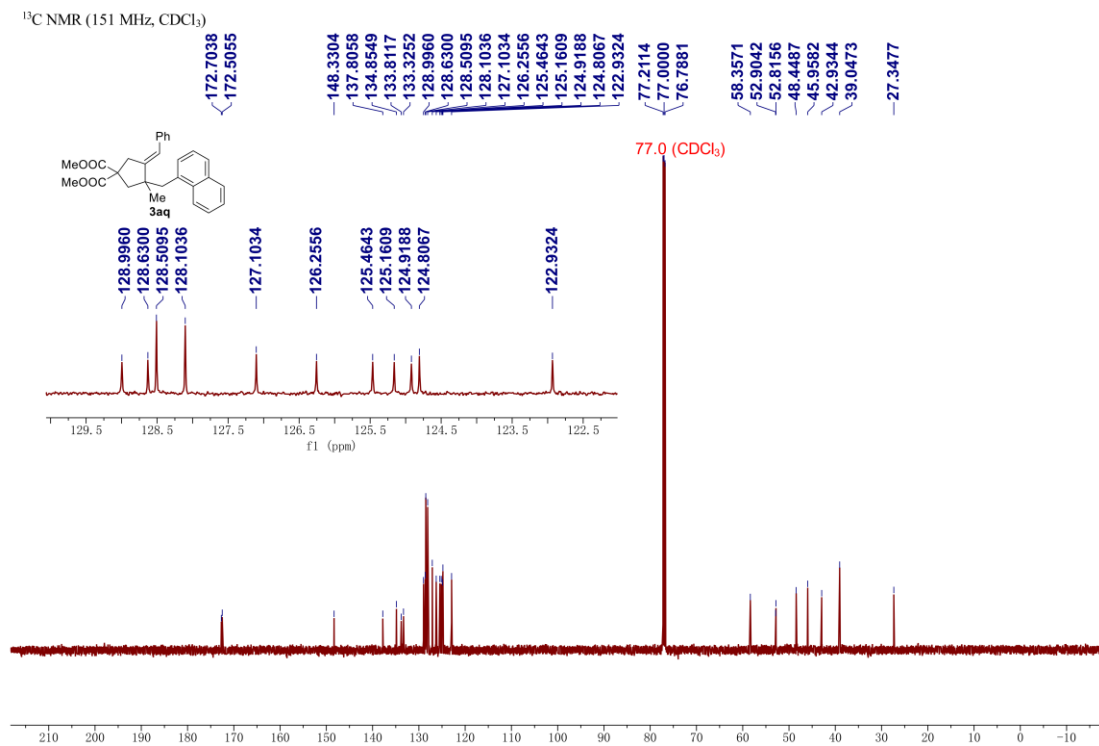

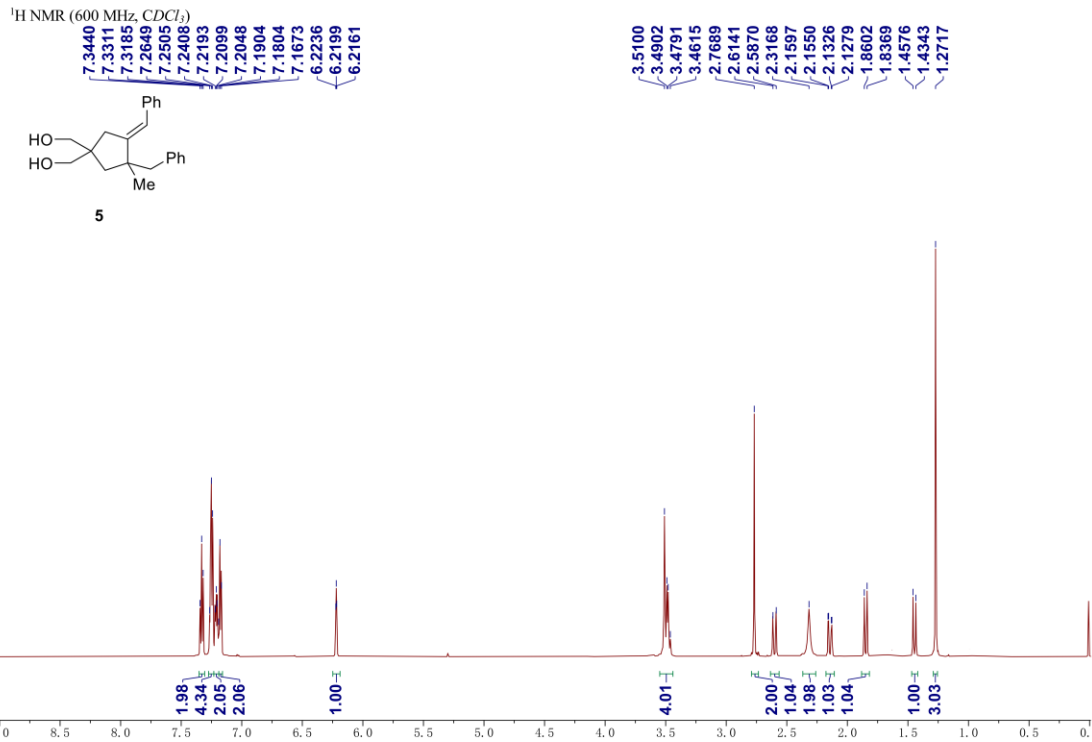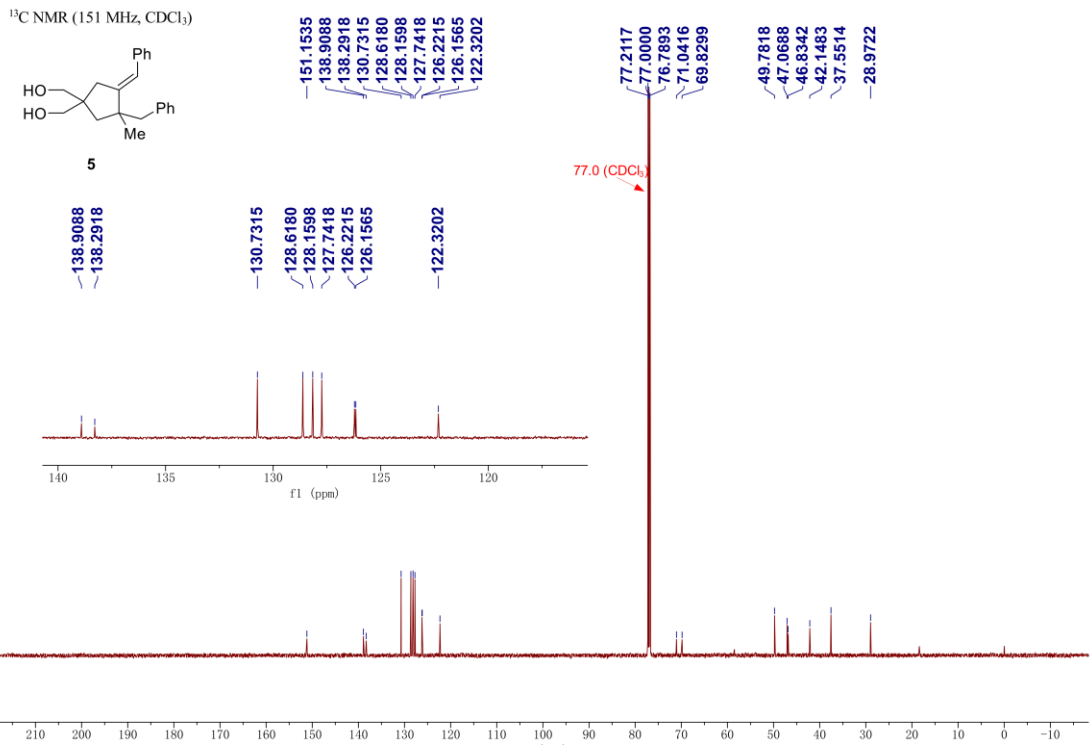

<sup>1</sup>H NMR (600 MHz, CDCl<sub>3</sub>)

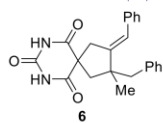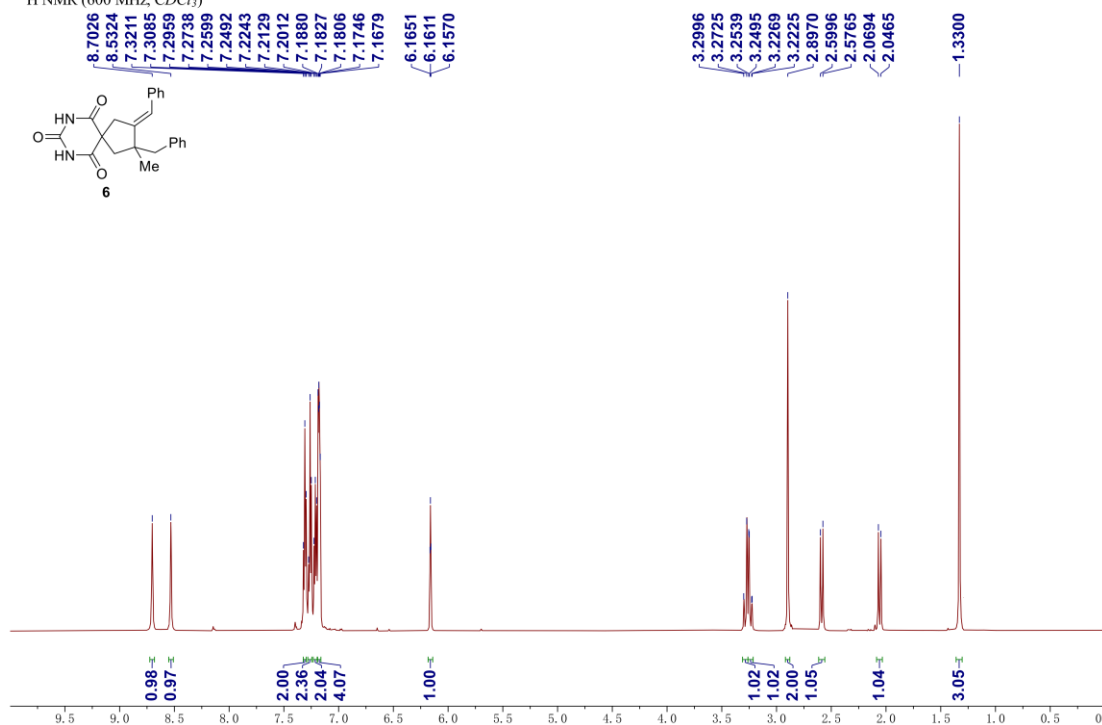

<sup>13</sup>C NMR (151 MHz, CDCl<sub>3</sub>)

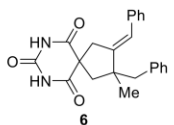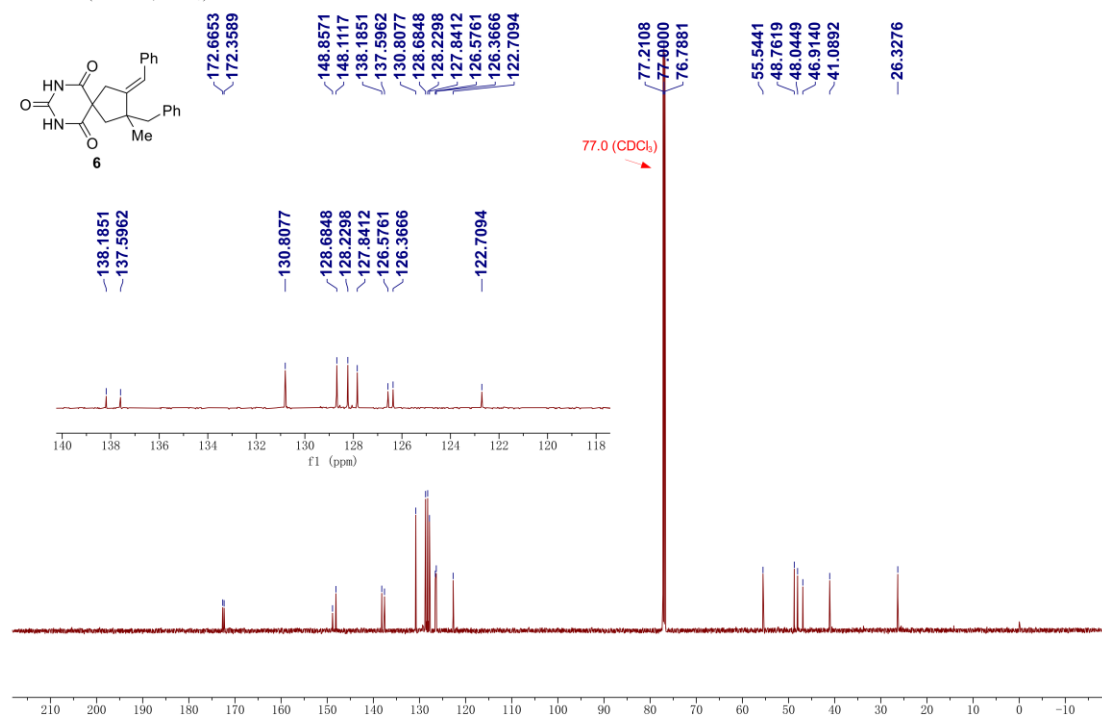

<sup>1</sup>H NMR (600 MHz, CDCl<sub>3</sub>)

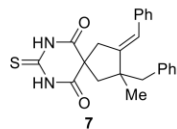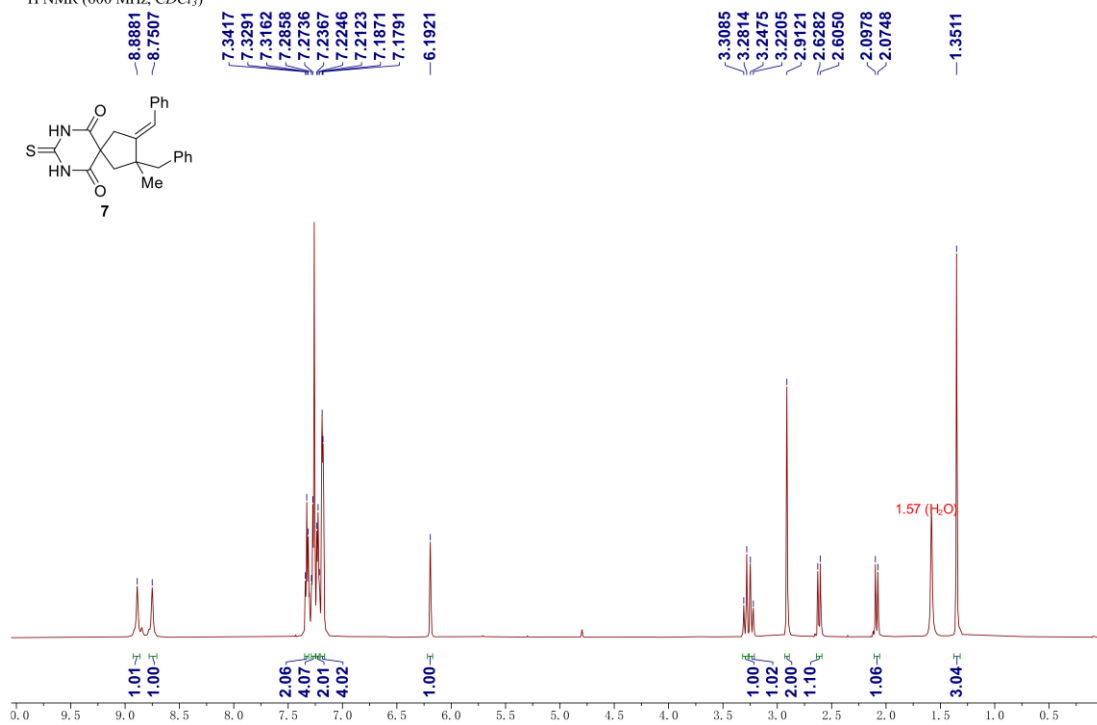

<sup>13</sup>C NMR (151 MHz, CDCl<sub>3</sub>)

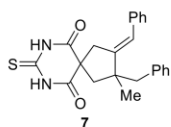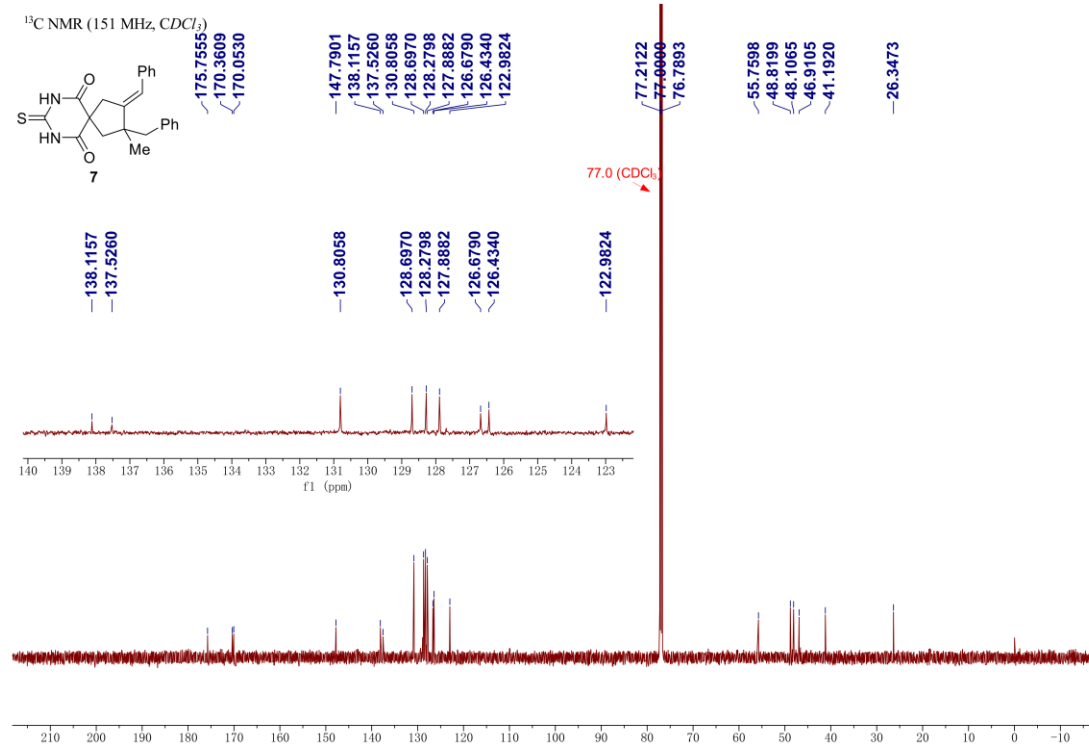

<sup>1</sup>H NMR (600 MHz, CDCl<sub>3</sub>)

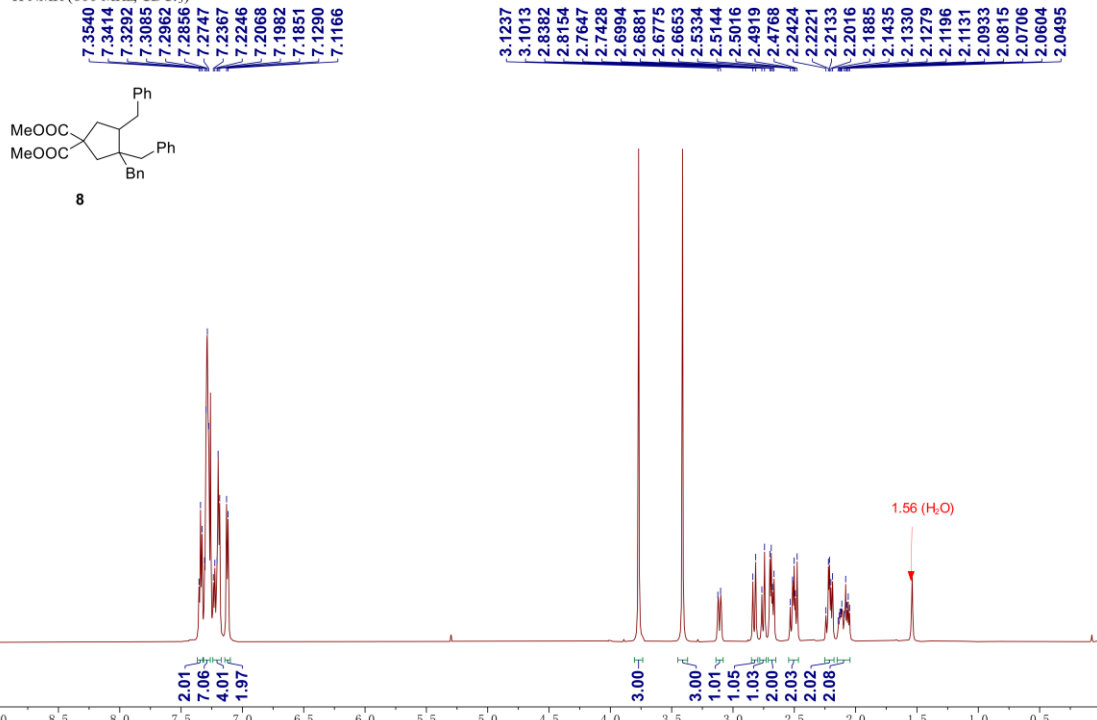

<sup>13</sup>C NMR (151 MHz, CDCl<sub>3</sub>)

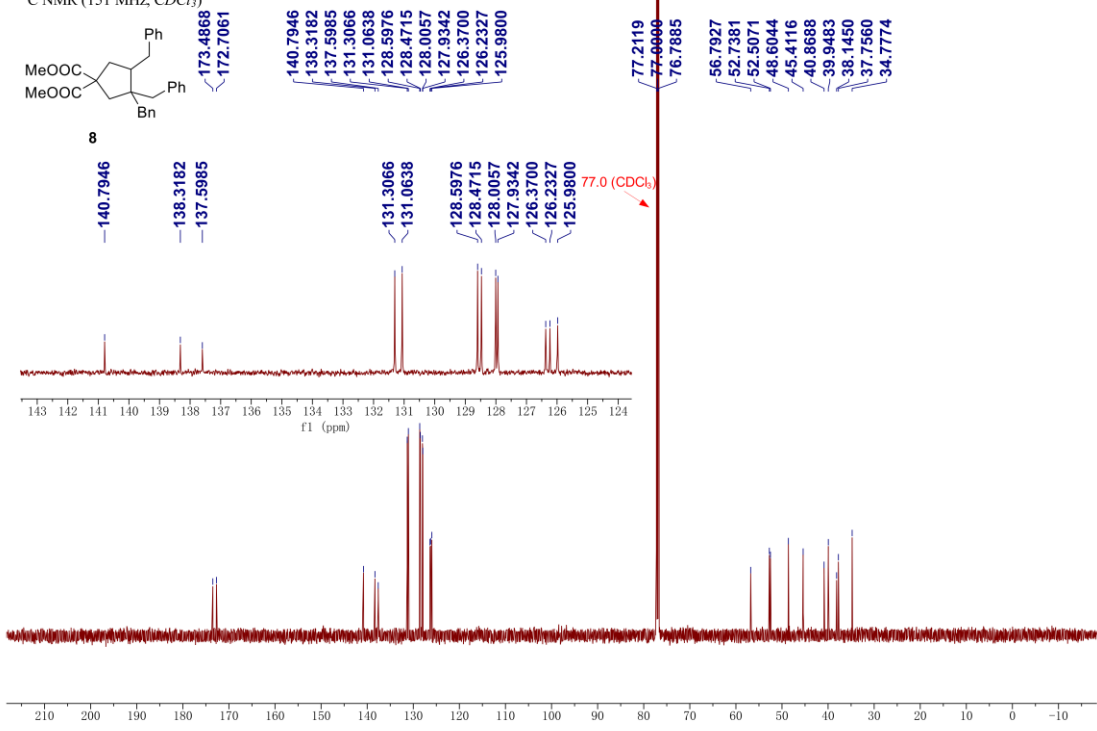



### 13. References

- 1 O. Buisine, C. Aubert and M. Malacria, Cobalt(I)-mediated cycloisomerization of enynes: *mechanistic insights*, *Chem. – Eur. J.* 2001, **7**, 3517–3525.
- 2 K. Masutomi, K. Noguchi and K. Tanaka, Enantioselective cycloisomerization of 1,6-enynes to bicyclo[3.1.0]hexanes catalyzed by rhodium and benzoic acid, *J. Am. Chem. Soc.* 2014, **136**, 7627–7630.
- 3 J. Chen and T. Hayashi, Asymmetric synthesis of alkylzincs by rhodium-catalyzed enantioselective arylation cyclization of 1,6-enynes with arylzincs, *Angew. Chem., Int. Ed.*, 2020, **59**, 18510–18514.
- 4 R. Tomita, T. Koike and M. Akita, Photoredox-catalyzed oxytrifluoromethylation of allenes: stereoselective synthesis of 2-trifluoromethylated allyl acetates, *Chem. Commun.* 2017, **53**, 4681–4684.
- 5 L. O'Brien, S. N. Karad, W. Lewis and H. W. Lam, Rhodium-catalyzed arylation cyclization of alkynyl malonates by 1,4-rhodium(I) migration, *Chem. Commun.* 2019, **55**, 11366–11369.
- 6 V. K. Rawat, K. Higashida and M. Sawamura, Use of imidazo[1,5-*a*]pyridin-3-ylidene as a platform for metal-imidazole cooperative catalysis: silver-catalyzed cyclization of alkyne-tethered carboxylic acids, *Adv. Synth. Catal.* 2021, **363**, 1631–1637.
- 7 M.-M. Wang, S.-M. Lu and C. Li, Carbo-carboxylation of alkenes via intramolecular heck carbonylation utilizing CO<sub>2</sub> and hydrosilane, *ACS Catal.* 2022, **12**, 10801–10807.
- 8 Zhang, Y.; Wang, Y.-J.; Zou, Q.; Liu, X.-Y.; Chen, Z. Two divergent enyne cycloisomerization routes mediated by monoallenylidene Pd(II) catalysts, *Org. Lett.* 2022, **24**, 8153–8157.
- 9 P. Heimbach, Wechselnde Koordinationszahlen bei Ni(O)- und Ni(I)-Verbindungen, *Angew. Chem., Int. Ed.*, 1964, **76**, 586–586.
- 10 S. J. Hwang, D. C. Powers, A. G. Maher and D. G. Nocera, Tandem redox mediator/Ni(II) trihalide complex photocycle for hydrogen evolution from HCl, *Chem. Sci.* 2015, **6**, 917–922.
- 11 M. J. Frisch, G. W. Trucks, H. B. Schlegel, G. E. Scuseria, M. A. Robb, J. R. Cheeseman, G. Scalmani, V. Barone, B. Mennucci, G. A. Petersson, H. Nakatsuji, M. Caricato, X. Li, H. P. Hratchian, A. F. Izmaylov, J. Bloino, G. Zheng, J. L. Sonnenberg, M. Hada, M. Ehara, K. Toyota, R. Fukuda, J. Hasegawa, M. Ishida, T. Nakajima, Y. Honda, O. Kitao, H. Nakai, T. Vreven, J. A. Montgomery, J. J. E. Peralta, F. Ogliaro, M. Bearpark, J. J. Heyd, E. Brothers, K. N. Kudin, V. N. Taroverov, T. Keith, R. Kobayashi, J. Normand, K. Raghavachari, A. Rendell, J. C. Burant, S. S. Iyengar, J. Tomasi, M. Cossi, N. Rega, J. M. Millam, M. Klene, J. E. Knox, J. B. Cross, V. Bakken, C. Adamo, J. Jaramillo, R. Gomperts, R. E. Stratmann, O. Yazyev, A. J. Austin, R. Cammi, C. Pomelli, J. W. Ochterski, R. L. Martin, K. Morokuma, V. G. Zakrzewski, G. A. Voth, P. Salvador, J. J. Dannenberg, S. Dapprich, A. D. Daniels, O. Farkas, J. B. Foresman, J. V. Ortiz, J. Cioslowski, D. J. Fox, Gaussian 09 (Revision D.01) I.

- Gaussian, Wallingford, CT, 2013.
- 12 S. Grimme, J. Antony, S. Ehrlich and H. Krieg, A consistent and accurate ab initio parametrization of density functional dispersion correction (DFT-D) for the 94 elements H-Pu, *J. Chem. Phys.* 2010, **132**, 154104–154119.
  - 13 S. Grimme, S. Ehrlich and L. Goerigk, Effect of the damping function in dispersion corrected density functional theory, *J. Comput. Chem.* 2011, **32**, 1456–1465.
  - 14 P. J. Hay and W. R. Wadt, Ab initio effective core potentials for molecular calculations. Potentials for K to Au including the outermost core orbitals, *J. Chem. Phys.* 1985, **82**, 299–310.
  - 15 W. J. Hehre and R. Ditchfield, J. A. Pople, Self-consistent molecular orbital methods. xii. further extensions of gaussian-type basis sets for use in molecular orbital studies of organic molecules, *J. Chem. Phys.* 1972, **56**, 2257–2261.
  - 16 A. V. Marenich, C. J. Cramer and D. Truhlar, Universal solvation model based on solute electron density and on a continuum model of the solvent defined by the bulk dielectric constant and atomic surface tensions, *J. Phys. Chem. B* 2009, **113**, 6378–6396.
  - 17 C. Gonzalez and H. B. Schlegel, An improved algorithm for reaction path following, *J. Chem. Phys.* 1989, **90**, 2154–2161.
